# Supplementary material for: Genome-wide characterization of ubiquitin-conjugating enzyme gene family explores its genetic effects on the oil content and yield of Brassica napus
Source: Front Plant Sci. 2023 Mar 20;14:1118339. doi: 10.3389/fpls.2023.1118339 (PMC10067767; doi:10.3389/fpls.2023.1118339)
Supplement: Supplementary file 6 [file Table_1.xlsx]

## Sheet: Sheet1
Table S1. Details of the UBC gene family in B. napus.
Locus name	Gene Location	Transcript length(bp)	Protein length(aa)	PI	MW (Da)	Instability index	GRAVY	Subcellular localization	Domain Location(PF00179)
BnaA01g01300D	chrA01:671836-672911:-	632	161	8.99	18524.1	8.99	-0.657	Nucleus	19-155
BnaA01g13200D	chrA01:6638482-6638872:+	210	69	8.06	7831.12	8.06	-0.22	Nucleus	6-59
BnaA01g16780D	chrA01:8780941-8786012:-	2366	637	9.2	71993	35.58	0.092	Nucleus	494-630
BnaA01g17560D	chrA01:9282575-9284696:+	1285	304	5.43	33620.7	52.39	-0.568	Nucleus	15-124
BnaA01g25670D	chrA01:17894249-17895875:+	856	181	4.89	20004.6	55.15	-0.419	Nucleus	40-174
BnaA01g27470D	chrA01:19201662-19204005:-	1229	308	5.41	33951.5	48.52	-0.312	Nucleus	15-126
BnaA01g28850D	chrA01:20018444-20021359:+	2131	598	4.7	66214.4	47.58	-0.619	Nucleus	331-475 569-586
BnaA01g32320D	chrA01:21770966-21772613:-	851	148	7.71	16551.1	46.66	-0.373	Nucleus	5-141
BnaA02g07130D	chrA02:3393966-3395451:+	975	170	5.56	19174.9	47.82	-0.415	Nucleus	9-162
BnaA02g10330D	chrA02:5261109-5262667:+	1006	148	7.71	16537.1	48.11	-0.321	Nucleus	5-141
BnaA02g15070D	chrA02:8657064-8658372:+	480	159	5.45	18081.7	45.75	-0.581	Nucleus	41-133
BnaA02g19070D	chrA02:11768155-11769736:+	747	145	6.74	16404	45.82	-0.283	Cytoplasm. Nucleus	9-137
BnaA02g26550D	chrA02:19590818-19592379:+	887	152	5.37	17279.5	72.04	-0.562	Cytoplasm. Nucleus	8-144
BnaA02g33480D	chrA02:24000200-24001647:+	723	150	5.63	17132.5	75.74	-0.482	Cytoplasm. Nucleus	8-144
BnaA03g11080D	chrA03:4983062-4985045:-	893	217	8.13	24503.3	46.3	-0.218	Nucleus	74-210
BnaA03g12310D	chrA03:5591785-5593248:+	831	148	7.71	16537.1	48.11	-0.321	Nucleus	5-141
BnaA03g13470D	chrA03:6125482-6127190:+	972	192	4.98	21117.9	44.89	-0.38	Nucleus	6-144
BnaA03g15110D	chrA03:6964629-6965584:-	853	180	9.54	20249.5	55.51	-0.241	Nucleus	36-173
BnaA03g21240D	chrA03:10096997-10098375:-	831	187	4.32	21158.6	46.19	-0.614	Nucleus	11-142
BnaA03g31080D	chrA03:15024995-15026497:-	790	148	7.71	16537.1	46.66	-0.374	Nucleus	5-141
BnaA03g33820D	chrA03:16378799-16381250:+	1380	459	5.25	51188.6	53.15	-0.565	Nucleus	222-368 415-450
BnaA03g37430D	chrA03:18556804-18558977:-	1469	431	5.93	46715.4	43.34	-0.614	Nucleus	10-160
BnaA03g39290D	chrA03:19584138-19585096:+	610	148	7.68	16678.3	38.42	-0.218	Nucleus	5-141
BnaA03g39410D	chrA03:19632399-19639322:-	3796	1212	4.65	134925	45.29	-0.612	Nucleus	997-1075
BnaA03g53560D	chrA03:28144299-28150347:-	2922	672	5.56	75669.4	50.12	-0.474	Nucleus	437-551
BnaA03g55110D	chrA03_random:162276-165336:-	1205	326	5.72	35610.5	33.86	-0.317	Nucleus	22-157
BnaA04g02190D	chrA04:1403708-1405865:+	1043	160	8.42	17874.4	47.37	-0.493	Nucleus	9-150
BnaA04g03650D	chrA04:2476232-2477693:-	866	167	5.62	18783.3	39.09	-0.471	Nucleus	10-159
BnaA04g05360D	chrA04:4123043-4124379:+	916	146	6.51	16576.9	26.4	-0.554	Nucleus	43-132
BnaA04g11090D	chrA04:9604910-9606802:-	925	186	4.19	21168.6	41.87	-0.668	Cytoplasm	11-142
BnaA04g19750D	chrA04:15424506-15429219:-	3494	865	4.83	95719.3	38.82	-0.288	Nucleus	625-771
BnaA04g26620D	chrA04:18823029-18824390:-	816	189	4.23	21339.7	47.97	-0.633	Nucleus	11-142
BnaA04g27280D	chrA04_random:17176-18733:-	731	161	8.39	18172.6	47.43	-0.712	Nucleus	9-151
BnaA05g13430D	chrA05:8181309-8182567:-	848	146	6.2	16572.8	21.36	-0.562	Nucleus	43-131
BnaA05g14740D	chrA05:9210370-9212035:+	852	283	9.45	32133.8	31.17	-0.429	Nucleus	79-208
BnaA05g14750D	chrA05:9219100-9220617:+	996	331	8.84	37597.6	35.83	-0.481	Nucleus	92-203
BnaA05g14770D	chrA05:9236508-9239034:+	1398	465	8.94	52142.2	47.87	-0.484	Nucleus	147-284
BnaA05g15820D	chrA05:10360161-10361557:+	840	175	5.68	19419	55.02	-0.391	Nucleus	33-168
BnaA05g17550D	chrA05:12415950-12416642:+	495	111	6.08	12570.4	30.77	-0.359	Nucleus	1-106
BnaA05g17560D	chrA05:12433526-12433914:+	282	93	6.53	10829.7	21	0.071	Nucleus	18-93
BnaA05g18620D	chrA05:13996946-13999042:-	827	211	8.69	23621	60.48	-0.428	Nucleus	61-204
BnaA05g19090D	chrA05:14423186-14424803:+	896	182	5.04	20107.8	53.64	-0.369	Nucleus	40-175
BnaA05g24190D	chrA05:18172654-18175463:-	1886	552	4.82	60788.6	48.12	-0.508	Nucleus	303-448
BnaA05g29530D	chrA05:20586106-20587411:-	681	148	7.71	16537.1	46.66	-0.374	Nucleus	5-141
BnaA05g37000D	chrA05_random:2839024-2840498:+	813	183	9.04	20272.3	36.43	-0.214	Nucleus	41-177
BnaA06g01230D	chrA06:781764-783939:+	1461	486	5.73	54326.2	43.78	-0.411	Nucleus	234-377
BnaA06g02780D	chrA06:1652888-1654307:+	796	181	5.02	20034.6	57.55	-0.464	Nucleus	40-174
BnaA06g09230D	chrA06:4986689-4988401:-	1340	153	5.63	17289.5	67.03	-0.601	Cytoplasm. Nucleus.	8-144
BnaA06g10330D	chrA06:5473009-5474776:-	863	148	7.71	16551.1	46.66	-0.373	Nucleus	5-141
BnaA06g11360D	chrA06:5918330-5920273:-	797	153	6.74	17219.9	49.9	-0.319	Cytoplasm. Nucleus.	9-145
BnaA06g11590D	chrA06:6022702-6025309:-	1071	235	9.05	26342.3	54.9	-0.435	Nucleus	9-132
BnaA06g27860D	chrA06:19166223-19167584:+	872	157	8.7	17737.5	45.28	-0.275	Nucleus	7-147
BnaA06g34030D	chrA06:22531509-22533023:-	807	152	5.37	17279.5	72.04	-0.562	Nucleus	8-144
BnaA07g03330D	chrA07:2973308-2985859:+	5452	1649	5.06	184412	46.73	-0.731	Nucleus	1403-1536
BnaA07g03430D	chrA07:3082376-3083741:-	713	148	7.66	16700.3	49.02	-0.254	Nucleus	5-141
BnaA07g10040D	chrA07:9593388-9594882:+	801	158	5.7	17960.6	38.49	-0.574	Nucleus	41-144
BnaA07g15340D	chrA07:13279544-13281083:-	664	184	4.21	21000.4	44.93	-0.664	Nucleus	11-142
BnaA07g17510D	chrA07:14641025-14642901:-	804	160	8.42	17843.4	47.37	-0.481	Nucleus	9-150
BnaA07g28330D	chrA07:20470337-20471775:-	833	153	5.34	17298.5	75.47	-0.551	Cytoplasm. Nucleus.	8-144
BnaA07g34450D	chrA07:23414667-23416651:+	864	153	6.74	17191.8	51.65	-0.322	Cytoplasm. Nucleus.	9-145
BnaA07g37890D	chrA07_random:1347529-1348394:-	504	167	5.19	18743.2	33.4	-0.441	Nucleus	10-159
BnaA07g38410D	chrA07_random:1616339-1618119:+	665	155	6.13	17312.9	56.18	-0.285	Cytoplasm. Nucleus.	9-147
BnaA08g01350D	chrA08:1057420-1060065:+	1483	480	8.5	53132.1	42.68	-0.438	Nucleus	203-346
BnaA08g02120D	chrA08:1624194-1624852:+	387	128	5.06	14312.1	56.31	-0.434	Nucleus	5-123
BnaA08g07400D	chrA08:7415595-7416602:-	526	166	7.83	18995.6	51.89	-0.668	Nucleus	15-126
BnaA08g09170D	chrA08:8822241-8823784:+	168	55	5.53	6103.89	18.49	-0.251	Nucleus	15-54
BnaA08g13930D	chrA08:11920352-11924814:+	2102	648	9.35	72677.8	33.74	0.112	Nucleus	505-641
BnaA08g20580D	chrA08:15479048-15480780:+	807	158	5.32	17862.5	41.24	-0.54	Nucleus	41-136
BnaA08g23200D	chrA08:16611559-16614728:+	1160	235	9	26347.4	58.15	-0.477	Nucleus	9-132
BnaA08g23450D	chrA08:16689460-16691344:+	845	153	6.74	17233.9	48.64	-0.305	Cytoplasm. Nucleus	9-145
BnaA08g24010D	chrA08:16938315-16939721:+	703	152	5.34	17281.4	73.6	-0.589	Cytoplasm. Nucleus.	8-144
BnaA08g24020D	chrA08:16940213-16941605:+	570	190	6.59	22237.3	62.94	-0.481	Nucleus	44-179
BnaA09g04490D	chrA09:2209624-2210956:-	609	202	8.27	22774.2	50.68	-0.22	Nucleus	52-192
BnaA09g09660D	chrA09:4865818-4867098:-	832	232	9.57	26416.5	46.61	-0.496	Nucleus	82-217
BnaA09g11510D	chrA09:5900570-5901794:+	814	148	7.73	16505	45.3	-0.308	Nucleus	5-141
BnaA09g12050D	chrA09:6314955-6316004:+	543	180	6.94	20464.7	50.45	-0.093	Nucleus	50-173
BnaA09g16240D	chrA09:9649305-9650873:-	894	174	8.32	19837.7	68.96	-0.383	Nucleus	19-167
BnaA09g19140D	chrA09:12022907-12024199:+	816	152	5.37	17279.5	72.04	-0.562	Cytoplasm. Nucleus.	8-144
BnaA09g30000D	chrA09:22359097-22360539:+	740	158	5.32	17836.5	41.68	-0.554	Nucleus	41-136
BnaA09g32990D	chrA09:24389854-24391472:-	848	146	6.51	16515.8	24.67	-0.54	Nucleus	43-132
BnaA09g34960D	chrA09:25545538-25547108:+	906	167	5.2	18872.4	38.8	-0.444	Nucleus	10-159
BnaA09g45050D	chrA09:30884928-30887459:+	1005	235	8.77	26457.5	55.97	-0.417	Nucleus	9-132
BnaA09g57120D	chrA09_random:4035452-4036922:+	808	152	5.34	17281.4	73.6	-0.589	Cytoplasm. Nucleus.	8-144
BnaA10g03140D	chrA10:1601107-1603155:+	1004	149	6.39	16819.3	60.99	-0.032	Nucleus	74-136
BnaA10g06670D	chrA10:5152188-5153779:-	876	148	7.71	16523.1	49.41	-0.322	Nucleus	5-141
BnaA10g10300D	chrA10:8797704-8799298:+	1107	148	6.82	16555.9	50.97	-0.417	Nucleus	5-141
BnaA10g10530D	chrA10:8986637-8987000:+	198	65	4.8	7480.46	28.82	-0.352	Cytoplasm	3-64
BnaA10g12310D	chrA10:10170717-10172097:-	721	165	5.36	18732.3	37.05	-0.352	Nucleus	11-157
BnaA10g25250D	chrA10:16289585-16291032:+	758	176	5.08	19734.7	40.38	-0.132	Nucleus	43-175
BnaA10g28230D	chrA10_random:531490-533240:-	675	161	8.33	18352.9	61.53	-0.583	Nucleus	19-154
BnaAnng04570D	chrAnn_random:5284726-5285418:-	495	111	6.08	12584.4	27.96	-0.364	Nucleus	1-106
BnaAnng09200D	chrAnn_random:9698520-9700252:-	584	161	7.04	18410	72.59	-0.488	Nucleus	19-154
BnaAnng13030D	chrAnn_random:14021110-14023147:+	1145	153	6.74	17205.8	52.91	-0.32	Cytoplasm. Nucleus.	9-145
BnaAnng19750D	chrAnn_random:21646216-21647104:+	514	161	9.15	18452	53.27	-0.708	Nucleus	19-155
BnaAnng21880D	chrAnn_random:24359973-24361528:+	1069	150	5.63	17132.5	75.74	-0.482	Cytoplasm. Nucleus.	8-144
BnaAnng28650D	chrAnn_random:32769308-32770832:-	1024	160	8.35	17822.6	47.42	-0.196	Nucleus	17-153
BnaAnng34240D	chrAnn_random:39013386-39015202:-	796	160	8.41	17919.5	47.85	-0.475	Nucleus	9-150
BnaC01g02310D	chrC01:1189076-1190130:-	632	161	8.99	18513	62.49	-0.657	Nucleus	19-155
BnaC01g20530D	chrC01:14416767-14421396:-	2337	637	9.2	72011.1	37.78	0.083	Nucleus	494-630
BnaC01g21910D	chrC01:15361419-15363371:+	1010	304	5.56	33678.8	52.12	-0.588	Nucleus	15-124
BnaC01g24100D	chrC01:18582000-18582390:+	210	69	8.06	7831.12	43.02	-0.22	Nucleus	6-59
BnaC01g32360D	chrC01:31483442-31483980:+	243	80	5.46	9321.72	46.01	-0.479	Nucleus	10-79
BnaC01g32800D	chrC01:32038104-32039653:+	830	181	4.89	20002.6	54.98	-0.403	Nucleus	40-174
BnaC01g36100D	chrC01:35473529-35476671:-	2173	649	4.8	72054	45.97	-0.603	Nucleus	382-525
BnaC01g39370D	chrC01:38053446-38061974:-	1907	565	6.18	62336.7	50.34	-0.432	Cell membrane. Nucleus	422-558
BnaC01g44130D	chrC01_random:3723225-3725110:+	1003	308	5.21	33921.5	47.97	-0.297	Nucleus	15-126
BnaC02g02910D	chrC02:1325325-1325877:-	243	80	5.46	9299.75	41.46	-0.401	Nucleus	10-79
BnaC02g12440D	chrC02:7932837-7933721:-	468	156	4.97	17650	50.14	-0.049	Nucleus	5-92 119-148
BnaC02g10070D	chrC02:5731145-5732661:+	998	170	5.56	19172.8	44.88	-0.434	Nucleus	9-162
BnaC02g12450D	chrC02:7934125-7935915:-	1165	160	8.35	17851.6	45.74	-0.24	Nucleus	17-153
BnaC02g14410D	chrC02:9805587-9807121:+	959	148	7.71	16537.1	48.11	-0.321	Nucleus	5-141
BnaC02g25260D	chrC02:22610710-22612361:+	787	154	6.75	17406	50.09	-0.383	Cytoplasm. Nucleus.	9-146
BnaC02g34760D	chrC02:37394724-37396315:+	928	152	5.37	17279.5	72.04	-0.562	Cytoplasm. Nucleus.	8-144
BnaC03g01930D	chrC03:921645-925529:-	1239	340	5.61	37361.5	33.38	-0.252	Nucleus	36-171
BnaC03g13840D	chrC03:6676084-6677842:-	800	173	8.75	19710.7	46.95	-0.384	Nucleus	30-166
BnaC03g14940D	chrC03:7282058-7283590:+	945	184	7.6	20772.1	50.45	-0.124	Nucleus	5-23 59-177
BnaC03g16350D	chrC03:8305702-8307373:+	951	192	4.98	21089.9	45.28	-0.392	Nucleus	6-144
BnaC03g18130D	chrC03:9284198-9285163:-	865	180	9.25	20072.2	52.89	-0.183	Nucleus	36-173
BnaC03g25550D	chrC03:14348817-14350319:-	912	187	4.33	21186.6	48.55	-0.613	Nucleus	11-142
BnaC03g25560D	chrC03:14351178-14352247:-	568	177	5.78	20362.4	44.57	-0.172	Nucleus	13-140
BnaC03g36410D	chrC03:22004387-22005922:-	764	148	7.71	16537.1	46.66	-0.374	Nucleus	5-141
BnaC03g39070D	chrC03:24093324-24096709:+	1404	467	5	52582.6	49.05	-0.63	Nucleus	236-358 423-458
BnaC03g43880D	chrC03:28958706-28960733:-	1278	391	8.45	42635.2	45.97	-0.513	Nucleus	70-119
BnaC03g43920D	chrC03:28988462-28990134:-	1009	280	6.78	30492.4	49.76	-0.53	Nucleus	19-71
BnaC03g43940D	chrC03:28991393-28993483:-	1525	432	6.24	46823.6	40.87	-0.56	Nucleus	10-160
BnaC03g46610D	chrC03:31602173-31603167:+	638	148	7.71	16706.2	38.94	-0.283	Nucleus	5-141
BnaC03g46750D	chrC03:31687495-31692290:-	3442	1047	4.6	116462	42.07	-0.652	Nucleus	800-943
BnaC03g63160D	chrC03:52491651-52504693:+	462	153	4.47	17626.1	30.68	-0.119	Nucleus	98-138
BnaC03g68670D	chrC03:58345101-58345774:-	357	118	8.79	13421.5	42.98	-0.183	Nucleus	14-66 83-113
BnaC03g69050D	chrC03:58756769-58759799:+	1610	482	8.64	53361.4	42.08	-0.423	Nucleus	204-347
BnaC04g10080D	chrC04:7749576-7750026:-	204	67	8.79	7653.74	46.86	-0.904	Nucleus	5-44 44-60
BnaC04g21410D	chrC04:22293451-22295100:+	739	161	8.39	18158.5	47.43	-0.709	Nucleus	9-151
BnaC04g23980D	chrC04:25037365-25039352:+	782	160	8.41	17950.5	44.16	-0.496	Nucleus	9-151
BnaC04g25550D	chrC04:26667230-26669111:-	852	167	5.38	18769.2	39.09	-0.468	Nucleus	10-159
BnaC04g28100D	chrC04:29525167-29526679:+	920	146	6.59	16585.9	26.91	-0.552	Nucleus	43-132
BnaC04g37650D	chrC04:38933580-38935207:-	786	148	6.82	16541.8	50.97	-0.418	Nucleus	5-141
BnaC04g44130D	chrC04:44271614-44274978:-	2738	847	4.82	93663.8	42.02	-0.291	Nucleus	607-753
BnaC04g50680D	chrC04:48203082-48204434:-	816	189	4.23	21323.7	46.92	-0.611	Cytoplasm.	11-142
BnaC05g10640D	chrC05:6121805-6123462:-	1291	152	5.63	17283.5	70.14	-0.598	Cytoplasm. Nucleus.	8-144
BnaC05g12900D	chrC05:7494040-7496219:-	835	153	6.14	17220.9	49.9	-0.319	Cytoplasm. Nucleus.	9-145
BnaC05g13430D	chrC05:7745875-7748485:-	1702	235	8.92	26400.4	55.72	-0.458	Nucleus	9-132
BnaC05g18550D	chrC05:12282883-12284597:-	795	166	5.32	18734.6	41.94	-0.437	Nucleus	41-130
BnaC05g25370D	chrC05:20258236-20260050:+	779	169	7.62	19055.8	67.21	-0.409	Nucleus	19-162
BnaC05g27450D	chrC05:24448189-24449773:+	279	92	4.51	10779.2	65.77	-0.178	Nucleus	13-64
BnaC05g27600D	chrC05:24802524-24803217:-	496	111	6.08	12554.4	26.85	-0.341	Nucleus	1-106
BnaC05g27620D	chrC05:24805831-24807246:-	495	164	9.52	18387.6	39.54	-0.068	Nucleus	14-105
BnaC05g32470D	chrC05:32053075-32054714:+	895	182	5.02	20132.8	53.94	-0.392	Nucleus	42-175
BnaC05g38230D	chrC05:37006075-37008770:-	1714	544	4.8	60019.9	47.93	-0.499	Nucleus	296-443
BnaC05g39770D	chrC05:38200614-38202056:+	903	183	9.06	20280.4	35.31	-0.196	Nucleus	41-177
BnaC05g43870D	chrC05:40485410-40486751:-	740	148	7.71	16523	46.66	-0.376	Nucleus	5-141
BnaC05g49100D	chrC05_random:58113-59130:+	537	146	8.95	16647.1	62.85	-0.334	Nucleus	30-134
BnaC05g51200D	chrC05_random:2157447-2158734:+	802	175	5.69	19516.1	56.29	-0.398	Nucleus	33-168
BnaC06g01080D	chrC06:1751136-1752987:+	650	161	7.7	18343.8	60.6	-0.588	Nucleus	19-154
BnaC06g03670D	chrC06:4358145-4359574:-	759	181	5.17	19962.5	55.66	-0.447	Nucleus	40-174
BnaC06g06060D	chrC06:6583709-6585918:-	1527	508	6.17	56755.1	47.25	-0.443	Nucleus	245-388
BnaC06g10370D	chrC06:12527252-12529356:+	546	181	7.87	20686.7	37.66	-0.298	Nucleus	3-122
BnaC06g11310D	chrC06:13210904-13212313:+	943	146	6.2	16558.8	20.04	-0.577	Nucleus	43-131
BnaC06g16140D	chrC06:19129487-19131288:-	932	160	8.42	17843.4	47.37	-0.481	Nucleus	9-150
BnaC06g20310D	chrC06:22342377-22344309:-	848	170	5.22	19078.8	57.36	-0.276	Cytoplasm. Nucleus.	9-162
BnaC06g27370D	chrC06:28727479-28728149:+	351	116	6.39	13003.8	62.11	-0.342	Nucleus	5-69
BnaC06g30850D	chrC06:31513657-31515100:-	1081	153	5.34	17298.5	75.47	-0.551	Cytoplasm. Nucleus.	8-144
BnaC06g36210D	chrC06:34799747-34801759:+	764	161	7.04	18455.1	75.08	-0.488	Nucleus	19-154
BnaC06g39290D	chrC06:36475629-36477713:+	796	153	6.74	17207.8	53.71	-0.339	Cytoplasm. Nucleus.	9-145
BnaC06g41780D	chrC06_random:1049487-1051324:-	1331	427	9.1	47997	52.81	-0.606	Nucleus	165-289
BnaC06g41980D	chrC06_random:1336999-1338220:+	618	205	9.15	23641	35.61	-0.471	Nucleus	78-202
BnaC06g42330D	chrC06_random:1716864-1718530:-	852	189	4.26	21722.3	45.15	-0.66	Cytoplasm	11-142
BnaC07g04570D	chrC07:7127445-7129929:-	1453	431	6.37	48259.9	45.1	-0.367	Nucleus	179-323
BnaC07g05830D	chrC07:9383232-9384447:+	801	148	7.66	16728.3	50.03	-0.258	Nucleus	5-141
BnaC07g05960D	chrC07:9545998-9556173:-	5656	1644	4.92	183588	47.62	-0.737	Nucleus	1398-1531
BnaC07g13160D	chrC07:18640898-18642272:+	745	157	5.16	17690.3	46.8	-0.512	Nucleus	40-135
BnaC07g21870D	chrC07:28433315-28434558:+	763	141	4.76	15946.9	70.02	-0.568	Nucleus	8-133
BnaC07g29090D	chrC07:34002376-34003728:-	728	157	8.7	17737.5	45.28	-0.275	Nucleus	7-147
BnaC07g46220D	chrC07:43945051-43945517:-	363	120	7.81	13465.2	28.81	-0.408	Nucleus	47-96
BnaC07g51150D	chrC07_random:2886894-2887855:+	607	161	9.13	18516	51.54	-0.761	Nucleus	19-156
BnaC08g06250D	chrC08:8715648-8717439:-	850	158	5.32	17896.6	40.82	-0.539	Nucleus	41-134
BnaC08g12720D	chrC08:17846406-17847850:-	762	148	7.71	16493	43.82	-0.339	Nucleus	5-141
BnaC08g16110D	chrC08:20263376-20264150:-	324	107	4.54	12224.6	81.58	-0.716	Nucleus	7-49 50-101
BnaC08g17090D	chrC08:20803429-20805255:-	768	153	6.74	17205.8	52.91	-0.32	Cytoplasm. Nucleus.	9-145
BnaC08g17300D	chrC08:20895428-20898635:-	1963	236	9.47	26483.7	55.02	-0.471	Nucleus	9-132
BnaC08g23790D	chrC08:25974748-25977682:-	2263	146	6.51	16515.8	24.67	-0.54	Nucleus	43-132
BnaC08g26190D	chrC08:27679741-27681378:+	822	167	5.51	18898.4	34.93	-0.437	Nucleus	10-159
BnaC08g28860D	chrC08:29347440-29349467:-	949	160	8.41	17819.3	47.31	-0.486	Nucleus	9-150
BnaC08g37880D	chrC08:34442846-34445368:+	1046	238	8.74	26700.8	55.36	-0.441	Nucleus	9-132
BnaC08g38130D	chrC08:34582915-34584888:+	1041	153	6.74	17219.9	49.9	-0.319	Cytoplasm. Nucleus.	9-145
BnaC08g39660D	chrC08:35264196-35265620:+	1117	152	5.34	17281.4	73.6	-0.589	Cytoplasm. Nucleus.	8-144
BnaC09g11960D	chrC09:8327183-8328645:+	856	148	7.73	16505	45.3	-0.308	Nucleus	5-141
BnaC09g12280D	chrC09:8737324-8738457:-	627	159	8.4	18053.9	46.7	-0.301	Nucleus	12-152
BnaC09g17320D	chrC09:14092036-14094176:-	1256	225	9.16	25673.2	61.41	-0.435	Nucleus	95-218
BnaC09g29580D	chrC09:32250456-32252129:-	883	148	7.71	16523.1	49.41	-0.322	Nucleus	5-141
BnaC09g34500D	chrC09:37978414-37980817:-	754	179	5.78	20380	42.58	-0.422	Nucleus	28-171
BnaC09g51120D	chrC09_random:216935-218422:+	910	258	9.43	29775	48.85	-0.71	Nucleus	57-80 108-243
BnaCnng21490D	chrCnn_random:20051752-20053245:+	774	148	6.81	16557.9	49.67	-0.395	Nucleus	5-141
BnaCnng33990D	chrCnn_random:32240614-32242431:-	932	186	4.2	21156.6	44.03	-0.65	Nucleus	11-142
BnaCnng40140D	chrCnn_random:38659939-38661187:+	826	167	5.19	18743.2	33.4	-0.441	Nucleus	10-159
BnaCnng46390D	chrCnn_random:45696704-45697645:-	441	146	5.16	16527	43.41	-0.302	Nucleus	10-135
BnaCnng48400D	chrCnn_random:47685244-47686598:-	858	184	6.3	20854	39.53	-0.264	Nucleus	34-174
BnaCnng51160D	chrCnn_random:50671106-50672437:+	929	249	9.39	27307.4	30.96	-0.365	Nucleus	18-151
BnaCnng51240D	chrCnn_random:50748250-50749981:-	1016	152	5.34	17281.4	73.6	-0.589	Cytoplasm. Nucleus.	8-144
BnaCnng54670D	chrCnn_random:54496747-54497888:-	805	231	9.09	25048.6	34.52	-0.363	Nucleus	4-133
BnaCnng59170D	chrCnn_random:58868629-58869556:-	303	100	4.98	11063.8	41.76	-0.232	Nucleus	8-66 65-87
1 Chromosome: start position-end position: strand, (–) means antisense strand of chromosome, (+) means positive-sense strand of chromosome. 2 UQ_con(PF00179)
