# Supplementary material for: Genome-wide characterization of ubiquitin-conjugating enzyme gene family explores its genetic effects on the oil content and yield of Brassica napus
Source: Front Plant Sci. 2023 Mar 20;14:1118339. doi: 10.3389/fpls.2023.1118339 (PMC10067767; doi:10.3389/fpls.2023.1118339)
Supplement: Supplementary file 7 [file Table_2.xlsx]

## Sheet: Sheet1
Table S2. Details of UBC gene family in B. rapa and B. oleracea.
Locus name	Gene Location	Protein length(aa)	PI	MW(kDa)	Instability index	GRAVY	Subcellular localization	Domain Location(PF00179)
BraA01g002010.3C	A01:1007776-1008678:+	185	7.7	20887.8	46.55	-0.458	Nucleus.	35-170
BraA01g002330.3C	A01:1140316-1141244:-	161	8.99	18524.1	57.45	-0.657	Nucleus.	19-155
BraA01g018790.3C	A01:10009997-10011026:-	180	6.05	20135.2	42.47	-0.18	Nucleus.	5-27 55-173
BraA01g020570.3C	A01:11081496-11083258:+	304	5.43	33620.7	52.39	-0.568	Nucleus.	15-124
BraA01g033200.3C	A01:22726344-22727678:+	181	5.01	19987.6	55.15	-0.405	Nucleus.	40-174
BraA01g035590.3C	A01:24360931-24362610:-	308	5.41	33938.5	46.6	-0.303	Nucleus.	15-126
BraA01g036730.3C	A01:25024651-25027238:-	597	4.73	65998.2	45.62	-0.6	Nucleus.	330-474
BraA02g011090.3C	A02:5412512-5413525:+	170	5.56	19174.9	47.82	-0.415	Nucleus.	5-137
BraA02g013000.3C	A02:6584850-6587470:-	299	5.59	33662.5	48.52	-0.278	Nucleus.	9-162
BraA02g014670.3C	A02:7597433-7598431:+	148	7.71	16537.1	48.11	-0.321	Nucleus.	5-141 168-292
BraA02g019960.3C	A02:11497458-11498766:+	159	5.45	18081.7	45.75	-0.581	Nucleus.	5-141
BraA02g024910.3C	A02:14885654-14886932:+	153	6.15	17249.9	51.71	-0.356	Cytoplasm. Nucleus.	41-133
BraA02g043760.3C	A02:30274615-30275563:+	150	5.63	17132.5	75.74	-0.482	Cytoplasm. Nucleus.	9-145
BraA03g001920.3C	A03:868686-871121:-	319	5.72	34898.6	34.94	-0.37	Nucleus.	8-135
BraA03g013120.3C	A03:5711917-5713099:-	148	7.73	16551	44.07	-0.368	Nucleus.	8-144
BraA03g014550.3C	A03:6436906-6437887:+	148	7.71	16537.1	48.11	-0.321	Nucleus.	15-150
BraA03g015790.3C	A03:7225788-7227103:+	192	4.98	21117.9	44.89	-0.38	Nucleus.	5-141
BraA03g017350.3C	A03:8056545-8057190:-	180	9.54	20249.5	55.51	-0.241	Nucleus.	5-141
BraA03g024030.3C	A03:11838332-11839458:-	216	4.33	24427.3	42.79	-0.463	Nucleus.	6-144
BraA03g034200.3C	A03:16913531-16914620:-	148	7.71	16537.1	46.66	-0.374	Nucleus.	36-173
BraA03g036890.3C	A03:18238238-18240693:+	559	5.05	62363.6	50.76	-0.657	Nucleus.	11-140
BraA03g041200.3C	A03:20644371-20647480:-	649	7.16	70327.1	42.89	-0.582	Nucleus.	5-141
BraA03g043320.3C	A03:21820944-21821739:+	148	7.68	16678.3	38.42	-0.218	Nucleus.	289-435
BraA03g043410.3C	A03:21886027-21892717:-	1245	4.61	138053	44.85	-0.629	Nucleus.	10-159
BraA03g060010.3C	A03:31933087-31933949:+	159	9.01	18284.7	54.19	-0.737	Nucleus.	5-141
BraA03g060230.3C	A03:32030982-32034439:-	829	4.86	91316.9	36.8	-0.44	Nucleus.	998-1141
BraA03g060280.3C	A03:32092912-32093809:-	187	7.7	21000.9	47.02	-0.482	Nucleus.	19-153
BraA04g003040.3C	A04:1880701-1882302:+	160	8.42	17874.4	47.37	-0.493	Nucleus.	39-46 595-708
BraA04g004670.3C	A04:2970531-2971630:-	167	5.62	18783.3	39.09	-0.471	Nucleus.	37-172
BraA04g006810.3C	A04:4661259-4662129:+	146	6.51	16576.9	26.4	-0.554	Nucleus.	9-151
BraA04g013920.3C	A04:10835591-10837118:-	186	4.19	21168.6	41.87	-0.668	Cytoplasm.	9-150
BraA04g024250.3C	A04:17657466-17660619:-	865	4.83	95719.3	40.58	-0.289	Nucleus.	10-159
BraA04g031930.3C	A04:21537597-21538718:-	189	4.23	21339.7	47.97	-0.633	Nucleus.	43-132
BraA05g015890.3C	A05:9408968-9410902:-	229	8.33	26542.3	31.27	-0.541	Nucleus.	11-142
BraA05g017410.3C	A05:10486525-10488192:+	325	9.47	37185.8	33.18	-0.362	Nucleus.	625-771
BraA05g017420.3C	A05:10502224-10503538:+	329	8.9	37320.2	34.43	-0.453	Nucleus.	11-142
BraA05g017450.3C	A05:10521374-10523153:+	410	8.9	46159.2	49.97	-0.559	Nucleus.	64-153
BraA05g019010.3C	A05:11930014-11931099:+	175	5.68	19419	55.02	-0.391	Nucleus.	79-202
BraA05g020350.3C	A05:13272554-13273498:+	143	6.73	16405.8	29.92	-0.522	Nucleus.	92-227
BraA05g020820.3C	A05:13816256-13817790:-	161	8.34	18204.7	67.06	-0.503	Nucleus.	147-284
BraA05g021700.3C	A05:15444460-15445353:-	111	8.69	12812.9	58.81	-0.226	Nucleus.	33-168
BraA05g021730.3C	A05:15458368-15459349:-	150	7.8	17207.7	32.77	-0.527	Nucleus.	3-138
BraA05g027210.3C	A05:20418080-20419396:+	181	5.04	20004.7	53.94	-0.385	Nucleus.	19-154
BraA05g031760.3C	A05:23163720-23166288:-	550	4.82	60634.4	46.83	-0.52	Nucleus.	37-110
BraA05g033560.3C	A05:24119011-24120187:+	183	9.04	20286.4	35.61	-0.214	Nucleus.	5-132
BraA05g037590.3C	A05:25875084-25876028:-	148	7.71	16537.1	46.66	-0.374	Nucleus.	10-145
BraA06g000010.3C	A06:12374-13492:-	148	7.71	16551.1	46.66	-0.373	Nucleus.	40-174
BraA06g001610.3C	A06:988337-990477:+	497	6.62	55683.8	46.29	-0.489	Nucleus.	301-447
BraA06g003240.3C	A06:1880629-1881775:+	181	5.17	19962.5	55.66	-0.447	Nucleus.	41-177
BraA06g012760.3C	A06:6761472-6766412:-	696	8.43	78924.1	53.02	0.075	Cytoplasm. Nucleus.	5-141
BraA06g013080.3C	A06:6914817-6916547:-	238	9.23	26791.9	53.33	-0.46	Nucleus.	5-141
BraA06g032910.3C	A06:22541319-22542135:+	157	8.7	17737.5	45.28	-0.275	Nucleus.	234-377
BraA06g039660.3C	A06:26379006-26379905:-	152	5.37	17279.5	72.04	-0.562	Cytoplasm. Nucleus.	40-174
BraA07g004210.3C	A07:3220943-3230568:+	1662	4.87	185257	47.63	-0.814	Nucleus.	8-144
BraA07g004380.3C	A07:3329495-3331603:-	180	4.94	20169.7	51.77	-0.463	Nucleus.	503-518 562-688
BraA07g014230.3C	A07:12999286-13000160:+	123	5.91	14083.2	38.4	-0.582	Nucleus.	9-138
BraA07g020500.3C	A07:17002384-17003685:-	169	4.06	19191.2	35.91	-0.625	Cytoplasm.	7-147
BraA07g022030.3C	A07:17853154-17854004:+	167	5.19	18743.2	33.4	-0.441	Nucleus.	8-144
BraA07g023070.3C	A07:18452197-18453752:-	160	8.42	17843.4	47.37	-0.481	Nucleus.	1416-1549
BraA07g026500.3C	A07:20163791-20165280:-	114	6.83	12749.8	42.73	-0.255	Nucleus.	5-141
BraA07g039000.3C	A07:26738122-26739759:+	161	7.04	18470.1	72.59	-0.466	Nucleus.	8-109
BraA07g041940.3C	A07:28167388-28168950:+	153	6.74	17191.8	51.65	-0.322	Cytoplasm. Nucleus.	4-127
BraA08g001880.3C	A08:1338286-1340631:+	465	8.99	51291	45.14	-0.474	Nucleus.	10-159
BraA08g002950.3C	A08:2198718-2199371:+	128	5.06	14427.3	53.96	-0.408	Nucleus.	9-150
BraA08g019230.3C	A08:15003041-15004911:+	157	6.89	17630.4	40.86	-0.298	Nucleus.	9-42 43-103
BraA08g021270.3C	A08:16122319-16123190:-	185	7.7	20900.8	46.09	-0.47	Nucleus.	8-144
BraA08g026590.3C	A08:18925978-18927362:+	158	5.32	17862.5	41.24	-0.54	Nucleus.	19-154
BraA08g029340.3C	A08:20232146-20234095:+	235	9	26347.4	58.15	-0.477	Nucleus.	9-145
BraA08g030240.3C	A08:20580954-20582339:+	210	8.5	23938.9	88.02	-0.72	Cytoplasm. Nucleus.	201-344
BraA09g005810.3C	A09:3385265-3386065:-	158	8.94	17924.7	46.11	-0.314	Nucleus.	5-123
BraA09g011490.3C	A09:6696713-6697591:-	184	8.8	20808.9	40.57	-0.501	Nucleus.	14-150
BraA09g013680.3C	A09:7991550-7992409:+	148	7.73	16505	45.3	-0.308	Nucleus.	35-170
BraA09g014570.3C	A09:8512356-8519449:-	1606	7.62	182395	39.9	-0.34	Nucleus.	41-136
BraA09g019580.3C	A09:12598700-12599894:-	175	8.32	19965.8	68.2	-0.401	Nucleus.	9-132
BraA09g039910.3C	A09:31214892-31216053:+	156	5.28	17501.1	36.05	-0.48	Nucleus.	66-202
BraA09g043710.3C	A09:33765415-33766623:-	146	6.51	16515.8	24.67	-0.54	Nucleus.	8-144
BraA09g046200.3C	A09:35161312-35162480:+	167	5.2	18872.4	38.8	-0.444	Nucleus.	7-147
BraA09g048460.3C	A09:36428525-36429885:-	160	8.41	17863.4	46.78	-0.501	Nucleus.	34-169
BraA09g057850.3C	A09:41135350-41137196:+	235	8.77	26457.5	55.97	-0.417	Nucleus.	5-141
BraA09g058060.3C	A09:41238628-41239981:+	153	6.74	17205.8	52.91	-0.32	Cytoplasm. Nucleus.	5-145
BraA09g059400.3C	A09:41894339-41895101:+	152	5.34	17281.4	73.6	-0.589	Cytoplasm. Nucleus.	19-168
BraA10g003720.3C	A10:1958263-1959252:+	149	6.03	16877.3	62.28	-0.068	Nucleus.	8-135
BraA10g007240.3C	A10:4359690-4361252:-	122	8.72	13727.7	67.44	-0.415	Nucleus.	39-134
BraA10g011660.3C	A10:9602489-9603589:-	148	7.71	16523.1	49.41	-0.322	Nucleus.	43-132
BraA10g014010.3C	A10:11313333-11314283:+	148	6.82	16589.9	52.27	-0.424	Nucleus.	10-159
BraA10g017170.3C	A10:13004263-13007136:-	172	6.52	19651.4	45.04	-0.566	Nucleus.	9-150
BraA10g028050.3C	A10:18270715-18271871:-	248	8.85	26919.8	37.08	-0.359	Nucleus.	9-132
BraA01g040990.3C	A01:27540848-27542002:+	162	6.06	18399.1	66.99	-0.459	Nucleus.	9-145
BraA02g035770.3C	A02:24827089-24827931:+	143	5.37	16382.4	72.88	-0.706	Nucleus.	8-144
BraA04g000770.3C	A04:470053-471365:+	160	8.39	18172.6	47.43	-0.712	Nucleus.	74-136
BraA05g021720.3C	A05:15453221-15454164:-	137	6.56	15587.9	24.1	-0.283	Nucleus.	15-115
BraA06g010570.3C	A06:5736052-5736865:-	152	5.63	17289.5	67.03	-0.601	Cytoplasm. Nucleus.	5-141
BraA07g034670.3C	A07:24622597-24623423:-	152	5.34	17298.5	75.47	-0.551	Cytoplasm. Nucleus.	5-141
BraA08g030250.3C	A08:20583583-20584399:+	152	5.11	17419.7	66.34	-0.531	Nucleus.	17-164
BraA09g023630.3C	A09:15803895-15804777:+	143	5.37	16392.4	74.09	-0.712	Nucleus.	15-150
BolC1t00251H	C1:1365234-1366138:-	161	8.99	18540.1	58.64	-0.673	Nucleus.	19-155
BolC1t02390H	C1:16172655-16176699:-	637	9.2	71985	37.29	0.088	Nucleus.	494-630
BolC1t02610H	C1:18005198-18007019:+	304	5.32	33623.7	52.08	-0.556	Nucleus.	15-124
BolC1t03368H	C1:27432792-27433182:-	69	8.06	7831.12	43.02	-0.22	Nucleus.	6-59
BolC1t04365H	C1:39986555-39987834:+	181	4.89	20002.6	54.68	-0.403	Nucleus.	40-174
BolC1t04696H	C1:43033696-43035491:-	308	5.13	33921.5	48.25	-0.288	Nucleus.	15-126
BolC1t04873H	C1:44293585-44296286:-	602	4.78	66606.9	44.96	-0.598	Nucleus.	335-479
BolC1t05493H	C1:48612673-48616918:-	501	6.23	55171.8	44.52	-0.369	Cell membrane. Nucleus.	358-494
BolC2t07359H	C2:8883813-8884840:+	182	5.2	20618.6	48.78	-0.314	Nucleus.	9-174
BolC2t07661H	C2:11399875-11400760:-	155	4.97	17636	51.21	-0.05	Nucleus.	6-92 118-148
BolC2t07662H	C2:11401439-11402507:-	160	8.35	17823.5	45.92	-0.255	Nucleus.	17-153
BolC2t07988H	C2:14226398-14227420:+	148	7.71	16537.1	48.11	-0.321	Nucleus.	5-141
BolC2t08845H	C2:23057746-23064386:+	161	4.82	18294.9	40	-0.471	Nucleus.	41-139
BolC2t09510H	C2:29686610-29687259:+	114	4.98	12800.5	57.03	-0.314	Nucleus.	5-72 94-110
BolC2t09607H	C2:30816021-30817326:+	154	6.75	17406	50.09	-0.383	Cytoplasm. Nucleus.	9-146
BolC2t11178H	C2:52005322-52006160:+	152	5.37	17279.5	72.04	-0.562	Cytoplasm. Nucleus.	8-144
BolC2t12287H	C2:61792015-61792947:+	150	5.63	17132.5	75.74	-0.482	Cytoplasm. Nucleus.	8-144
BolC3t12794H	C3:1131506-1134854:-	340	5.61	37375.5	33.02	-0.246	Nucleus.	36-171
BolC3t14034H	C3:7704914-7706605:-	222	9.6	25609.8	52.12	-0.346	Nucleus.	69-215
BolC3t14184H	C3:8608319-8609360:+	188	7.6	21589.1	48.68	-0.073	Nucleus.	5-24 65-181
BolC3t14327H	C3:9549215-9550614:+	260	8.42	29022.4	43.6	-0.13	Nucleus.	54-177
BolC3t14523H	C3:10786820-10787464:-	180	9.46	20208.6	53.42	-0.158	Nucleus.	36-173
BolC3t15385H	C3:16543690-16544841:-	187	4.33	21186.6	48.55	-0.613	Nucleus.	11-142
BolC3t16671H	C3:25665042-25666135:-	148	7.71	16537.1	46.66	-0.374	Nucleus.	5-141
BolC3t17039H	C3:28320910-28329892:+	726	5.86	81524.3	53.53	-0.696	Nucleus.	456-599
BolC3t17649H	C3:33599472-33619309:-	343	6.06	37274	40.81	-0.588	Nucleus.	19-72
BolC3t18025H	C3:36889195-36889998:+	148	7.71	16706.2	38.94	-0.283	Nucleus.	10-159
BolC3t18037H	C3:36975431-36983068:-	1110	4.55	123499	42.18	-0.687	Nucleus.	5-141
BolC3t20237H	C3:61744245-61745191:+	185	7.7	20900.8	46.09	-0.47	Nucleus.	863-1006
BolC3t20467H	C3:63430458-63441631:+	151	4.34	17444.8	29.76	-0.07	Nucleus.	35-170
BolC3t21284H	C3:70645179-70645849:-	135	6.56	15336.4	49.48	-0.45	Nucleus.	96-136
BolC3t21421H	C3:71820950-71823733:-	482	8.64	53301.3	43.24	-0.43	Nucleus.	15-129
BolC4t25013H	C4:34360123-34361811:+	160	8.41	17950.5	44.16	-0.496	Nucleus.	204-347
BolC4t25266H	C4:36704641-36706176:-	194	5.36	21866	40.74	-0.259	Nucleus.	9-151
BolC4t25628H	C4:40200949-40201982:+	165	6.3	18866.6	29.08	-0.406	Nucleus.	9-151
BolC4t26431H	C4:47716049-47717495:-	186	4.2	21156.6	44.03	-0.65	Nucleus.	10-121 142-186
BolC4t27799H	C4:59620770-59623939:-	865	4.85	95601.1	41.64	-0.28	Nucleus.	44-56 77-151
BolC4t28701H	C4:64805531-64806640:-	190	4.22	21452.8	47.74	-0.626	Cytoplasm.	11-142
BolC5t30226H	C5:8361126-8362947:-	153	6.14	17220.9	49.9	-0.319	Cytoplasm. Nucleus.	625-771
BolC5t30274H	C5:8680590-8682186:-	244	9.09	27284.5	53.21	-0.368	Nucleus.	11-142
BolC5t30945H	C5:14021956-14023105:-	159	5.48	18136.9	35	-0.436	Nucleus.	8-144
BolC5t32090H	C5:26467950-26468963:+	175	5.68	19407	55.45	-0.419	Nucleus.	9-145
BolC5t32288H	C5:29217989-29218916:+	100	4.92	11036.7	39.62	-0.261	Nucleus.	9-141
BolC5t32355H	C5:29897932-29899587:-	209	8.92	23331.6	60.68	-0.428	Nucleus.	33-122
BolC5t32449H	C5:31958257-31959671:-	164	9.52	18477.5	40.79	-0.176	Nucleus.	33-168
BolC5t32450H	C5:31961849-31963262:-	164	9.25	18571.7	40.18	-0.153	Nucleus.	8-66 65-85
BolC5t33170H	C5:40265531-40266829:+	183	5.17	20131.8	50.4	-0.363	Nucleus.	56-202
BolC5t33869H	C5:46488617-46491185:-	544	4.86	60110	47.35	-0.497	Nucleus.	21-107
BolC5t34100H	C5:48467524-48468613:+	183	9.06	20280.4	35.31	-0.196	Nucleus.	21-105
BolC6t35251H	C6:1323643-1325349:+	161	7.7	18343.8	60.6	-0.588	Nucleus.	42-176
BolC6t35678H	C6:5838125-5839343:-	181	5.17	19962.5	55.66	-0.447	Nucleus.	296-443
BolC6t35948H	C6:8357988-8360241:-	509	6.17	56839.2	47.21	-0.444	Nucleus.	41-177
BolC6t36615H	C6:15794694-15796510:-	420	8.47	47113.1	47.86	-0.578	Nucleus.	19-154
BolC6t36622H	C6:15868269-15869423:-	168	9.32	19473.2	36.35	-0.512	Nucleus.	40-174
BolC6t36727H	C6:16907992-16912490:+	461	9.65	52253.8	33.11	-0.425	Nucleus.	259-389
BolC6t36729H	C6:16918371-16919609:+	303	8.54	34366	39.35	-0.436	Nucleus.	158-282
BolC6t36845H	C6:17731571-17732478:+	146	6.2	16558.8	20.04	-0.577	Nucleus.	78-162
BolC6t37461H	C6:24285046-24285972:+	186	5.96	21024.8	37.31	-0.446	Nucleus.	78-202
BolC6t37643H	C6:26055285-26056637:-	160	8.42	17843.4	47.37	-0.481	Nucleus.	90-226
BolC6t38200H	C6:30165930-30167528:-	177	5.22	19862.7	51.43	-0.268	Cytoplasm. Nucleus.	43-131
BolC6t39980H	C6:43948780-43950763:+	161	7.04	18455.1	75.08	-0.488	Nucleus.	10-119 138-178
BolC6t40294H	C6:45682973-45684723:+	180	5.49	20204.1	54.47	-0.289	Cytoplasm. Nucleus.	9-150
BolC7t41090H	C7:9887693-9897826:+	1706	4.89	190134	47.01	-0.714	Nucleus.	20-169
BolC7t41105H	C7:10087453-10088314:-	148	7.66	16728.3	50.03	-0.258	Nucleus.	19-154
BolC7t42573H	C7:28085939-28086840:+	161	5.5	18342	34.26	-0.568	Nucleus.	9-172
BolC7t43846H	C7:39780279-39781178:+	152	5.37	17279.5	72.04	-0.562	Cytoplasm. Nucleus.	1478-1593
BolC7t44745H	C7:46315399-46316130:-	155	8.72	17478.2	44.98	-0.268	Nucleus.	5-141
BolC7t46593H	C7:57159425-57160267:+	161	9.13	18548.1	51.72	-0.775	Nucleus.	41-131
BolC7t46613H	C7:57239602-57240068:-	120	7.81	13465.2	28.81	-0.408	Nucleus.	8-144
BolC8t48730H	C8:24614234-24621262:-	648	9.26	72682.7	34.25	0.109	Nucleus.	5-145
BolC8t49289H	C8:28269633-28272515:-	307	6.34	34885.3	70.27	-0.572	Nucleus.	19-156
BolC8t49385H	C8:28828219-28829738:-	172	8.65	19327.5	45.97	-0.2	Cytoplasm. Nucleus.	47-96
BolC8t49407H	C8:28921009-28922964:-	245	9.47	27382.9	52.98	-0.392	Nucleus.	505-641
BolC8t49820H	C8:31914408-31915829:-	169	5.53	19084	39.29	-0.473	Nucleus.	8-145 183-304
BolC8t50400H	C8:36455903-36456992:-	157	6.51	17709.2	31.61	-0.429	Nucleus.	23-164
BolC8t50676H	C8:38347239-38348556:+	203	5.18	22905.1	32.44	-0.186	Nucleus.	9-141
BolC8t50942H	C8:40123728-40125119:-	160	8.41	17821.3	47.85	-0.517	Nucleus.	41-130
BolC8t51946H	C8:45860111-45862096:+	238	8.74	26724.8	55.37	-0.445	Nucleus.	62-143
BolC8t51967H	C8:45991102-45992496:+	162	6.74	18031.9	45.64	-0.151	Cytoplasm. Nucleus.	10-121 149-195
BolC9t53393H	C9:2903536-2904174:-	107	6.25	11998.7	48.72	-0.322	Nucleus.	9-150
BolC9t53594H	C9:4027391-4028700:-	199	8.62	22352.7	48.25	-0.197	Nucleus.	9-132
BolC9t54310H	C9:9198711-9200062:-	257	9.37	29618.8	46.77	-0.696	Nucleus.	31-154
BolC9t54610H	C9:11633593-11635396:+	276	8.55	30136.1	45.54	-0.024	Nucleus.	517-653
BolC9t54697H	C9:12397406-12398392:-	159	8.4	18041.8	45.93	-0.334	Nucleus.	5-68
BolC9t55455H	C9:19648874-19650352:-	251	8.92	28750.7	63.35	-0.38	Nucleus.	49-189
BolC9t57185H	C9:41394164-41396739:-	267	9.79	30077.7	50.06	-0.482	Nucleus.	57-79 107-242
BolC9t57588H	C9:45090262-45091239:+	148	6.81	16557.9	49.67	-0.395	Nucleus.	5-167
BolC9t58017H	C9:48988892-48991081:-	179	5.78	20380	42.58	-0.422	Nucleus.	12-152
BolC9t59922H	C9:61501932-61502751:+	188	9.7	20422.5	34.22	-0.337	Nucleus.	95-244
BolC3t17653H	C3:33624839-33626737:-	431	6	46824.6	40.28	-0.539	Nucleus.	5-144
BolC4t24594H	C4:30278699-30280097:+	160	8.39	18158.5	47.43	-0.709	Nucleus.	5-141
BolC5t29974H	C5:6757216-6758046:-	152	5.63	17289.5	67.03	-0.601	Cytoplasm. Nucleus.	28-171
BolC8t52129H	C8:46813851-46817502:+	661	6.29	74182.2	40.37	-0.34	Cytoplasm. Nucleus.	2-90
