# Supplementary material for: Genome-wide characterization of ubiquitin-conjugating enzyme gene family explores its genetic effects on the oil content and yield of Brassica napus
Source: Front Plant Sci. 2023 Mar 20;14:1118339. doi: 10.3389/fpls.2023.1118339 (PMC10067767; doi:10.3389/fpls.2023.1118339)
Supplement: Supplementary file 8 [file Table_3.xlsx]

## Sheet: Sheet1
Table S3. Genomic positions of BnUBCs.
chrA01	GazeA2	mRNA	671836	672911	215.745	-	.	ID=BnaA01g01300D;Name=BnaA01g01300D
chrA01	GazeA2	UTR	672857	672911	1.5816	-	.	Parent=BnaA01g01300D
chrA01	GazeA2	CDS	672827	672856	24.19	-	0	Parent=BnaA01g01300D
chrA01	GazeA2	CDS	672627	672730	15.964	-	0	Parent=BnaA01g01300D
chrA01	GazeA2	CDS	672432	672534	16.0723	-	2	Parent=BnaA01g01300D
chrA01	GazeA2	CDS	672286	672349	15.9723	-	0	Parent=BnaA01g01300D
chrA01	GazeA2	CDS	672105	672193	15.9908	-	1	Parent=BnaA01g01300D
chrA01	GazeA2	CDS	671927	672022	25.1525	-	0	Parent=BnaA01g01300D
chrA01	GazeA2	UTR	671836	671926	0.8919	-	.	Parent=BnaA01g01300D
chrA01	GazeA2	mRNA	6638482	6638872	35.5807	+	.	ID=BnaA01g13200D;Name=BnaA01g13200D
chrA01	GazeA2	CDS	6638482	6638511	12.5291	+	0	Parent=BnaA01g13200D
chrA01	GazeA2	CDS	6638608	6638724	0.3939	+	0	Parent=BnaA01g13200D
chrA01	GazeA2	CDS	6638810	6638872	0.6872	+	0	Parent=BnaA01g13200D
chrA01	GazeA2	mRNA	8780941	8786012	367.59	-	.	ID=BnaA01g16780D;Name=BnaA01g16780D
chrA01	GazeA2	UTR	8785852	8786012	2.852	-	.	Parent=BnaA01g16780D
chrA01	GazeA2	UTR	8785725	8785748	-0.3873	-	.	Parent=BnaA01g16780D
chrA01	GazeA2	CDS	8785353	8785724	28.9	-	0	Parent=BnaA01g16780D
chrA01	GazeA2	CDS	8784282	8785052	16.6955	-	0	Parent=BnaA01g16780D
chrA01	GazeA2	CDS	8784147	8784178	11.1	-	0	Parent=BnaA01g16780D
chrA01	GazeA2	CDS	8783778	8784060	26.9672	-	2	Parent=BnaA01g16780D
chrA01	GazeA2	CDS	8782166	8782244	45.6	-	0	Parent=BnaA01g16780D
chrA01	GazeA2	CDS	8781677	8781804	25.3057	-	1	Parent=BnaA01g16780D
chrA01	GazeA2	CDS	8781475	8781579	33.6	-	0	Parent=BnaA01g16780D
chrA01	GazeA2	CDS	8781208	8781351	30.8056	-	0	Parent=BnaA01g16780D
chrA01	GazeA2	UTR	8780941	8781207	8.9704	-	.	Parent=BnaA01g16780D
chrA01	GazeA2	mRNA	9282575	9284696	265.805	+	.	ID=BnaA01g17560D;Name=BnaA01g17560D
chrA01	GazeA2	UTR	9284404	9284696	11.6556	+	.	Parent=BnaA01g17560D
chrA01	GazeA2	CDS	9283981	9284403	32.8826	+	0	Parent=BnaA01g17560D
chrA01	GazeA2	CDS	9283312	9283475	32.6084	+	1	Parent=BnaA01g17560D
chrA01	GazeA2	CDS	9283140	9283224	21.5651	+	0	Parent=BnaA01g17560D
chrA01	GazeA2	CDS	9282922	9283053	27.4783	+	0	Parent=BnaA01g17560D
chrA01	GazeA2	CDS	9282652	9282762	30.2583	+	0	Parent=BnaA01g17560D
chrA01	GazeA2	UTR	9282575	9282651	1.6071	+	.	Parent=BnaA01g17560D
chrA01	GazeA2	mRNA	17894249	17895875	248.246	+	.	ID=BnaA01g25670D;Name=BnaA01g25670D
chrA01	GazeA2	UTR	17895662	17895875	4.5347	+	.	Parent=BnaA01g25670D
chrA01	GazeA2	CDS	17895615	17895661	28.3467	+	1	Parent=BnaA01g25670D
chrA01	GazeA2	CDS	17895452	17895511	23.0137	+	1	Parent=BnaA01g25670D
chrA01	GazeA2	CDS	17895296	17895359	22.8502	+	0	Parent=BnaA01g25670D
chrA01	GazeA2	CDS	17894950	17895177	22.9	+	0	Parent=BnaA01g25670D
chrA01	GazeA2	CDS	17894827	17894854	17.1	+	2	Parent=BnaA01g25670D
chrA01	GazeA2	CDS	17894345	17894463	28.8743	+	0	Parent=BnaA01g25670D
chrA01	GazeA2	UTR	17894249	17894344	0.8293	+	.	Parent=BnaA01g25670D
chrA01	GazeA2	mRNA	19201662	19204005	251.257	-	.	ID=BnaA01g27470D;Name=BnaA01g27470D
chrA01	GazeA2	UTR	19203973	19204005	0.036	-	.	Parent=BnaA01g27470D
chrA01	GazeA2	CDS	19203862	19203972	32.0914	-	0	Parent=BnaA01g27470D
chrA01	GazeA2	CDS	19203531	19203662	21.4696	-	0	Parent=BnaA01g27470D
chrA01	GazeA2	CDS	19203001	19203085	21.4615	-	0	Parent=BnaA01g27470D
chrA01	GazeA2	CDS	19202762	19202925	31.4621	-	1	Parent=BnaA01g27470D
chrA01	GazeA2	CDS	19201931	19202365	32.249	-	0	Parent=BnaA01g27470D
chrA01	GazeA2	UTR	19201662	19201930	4.8509	-	.	Parent=BnaA01g27470D
chrA01	GazeA2	mRNA	20018444	20021359	350.907	+	.	ID=BnaA01g28850D;Name=BnaA01g28850D
chrA01	GazeA2	UTR	20021138	20021359	0.5874	+	.	Parent=BnaA01g28850D
chrA01	GazeA2	CDS	20020826	20021137	31.5447	+	0	Parent=BnaA01g28850D
chrA01	GazeA2	CDS	20020430	20020741	21.3376	+	0	Parent=BnaA01g28850D
chrA01	GazeA2	CDS	20020194	20020333	19.6677	+	1	Parent=BnaA01g28850D
chrA01	GazeA2	CDS	20020053	20020116	24.4044	+	0	Parent=BnaA01g28850D
chrA01	GazeA2	CDS	20019148	20019963	38.7059	+	0	Parent=BnaA01g28850D
chrA01	GazeA2	CDS	20018966	20019067	31.632	+	0	Parent=BnaA01g28850D
chrA01	GazeA2	CDS	20018556	20018606	27.5716	+	0	Parent=BnaA01g28850D
chrA01	GazeA2	UTR	20018444	20018555	2.6417	+	.	Parent=BnaA01g28850D
chrA01	GazeA2	mRNA	21770966	21772613	224.488	-	.	ID=BnaA01g32320D;Name=BnaA01g32320D
chrA01	GazeA2	UTR	21772439	21772613	5.6333	-	.	Parent=BnaA01g32320D
chrA01	GazeA2	UTR	21772322	21772330	0.8477	-	.	Parent=BnaA01g32320D
chrA01	GazeA2	CDS	21772252	21772321	38.4038	-	0	Parent=BnaA01g32320D
chrA01	GazeA2	CDS	21771633	21771760	21.5258	-	1	Parent=BnaA01g32320D
chrA01	GazeA2	CDS	21771426	21771530	27.5741	-	0	Parent=BnaA01g32320D
chrA01	GazeA2	CDS	21771186	21771329	31.01	-	0	Parent=BnaA01g32320D
chrA01	GazeA2	UTR	21770966	21771185	8.6278	-	.	Parent=BnaA01g32320D
chrA02	GazeA2	mRNA	3393966	3395451	220.08	+	.	ID=BnaA02g07130D;Name=BnaA02g07130D
chrA02	GazeA2	UTR	3393966	3394100	5.0303	+	.	Parent=BnaA02g07130D
chrA02	GazeA2	CDS	3394101	3394166	18.7754	+	0	Parent=BnaA02g07130D
chrA02	GazeA2	CDS	3394236	3394327	13.3261	+	0	Parent=BnaA02g07130D
chrA02	GazeA2	CDS	3394494	3394591	16.9115	+	2	Parent=BnaA02g07130D
chrA02	GazeA2	CDS	3394683	3394783	17.1	+	1	Parent=BnaA02g07130D
chrA02	GazeA2	CDS	3394890	3394967	23.1	+	0	Parent=BnaA02g07130D
chrA02	GazeA2	CDS	3395047	3395124	28.85	+	0	Parent=BnaA02g07130D
chrA02	GazeA2	UTR	3395125	3395451	6.084	+	.	Parent=BnaA02g07130D
chrA02	GazeA2	mRNA	5261109	5262667	249.528	+	.	ID=BnaA02g10330D;Name=BnaA02g10330D
chrA02	GazeA2	UTR	5261109	5261375	16.737	+	.	Parent=BnaA02g10330D
chrA02	GazeA2	CDS	5261376	5261445	38.0792	+	0	Parent=BnaA02g10330D
chrA02	GazeA2	CDS	5261612	5261739	37.6495	+	1	Parent=BnaA02g10330D
chrA02	GazeA2	CDS	5261849	5261953	33.408	+	0	Parent=BnaA02g10330D
chrA02	GazeA2	CDS	5262232	5262375	30.2775	+	0	Parent=BnaA02g10330D
chrA02	GazeA2	UTR	5262376	5262667	12.5343	+	.	Parent=BnaA02g10330D
chrA02	GazeA2	mRNA	8657064	8658372	124.197	+	.	ID=BnaA02g15070D;Name=BnaA02g15070D
chrA02	GazeA2	CDS	8658314	8658372	15.9236	+	1	Parent=BnaA02g15070D
chrA02	GazeA2	CDS	8657907	8658033	4.059	+	0	Parent=BnaA02g15070D
chrA02	GazeA2	CDS	8657674	8657799	17.1827	+	0	Parent=BnaA02g15070D
chrA02	GazeA2	CDS	8657220	8657359	9.6396	+	1	Parent=BnaA02g15070D
chrA02	GazeA2	CDS	8657064	8657091	15.6396	+	0	Parent=BnaA02g15070D
chrA02	GazeA2	mRNA	11768155	11769736	360.701	+	.	ID=BnaA02g19070D;Name=BnaA02g19070D
chrA02	GazeA2	UTR	11768155	11768285	6.0622	+	.	Parent=BnaA02g19070D
chrA02	GazeA2	CDS	11768286	11768321	28.519	+	0	Parent=BnaA02g19070D
chrA02	GazeA2	CDS	11768398	11768425	27.6	+	0	Parent=BnaA02g19070D
chrA02	GazeA2	CDS	11768525	11768587	1.5774	+	1	Parent=BnaA02g19070D
chrA02	GazeA2	CDS	11768719	11768777	12.0009	+	1	Parent=BnaA02g19070D
chrA02	GazeA2	CDS	11769026	11769067	21.6	+	0	Parent=BnaA02g19070D
chrA02	GazeA2	CDS	11769156	11769229	27.214	+	0	Parent=BnaA02g19070D
chrA02	GazeA2	CDS	11769323	11769420	27.4961	+	2	Parent=BnaA02g19070D
chrA02	GazeA2	CDS	11769521	11769558	30.0343	+	1	Parent=BnaA02g19070D
chrA02	GazeA2	UTR	11769559	11769736	5.782	+	.	Parent=BnaA02g19070D
chrA02	GazeA2	mRNA	19590818	19592379	262.071	+	.	ID=BnaA02g26550D;Name=BnaA02g26550D
chrA02	GazeA2	UTR	19592151	19592379	4.2616	+	.	Parent=BnaA02g26550D
chrA02	GazeA2	CDS	19592022	19592150	30.7454	+	0	Parent=BnaA02g26550D
chrA02	GazeA2	CDS	19591810	19591898	27.6	+	1	Parent=BnaA02g26550D
chrA02	GazeA2	CDS	19591628	19591717	21.6	+	1	Parent=BnaA02g26550D
chrA02	GazeA2	CDS	19591517	19591542	21.6	+	2	Parent=BnaA02g26550D
chrA02	GazeA2	CDS	19591309	19591433	33.0191	+	0	Parent=BnaA02g26550D
chrA02	GazeA2	UTR	19591303	19591308	-0.5003	+	.	Parent=BnaA02g26550D
chrA02	GazeA2	UTR	19590818	19591010	5.8093	+	.	Parent=BnaA02g26550D
chrA02	GazeA2	mRNA	24000200	24001647	260.712	+	.	ID=BnaA02g33480D;Name=BnaA02g33480D
chrA02	GazeA2	UTR	24000200	24000329	5.8933	+	.	Parent=BnaA02g33480D
chrA02	GazeA2	UTR	24000575	24000598	0.1275	+	.	Parent=BnaA02g33480D
chrA02	GazeA2	CDS	24000599	24000723	31.8882	+	0	Parent=BnaA02g33480D
chrA02	GazeA2	CDS	24000818	24000843	21.6	+	2	Parent=BnaA02g33480D
chrA02	GazeA2	CDS	24000927	24001016	21.4128	+	1	Parent=BnaA02g33480D
chrA02	GazeA2	CDS	24001235	24001323	27.1105	+	1	Parent=BnaA02g33480D
chrA02	GazeA2	CDS	24001409	24001531	33.4068	+	0	Parent=BnaA02g33480D
chrA02	GazeA2	UTR	24001532	24001647	1.3564	+	.	Parent=BnaA02g33480D
chrA03	GazeA2	mRNA	4983062	4985045	237.515	-	.	ID=BnaA03g11080D;Name=BnaA03g11080D
chrA03	GazeA2	CDS	4984986	4985045	14.9446	-	0	Parent=BnaA03g11080D
chrA03	GazeA2	CDS	4984780	4984895	6.7835	-	0	Parent=BnaA03g11080D
chrA03	GazeA2	CDS	4984519	4984528	5.7835	-	2	Parent=BnaA03g11080D
chrA03	GazeA2	CDS	4984414	4984504	28.5121	-	0	Parent=BnaA03g11080D
chrA03	GazeA2	CDS	4984065	4984192	27.4965	-	1	Parent=BnaA03g11080D
chrA03	GazeA2	CDS	4983836	4983940	27.048	-	0	Parent=BnaA03g11080D
chrA03	GazeA2	CDS	4983301	4983444	29.8375	-	0	Parent=BnaA03g11080D
chrA03	GazeA2	UTR	4983062	4983300	8.2133	-	.	Parent=BnaA03g11080D
chrA03	GazeA2	mRNA	5591785	5593248	226.876	+	.	ID=BnaA03g12310D;Name=BnaA03g12310D
chrA03	GazeA2	UTR	5592992	5593248	4.243	+	.	Parent=BnaA03g12310D
chrA03	GazeA2	CDS	5592848	5592991	30.5862	+	0	Parent=BnaA03g12310D
chrA03	GazeA2	CDS	5592499	5592603	27.4043	+	0	Parent=BnaA03g12310D
chrA03	GazeA2	CDS	5592300	5592427	30.2657	+	1	Parent=BnaA03g12310D
chrA03	GazeA2	CDS	5592009	5592078	37.3362	+	0	Parent=BnaA03g12310D
chrA03	GazeA2	UTR	5591990	5592008	0.2544	+	.	Parent=BnaA03g12310D
chrA03	GazeA2	UTR	5591785	5591892	5.8553	+	.	Parent=BnaA03g12310D
chrA03	GazeA2	mRNA	6125482	6127190	260.664	+	.	ID=BnaA03g13470D;Name=BnaA03g13470D
chrA03	GazeA2	UTR	6126932	6127190	5.0065	+	.	Parent=BnaA03g13470D
chrA03	GazeA2	CDS	6126824	6126931	31.1286	+	0	Parent=BnaA03g13470D
chrA03	GazeA2	CDS	6126652	6126735	33.3657	+	0	Parent=BnaA03g13470D
chrA03	GazeA2	CDS	6126401	6126560	26.5825	+	2	Parent=BnaA03g13470D
chrA03	GazeA2	CDS	6126016	6126064	27.6	+	1	Parent=BnaA03g13470D
chrA03	GazeA2	CDS	6125616	6125793	29.9276	+	0	Parent=BnaA03g13470D
chrA03	GazeA2	UTR	6125482	6125615	-0.7369	+	.	Parent=BnaA03g13470D
chrA03	GazeA2	mRNA	6964629	6965584	79.3299	-	.	ID=BnaA03g15110D;Name=BnaA03g15110D
chrA03	GazeA2	UTR	6965485	6965584	0.3183	-	.	Parent=BnaA03g15110D
chrA03	GazeA2	CDS	6965173	6965484	28.3219	-	0	Parent=BnaA03g15110D
chrA03	GazeA2	CDS	6964839	6965069	28.762	-	0	Parent=BnaA03g15110D
chrA03	GazeA2	UTR	6964629	6964838	1.9475	-	.	Parent=BnaA03g15110D
chrA03	GazeA2	mRNA	10096997	10098375	219.01	-	.	ID=BnaA03g21240D;Name=BnaA03g21240D
chrA03	GazeA2	UTR	10098262	10098375	4.6615	-	.	Parent=BnaA03g21240D
chrA03	GazeA2	CDS	10098218	10098261	24.1548	-	0	Parent=BnaA03g21240D
chrA03	GazeA2	CDS	10097989	10098068	17.9631	-	2	Parent=BnaA03g21240D
chrA03	GazeA2	CDS	10097716	10097830	13.372	-	1	Parent=BnaA03g21240D
chrA03	GazeA2	CDS	10097597	10097649	15.8938	-	2	Parent=BnaA03g21240D
chrA03	GazeA2	CDS	10097380	10097508	13.3072	-	1	Parent=BnaA03g21240D
chrA03	GazeA2	CDS	10097150	10097292	25.2705	-	1	Parent=BnaA03g21240D
chrA03	GazeA2	UTR	10096997	10097149	4.499	-	.	Parent=BnaA03g21240D
chrA03	GazeA2	mRNA	15024995	15026497	237.801	-	.	ID=BnaA03g31080D;Name=BnaA03g31080D
chrA03	GazeA2	UTR	15026425	15026497	5.9693	-	.	Parent=BnaA03g31080D
chrA03	GazeA2	UTR	15026326	15026346	1.6087	-	.	Parent=BnaA03g31080D
chrA03	GazeA2	CDS	15026256	15026325	37.1769	-	0	Parent=BnaA03g31080D
chrA03	GazeA2	CDS	15025669	15025796	27.6	-	1	Parent=BnaA03g31080D
chrA03	GazeA2	CDS	15025472	15025576	33.6	-	0	Parent=BnaA03g31080D
chrA03	GazeA2	CDS	15025244	15025387	31.0343	-	0	Parent=BnaA03g31080D
chrA03	GazeA2	UTR	15024995	15025243	9.9127	-	.	Parent=BnaA03g31080D
chrA03	GazeA2	mRNA	16378799	16381250	218.532	+	.	ID=BnaA03g33820D;Name=BnaA03g33820D
chrA03	GazeA2	CDS	16381128	16381250	23	+	0	Parent=BnaA03g33820D
chrA03	GazeA2	CDS	16380930	16381028	11.0308	+	0	Parent=BnaA03g33820D
chrA03	GazeA2	CDS	16380511	16380822	11.1	+	0	Parent=BnaA03g33820D
chrA03	GazeA2	CDS	16380291	16380430	11.1	+	1	Parent=BnaA03g33820D
chrA03	GazeA2	CDS	16380146	16380209	11.1	+	0	Parent=BnaA03g33820D
chrA03	GazeA2	CDS	16379950	16380062	12.4139	+	1	Parent=BnaA03g33820D
chrA03	GazeA2	CDS	16379707	16379889	6.6081	+	1	Parent=BnaA03g33820D
chrA03	GazeA2	CDS	16379433	16379616	6.6081	+	0	Parent=BnaA03g33820D
chrA03	GazeA2	CDS	16379180	16379299	23.1	+	0	Parent=BnaA03g33820D
chrA03	GazeA2	CDS	16378799	16378840	18.7081	+	0	Parent=BnaA03g33820D
chrA03	GazeA2	mRNA	19584138	19585096	144.614	+	.	ID=BnaA03g39290D;Name=BnaA03g39290D
chrA03	GazeA2	UTR	19584934	19585096	1.1558	+	.	Parent=BnaA03g39290D
chrA03	GazeA2	CDS	19584790	19584933	24.8208	+	0	Parent=BnaA03g39290D
chrA03	GazeA2	CDS	19584577	19584681	15.3951	+	0	Parent=BnaA03g39290D
chrA03	GazeA2	CDS	19584334	19584461	16.9255	+	1	Parent=BnaA03g39290D
chrA03	GazeA2	CDS	19584138	19584207	26.3922	+	0	Parent=BnaA03g39290D
chrA03	GazeA2	mRNA	19632399	19639322	400.149	-	.	ID=BnaA03g39410D;Name=BnaA03g39410D
chrA03	GazeA2	CDS	19639252	19639322	-0.9	-	0	Parent=BnaA03g39410D
chrA03	GazeA2	CDS	19639094	19639193	-1	-	2	Parent=BnaA03g39410D
chrA03	GazeA2	CDS	19638655	19638750	11	-	0	Parent=BnaA03g39410D
chrA03	GazeA2	CDS	19638405	19638548	11.1	-	0	Parent=BnaA03g39410D
chrA03	GazeA2	CDS	19638225	19638319	11.1	-	0	Parent=BnaA03g39410D
chrA03	GazeA2	CDS	19638077	19638152	10.8893	-	2	Parent=BnaA03g39410D
chrA03	GazeA2	CDS	19634724	19636634	36.7488	-	0	Parent=BnaA03g39410D
chrA03	GazeA2	CDS	19634270	19634395	17.0173	-	0	Parent=BnaA03g39410D
chrA03	GazeA2	CDS	19633926	19634166	10.9817	-	0	Parent=BnaA03g39410D
chrA03	GazeA2	CDS	19633735	19633829	17.4363	-	1	Parent=BnaA03g39410D
chrA03	GazeA2	CDS	19633552	19633621	17.1	-	0	Parent=BnaA03g39410D
chrA03	GazeA2	CDS	19633321	19633460	19.2676	-	1	Parent=BnaA03g39410D
chrA03	GazeA2	CDS	19633170	19633229	11	-	0	Parent=BnaA03g39410D
chrA03	GazeA2	CDS	19632918	19633073	16.958	-	0	Parent=BnaA03g39410D
chrA03	GazeA2	CDS	19632556	19632813	26.8301	-	0	Parent=BnaA03g39410D
chrA03	GazeA2	UTR	19632399	19632555	1.5783	-	.	Parent=BnaA03g39410D
chrA03	GazeA2	mRNA	28144299	28150347	279.288	-	.	ID=BnaA03g53560D;Name=BnaA03g53560D
chrA03	GazeA2	UTR	28144299	28144664	0.0802	-	.	Parent=BnaA03g53560D
chrA03	GazeA2	CDS	28144665	28144895	23.1	-	0	Parent=BnaA03g53560D
chrA03	GazeA2	CDS	28144962	28145273	10.9	-	0	Parent=BnaA03g53560D
chrA03	GazeA2	CDS	28145350	28145489	21.4203	-	1	Parent=BnaA03g53560D
chrA03	GazeA2	CDS	28145562	28145631	16.9	-	0	Parent=BnaA03g53560D
chrA03	GazeA2	CDS	28145706	28145924	17.1	-	0	Parent=BnaA03g53560D
chrA03	GazeA2	CDS	28146064	28146204	17.1	-	0	Parent=BnaA03g53560D
chrA03	GazeA2	CDS	28146778	28147385	8.1336	-	1	Parent=BnaA03g53560D
chrA03	GazeA2	CDS	28148013	28148098	-1	-	2	Parent=BnaA03g53560D
chrA03	GazeA2	CDS	28148249	28148329	11.0293	-	2	Parent=BnaA03g53560D
chrA03	GazeA2	CDS	28148364	28148395	11	-	0	Parent=BnaA03g53560D
chrA03	GazeA2	CDS	28149669	28149738	10.8644	-	2	Parent=BnaA03g53560D
chrA03	GazeA2	CDS	28149782	28149810	-1	-	0	Parent=BnaA03g53560D
chrA03	GazeA2	UTR	28149811	28150347	2.468	-	.	Parent=BnaA03g53560D
chrA03_random	GazeA2	mRNA	162276	165336	307.942	-	.	ID=BnaA03g55110D;Name=BnaA03g55110D
chrA03_random	GazeA2	CDS	162276	162320	19.6392	-	0	Parent=BnaA03g55110D
chrA03_random	GazeA2	CDS	162407	162586	7.7392	-	0	Parent=BnaA03g55110D
chrA03_random	GazeA2	CDS	163512	163803	17.0776	-	2	Parent=BnaA03g55110D
chrA03_random	GazeA2	CDS	163901	164004	33.6	-	0	Parent=BnaA03g55110D
chrA03_random	GazeA2	CDS	164100	164212	27.7439	-	1	Parent=BnaA03g55110D
chrA03_random	GazeA2	CDS	164292	164369	21.6	-	1	Parent=BnaA03g55110D
chrA03_random	GazeA2	CDS	164454	164598	18.7766	-	0	Parent=BnaA03g55110D
chrA03_random	GazeA2	CDS	164690	164713	0.5	-	0	Parent=BnaA03g55110D
chrA03_random	GazeA2	UTR	164714	164785	5.6907	-	.	Parent=BnaA03g55110D
chrA03_random	GazeA2	UTR	164991	165038	7	-	.	Parent=BnaA03g55110D
chrA03_random	GazeA2	UTR	165233	165336	5.928	-	.	Parent=BnaA03g55110D
chrA04	GazeA2	mRNA	1403708	1405865	291.403	+	.	ID=BnaA04g02190D;Name=BnaA04g02190D
chrA04	GazeA2	UTR	1405362	1405865	10.392	+	.	Parent=BnaA04g02190D
chrA04	GazeA2	CDS	1405299	1405361	35.1686	+	0	Parent=BnaA04g02190D
chrA04	GazeA2	CDS	1405092	1405205	37.8263	+	0	Parent=BnaA04g02190D
chrA04	GazeA2	CDS	1404851	1405003	37.9	+	0	Parent=BnaA04g02190D
chrA04	GazeA2	CDS	1403932	1404015	27.4804	+	0	Parent=BnaA04g02190D
chrA04	GazeA2	CDS	1403764	1403832	33.3776	+	0	Parent=BnaA04g02190D
chrA04	GazeA2	UTR	1403708	1403763	1.6212	+	.	Parent=BnaA04g02190D
chrA04	GazeA2	mRNA	2476232	2477693	258.839	-	.	ID=BnaA04g03650D;Name=BnaA04g03650D
chrA04	GazeA2	UTR	2476232	2476558	4.4726	-	.	Parent=BnaA04g03650D
chrA04	GazeA2	CDS	2476559	2476714	31.0609	-	0	Parent=BnaA04g03650D
chrA04	GazeA2	CDS	2476819	2476919	21.6	-	1	Parent=BnaA04g03650D
chrA04	GazeA2	CDS	2477009	2477106	27.4115	-	2	Parent=BnaA04g03650D
chrA04	GazeA2	CDS	2477365	2477467	31.8698	-	1	Parent=BnaA04g03650D
chrA04	GazeA2	CDS	2477613	2477658	33.4723	-	0	Parent=BnaA04g03650D
chrA04	GazeA2	UTR	2477659	2477693	1.1049	-	.	Parent=BnaA04g03650D
chrA04	GazeA2	mRNA	4123043	4124379	209.589	+	.	ID=BnaA04g05360D;Name=BnaA04g05360D
chrA04	GazeA2	UTR	4123975	4124379	5.2111	+	.	Parent=BnaA04g05360D
chrA04	GazeA2	CDS	4123834	4123974	29.4968	+	0	Parent=BnaA04g05360D
chrA04	GazeA2	CDS	4123633	4123758	21.4881	+	0	Parent=BnaA04g05360D
chrA04	GazeA2	CDS	4123353	4123492	38.4629	+	1	Parent=BnaA04g05360D
chrA04	GazeA2	CDS	4123113	4123146	29.4347	+	0	Parent=BnaA04g05360D
chrA04	GazeA2	UTR	4123043	4123112	4.6004	+	.	Parent=BnaA04g05360D
chrA04	GazeA2	mRNA	9604910	9606802	320.409	-	.	ID=BnaA04g11090D;Name=BnaA04g11090D
chrA04	GazeA2	UTR	9606665	9606802	10.2544	-	.	Parent=BnaA04g11090D
chrA04	GazeA2	CDS	9606621	9606664	28.5277	-	0	Parent=BnaA04g11090D
chrA04	GazeA2	CDS	9606430	9606509	27.6627	-	2	Parent=BnaA04g11090D
chrA04	GazeA2	CDS	9606116	9606230	27.6	-	1	Parent=BnaA04g11090D
chrA04	GazeA2	CDS	9605984	9606036	27.6	-	2	Parent=BnaA04g11090D
chrA04	GazeA2	CDS	9605760	9605888	24.7283	-	1	Parent=BnaA04g11090D
chrA04	GazeA2	CDS	9605136	9605275	30.9103	-	1	Parent=BnaA04g11090D
chrA04	GazeA2	UTR	9604910	9605135	8.4078	-	.	Parent=BnaA04g11090D
chrA04	GazeA2	mRNA	15424506	15429219	411.579	-	.	ID=BnaA04g19750D;Name=BnaA04g19750D
chrA04	GazeA2	UTR	15428981	15429219	5.5439	-	.	Parent=BnaA04g19750D
chrA04	GazeA2	UTR	15427772	15428371	9.0667	-	.	Parent=BnaA04g19750D
chrA04	GazeA2	UTR	15427678	15427689	-0.2928	-	.	Parent=BnaA04g19750D
chrA04	GazeA2	CDS	15426376	15427677	33.2315	-	0	Parent=BnaA04g19750D
chrA04	GazeA2	CDS	15426139	15426276	27.4065	-	0	Parent=BnaA04g19750D
chrA04	GazeA2	CDS	15425628	15426035	31.3563	-	0	Parent=BnaA04g19750D
chrA04	GazeA2	CDS	15425482	15425545	27.6	-	0	Parent=BnaA04g19750D
chrA04	GazeA2	CDS	15425256	15425395	27.378	-	1	Parent=BnaA04g19750D
chrA04	GazeA2	CDS	15424858	15425169	37.342	-	0	Parent=BnaA04g19750D
chrA04	GazeA2	CDS	15424551	15424784	31.1271	-	0	Parent=BnaA04g19750D
chrA04	GazeA2	UTR	15424506	15424550	-0.0614	-	.	Parent=BnaA04g19750D
chrA04	GazeA2	mRNA	18823029	18824390	311.853	-	.	ID=BnaA04g26620D;Name=BnaA04g26620D
chrA04	GazeA2	UTR	18823029	18823182	2.6934	-	.	Parent=BnaA04g26620D
chrA04	GazeA2	CDS	18823183	18823331	30.9083	-	1	Parent=BnaA04g26620D
chrA04	GazeA2	CDS	18823425	18823553	27.6	-	1	Parent=BnaA04g26620D
chrA04	GazeA2	CDS	18823624	18823676	21.5	-	2	Parent=BnaA04g26620D
chrA04	GazeA2	CDS	18823760	18823874	33.3571	-	1	Parent=BnaA04g26620D
chrA04	GazeA2	CDS	18824065	18824144	25.202	-	2	Parent=BnaA04g26620D
chrA04	GazeA2	CDS	18824255	18824298	32.8418	-	0	Parent=BnaA04g26620D
chrA04	GazeA2	UTR	18824299	18824390	2.8622	-	.	Parent=BnaA04g26620D
chrA05	GazeA2	mRNA	8181309	8182567	211.248	-	.	ID=BnaA05g13430D;Name=BnaA05g13430D
chrA05	GazeA2	UTR	8182457	8182567	4.9262	-	.	Parent=BnaA05g13430D
chrA05	GazeA2	CDS	8182423	8182456	27.8223	-	0	Parent=BnaA05g13430D
chrA05	GazeA2	CDS	8182097	8182236	33.7106	-	1	Parent=BnaA05g13430D
chrA05	GazeA2	CDS	8181832	8181957	27.4138	-	0	Parent=BnaA05g13430D
chrA05	GazeA2	CDS	8181605	8181745	31.1463	-	0	Parent=BnaA05g13430D
chrA05	GazeA2	UTR	8181309	8181604	5.3293	-	.	Parent=BnaA05g13430D
chrA05	GazeA2	mRNA	9210370	9212035	144.147	+	.	ID=BnaA05g14740D;Name=BnaA05g14740D
chrA05	GazeA2	CDS	9210370	9210393	19.0129	+	0	Parent=BnaA05g14740D
chrA05	GazeA2	CDS	9210740	9210922	13.1074	+	0	Parent=BnaA05g14740D
chrA05	GazeA2	CDS	9211013	9211076	10.9482	+	0	Parent=BnaA05g14740D
chrA05	GazeA2	CDS	9211161	9211300	13.2067	+	1	Parent=BnaA05g14740D
chrA05	GazeA2	CDS	9211385	9211631	10.5347	+	0	Parent=BnaA05g14740D
chrA05	GazeA2	CDS	9211842	9212035	22.5565	+	1	Parent=BnaA05g14740D
chrA05	GazeA2	mRNA	9219100	9220617	144.655	+	.	ID=BnaA05g14750D;Name=BnaA05g14750D
chrA05	GazeA2	CDS	9219100	9219315	22.815	+	0	Parent=BnaA05g14750D
chrA05	GazeA2	CDS	9219409	9219475	10.9429	+	0	Parent=BnaA05g14750D
chrA05	GazeA2	CDS	9219551	9219690	13.926	+	1	Parent=BnaA05g14750D
chrA05	GazeA2	CDS	9219773	9220029	9.5499	+	0	Parent=BnaA05g14750D
chrA05	GazeA2	CDS	9220230	9220290	9.7043	+	2	Parent=BnaA05g14750D
chrA05	GazeA2	CDS	9220363	9220617	22.8191	+	0	Parent=BnaA05g14750D
chrA05	GazeA2	mRNA	9236508	9239034	194.476	+	.	ID=BnaA05g14770D;Name=BnaA05g14770D
chrA05	GazeA2	CDS	9236508	9236579	22.4869	+	0	Parent=BnaA05g14770D
chrA05	GazeA2	CDS	9236801	9237142	26.1293	+	0	Parent=BnaA05g14770D
chrA05	GazeA2	CDS	9237238	9237301	13.0685	+	0	Parent=BnaA05g14770D
chrA05	GazeA2	CDS	9237376	9237515	13.0727	+	1	Parent=BnaA05g14770D
chrA05	GazeA2	CDS	9237596	9237907	14.9089	+	0	Parent=BnaA05g14770D
chrA05	GazeA2	CDS	9237984	9238282	16.8324	+	0	Parent=BnaA05g14770D
chrA05	GazeA2	CDS	9238866	9239034	22.3029	+	2	Parent=BnaA05g14770D
chrA05	GazeA2	mRNA	10360161	10361557	231.023	+	.	ID=BnaA05g15820D;Name=BnaA05g15820D
chrA05	GazeA2	UTR	10361408	10361557	3.8129	+	.	Parent=BnaA05g15820D
chrA05	GazeA2	CDS	10361361	10361407	27.5705	+	1	Parent=BnaA05g15820D
chrA05	GazeA2	CDS	10361217	10361276	23.0973	+	1	Parent=BnaA05g15820D
chrA05	GazeA2	CDS	10361058	10361124	16.9056	+	0	Parent=BnaA05g15820D
chrA05	GazeA2	CDS	10360723	10360950	22.944	+	0	Parent=BnaA05g15820D
chrA05	GazeA2	CDS	10360615	10360642	17.1	+	2	Parent=BnaA05g15820D
chrA05	GazeA2	CDS	10360323	10360420	26.6	+	0	Parent=BnaA05g15820D
chrA05	GazeA2	UTR	10360161	10360322	2.1084	+	.	Parent=BnaA05g15820D
chrA05	GazeA2	mRNA	12415950	12416642	105.546	+	.	ID=BnaA05g17550D;Name=BnaA05g17550D
chrA05	GazeA2	UTR	12416484	12416642	0.9586	+	.	Parent=BnaA05g17550D
chrA05	GazeA2	CDS	12416346	12416483	23.6925	+	0	Parent=BnaA05g17550D
chrA05	GazeA2	CDS	12416153	12416257	22.8811	+	0	Parent=BnaA05g17550D
chrA05	GazeA2	CDS	12415950	12416042	18.05	+	0	Parent=BnaA05g17550D
chrA05	GazeA2	mRNA	12433526	12433914	12.1671	+	.	ID=BnaA05g17560D;Name=BnaA05g17560D
chrA05	GazeA2	CDS	12433804	12433914	0.6445	+	0	Parent=BnaA05g17560D
chrA05	GazeA2	CDS	12433526	12433696	0.544	+	0	Parent=BnaA05g17560D
chrA05	GazeA2	mRNA	13996946	13999042	297.819	-	.	ID=BnaA05g18620D;Name=BnaA05g18620D
chrA05	GazeA2	UTR	13996946	13997136	4.3084	-	.	Parent=BnaA05g18620D
chrA05	GazeA2	CDS	13997137	13997232	30.6526	-	0	Parent=BnaA05g18620D
chrA05	GazeA2	CDS	13997313	13997401	28.6342	-	1	Parent=BnaA05g18620D
chrA05	GazeA2	CDS	13997943	13998006	21.528	-	0	Parent=BnaA05g18620D
chrA05	GazeA2	CDS	13998041	13998060	-1	-	1	Parent=BnaA05g18620D
chrA05	GazeA2	CDS	13998244	13998350	10.8328	-	2	Parent=BnaA05g18620D
chrA05	GazeA2	CDS	13998432	13998535	42.5002	-	0	Parent=BnaA05g18620D
chrA05	GazeA2	CDS	13998642	13998752	20.4704	-	0	Parent=BnaA05g18620D
chrA05	GazeA2	CDS	13998998	13999042	15.4034	-	0	Parent=BnaA05g18620D
chrA05	GazeA2	mRNA	14423186	14424803	220.785	+	.	ID=BnaA05g19090D;Name=BnaA05g19090D
chrA05	GazeA2	UTR	14424628	14424803	3.8217	+	.	Parent=BnaA05g19090D
chrA05	GazeA2	CDS	14424581	14424627	27.7011	+	1	Parent=BnaA05g19090D
chrA05	GazeA2	CDS	14424414	14424476	11	+	1	Parent=BnaA05g19090D
chrA05	GazeA2	CDS	14424274	14424337	17.1	+	0	Parent=BnaA05g19090D
chrA05	GazeA2	CDS	14423908	14424135	22.2984	+	0	Parent=BnaA05g19090D
chrA05	GazeA2	CDS	14423799	14423826	17.1	+	2	Parent=BnaA05g19090D
chrA05	GazeA2	CDS	14423357	14423475	29.1	+	0	Parent=BnaA05g19090D
chrA05	GazeA2	UTR	14423186	14423356	1.8466	+	.	Parent=BnaA05g19090D
chrA05	GazeA2	mRNA	18172654	18175463	213.078	-	.	ID=BnaA05g24190D;Name=BnaA05g24190D
chrA05	GazeA2	UTR	18175397	18175463	1.0876	-	.	Parent=BnaA05g24190D
chrA05	GazeA2	CDS	18175337	18175396	25.9346	-	0	Parent=BnaA05g24190D
chrA05	GazeA2	CDS	18174639	18174767	17.0411	-	0	Parent=BnaA05g24190D
chrA05	GazeA2	CDS	18173866	18174561	32.7083	-	0	Parent=BnaA05g24190D
chrA05	GazeA2	CDS	18173708	18173771	11.0536	-	0	Parent=BnaA05g24190D
chrA05	GazeA2	CDS	18173163	18173617	16.598	-	1	Parent=BnaA05g24190D
chrA05	GazeA2	CDS	18172814	18173068	26.5425	-	0	Parent=BnaA05g24190D
chrA05	GazeA2	UTR	18172654	18172813	0.377	-	.	Parent=BnaA05g24190D
chrA05	GazeA2	mRNA	20586106	20587411	229.903	-	.	ID=BnaA05g29530D;Name=BnaA05g29530D
chrA05	GazeA2	UTR	20587344	20587411	5.907	-	.	Parent=BnaA05g29530D
chrA05	GazeA2	UTR	20587229	20587248	3.3702	-	.	Parent=BnaA05g29530D
chrA05	GazeA2	CDS	20587159	20587228	36.5167	-	0	Parent=BnaA05g29530D
chrA05	GazeA2	CDS	20586675	20586802	30.3267	-	1	Parent=BnaA05g29530D
chrA05	GazeA2	CDS	20586480	20586584	27.5495	-	0	Parent=BnaA05g29530D
chrA05	GazeA2	CDS	20586252	20586395	31.3465	-	0	Parent=BnaA05g29530D
chrA05	GazeA2	UTR	20586106	20586251	3.9517	-	.	Parent=BnaA05g29530D
chrA05_random	GazeA2	mRNA	2839024	2840498	197.644	+	.	ID=BnaA05g37000D;Name=BnaA05g37000D
chrA05_random	GazeA2	UTR	2839024	2839098	1.3007	+	.	Parent=BnaA05g37000D
chrA05_random	GazeA2	CDS	2839099	2839330	29.7769	+	0	Parent=BnaA05g37000D
chrA05_random	GazeA2	CDS	2839411	2839484	21.6	+	1	Parent=BnaA05g37000D
chrA05_random	GazeA2	CDS	2839950	2840097	27.6	+	0	Parent=BnaA05g37000D
chrA05_random	GazeA2	CDS	2840215	2840312	32.1839	+	1	Parent=BnaA05g37000D
chrA05_random	GazeA2	UTR	2840313	2840498	4.3848	+	.	Parent=BnaA05g37000D
chrA06	GazeA2	mRNA	781764	783939	171.211	+	.	ID=BnaA06g01230D;Name=BnaA06g01230D
chrA06	GazeA2	CDS	781764	781835	22.9418	+	0	Parent=BnaA06g01230D
chrA06	GazeA2	CDS	782040	782633	21.9167	+	0	Parent=BnaA06g01230D
chrA06	GazeA2	CDS	782850	782913	10.9444	+	0	Parent=BnaA06g01230D
chrA06	GazeA2	CDS	782993	783132	10.9343	+	1	Parent=BnaA06g01230D
chrA06	GazeA2	CDS	783206	783517	14.9089	+	0	Parent=BnaA06g01230D
chrA06	GazeA2	CDS	783594	783806	17.8194	+	0	Parent=BnaA06g01230D
chrA06	GazeA2	CDS	783874	783939	5.9033	+	0	Parent=BnaA06g01230D
chrA06	GazeA2	mRNA	1652888	1654307	235.632	+	.	ID=BnaA06g02780D;Name=BnaA06g02780D
chrA06	GazeA2	UTR	1654138	1654307	4.2863	+	.	Parent=BnaA06g02780D
chrA06	GazeA2	CDS	1654091	1654137	28.968	+	1	Parent=BnaA06g02780D
chrA06	GazeA2	CDS	1653943	1654002	22.794	+	1	Parent=BnaA06g02780D
chrA06	GazeA2	CDS	1653779	1653842	17.1	+	0	Parent=BnaA06g02780D
chrA06	GazeA2	CDS	1653471	1653698	17.1	+	0	Parent=BnaA06g02780D
chrA06	GazeA2	CDS	1653347	1653374	17.0861	+	2	Parent=BnaA06g02780D
chrA06	GazeA2	CDS	1652968	1653086	27.7071	+	0	Parent=BnaA06g02780D
chrA06	GazeA2	UTR	1652888	1652967	0.7337	+	.	Parent=BnaA06g02780D
chrA06	GazeA2	mRNA	5473009	5474776	224.442	-	.	ID=BnaA06g10330D;Name=BnaA06g10330D
chrA06	GazeA2	UTR	5473009	5473217	3.8008	-	.	Parent=BnaA06g10330D
chrA06	GazeA2	CDS	5473218	5473361	30.9968	-	0	Parent=BnaA06g10330D
chrA06	GazeA2	CDS	5473462	5473566	33.4128	-	0	Parent=BnaA06g10330D
chrA06	GazeA2	CDS	5473671	5473798	27.4061	-	1	Parent=BnaA06g10330D
chrA06	GazeA2	CDS	5474405	5474474	32.4038	-	0	Parent=BnaA06g10330D
chrA06	GazeA2	UTR	5474475	5474483	-0.2025	-	.	Parent=BnaA06g10330D
chrA06	GazeA2	UTR	5474579	5474776	5.8027	-	.	Parent=BnaA06g10330D
chrA06	GazeA2	mRNA	5918330	5920273	415.361	-	.	ID=BnaA06g11360D;Name=BnaA06g11360D
chrA06	GazeA2	UTR	5918330	5918537	8.1785	-	.	Parent=BnaA06g11360D
chrA06	GazeA2	CDS	5918538	5918575	26.3901	-	1	Parent=BnaA06g11360D
chrA06	GazeA2	CDS	5918677	5918774	27.3151	-	2	Parent=BnaA06g11360D
chrA06	GazeA2	CDS	5918899	5918972	21.4881	-	0	Parent=BnaA06g11360D
chrA06	GazeA2	CDS	5919066	5919107	27.6	-	0	Parent=BnaA06g11360D
chrA06	GazeA2	CDS	5919417	5919475	21.6	-	1	Parent=BnaA06g11360D
chrA06	GazeA2	CDS	5919716	5919802	33.48	-	1	Parent=BnaA06g11360D
chrA06	GazeA2	CDS	5919899	5919926	27.6	-	0	Parent=BnaA06g11360D
chrA06	GazeA2	CDS	5920111	5920146	27.0873	-	0	Parent=BnaA06g11360D
chrA06	GazeA2	UTR	5920147	5920273	5.9329	-	.	Parent=BnaA06g11360D
chrA06	GazeA2	mRNA	6022702	6025309	375.058	-	.	ID=BnaA06g11590D;Name=BnaA06g11590D
chrA06	GazeA2	UTR	6025264	6025309	3	-	.	Parent=BnaA06g11590D
chrA06	GazeA2	UTR	6024714	6024749	2.0803	-	.	Parent=BnaA06g11590D
chrA06	GazeA2	CDS	6024657	6024713	31.7529	-	0	Parent=BnaA06g11590D
chrA06	GazeA2	CDS	6024511	6024565	16.0754	-	0	Parent=BnaA06g11590D
chrA06	GazeA2	CDS	6024235	6024273	23.0856	-	1	Parent=BnaA06g11590D
chrA06	GazeA2	CDS	6024080	6024143	17.0764	-	1	Parent=BnaA06g11590D
chrA06	GazeA2	CDS	6023927	6023988	22.9092	-	2	Parent=BnaA06g11590D
chrA06	GazeA2	CDS	6023802	6023841	17.1	-	1	Parent=BnaA06g11590D
chrA06	GazeA2	CDS	6023700	6023727	17.1	-	2	Parent=BnaA06g11590D
chrA06	GazeA2	CDS	6023447	6023538	29.1	-	0	Parent=BnaA06g11590D
chrA06	GazeA2	CDS	6022983	6023253	29.1	-	2	Parent=BnaA06g11590D
chrA06	GazeA2	UTR	6022702	6022982	3.0026	-	.	Parent=BnaA06g11590D
chrA06	GazeA2	mRNA	19166223	19167584	186.762	+	.	ID=BnaA06g27860D;Name=BnaA06g27860D
chrA06	GazeA2	UTR	19166223	19166306	2.9547	+	.	Parent=BnaA06g27860D
chrA06	GazeA2	UTR	19166376	19166482	6.756	+	.	Parent=BnaA06g27860D
chrA06	GazeA2	UTR	19166557	19166609	5.7385	+	.	Parent=BnaA06g27860D
chrA06	GazeA2	CDS	19166610	19166615	-0.1997	+	0	Parent=BnaA06g27860D
chrA06	GazeA2	CDS	19166706	19166825	17	+	0	Parent=BnaA06g27860D
chrA06	GazeA2	CDS	19166912	19167040	22.878	+	0	Parent=BnaA06g27860D
chrA06	GazeA2	CDS	19167113	19167242	23.1	+	0	Parent=BnaA06g27860D
chrA06	GazeA2	CDS	19167342	19167430	29.1	+	1	Parent=BnaA06g27860D
chrA06	GazeA2	UTR	19167431	19167584	6.302	+	.	Parent=BnaA06g27860D
chrA06	GazeA2	mRNA	22531509	22533023	259.449	-	.	ID=BnaA06g34030D;Name=BnaA06g34030D
chrA06	GazeA2	UTR	22531509	22531694	3.6449	-	.	Parent=BnaA06g34030D
chrA06	GazeA2	CDS	22531695	22531823	29.6073	-	0	Parent=BnaA06g34030D
chrA06	GazeA2	CDS	22531992	22532080	21.4126	-	1	Parent=BnaA06g34030D
chrA06	GazeA2	CDS	22532151	22532240	21.4312	-	1	Parent=BnaA06g34030D
chrA06	GazeA2	CDS	22532341	22532366	21.6	-	2	Parent=BnaA06g34030D
chrA06	GazeA2	CDS	22532470	22532594	38.6534	-	0	Parent=BnaA06g34030D
chrA06	GazeA2	UTR	22532595	22532600	-0.6824	-	.	Parent=BnaA06g34030D
chrA06	GazeA2	UTR	22532868	22533023	5.8587	-	.	Parent=BnaA06g34030D
chrA07	GazeA2	mRNA	2973308	2985859	1031.3	+	.	ID=BnaA07g03330D;Name=BnaA07g03330D
chrA07	GazeA2	UTR	2973308	2973488	5.8253	+	.	Parent=BnaA07g03330D
chrA07	GazeA2	UTR	2973664	2973687	-0.3169	+	.	Parent=BnaA07g03330D
chrA07	GazeA2	CDS	2973688	2974181	32.9155	+	0	Parent=BnaA07g03330D
chrA07	GazeA2	CDS	2974321	2974357	8.4171	+	2	Parent=BnaA07g03330D
chrA07	GazeA2	CDS	2974532	2974641	8.4171	+	0	Parent=BnaA07g03330D
chrA07	GazeA2	CDS	2974948	2975029	29.4627	+	2	Parent=BnaA07g03330D
chrA07	GazeA2	CDS	2975116	2975172	21.6	+	0	Parent=BnaA07g03330D
chrA07	GazeA2	CDS	2975281	2975336	28.5631	+	0	Parent=BnaA07g03330D
chrA07	GazeA2	CDS	2975517	2975748	31.6	+	2	Parent=BnaA07g03330D
chrA07	GazeA2	CDS	2975995	2976078	27.6	+	0	Parent=BnaA07g03330D
chrA07	GazeA2	CDS	2976163	2976237	21.6	+	0	Parent=BnaA07g03330D
chrA07	GazeA2	CDS	2976546	2976635	21.6	+	0	Parent=BnaA07g03330D
chrA07	GazeA2	CDS	2976991	2977055	27.6	+	0	Parent=BnaA07g03330D
chrA07	GazeA2	CDS	2977143	2977341	31.5	+	2	Parent=BnaA07g03330D
chrA07	GazeA2	CDS	2977427	2977515	27.6	+	0	Parent=BnaA07g03330D
chrA07	GazeA2	CDS	2977601	2977715	35.4627	+	2	Parent=BnaA07g03330D
chrA07	GazeA2	CDS	2977798	2977831	11.081	+	0	Parent=BnaA07g03330D
chrA07	GazeA2	CDS	2977914	2977927	10	+	1	Parent=BnaA07g03330D
chrA07	GazeA2	CDS	2981449	2981550	11	+	0	Parent=BnaA07g03330D
chrA07	GazeA2	CDS	2981605	2981773	10.8549	+	0	Parent=BnaA07g03330D
chrA07	GazeA2	CDS	2981804	2983398	10.9547	+	1	Parent=BnaA07g03330D
chrA07	GazeA2	CDS	2983732	2983869	11.1	+	0	Parent=BnaA07g03330D
chrA07	GazeA2	CDS	2984007	2984190	11	+	0	Parent=BnaA07g03330D
chrA07	GazeA2	CDS	2984293	2984444	11	+	1	Parent=BnaA07g03330D
chrA07	GazeA2	CDS	2984529	2984598	23.0383	+	0	Parent=BnaA07g03330D
chrA07	GazeA2	CDS	2984692	2984831	16.9158	+	1	Parent=BnaA07g03330D
chrA07	GazeA2	CDS	2984920	2985231	21.1	+	0	Parent=BnaA07g03330D
chrA07	GazeA2	CDS	2985308	2985562	29.1	+	0	Parent=BnaA07g03330D
chrA07	GazeA2	UTR	2985563	2985859	1.294	+	.	Parent=BnaA07g03330D
chrA07	GazeA2	mRNA	3082376	3083741	157.78	-	.	ID=BnaA07g03430D;Name=BnaA07g03430D
chrA07	GazeA2	UTR	3082376	3082603	-1.1039	-	.	Parent=BnaA07g03430D
chrA07	GazeA2	CDS	3082604	3082747	27.5491	-	0	Parent=BnaA07g03430D
chrA07	GazeA2	CDS	3082855	3082959	16.9091	-	0	Parent=BnaA07g03430D
chrA07	GazeA2	CDS	3083046	3083173	25.5713	-	1	Parent=BnaA07g03430D
chrA07	GazeA2	CDS	3083634	3083703	28.4846	-	0	Parent=BnaA07g03430D
chrA07	GazeA2	UTR	3083704	3083741	0.5683	-	.	Parent=BnaA07g03430D
chrA07	GazeA2	mRNA	9593388	9594882	190.221	+	.	ID=BnaA07g10040D;Name=BnaA07g10040D
chrA07	GazeA2	UTR	9594708	9594882	1.879	+	.	Parent=BnaA07g10040D
chrA07	GazeA2	CDS	9594652	9594707	21.3127	+	1	Parent=BnaA07g10040D
chrA07	GazeA2	CDS	9594440	9594566	22.956	+	0	Parent=BnaA07g10040D
chrA07	GazeA2	CDS	9594245	9594370	16.9948	+	0	Parent=BnaA07g10040D
chrA07	GazeA2	CDS	9593770	9593909	21.3225	+	1	Parent=BnaA07g10040D
chrA07	GazeA2	CDS	9593537	9593564	22.7245	+	0	Parent=BnaA07g10040D
chrA07	GazeA2	UTR	9593388	9593536	3.2242	+	.	Parent=BnaA07g10040D
chrA07	GazeA2	mRNA	13279544	13281083	224.112	-	.	ID=BnaA07g15340D;Name=BnaA07g15340D
chrA07	GazeA2	CDS	13279544	13279677	25.8509	-	1	Parent=BnaA07g15340D
chrA07	GazeA2	CDS	13280139	13280267	17.2657	-	1	Parent=BnaA07g15340D
chrA07	GazeA2	CDS	13280368	13280420	16.3877	-	2	Parent=BnaA07g15340D
chrA07	GazeA2	CDS	13280516	13280630	22.1909	-	1	Parent=BnaA07g15340D
chrA07	GazeA2	CDS	13280767	13280846	16.1994	-	2	Parent=BnaA07g15340D
chrA07	GazeA2	CDS	13280931	13280974	24.3578	-	0	Parent=BnaA07g15340D
chrA07	GazeA2	UTR	13280975	13281083	2.1046	-	.	Parent=BnaA07g15340D
chrA07	GazeA2	mRNA	14641025	14642901	278.742	-	.	ID=BnaA07g17510D;Name=BnaA07g17510D
chrA07	GazeA2	UTR	14641025	14641275	7.0613	-	.	Parent=BnaA07g17510D
chrA07	GazeA2	CDS	14641276	14641338	29.9857	-	0	Parent=BnaA07g17510D
chrA07	GazeA2	CDS	14641422	14641535	32.996	-	0	Parent=BnaA07g17510D
chrA07	GazeA2	CDS	14641624	14641776	33.1176	-	0	Parent=BnaA07g17510D
chrA07	GazeA2	CDS	14642590	14642673	33.492	-	0	Parent=BnaA07g17510D
chrA07	GazeA2	CDS	14642763	14642831	31.5058	-	0	Parent=BnaA07g17510D
chrA07	GazeA2	UTR	14642832	14642901	2.93	-	.	Parent=BnaA07g17510D
chrA07	GazeA2	mRNA	23414667	23416651	337.279	+	.	ID=BnaA07g34450D;Name=BnaA07g34450D
chrA07	GazeA2	UTR	23416378	23416651	5.5212	+	.	Parent=BnaA07g34450D
chrA07	GazeA2	CDS	23416340	23416377	29.1	+	1	Parent=BnaA07g34450D
chrA07	GazeA2	CDS	23416156	23416253	23.1875	+	2	Parent=BnaA07g34450D
chrA07	GazeA2	CDS	23415978	23416051	23.1	+	0	Parent=BnaA07g34450D
chrA07	GazeA2	CDS	23415852	23415893	17	+	0	Parent=BnaA07g34450D
chrA07	GazeA2	CDS	23415577	23415635	28.962	+	1	Parent=BnaA07g34450D
chrA07	GazeA2	CDS	23415092	23415178	25.4605	+	1	Parent=BnaA07g34450D
chrA07	GazeA2	CDS	23414917	23414944	17.1	+	0	Parent=BnaA07g34450D
chrA07	GazeA2	CDS	23414795	23414830	25.0636	+	0	Parent=BnaA07g34450D
chrA07	GazeA2	UTR	23414667	23414794	3.0846	+	.	Parent=BnaA07g34450D
chrA07_random	GazeA2	mRNA	1347529	1348394	144.868	-	.	ID=BnaA07g37890D;Name=BnaA07g37890D
chrA07_random	GazeA2	CDS	1347529	1347684	23.1	-	0	Parent=BnaA07g37890D
chrA07_random	GazeA2	CDS	1347779	1347879	11.1	-	1	Parent=BnaA07g37890D
chrA07_random	GazeA2	CDS	1347973	1348070	16.8115	-	2	Parent=BnaA07g37890D
chrA07_random	GazeA2	CDS	1348170	1348272	17.816	-	1	Parent=BnaA07g37890D
chrA07_random	GazeA2	CDS	1348349	1348394	23.1	-	0	Parent=BnaA07g37890D
chrA07_random	GazeA2	mRNA	1616339	1618119	193.422	+	.	ID=BnaA07g38410D;Name=BnaA07g38410D
chrA07_random	GazeA2	CDS	1616339	1616374	23.1	+	0	Parent=BnaA07g38410D
chrA07_random	GazeA2	CDS	1616444	1616471	11.1	+	0	Parent=BnaA07g38410D
chrA07_random	GazeA2	CDS	1616550	1616636	13.3566	+	1	Parent=BnaA07g38410D
chrA07_random	GazeA2	CDS	1617043	1617112	11.0909	+	1	Parent=BnaA07g38410D
chrA07_random	GazeA2	CDS	1617396	1617432	11	+	2	Parent=BnaA07g38410D
chrA07_random	GazeA2	CDS	1617525	1617598	10.9	+	0	Parent=BnaA07g38410D
chrA07_random	GazeA2	CDS	1617686	1617783	10.9151	+	2	Parent=BnaA07g38410D
chrA07_random	GazeA2	CDS	1617885	1617922	23.1	+	1	Parent=BnaA07g38410D
chrA07_random	GazeA2	UTR	1617923	1618119	2.1572	+	.	Parent=BnaA07g38410D
chrA08	GazeA2	mRNA	1057420	1060065	286.471	+	.	ID=BnaA08g01350D;Name=BnaA08g01350D
chrA08	GazeA2	UTR	1057420	1057459	0.4286	+	.	Parent=BnaA08g01350D
chrA08	GazeA2	CDS	1057460	1057531	26.8536	+	0	Parent=BnaA08g01350D
chrA08	GazeA2	CDS	1058017	1058520	38.8965	+	0	Parent=BnaA08g01350D
chrA08	GazeA2	CDS	1058609	1058672	16.9444	+	0	Parent=BnaA08g01350D
chrA08	GazeA2	CDS	1058752	1058891	22.7778	+	1	Parent=BnaA08g01350D
chrA08	GazeA2	CDS	1058964	1059275	26.9089	+	0	Parent=BnaA08g01350D
chrA08	GazeA2	CDS	1059477	1059781	32.4049	+	0	Parent=BnaA08g01350D
chrA08	GazeA2	CDS	1060020	1060065	10.5949	+	2	Parent=BnaA08g01350D
chrA08	GazeA2	mRNA	1624194	1624852	75.8634	+	.	ID=BnaA08g02120D;Name=BnaA08g02120D
chrA08	GazeA2	CDS	1624821	1624852	16.1078	+	1	Parent=BnaA08g02120D
chrA08	GazeA2	CDS	1624661	1624720	11.2131	+	1	Parent=BnaA08g02120D
chrA08	GazeA2	CDS	1624513	1624576	7.8041	+	0	Parent=BnaA08g02120D
chrA08	GazeA2	CDS	1624194	1624424	7.7828	+	0	Parent=BnaA08g02120D
chrA08	GazeA2	mRNA	7415595	7416602	87.3754	-	.	ID=BnaA08g07400D;Name=BnaA08g07400D
chrA08	GazeA2	UTR	7416578	7416602	-0.277	-	.	Parent=BnaA08g07400D
chrA08	GazeA2	CDS	7416467	7416577	22.6585	-	0	Parent=BnaA08g07400D
chrA08	GazeA2	CDS	7416053	7416184	11.6475	-	0	Parent=BnaA08g07400D
chrA08	GazeA2	CDS	7415878	7415962	5.7471	-	0	Parent=BnaA08g07400D
chrA08	GazeA2	CDS	7415595	7415767	5.7285	-	1	Parent=BnaA08g07400D
chrA08	GazeA2	mRNA	8822241	8823784	35.2058	+	.	ID=BnaA08g09170D;Name=BnaA08g09170D
chrA08	GazeA2	CDS	8823665	8823784	12.3758	+	0	Parent=BnaA08g09170D
chrA08	GazeA2	CDS	8822241	8822288	12.3641	+	0	Parent=BnaA08g09170D
chrA08	GazeA2	mRNA	11920352	11924814	363.399	+	.	ID=BnaA08g13930D;Name=BnaA08g13930D
chrA08	GazeA2	CDS	11920352	11920684	23.1	+	0	Parent=BnaA08g13930D
chrA08	GazeA2	CDS	11920836	11921606	16.8008	+	0	Parent=BnaA08g13930D
chrA08	GazeA2	CDS	11921688	11921719	17.1642	+	0	Parent=BnaA08g13930D
chrA08	GazeA2	CDS	11922055	11922409	23.0952	+	2	Parent=BnaA08g13930D
chrA08	GazeA2	CDS	11923652	11923730	45.6	+	0	Parent=BnaA08g13930D
chrA08	GazeA2	CDS	11924091	11924218	34.5532	+	1	Parent=BnaA08g13930D
chrA08	GazeA2	CDS	11924310	11924414	25.8675	+	0	Parent=BnaA08g13930D
chrA08	GazeA2	CDS	11924516	11924659	29.1085	+	0	Parent=BnaA08g13930D
chrA08	GazeA2	UTR	11924660	11924814	5.9104	+	.	Parent=BnaA08g13930D
chrA08	GazeA2	mRNA	15479048	15480780	252.245	+	.	ID=BnaA08g20580D;Name=BnaA08g20580D
chrA08	GazeA2	UTR	15479048	15479201	6.9183	+	.	Parent=BnaA08g20580D
chrA08	GazeA2	CDS	15479202	15479229	25.7022	+	0	Parent=BnaA08g20580D
chrA08	GazeA2	CDS	15479376	15479515	22.8438	+	1	Parent=BnaA08g20580D
chrA08	GazeA2	CDS	15480146	15480271	21.4091	+	0	Parent=BnaA08g20580D
chrA08	GazeA2	CDS	15480341	15480467	31.3455	+	0	Parent=BnaA08g20580D
chrA08	GazeA2	CDS	15480549	15480604	26.9721	+	1	Parent=BnaA08g20580D
chrA08	GazeA2	UTR	15480605	15480780	9.3414	+	.	Parent=BnaA08g20580D
chrA08	GazeA2	mRNA	16611559	16614728	470.112	+	.	ID=BnaA08g23200D;Name=BnaA08g23200D
chrA08	GazeA2	UTR	16611559	16611638	5.76	+	.	Parent=BnaA08g23200D
chrA08	GazeA2	UTR	16612405	16612467	2.6309	+	.	Parent=BnaA08g23200D
chrA08	GazeA2	CDS	16612468	16612524	26.7582	+	0	Parent=BnaA08g23200D
chrA08	GazeA2	CDS	16612704	16612758	33.6	+	0	Parent=BnaA08g23200D
chrA08	GazeA2	CDS	16613152	16613190	21.3705	+	1	Parent=BnaA08g23200D
chrA08	GazeA2	CDS	16613280	16613343	21.6	+	1	Parent=BnaA08g23200D
chrA08	GazeA2	CDS	16613446	16613507	27.5	+	2	Parent=BnaA08g23200D
chrA08	GazeA2	CDS	16613593	16613632	21.6	+	1	Parent=BnaA08g23200D
chrA08	GazeA2	CDS	16613746	16613773	27.5	+	2	Parent=BnaA08g23200D
chrA08	GazeA2	CDS	16613974	16614065	21.6	+	0	Parent=BnaA08g23200D
chrA08	GazeA2	CDS	16614149	16614419	32.3685	+	2	Parent=BnaA08g23200D
chrA08	GazeA2	UTR	16614420	16614728	2.3399	+	.	Parent=BnaA08g23200D
chrA08	GazeA2	mRNA	16689460	16691344	328.827	+	.	ID=BnaA08g23450D;Name=BnaA08g23450D
chrA08	GazeA2	UTR	16689460	16689608	7.7225	+	.	Parent=BnaA08g23450D
chrA08	GazeA2	CDS	16689609	16689644	27.3353	+	0	Parent=BnaA08g23450D
chrA08	GazeA2	CDS	16689747	16689774	17.1	+	0	Parent=BnaA08g23450D
chrA08	GazeA2	CDS	16689877	16689963	25.4585	+	1	Parent=BnaA08g23450D
chrA08	GazeA2	CDS	16690150	16690208	17.1	+	1	Parent=BnaA08g23450D
chrA08	GazeA2	CDS	16690538	16690579	17.1	+	0	Parent=BnaA08g23450D
chrA08	GazeA2	CDS	16690691	16690764	22.9	+	0	Parent=BnaA08g23450D
chrA08	GazeA2	CDS	16690877	16690974	16.8151	+	2	Parent=BnaA08g23450D
chrA08	GazeA2	CDS	16691073	16691110	27.85	+	1	Parent=BnaA08g23450D
chrA08	GazeA2	UTR	16691111	16691344	9.7131	+	.	Parent=BnaA08g23450D
chrA08	GazeA2	mRNA	16938315	16939721	267.996	+	.	ID=BnaA08g24010D;Name=BnaA08g24010D
chrA08	GazeA2	UTR	16938315	16938352	2.9849	+	.	Parent=BnaA08g24010D
chrA08	GazeA2	UTR	16938705	16938715	-0.6266	+	.	Parent=BnaA08g24010D
chrA08	GazeA2	CDS	16938716	16938840	38.7658	+	0	Parent=BnaA08g24010D
chrA08	GazeA2	CDS	16938930	16938955	21.6	+	2	Parent=BnaA08g24010D
chrA08	GazeA2	CDS	16939049	16939138	27.4295	+	1	Parent=BnaA08g24010D
chrA08	GazeA2	CDS	16939221	16939309	27.3126	+	1	Parent=BnaA08g24010D
chrA08	GazeA2	CDS	16939398	16939526	30.8164	+	0	Parent=BnaA08g24010D
chrA08	GazeA2	UTR	16939527	16939721	7.792	+	.	Parent=BnaA08g24010D
chrA09	GazeA2	mRNA	2209624	2210956	163.31	-	.	ID=BnaA09g04490D;Name=BnaA09g04490D
chrA09	GazeA2	CDS	2209624	2209712	25.0974	-	1	Parent=BnaA09g04490D
chrA09	GazeA2	CDS	2209954	2210083	17.1	-	0	Parent=BnaA09g04490D
chrA09	GazeA2	CDS	2210162	2210290	17.1	-	0	Parent=BnaA09g04490D
chrA09	GazeA2	CDS	2210373	2210492	17.1	-	0	Parent=BnaA09g04490D
chrA09	GazeA2	CDS	2210593	2210632	5.1	-	2	Parent=BnaA09g04490D
chrA09	GazeA2	CDS	2210856	2210956	4.9958	-	0	Parent=BnaA09g04490D
chrA09	GazeA2	mRNA	4865818	4867098	263.303	-	.	ID=BnaA09g09660D;Name=BnaA09g09660D
chrA09	GazeA2	CDS	4866959	4867098	3.4187	-	0	Parent=BnaA09g09660D
chrA09	GazeA2	CDS	4866707	4866822	27.3232	-	2	Parent=BnaA09g09660D
chrA09	GazeA2	CDS	4866518	4866626	27.3735	-	1	Parent=BnaA09g09660D
chrA09	GazeA2	CDS	4866367	4866445	27.429	-	2	Parent=BnaA09g09660D
chrA09	GazeA2	CDS	4866171	4866287	21.6	-	0	Parent=BnaA09g09660D
chrA09	GazeA2	CDS	4865951	4866088	31.2667	-	0	Parent=BnaA09g09660D
chrA09	GazeA2	UTR	4865818	4865950	5.9645	-	.	Parent=BnaA09g09660D
chrA09	GazeA2	mRNA	5900570	5901794	195.836	+	.	ID=BnaA09g11510D;Name=BnaA09g11510D
chrA09	GazeA2	UTR	5900570	5900651	1.9873	+	.	Parent=BnaA09g11510D
chrA09	GazeA2	CDS	5900652	5900721	32.0167	+	0	Parent=BnaA09g11510D
chrA09	GazeA2	CDS	5900984	5901111	24.1954	+	1	Parent=BnaA09g11510D
chrA09	GazeA2	CDS	5901182	5901286	21.4125	+	0	Parent=BnaA09g11510D
chrA09	GazeA2	CDS	5901366	5901509	30.4947	+	0	Parent=BnaA09g11510D
chrA09	GazeA2	UTR	5901510	5901794	4.8302	+	.	Parent=BnaA09g11510D
chrA09	GazeA2	mRNA	6314955	6316004	135.729	+	.	ID=BnaA09g12050D;Name=BnaA09g12050D
chrA09	GazeA2	CDS	6315861	6316004	29.2	+	0	Parent=BnaA09g12050D
chrA09	GazeA2	CDS	6315637	6315753	17.1	+	0	Parent=BnaA09g12050D
chrA09	GazeA2	CDS	6315440	6315567	11.1	+	1	Parent=BnaA09g12050D
chrA09	GazeA2	CDS	6315331	6315359	-1	+	2	Parent=BnaA09g12050D
chrA09	GazeA2	CDS	6315253	6315286	-1	+	1	Parent=BnaA09g12050D
chrA09	GazeA2	CDS	6314955	6315045	23	+	0	Parent=BnaA09g12050D
chrA09	GazeA2	mRNA	9649305	9650873	259.525	-	.	ID=BnaA09g16240D;Name=BnaA09g16240D
chrA09	GazeA2	UTR	9650776	9650873	2.7583	-	.	Parent=BnaA09g16240D
chrA09	GazeA2	CDS	9650746	9650775	18.1969	-	0	Parent=BnaA09g16240D
chrA09	GazeA2	CDS	9650539	9650642	32.9456	-	0	Parent=BnaA09g16240D
chrA09	GazeA2	CDS	9650304	9650445	10.8951	-	2	Parent=BnaA09g16240D
chrA09	GazeA2	CDS	9650168	9650231	13.6072	-	0	Parent=BnaA09g16240D
chrA09	GazeA2	CDS	9649755	9649843	28.579	-	1	Parent=BnaA09g16240D
chrA09	GazeA2	CDS	9649576	9649671	32.9945	-	0	Parent=BnaA09g16240D
chrA09	GazeA2	UTR	9649305	9649575	7.7118	-	.	Parent=BnaA09g16240D
chrA09	GazeA2	mRNA	12022907	12024199	209.552	+	.	ID=BnaA09g19140D;Name=BnaA09g19140D
chrA09	GazeA2	UTR	12022907	12023067	2.784	+	.	Parent=BnaA09g19140D
chrA09	GazeA2	UTR	12023166	12023177	-0.3396	+	.	Parent=BnaA09g19140D
chrA09	GazeA2	CDS	12023178	12023302	33.8175	+	0	Parent=BnaA09g19140D
chrA09	GazeA2	CDS	12023386	12023411	17.1	+	2	Parent=BnaA09g19140D
chrA09	GazeA2	CDS	12023490	12023579	22.8099	+	1	Parent=BnaA09g19140D
chrA09	GazeA2	CDS	12023667	12023755	16.9126	+	1	Parent=BnaA09g19140D
chrA09	GazeA2	CDS	12023887	12024015	28.9068	+	0	Parent=BnaA09g19140D
chrA09	GazeA2	UTR	12024016	12024199	3.5441	+	.	Parent=BnaA09g19140D
chrA09	GazeA2	mRNA	22359097	22360539	252.662	+	.	ID=BnaA09g30000D;Name=BnaA09g30000D
chrA09	GazeA2	UTR	22360357	22360539	5.4269	+	.	Parent=BnaA09g30000D
chrA09	GazeA2	CDS	22360301	22360356	26.1407	+	1	Parent=BnaA09g30000D
chrA09	GazeA2	CDS	22360033	22360159	32.6551	+	0	Parent=BnaA09g30000D
chrA09	GazeA2	CDS	22359830	22359955	27.2627	+	0	Parent=BnaA09g30000D
chrA09	GazeA2	CDS	22359363	22359502	21.5609	+	1	Parent=BnaA09g30000D
chrA09	GazeA2	CDS	22359177	22359204	27.9696	+	0	Parent=BnaA09g30000D
chrA09	GazeA2	UTR	22359097	22359176	3.8431	+	.	Parent=BnaA09g30000D
chrA09	GazeA2	mRNA	24389854	24391472	199.977	-	.	ID=BnaA09g32990D;Name=BnaA09g32990D
chrA09	GazeA2	UTR	24389854	24390129	4.7688	-	.	Parent=BnaA09g32990D
chrA09	GazeA2	CDS	24390130	24390270	30.4755	-	0	Parent=BnaA09g32990D
chrA09	GazeA2	CDS	24390353	24390478	27.4091	-	0	Parent=BnaA09g32990D
chrA09	GazeA2	CDS	24390708	24390847	29.1647	-	1	Parent=BnaA09g32990D
chrA09	GazeA2	CDS	24391308	24391341	27.8433	-	0	Parent=BnaA09g32990D
chrA09	GazeA2	UTR	24391342	24391472	6.5616	-	.	Parent=BnaA09g32990D
chrA09	GazeA2	mRNA	25545538	25547108	251.243	+	.	ID=BnaA09g34960D;Name=BnaA09g34960D
chrA09	GazeA2	UTR	25545538	25545605	1.8922	+	.	Parent=BnaA09g34960D
chrA09	GazeA2	CDS	25545606	25545651	31.2463	+	0	Parent=BnaA09g34960D
chrA09	GazeA2	CDS	25545771	25545873	31.2736	+	1	Parent=BnaA09g34960D
chrA09	GazeA2	CDS	25546089	25546186	21.4115	+	2	Parent=BnaA09g34960D
chrA09	GazeA2	CDS	25546264	25546364	21.1269	+	1	Parent=BnaA09g34960D
chrA09	GazeA2	CDS	25546619	25546774	30.4263	+	0	Parent=BnaA09g34960D
chrA09	GazeA2	UTR	25546775	25547108	6.0478	+	.	Parent=BnaA09g34960D
chrA09	GazeA2	mRNA	30884928	30887459	452.877	+	.	ID=BnaA09g45050D;Name=BnaA09g45050D
chrA09	GazeA2	UTR	30884928	30885001	2.968	+	.	Parent=BnaA09g45050D
chrA09	GazeA2	UTR	30885397	30885434	1.5716	+	.	Parent=BnaA09g45050D
chrA09	GazeA2	CDS	30885435	30885491	28.1386	+	0	Parent=BnaA09g45050D
chrA09	GazeA2	CDS	30885664	30885718	33.6	+	0	Parent=BnaA09g45050D
chrA09	GazeA2	CDS	30886038	30886076	19.9855	+	1	Parent=BnaA09g45050D
chrA09	GazeA2	CDS	30886171	30886234	21.6	+	1	Parent=BnaA09g45050D
chrA09	GazeA2	CDS	30886333	30886394	27.428	+	2	Parent=BnaA09g45050D
chrA09	GazeA2	CDS	30886481	30886520	21.4875	+	1	Parent=BnaA09g45050D
chrA09	GazeA2	CDS	30886645	30886672	21.5	+	2	Parent=BnaA09g45050D
chrA09	GazeA2	CDS	30886834	30886925	21.5505	+	0	Parent=BnaA09g45050D
chrA09	GazeA2	CDS	30887004	30887274	31.7382	+	2	Parent=BnaA09g45050D
chrA09	GazeA2	UTR	30887275	30887459	1.6296	+	.	Parent=BnaA09g45050D
chrA09_random	GazeA2	mRNA	4035452	4036922	266.807	+	.	ID=BnaA09g57120D;Name=BnaA09g57120D
chrA09_random	GazeA2	UTR	4035452	4035563	5.0414	+	.	Parent=BnaA09g57120D
chrA09_random	GazeA2	UTR	4035937	4035947	-0.5229	+	.	Parent=BnaA09g57120D
chrA09_random	GazeA2	CDS	4035948	4036072	38.376	+	0	Parent=BnaA09g57120D
chrA09_random	GazeA2	CDS	4036144	4036169	27.6	+	2	Parent=BnaA09g57120D
chrA09_random	GazeA2	CDS	4036241	4036330	21.4116	+	1	Parent=BnaA09g57120D
chrA09_random	GazeA2	CDS	4036405	4036493	21.4165	+	1	Parent=BnaA09g57120D
chrA09_random	GazeA2	CDS	4036568	4036696	30.9247	+	0	Parent=BnaA09g57120D
chrA09_random	GazeA2	UTR	4036697	4036922	7.5039	+	.	Parent=BnaA09g57120D
chrA10	GazeA2	mRNA	1601107	1603155	90.5428	+	.	ID=BnaA10g03140D;Name=BnaA10g03140D
chrA10	GazeA2	UTR	1601107	1601473	2.5773	+	.	Parent=BnaA10g03140D
chrA10	GazeA2	UTR	1601595	1601686	2.8171	+	.	Parent=BnaA10g03140D
chrA10	GazeA2	UTR	1601921	1601999	6.9408	+	.	Parent=BnaA10g03140D
chrA10	GazeA2	UTR	1602150	1602165	-0.7256	+	.	Parent=BnaA10g03140D
chrA10	GazeA2	CDS	1602166	1602300	14.4709	+	0	Parent=BnaA10g03140D
chrA10	GazeA2	CDS	1602638	1602725	2.4382	+	0	Parent=BnaA10g03140D
chrA10	GazeA2	CDS	1602831	1602919	2.5125	+	1	Parent=BnaA10g03140D
chrA10	GazeA2	CDS	1603018	1603155	14.5029	+	0	Parent=BnaA10g03140D
chrA10	GazeA2	mRNA	5152188	5153779	248.131	-	.	ID=BnaA10g06670D;Name=BnaA10g06670D
chrA10	GazeA2	UTR	5153632	5153779	5.8119	-	.	Parent=BnaA10g06670D
chrA10	GazeA2	UTR	5153522	5153542	2.3129	-	.	Parent=BnaA10g06670D
chrA10	GazeA2	CDS	5153452	5153521	37.2267	-	0	Parent=BnaA10g06670D
chrA10	GazeA2	CDS	5153094	5153221	36.2521	-	1	Parent=BnaA10g06670D
chrA10	GazeA2	CDS	5152895	5152999	33.4827	-	0	Parent=BnaA10g06670D
chrA10	GazeA2	CDS	5152448	5152591	30.8051	-	0	Parent=BnaA10g06670D
chrA10	GazeA2	UTR	5152188	5152447	11.3418	-	.	Parent=BnaA10g06670D
chrA10	GazeA2	mRNA	8797704	8799298	166.529	+	.	ID=BnaA10g10300D;Name=BnaA10g10300D
chrA10	GazeA2	UTR	8797704	8798114	8.1228	+	.	Parent=BnaA10g10300D
chrA10	GazeA2	CDS	8798115	8798184	27.7667	+	0	Parent=BnaA10g10300D
chrA10	GazeA2	CDS	8798276	8798403	22.8061	+	1	Parent=BnaA10g10300D
chrA10	GazeA2	CDS	8798505	8798609	16.9125	+	0	Parent=BnaA10g10300D
chrA10	GazeA2	CDS	8798906	8799049	28.9044	+	0	Parent=BnaA10g10300D
chrA10	GazeA2	UTR	8799050	8799298	2.1484	+	.	Parent=BnaA10g10300D
chrA10	GazeA2	mRNA	8986637	8987000	24.2789	+	.	ID=BnaA10g10530D;Name=BnaA10g10530D
chrA10	GazeA2	CDS	8986882	8987000	12.7121	+	1	Parent=BnaA10g10530D
chrA10	GazeA2	CDS	8986637	8986715	0.6121	+	0	Parent=BnaA10g10530D
chrA10	GazeA2	mRNA	10170717	10172097	219.231	-	.	ID=BnaA10g12310D;Name=BnaA10g12310D
chrA10	GazeA2	UTR	10170717	10170939	4.9707	-	.	Parent=BnaA10g12310D
chrA10	GazeA2	CDS	10170940	10171017	27.1463	-	0	Parent=BnaA10g12310D
chrA10	GazeA2	CDS	10171104	10171181	21.6	-	0	Parent=BnaA10g12310D
chrA10	GazeA2	CDS	10171263	10171363	21.51	-	1	Parent=BnaA10g12310D
chrA10	GazeA2	CDS	10171446	10171543	21.3215	-	2	Parent=BnaA10g12310D
chrA10	GazeA2	CDS	10171635	10171737	19.8761	-	1	Parent=BnaA10g12310D
chrA10	GazeA2	CDS	10172058	10172097	-1.0359	-	0	Parent=BnaA10g12310D
chrA10	GazeA2	mRNA	16289585	16291032	136.746	+	.	ID=BnaA10g25250D;Name=BnaA10g25250D
chrA10	GazeA2	UTR	16289585	16289728	2.8747	+	.	Parent=BnaA10g25250D
chrA10	GazeA2	UTR	16290181	16290263	6.7452	+	.	Parent=BnaA10g25250D
chrA10	GazeA2	CDS	16290264	16290495	24.5391	+	0	Parent=BnaA10g25250D
chrA10	GazeA2	CDS	16290569	16290646	10.8896	+	1	Parent=BnaA10g25250D
chrA10	GazeA2	CDS	16290708	16290820	16.9998	+	1	Parent=BnaA10g25250D
chrA10	GazeA2	CDS	16290925	16291032	10.7896	+	0	Parent=BnaA10g25250D
chrA10_random	GazeA2	mRNA	531490	533240	208.572	-	.	ID=BnaA10g28230D;Name=BnaA10g28230D
chrA10_random	GazeA2	UTR	531490	531627	1.7595	-	.	Parent=BnaA10g28230D
chrA10_random	GazeA2	CDS	531628	531723	27.5651	-	0	Parent=BnaA10g28230D
chrA10_random	GazeA2	CDS	531802	531890	18.1145	-	1	Parent=BnaA10g28230D
chrA10_random	GazeA2	CDS	532402	532461	11	-	1	Parent=BnaA10g28230D
chrA10_random	GazeA2	CDS	532767	532873	10.8075	-	2	Parent=BnaA10g28230D
chrA10_random	GazeA2	CDS	532942	533045	21.2619	-	0	Parent=BnaA10g28230D
chrA10_random	GazeA2	CDS	533160	533189	25.6	-	0	Parent=BnaA10g28230D
chrA10_random	GazeA2	UTR	533190	533240	1.7893	-	.	Parent=BnaA10g28230D
chrAnn_random	GazeA2	mRNA	5284726	5285418	102.483	-	.	ID=BnaAnng04570D;Name=BnaAnng04570D
chrAnn_random	GazeA2	UTR	5284726	5284884	0.4683	-	.	Parent=BnaAnng04570D
chrAnn_random	GazeA2	CDS	5284885	5285022	26.8749	-	0	Parent=BnaAnng04570D
chrAnn_random	GazeA2	CDS	5285111	5285215	17.0786	-	0	Parent=BnaAnng04570D
chrAnn_random	GazeA2	CDS	5285326	5285418	18.0978	-	0	Parent=BnaAnng04570D
chrAnn_random	GazeA2	mRNA	9698520	9700252	261.779	-	.	ID=BnaAnng09200D;Name=BnaAnng09200D
chrAnn_random	GazeA2	CDS	9698520	9698615	33.182	-	0	Parent=BnaAnng09200D
chrAnn_random	GazeA2	CDS	9698717	9698805	21.159	-	1	Parent=BnaAnng09200D
chrAnn_random	GazeA2	CDS	9699222	9699285	17	-	0	Parent=BnaAnng09200D
chrAnn_random	GazeA2	CDS	9699722	9699824	16.9038	-	2	Parent=BnaAnng09200D
chrAnn_random	GazeA2	CDS	9699913	9700016	16.711	-	0	Parent=BnaAnng09200D
chrAnn_random	GazeA2	CDS	9700125	9700154	23.8763	-	0	Parent=BnaAnng09200D
chrAnn_random	GazeA2	UTR	9700155	9700252	5.3019	-	.	Parent=BnaAnng09200D
chrAnn_random	GazeA2	mRNA	14021110	14023147	412.583	+	.	ID=BnaAnng13030D;Name=BnaAnng13030D
chrAnn_random	GazeA2	UTR	14021110	14021397	7.9974	+	.	Parent=BnaAnng13030D
chrAnn_random	GazeA2	CDS	14021398	14021433	29.7558	+	0	Parent=BnaAnng13030D
chrAnn_random	GazeA2	CDS	14021508	14021535	27.2805	+	0	Parent=BnaAnng13030D
chrAnn_random	GazeA2	CDS	14021640	14021726	23.8874	+	1	Parent=BnaAnng13030D
chrAnn_random	GazeA2	CDS	14021844	14021902	21.5235	+	1	Parent=BnaAnng13030D
chrAnn_random	GazeA2	CDS	14022218	14022259	21.6	+	0	Parent=BnaAnng13030D
chrAnn_random	GazeA2	CDS	14022350	14022423	21.2155	+	0	Parent=BnaAnng13030D
chrAnn_random	GazeA2	CDS	14022535	14022632	27.2268	+	2	Parent=BnaAnng13030D
chrAnn_random	GazeA2	CDS	14022715	14022752	29.8024	+	1	Parent=BnaAnng13030D
chrAnn_random	GazeA2	UTR	14022753	14023147	13.5016	+	.	Parent=BnaAnng13030D
chrAnn_random	GazeA2	mRNA	21646216	21647104	161.447	+	.	ID=BnaAnng19750D;Name=BnaAnng19750D
chrAnn_random	GazeA2	UTR	21646216	21646243	0.931	+	.	Parent=BnaAnng19750D
chrAnn_random	GazeA2	CDS	21646244	21646273	21.768	+	0	Parent=BnaAnng19750D
chrAnn_random	GazeA2	CDS	21646366	21646469	12.4154	+	0	Parent=BnaAnng19750D
chrAnn_random	GazeA2	CDS	21646561	21646727	12.4987	+	2	Parent=BnaAnng19750D
chrAnn_random	GazeA2	CDS	21646818	21646906	12.4912	+	1	Parent=BnaAnng19750D
chrAnn_random	GazeA2	CDS	21647009	21647104	21.4074	+	0	Parent=BnaAnng19750D
chrAnn_random	GazeA2	mRNA	24359973	24361528	218.787	+	.	ID=BnaAnng21880D;Name=BnaAnng21880D
chrAnn_random	GazeA2	UTR	24359973	24360454	7.612	+	.	Parent=BnaAnng21880D
chrAnn_random	GazeA2	CDS	24360455	24360579	34.113	+	0	Parent=BnaAnng21880D
chrAnn_random	GazeA2	CDS	24360678	24360703	17.1	+	2	Parent=BnaAnng21880D
chrAnn_random	GazeA2	CDS	24360788	24360877	22.9128	+	1	Parent=BnaAnng21880D
chrAnn_random	GazeA2	CDS	24361096	24361184	28.362	+	1	Parent=BnaAnng21880D
chrAnn_random	GazeA2	CDS	24361272	24361394	27.2226	+	0	Parent=BnaAnng21880D
chrAnn_random	GazeA2	UTR	24361395	24361528	1.574	+	.	Parent=BnaAnng21880D
chrAnn_random	GazeA2	mRNA	32769308	32770832	186.074	-	.	ID=BnaAnng28650D;Name=BnaAnng28650D
chrAnn_random	GazeA2	UTR	32769308	32769609	4.6517	-	.	Parent=BnaAnng28650D
chrAnn_random	GazeA2	CDS	32769610	32769753	30.5483	-	0	Parent=BnaAnng28650D
chrAnn_random	GazeA2	CDS	32770106	32770210	21.4125	-	0	Parent=BnaAnng28650D
chrAnn_random	GazeA2	CDS	32770291	32770418	22.9061	-	1	Parent=BnaAnng28650D
chrAnn_random	GazeA2	CDS	32770488	32770593	35	-	0	Parent=BnaAnng28650D
chrAnn_random	GazeA2	UTR	32770594	32770832	4.6924	-	.	Parent=BnaAnng28650D
chrAnn_random	GazeA2	mRNA	39013386	39015202	206.322	-	.	ID=BnaAnng34240D;Name=BnaAnng34240D
chrAnn_random	GazeA2	UTR	39013386	39013532	2.6812	-	.	Parent=BnaAnng34240D
chrAnn_random	GazeA2	CDS	39013533	39013595	29.0322	-	0	Parent=BnaAnng34240D
chrAnn_random	GazeA2	CDS	39013690	39013803	17.007	-	0	Parent=BnaAnng34240D
chrAnn_random	GazeA2	CDS	39013881	39014033	16.9193	-	0	Parent=BnaAnng34240D
chrAnn_random	GazeA2	CDS	39014794	39014877	28.884	-	0	Parent=BnaAnng34240D
chrAnn_random	GazeA2	CDS	39014968	39015036	29.1	-	0	Parent=BnaAnng34240D
chrAnn_random	GazeA2	UTR	39015037	39015202	3.0233	-	.	Parent=BnaAnng34240D
chrC01	GazeA2	mRNA	1189076	1190130	221.599	-	.	ID=BnaC01g02310D;Name=BnaC01g02310D
chrC01	GazeA2	UTR	1190076	1190130	1.5603	-	.	Parent=BnaC01g02310D
chrC01	GazeA2	CDS	1190046	1190075	24.151	-	0	Parent=BnaC01g02310D
chrC01	GazeA2	CDS	1189842	1189945	22.0853	-	0	Parent=BnaC01g02310D
chrC01	GazeA2	CDS	1189663	1189765	16.0507	-	2	Parent=BnaC01g02310D
chrC01	GazeA2	CDS	1189517	1189580	15.9507	-	0	Parent=BnaC01g02310D
chrC01	GazeA2	CDS	1189346	1189434	15.9397	-	1	Parent=BnaC01g02310D
chrC01	GazeA2	CDS	1189167	1189262	25.0309	-	0	Parent=BnaC01g02310D
chrC01	GazeA2	UTR	1189076	1189166	0.8919	-	.	Parent=BnaC01g02310D
chrC01	GazeA2	mRNA	14416767	14421396	372.326	-	.	ID=BnaC01g20530D;Name=BnaC01g20530D
chrC01	GazeA2	UTR	14421236	14421396	2.8443	-	.	Parent=BnaC01g20530D
chrC01	GazeA2	UTR	14421121	14421144	-0.3811	-	.	Parent=BnaC01g20530D
chrC01	GazeA2	CDS	14420749	14421120	29.0822	-	0	Parent=BnaC01g20530D
chrC01	GazeA2	CDS	14419676	14420446	20.1303	-	0	Parent=BnaC01g20530D
chrC01	GazeA2	CDS	14419542	14419573	11.0985	-	0	Parent=BnaC01g20530D
chrC01	GazeA2	CDS	14419184	14419466	27.0668	-	2	Parent=BnaC01g20530D
chrC01	GazeA2	CDS	14417979	14418057	39.6962	-	0	Parent=BnaC01g20530D
chrC01	GazeA2	CDS	14417510	14417637	30.2977	-	1	Parent=BnaC01g20530D
chrC01	GazeA2	CDS	14417319	14417423	33.5	-	0	Parent=BnaC01g20530D
chrC01	GazeA2	CDS	14417005	14417148	31.0996	-	0	Parent=BnaC01g20530D
chrC01	GazeA2	UTR	14416767	14417004	10.5436	-	.	Parent=BnaC01g20530D
chrC01	GazeA2	mRNA	15361419	15363371	209.358	+	.	ID=BnaC01g21910D;Name=BnaC01g21910D
chrC01	GazeA2	CDS	15362949	15363371	29.2	+	0	Parent=BnaC01g21910D
chrC01	GazeA2	CDS	15362250	15362413	23.0165	+	1	Parent=BnaC01g21910D
chrC01	GazeA2	CDS	15362061	15362145	17.0457	+	0	Parent=BnaC01g21910D
chrC01	GazeA2	CDS	15361841	15361972	28.9852	+	0	Parent=BnaC01g21910D
chrC01	GazeA2	CDS	15361514	15361624	28.8486	+	0	Parent=BnaC01g21910D
chrC01	GazeA2	UTR	15361419	15361513	2.5558	+	.	Parent=BnaC01g21910D
chrC01	GazeA2	mRNA	18582000	18582390	62.1546	+	.	ID=BnaC01g24100D;Name=BnaC01g24100D
chrC01	GazeA2	CDS	18582328	18582390	19.8542	+	0	Parent=BnaC01g24100D
chrC01	GazeA2	CDS	18582126	18582242	7.744	+	0	Parent=BnaC01g24100D
chrC01	GazeA2	CDS	18582000	18582029	12.5859	+	0	Parent=BnaC01g24100D
chrC01	GazeA2	mRNA	31483442	31483980	52.1694	+	.	ID=BnaC01g32360D;Name=BnaC01g32360D
chrC01	GazeA2	CDS	31483442	31483485	13.5996	+	0	Parent=BnaC01g32360D
chrC01	GazeA2	CDS	31483626	31483705	3.2035	+	2	Parent=BnaC01g32360D
chrC01	GazeA2	CDS	31483862	31483980	13.4422	+	1	Parent=BnaC01g32360D
chrC01	GazeA2	mRNA	32038104	32039653	237.58	+	.	ID=BnaC01g32800D;Name=BnaC01g32800D
chrC01	GazeA2	UTR	32039458	32039653	3.121	+	.	Parent=BnaC01g32800D
chrC01	GazeA2	CDS	32039411	32039457	24.574	+	1	Parent=BnaC01g32800D
chrC01	GazeA2	CDS	32039265	32039324	17.0947	+	1	Parent=BnaC01g32800D
chrC01	GazeA2	CDS	32039112	32039175	23.0943	+	0	Parent=BnaC01g32800D
chrC01	GazeA2	CDS	32038801	32039028	22.8458	+	0	Parent=BnaC01g32800D
chrC01	GazeA2	CDS	32038690	32038717	17.0975	+	2	Parent=BnaC01g32800D
chrC01	GazeA2	CDS	32038192	32038310	29.0395	+	0	Parent=BnaC01g32800D
chrC01	GazeA2	UTR	32038104	32038191	0.8949	+	.	Parent=BnaC01g32800D
chrC01	GazeA2	mRNA	35473529	35476671	239.442	-	.	ID=BnaC01g36100D;Name=BnaC01g36100D
chrC01	GazeA2	CDS	35476621	35476671	23.0819	-	0	Parent=BnaC01g36100D
chrC01	GazeA2	CDS	35476007	35476126	21.308	-	0	Parent=BnaC01g36100D
chrC01	GazeA2	CDS	35475130	35475936	22.5653	-	0	Parent=BnaC01g36100D
chrC01	GazeA2	CDS	35474924	35475067	10.9563	-	0	Parent=BnaC01g36100D
chrC01	GazeA2	CDS	35474775	35474838	13.4187	-	0	Parent=BnaC01g36100D
chrC01	GazeA2	CDS	35474544	35474683	15.7114	-	1	Parent=BnaC01g36100D
chrC01	GazeA2	CDS	35474152	35474463	21.0429	-	0	Parent=BnaC01g36100D
chrC01	GazeA2	CDS	35473752	35474063	28.9079	-	0	Parent=BnaC01g36100D
chrC01	GazeA2	UTR	35473529	35473751	2.6892	-	.	Parent=BnaC01g36100D
chrC01	GazeA2	mRNA	38053446	38061974	271.269	-	.	ID=BnaC01g39370D;Name=BnaC01g39370D
chrC01	GazeA2	CDS	38061851	38061974	21.0012	-	0	Parent=BnaC01g39370D
chrC01	GazeA2	CDS	38060440	38060473	-1	-	1	Parent=BnaC01g39370D
chrC01	GazeA2	CDS	38059758	38059798	-1	-	2	Parent=BnaC01g39370D
chrC01	GazeA2	CDS	38057453	38057868	6.084	-	1	Parent=BnaC01g39370D
chrC01	GazeA2	CDS	38056399	38057025	10.8	-	0	Parent=BnaC01g39370D
chrC01	GazeA2	CDS	38054840	38054918	31.6996	-	0	Parent=BnaC01g39370D
chrC01	GazeA2	CDS	38054107	38054234	27.5691	-	1	Parent=BnaC01g39370D
chrC01	GazeA2	CDS	38053898	38054002	33.6	-	0	Parent=BnaC01g39370D
chrC01	GazeA2	CDS	38053655	38053798	31.2039	-	0	Parent=BnaC01g39370D
chrC01	GazeA2	UTR	38053446	38053654	7.8127	-	.	Parent=BnaC01g39370D
chrC01_random	GazeA2	mRNA	3723225	3725110	259.591	+	.	ID=BnaC01g44130D;Name=BnaC01g44130D
chrC01_random	GazeA2	UTR	3723225	3723300	1.564	+	.	Parent=BnaC01g44130D
chrC01_random	GazeA2	CDS	3723301	3723411	32.1157	+	0	Parent=BnaC01g44130D
chrC01_random	GazeA2	CDS	3723694	3723825	27.256	+	0	Parent=BnaC01g44130D
chrC01_random	GazeA2	CDS	3723916	3724000	21.6	+	0	Parent=BnaC01g44130D
chrC01_random	GazeA2	CDS	3724111	3724274	37.519	+	1	Parent=BnaC01g44130D
chrC01_random	GazeA2	CDS	3724676	3725110	31.8055	+	0	Parent=BnaC01g44130D
chrC02	GazeA2	mRNA	1325325	1325877	51.9317	-	.	ID=BnaC02g02910D;Name=BnaC02g02910D
chrC02	GazeA2	CDS	1325325	1325443	13.4502	-	1	Parent=BnaC02g02910D
chrC02	GazeA2	CDS	1325608	1325687	3.0531	-	2	Parent=BnaC02g02910D
chrC02	GazeA2	CDS	1325834	1325877	13.51	-	0	Parent=BnaC02g02910D
chrC02	GazeA2	mRNA	5731145	5732661	211.358	+	.	ID=BnaC02g10070D;Name=BnaC02g10070D
chrC02	GazeA2	UTR	5732288	5732661	7.0677	+	.	Parent=BnaC02g10070D
chrC02	GazeA2	CDS	5732210	5732287	27.2729	+	0	Parent=BnaC02g10070D
chrC02	GazeA2	CDS	5732053	5732130	17.0449	+	0	Parent=BnaC02g10070D
chrC02	GazeA2	CDS	5731836	5731936	16.9953	+	1	Parent=BnaC02g10070D
chrC02	GazeA2	CDS	5731655	5731752	17.0182	+	2	Parent=BnaC02g10070D
chrC02	GazeA2	CDS	5731391	5731482	13.2636	+	0	Parent=BnaC02g10070D
chrC02	GazeA2	CDS	5731256	5731321	18.6784	+	0	Parent=BnaC02g10070D
chrC02	GazeA2	UTR	5731145	5731255	3.1179	+	.	Parent=BnaC02g10070D
chrC02	GazeA2	mRNA	7934125	7935915	165.229	-	.	ID=BnaC02g12450D;Name=BnaC02g12450D
chrC02	GazeA2	UTR	7934125	7934413	1.7715	-	.	Parent=BnaC02g12450D
chrC02	GazeA2	CDS	7934414	7934557	28.9044	-	0	Parent=BnaC02g12450D
chrC02	GazeA2	CDS	7934913	7935017	16.9125	-	0	Parent=BnaC02g12450D
chrC02	GazeA2	CDS	7935117	7935244	16.9061	-	1	Parent=BnaC02g12450D
chrC02	GazeA2	CDS	7935417	7935522	35.1	-	0	Parent=BnaC02g12450D
chrC02	GazeA2	UTR	7935523	7935915	5.8224	-	.	Parent=BnaC02g12450D
chrC02	GazeA2	mRNA	9805587	9807121	227.34	+	.	ID=BnaC02g14410D;Name=BnaC02g14410D
chrC02	GazeA2	UTR	9806790	9807121	4.8256	+	.	Parent=BnaC02g14410D
chrC02	GazeA2	CDS	9806646	9806789	30.4387	+	0	Parent=BnaC02g14410D
chrC02	GazeA2	CDS	9806218	9806322	27.4168	+	0	Parent=BnaC02g14410D
chrC02	GazeA2	CDS	9805974	9806101	36.267	+	1	Parent=BnaC02g14410D
chrC02	GazeA2	CDS	9805767	9805836	37.4655	+	0	Parent=BnaC02g14410D
chrC02	GazeA2	UTR	9805587	9805766	10.0942	+	.	Parent=BnaC02g14410D
chrC02	GazeA2	mRNA	22610710	22612361	390.297	+	.	ID=BnaC02g25260D;Name=BnaC02g25260D
chrC02	GazeA2	UTR	22612179	22612361	6.9515	+	.	Parent=BnaC02g25260D
chrC02	GazeA2	CDS	22612141	22612178	26.6418	+	1	Parent=BnaC02g25260D
chrC02	GazeA2	CDS	22611944	22612041	33.6621	+	2	Parent=BnaC02g25260D
chrC02	GazeA2	CDS	22611777	22611850	27.5778	+	0	Parent=BnaC02g25260D
chrC02	GazeA2	CDS	22611651	22611692	21.5874	+	0	Parent=BnaC02g25260D
chrC02	GazeA2	CDS	22611298	22611356	21.5949	+	1	Parent=BnaC02g25260D
chrC02	GazeA2	CDS	22611086	22611175	13.4288	+	1	Parent=BnaC02g25260D
chrC02	GazeA2	CDS	22610961	22610988	27.6	+	0	Parent=BnaC02g25260D
chrC02	GazeA2	CDS	22610849	22610884	32.1056	+	0	Parent=BnaC02g25260D
chrC02	GazeA2	UTR	22610710	22610848	6.3442	+	.	Parent=BnaC02g25260D
chrC02	GazeA2	mRNA	37394724	37396315	267.126	+	.	ID=BnaC02g34760D;Name=BnaC02g34760D
chrC02	GazeA2	UTR	37396057	37396315	4.3911	+	.	Parent=BnaC02g34760D
chrC02	GazeA2	CDS	37395928	37396056	30.7409	+	0	Parent=BnaC02g34760D
chrC02	GazeA2	CDS	37395716	37395804	27.3159	+	1	Parent=BnaC02g34760D
chrC02	GazeA2	CDS	37395535	37395624	21.519	+	1	Parent=BnaC02g34760D
chrC02	GazeA2	CDS	37395427	37395452	21.5909	+	2	Parent=BnaC02g34760D
chrC02	GazeA2	CDS	37395224	37395348	37.952	+	0	Parent=BnaC02g34760D
chrC02	GazeA2	UTR	37395202	37395223	0.0386	+	.	Parent=BnaC02g34760D
chrC02	GazeA2	UTR	37394724	37394911	5.6364	+	.	Parent=BnaC02g34760D
chrC03	GazeA2	mRNA	921645	925529	223.286	-	.	ID=BnaC03g01930D;Name=BnaC03g01930D
chrC03	GazeA2	CDS	921645	921689	19.6369	-	0	Parent=BnaC03g01930D
chrC03	GazeA2	CDS	921776	921955	7.6369	-	0	Parent=BnaC03g01930D
chrC03	GazeA2	CDS	923795	924086	12.4932	-	2	Parent=BnaC03g01930D
chrC03	GazeA2	CDS	924183	924286	17.1	-	0	Parent=BnaC03g01930D
chrC03	GazeA2	CDS	924380	924492	17.3039	-	1	Parent=BnaC03g01930D
chrC03	GazeA2	CDS	924573	924650	17.1	-	1	Parent=BnaC03g01930D
chrC03	GazeA2	CDS	924734	924922	17	-	1	Parent=BnaC03g01930D
chrC03	GazeA2	CDS	924955	924976	-1	-	0	Parent=BnaC03g01930D
chrC03	GazeA2	UTR	924977	925071	2.8176	-	.	Parent=BnaC03g01930D
chrC03	GazeA2	UTR	925214	925259	6.1696	-	.	Parent=BnaC03g01930D
chrC03	GazeA2	UTR	925455	925529	2.9667	-	.	Parent=BnaC03g01930D
chrC03	GazeA2	mRNA	6676084	6677842	251.429	-	.	ID=BnaC03g13840D;Name=BnaC03g13840D
chrC03	GazeA2	UTR	6676084	6676361	4.3864	-	.	Parent=BnaC03g13840D
chrC03	GazeA2	CDS	6676362	6676505	30.5321	-	0	Parent=BnaC03g13840D
chrC03	GazeA2	CDS	6676889	6676993	33.2985	-	0	Parent=BnaC03g13840D
chrC03	GazeA2	CDS	6677117	6677244	27.0191	-	1	Parent=BnaC03g13840D
chrC03	GazeA2	CDS	6677414	6677508	45.169	-	2	Parent=BnaC03g13840D
chrC03	GazeA2	CDS	6677793	6677842	19.3236	-	0	Parent=BnaC03g13840D
chrC03	GazeA2	mRNA	7282058	7283590	243.228	+	.	ID=BnaC03g14940D;Name=BnaC03g14940D
chrC03	GazeA2	UTR	7283336	7283590	4.3396	+	.	Parent=BnaC03g14940D
chrC03	GazeA2	CDS	7283192	7283335	30.7744	+	0	Parent=BnaC03g14940D
chrC03	GazeA2	CDS	7282860	7282964	33.5327	+	0	Parent=BnaC03g14940D
chrC03	GazeA2	CDS	7282627	7282754	30.2619	+	1	Parent=BnaC03g14940D
chrC03	GazeA2	CDS	7282583	7282607	3.4657	+	0	Parent=BnaC03g14940D
chrC03	GazeA2	CDS	7282478	7282560	3.2657	+	1	Parent=BnaC03g14940D
chrC03	GazeA2	CDS	7282298	7282367	37.4129	+	0	Parent=BnaC03g14940D
chrC03	GazeA2	UTR	7282280	7282297	1.1264	+	.	Parent=BnaC03g14940D
chrC03	GazeA2	UTR	7282058	7282174	5.9107	+	.	Parent=BnaC03g14940D
chrC03	GazeA2	mRNA	8305702	8307373	269.482	+	.	ID=BnaC03g16350D;Name=BnaC03g16350D
chrC03	GazeA2	UTR	8305702	8305814	0.7368	+	.	Parent=BnaC03g16350D
chrC03	GazeA2	CDS	8305815	8305992	29.8842	+	0	Parent=BnaC03g16350D
chrC03	GazeA2	CDS	8306221	8306269	27.5	+	1	Parent=BnaC03g16350D
chrC03	GazeA2	CDS	8306593	8306752	31.5	+	2	Parent=BnaC03g16350D
chrC03	GazeA2	CDS	8306835	8306918	33.6	+	0	Parent=BnaC03g16350D
chrC03	GazeA2	CDS	8307007	8307114	30.9898	+	0	Parent=BnaC03g16350D
chrC03	GazeA2	UTR	8307115	8307373	7.4754	+	.	Parent=BnaC03g16350D
chrC03	GazeA2	mRNA	9284198	9285163	79.2143	-	.	ID=BnaC03g18130D;Name=BnaC03g18130D
chrC03	GazeA2	UTR	9284198	9284406	1.2276	-	.	Parent=BnaC03g18130D
chrC03	GazeA2	CDS	9284407	9284637	28.8273	-	0	Parent=BnaC03g18130D
chrC03	GazeA2	CDS	9284739	9285050	29.1	-	0	Parent=BnaC03g18130D
chrC03	GazeA2	UTR	9285051	9285163	0.0784	-	.	Parent=BnaC03g18130D
chrC03	GazeA2	mRNA	14348817	14350319	291.682	-	.	ID=BnaC03g25550D;Name=BnaC03g25550D
chrC03	GazeA2	UTR	14348817	14349030	5.5537	-	.	Parent=BnaC03g25550D
chrC03	GazeA2	CDS	14349031	14349173	29.9061	-	1	Parent=BnaC03g25550D
chrC03	GazeA2	CDS	14349264	14349392	33.6265	-	1	Parent=BnaC03g25550D
chrC03	GazeA2	CDS	14349490	14349542	22.5223	-	2	Parent=BnaC03g25550D
chrC03	GazeA2	CDS	14349623	14349737	27.3691	-	1	Parent=BnaC03g25550D
chrC03	GazeA2	CDS	14349940	14350019	22.6659	-	2	Parent=BnaC03g25550D
chrC03	GazeA2	CDS	14350142	14350185	26.0402	-	0	Parent=BnaC03g25550D
chrC03	GazeA2	UTR	14350186	14350319	3.1275	-	.	Parent=BnaC03g25550D
chrC03	GazeA2	mRNA	14351178	14352247	74.6969	-	.	ID=BnaC03g25560D;Name=BnaC03g25560D
chrC03	GazeA2	CDS	14351178	14351419	3.1168	-	1	Parent=BnaC03g25560D
chrC03	GazeA2	CDS	14351517	14351569	3.4168	-	2	Parent=BnaC03g25560D
chrC03	GazeA2	CDS	14351650	14351764	3.303	-	1	Parent=BnaC03g25560D
chrC03	GazeA2	CDS	14351967	14352046	4.9603	-	2	Parent=BnaC03g25560D
chrC03	GazeA2	CDS	14352170	14352213	15.3571	-	0	Parent=BnaC03g25560D
chrC03	GazeA2	UTR	14352214	14352247	0.6585	-	.	Parent=BnaC03g25560D
chrC03	GazeA2	mRNA	22004387	22005922	189.739	-	.	ID=BnaC03g36410D;Name=BnaC03g36410D
chrC03	GazeA2	UTR	22004387	22004597	2.2492	-	.	Parent=BnaC03g36410D
chrC03	GazeA2	CDS	22004598	22004741	28.8943	-	0	Parent=BnaC03g36410D
chrC03	GazeA2	CDS	22004820	22004924	28.9125	-	0	Parent=BnaC03g36410D
chrC03	GazeA2	CDS	22005029	22005156	28.8221	-	1	Parent=BnaC03g36410D
chrC03	GazeA2	CDS	22005633	22005702	33.3454	-	0	Parent=BnaC03g36410D
chrC03	GazeA2	UTR	22005703	22005721	0.6891	-	.	Parent=BnaC03g36410D
chrC03	GazeA2	UTR	22005836	22005922	2.9507	-	.	Parent=BnaC03g36410D
chrC03	GazeA2	mRNA	24093324	24096709	183.122	+	.	ID=BnaC03g39070D;Name=BnaC03g39070D
chrC03	GazeA2	CDS	24093324	24093433	-0.9	+	0	Parent=BnaC03g39070D
chrC03	GazeA2	CDS	24094298	24094349	6.2038	+	2	Parent=BnaC03g39070D
chrC03	GazeA2	CDS	24094684	24094803	11.1	+	0	Parent=BnaC03g39070D
chrC03	GazeA2	CDS	24094888	24095176	5.5975	+	0	Parent=BnaC03g39070D
chrC03	GazeA2	CDS	24095441	24095553	11.0624	+	1	Parent=BnaC03g39070D
chrC03	GazeA2	CDS	24095637	24095700	10.9119	+	0	Parent=BnaC03g39070D
chrC03	GazeA2	CDS	24095781	24095920	10.9303	+	1	Parent=BnaC03g39070D
chrC03	GazeA2	CDS	24096000	24096293	10.9	+	0	Parent=BnaC03g39070D
chrC03	GazeA2	CDS	24096389	24096487	10.9444	+	0	Parent=BnaC03g39070D
chrC03	GazeA2	CDS	24096587	24096709	22.9764	+	0	Parent=BnaC03g39070D
chrC03	GazeA2	mRNA	28958706	28960733	82.5267	-	.	ID=BnaC03g43880D;Name=BnaC03g43880D
chrC03	GazeA2	CDS	28960530	28960733	20.201	-	0	Parent=BnaC03g43880D
chrC03	GazeA2	CDS	28959844	28959942	8.301	-	0	Parent=BnaC03g43880D
chrC03	GazeA2	CDS	28959614	28959757	10.5991	-	0	Parent=BnaC03g43880D
chrC03	GazeA2	CDS	28958808	28959536	9.1699	-	0	Parent=BnaC03g43880D
chrC03	GazeA2	UTR	28958706	28958807	1.4933	-	.	Parent=BnaC03g43880D
chrC03	GazeA2	mRNA	28988462	28990134	45.3117	-	.	ID=BnaC03g43920D;Name=BnaC03g43920D
chrC03	GazeA2	UTR	28989969	28990134	1.3373	-	.	Parent=BnaC03g43920D
chrC03	GazeA2	CDS	28989906	28989968	-1	-	0	Parent=BnaC03g43920D
chrC03	GazeA2	CDS	28989460	28989558	9.8225	-	0	Parent=BnaC03g43920D
chrC03	GazeA2	CDS	28989217	28989360	5.1774	-	0	Parent=BnaC03g43920D
chrC03	GazeA2	CDS	28988462	28988998	5.1774	-	0	Parent=BnaC03g43920D
chrC03	GazeA2	mRNA	28991393	28993483	272.747	-	.	ID=BnaC03g43940D;Name=BnaC03g43940D
chrC03	GazeA2	UTR	28993317	28993483	3.1132	-	.	Parent=BnaC03g43940D
chrC03	GazeA2	CDS	28993169	28993316	30.4334	-	0	Parent=BnaC03g43940D
chrC03	GazeA2	CDS	28993012	28993084	16.8823	-	1	Parent=BnaC03g43940D
chrC03	GazeA2	CDS	28992819	28992924	21.4	-	2	Parent=BnaC03g43940D
chrC03	GazeA2	CDS	28992488	28992586	21.6	-	0	Parent=BnaC03g43940D
chrC03	GazeA2	CDS	28992258	28992401	26.5604	-	0	Parent=BnaC03g43940D
chrC03	GazeA2	CDS	28991452	28992180	34.0465	-	0	Parent=BnaC03g43940D
chrC03	GazeA2	UTR	28991393	28991451	-0.1691	-	.	Parent=BnaC03g43940D
chrC03	GazeA2	mRNA	31602173	31603167	147.042	+	.	ID=BnaC03g46610D;Name=BnaC03g46610D
chrC03	GazeA2	CDS	31602173	31602242	26.7826	+	0	Parent=BnaC03g46610D
chrC03	GazeA2	CDS	31602381	31602508	17.0469	+	1	Parent=BnaC03g46610D
chrC03	GazeA2	CDS	31602622	31602726	15.5314	+	0	Parent=BnaC03g46610D
chrC03	GazeA2	CDS	31602833	31602976	24.1135	+	0	Parent=BnaC03g46610D
chrC03	GazeA2	UTR	31602977	31603167	3.6461	+	.	Parent=BnaC03g46610D
chrC03	GazeA2	mRNA	31687495	31692290	315.653	-	.	ID=BnaC03g46750D;Name=BnaC03g46750D
chrC03	GazeA2	UTR	31687495	31687649	0.3612	-	.	Parent=BnaC03g46750D
chrC03	GazeA2	CDS	31687650	31687907	26.9482	-	0	Parent=BnaC03g46750D
chrC03	GazeA2	CDS	31688013	31688324	16.9	-	0	Parent=BnaC03g46750D
chrC03	GazeA2	CDS	31688416	31688555	19.0785	-	1	Parent=BnaC03g46750D
chrC03	GazeA2	CDS	31688647	31688716	17.1	-	0	Parent=BnaC03g46750D
chrC03	GazeA2	CDS	31688830	31688924	17.4363	-	1	Parent=BnaC03g46750D
chrC03	GazeA2	CDS	31689021	31689276	-1	-	0	Parent=BnaC03g46750D
chrC03	GazeA2	CDS	31689378	31689506	22.9705	-	0	Parent=BnaC03g46750D
chrC03	GazeA2	CDS	31689874	31691673	24.2325	-	0	Parent=BnaC03g46750D
chrC03	GazeA2	CDS	31691728	31691811	23	-	0	Parent=BnaC03g46750D
chrC03	GazeA2	UTR	31692148	31692290	2.876	-	.	Parent=BnaC03g46750D
chrC03	GazeA2	mRNA	52491651	52504693	28.9905	+	.	ID=BnaC03g63160D;Name=BnaC03g63160D
chrC03	GazeA2	CDS	52491651	52491697	-1.032	+	0	Parent=BnaC03g63160D
chrC03	GazeA2	CDS	52491766	52491898	5.8871	+	2	Parent=BnaC03g63160D
chrC03	GazeA2	CDS	52498531	52498602	6.0994	+	0	Parent=BnaC03g63160D
chrC03	GazeA2	CDS	52503586	52503616	-1.022	+	0	Parent=BnaC03g63160D
chrC03	GazeA2	CDS	52503660	52503679	-1.0142	+	1	Parent=BnaC03g63160D
chrC03	GazeA2	CDS	52504535	52504693	1.1069	+	0	Parent=BnaC03g63160D
chrC03	GazeA2	mRNA	58345101	58345774	67.5046	-	.	ID=BnaC03g68670D;Name=BnaC03g68670D
chrC03	GazeA2	CDS	58345101	58345132	13.4661	-	1	Parent=BnaC03g68670D
chrC03	GazeA2	CDS	58345229	58345288	1.2812	-	1	Parent=BnaC03g68670D
chrC03	GazeA2	CDS	58345373	58345383	-2	-	2	Parent=BnaC03g68670D
chrC03	GazeA2	CDS	58345413	58345436	-1	-	2	Parent=BnaC03g68670D
chrC03	GazeA2	CDS	58345523	58345650	3.5433	-	0	Parent=BnaC03g68670D
chrC03	GazeA2	CDS	58345673	58345774	15.5132	-	0	Parent=BnaC03g68670D
chrC03	GazeA2	mRNA	58756769	58759799	338.512	+	.	ID=BnaC03g69050D;Name=BnaC03g69050D
chrC03	GazeA2	UTR	58756769	58756808	0.3978	+	.	Parent=BnaC03g69050D
chrC03	GazeA2	CDS	58756809	58756880	26.7632	+	0	Parent=BnaC03g69050D
chrC03	GazeA2	CDS	58757452	58757958	39.3885	+	0	Parent=BnaC03g69050D
chrC03	GazeA2	CDS	58758046	58758109	27.2644	+	0	Parent=BnaC03g69050D
chrC03	GazeA2	CDS	58758191	58758330	27.3342	+	1	Parent=BnaC03g69050D
chrC03	GazeA2	CDS	58758403	58758714	35.9089	+	0	Parent=BnaC03g69050D
chrC03	GazeA2	CDS	58758876	58759183	29.441	+	0	Parent=BnaC03g69050D
chrC03	GazeA2	CDS	58759633	58759678	10.8772	+	2	Parent=BnaC03g69050D
chrC03	GazeA2	UTR	58759679	58759799	2.5801	+	.	Parent=BnaC03g69050D
chrC04	GazeA2	mRNA	7749576	7750026	17.8265	-	.	ID=BnaC04g10080D;Name=BnaC04g10080D
chrC04	GazeA2	CDS	7749576	7749652	10.8913	-	1	Parent=BnaC04g10080D
chrC04	GazeA2	CDS	7749900	7750026	11.0132	-	0	Parent=BnaC04g10080D
chrC04	GazeA2	mRNA	25037365	25039352	210.086	+	.	ID=BnaC04g23980D;Name=BnaC04g23980D
chrC04	GazeA2	UTR	25037365	25037436	3.5127	+	.	Parent=BnaC04g23980D
chrC04	GazeA2	CDS	25037437	25037505	28.275	+	0	Parent=BnaC04g23980D
chrC04	GazeA2	CDS	25037603	25037686	17.1	+	0	Parent=BnaC04g23980D
chrC04	GazeA2	CDS	25038607	25038759	26.8167	+	0	Parent=BnaC04g23980D
chrC04	GazeA2	CDS	25038848	25038961	16.907	+	0	Parent=BnaC04g23980D
chrC04	GazeA2	CDS	25039063	25039125	29	+	0	Parent=BnaC04g23980D
chrC04	GazeA2	UTR	25039126	25039352	8.8742	+	.	Parent=BnaC04g23980D
chrC04	GazeA2	mRNA	26667230	26669111	270.935	-	.	ID=BnaC04g25550D;Name=BnaC04g25550D
chrC04	GazeA2	UTR	26668997	26669111	7.6376	-	.	Parent=BnaC04g25550D
chrC04	GazeA2	CDS	26668951	26668996	29.6831	-	0	Parent=BnaC04g25550D
chrC04	GazeA2	CDS	26668697	26668799	31.946	-	1	Parent=BnaC04g25550D
chrC04	GazeA2	CDS	26668064	26668161	27.6	-	2	Parent=BnaC04g25550D
chrC04	GazeA2	CDS	26667878	26667978	27.5	-	1	Parent=BnaC04g25550D
chrC04	GazeA2	CDS	26667463	26667618	30.8235	-	0	Parent=BnaC04g25550D
chrC04	GazeA2	UTR	26667230	26667462	8.0731	-	.	Parent=BnaC04g25550D
chrC04	GazeA2	mRNA	29525167	29526679	173.746	+	.	ID=BnaC04g28100D;Name=BnaC04g28100D
chrC04	GazeA2	UTR	29526279	29526679	3.0373	+	.	Parent=BnaC04g28100D
chrC04	GazeA2	CDS	29526138	29526278	29.2	+	0	Parent=BnaC04g28100D
chrC04	GazeA2	CDS	29525931	29526056	23	+	0	Parent=BnaC04g28100D
chrC04	GazeA2	CDS	29525524	29525663	27.9876	+	1	Parent=BnaC04g28100D
chrC04	GazeA2	CDS	29525245	29525278	27.7773	+	0	Parent=BnaC04g28100D
chrC04	GazeA2	UTR	29525167	29525244	2.9176	+	.	Parent=BnaC04g28100D
chrC04	GazeA2	mRNA	38933580	38935207	163.767	-	.	ID=BnaC04g37650D;Name=BnaC04g37650D
chrC04	GazeA2	UTR	38933580	38933828	1.9009	-	.	Parent=BnaC04g37650D
chrC04	GazeA2	CDS	38933829	38933972	28.9044	-	0	Parent=BnaC04g37650D
chrC04	GazeA2	CDS	38934304	38934408	16.9125	-	0	Parent=BnaC04g37650D
chrC04	GazeA2	CDS	38934482	38934609	16.9061	-	1	Parent=BnaC04g37650D
chrC04	GazeA2	CDS	38934742	38934811	32.4333	-	0	Parent=BnaC04g37650D
chrC04	GazeA2	UTR	38934812	38934831	-0.1111	-	.	Parent=BnaC04g37650D
chrC04	GazeA2	UTR	38935138	38935207	2.9733	-	.	Parent=BnaC04g37650D
chrC04	GazeA2	mRNA	44271614	44274978	389.828	-	.	ID=BnaC04g44130D;Name=BnaC04g44130D
chrC04	GazeA2	CDS	44273677	44274978	33.2744	-	0	Parent=BnaC04g44130D
chrC04	GazeA2	CDS	44273426	44273563	27.6	-	0	Parent=BnaC04g44130D
chrC04	GazeA2	CDS	44273069	44273320	11	-	0	Parent=BnaC04g44130D
chrC04	GazeA2	CDS	44272913	44273014	17	-	0	Parent=BnaC04g44130D
chrC04	GazeA2	CDS	44272767	44272830	21.6	-	0	Parent=BnaC04g44130D
chrC04	GazeA2	CDS	44272531	44272670	33.6	-	1	Parent=BnaC04g44130D
chrC04	GazeA2	CDS	44272130	44272441	37.5537	-	0	Parent=BnaC04g44130D
chrC04	GazeA2	CDS	44271808	44272041	31.5195	-	0	Parent=BnaC04g44130D
chrC04	GazeA2	UTR	44271614	44271807	3.7806	-	.	Parent=BnaC04g44130D
chrC04	GazeA2	mRNA	48203082	48204434	284.332	-	.	ID=BnaC04g50680D;Name=BnaC04g50680D
chrC04	GazeA2	UTR	48204364	48204434	2.4266	-	.	Parent=BnaC04g50680D
chrC04	GazeA2	CDS	48204320	48204363	31.205	-	0	Parent=BnaC04g50680D
chrC04	GazeA2	CDS	48204126	48204205	19.8973	-	2	Parent=BnaC04g50680D
chrC04	GazeA2	CDS	48203847	48203961	31.6038	-	1	Parent=BnaC04g50680D
chrC04	GazeA2	CDS	48203707	48203759	17.8718	-	2	Parent=BnaC04g50680D
chrC04	GazeA2	CDS	48203484	48203612	17.9718	-	1	Parent=BnaC04g50680D
chrC04	GazeA2	CDS	48203257	48203405	25.3436	-	1	Parent=BnaC04g50680D
chrC04	GazeA2	UTR	48203082	48203256	3.1203	-	.	Parent=BnaC04g50680D
chrC05	GazeA2	mRNA	6121805	6123462	218.853	-	.	ID=BnaC05g10640D;Name=BnaC05g10640D
chrC05	GazeA2	UTR	6122864	6123462	10.6825	-	.	Parent=BnaC05g10640D
chrC05	GazeA2	CDS	6122739	6122863	34.1325	-	0	Parent=BnaC05g10640D
chrC05	GazeA2	CDS	6122615	6122640	17.0913	-	2	Parent=BnaC05g10640D
chrC05	GazeA2	CDS	6122428	6122517	17.0697	-	1	Parent=BnaC05g10640D
chrC05	GazeA2	CDS	6122235	6122323	22.9735	-	1	Parent=BnaC05g10640D
chrC05	GazeA2	CDS	6122038	6122166	29.0732	-	0	Parent=BnaC05g10640D
chrC05	GazeA2	UTR	6121805	6122037	7.8911	-	.	Parent=BnaC05g10640D
chrC05	GazeA2	mRNA	7494040	7496219	407.849	-	.	ID=BnaC05g12900D;Name=BnaC05g12900D
chrC05	GazeA2	UTR	7496109	7496219	5.4596	-	.	Parent=BnaC05g12900D
chrC05	GazeA2	CDS	7496073	7496108	28.4837	-	0	Parent=BnaC05g12900D
chrC05	GazeA2	CDS	7495840	7495867	21.5749	-	0	Parent=BnaC05g12900D
chrC05	GazeA2	CDS	7495655	7495741	29.9476	-	1	Parent=BnaC05g12900D
chrC05	GazeA2	CDS	7495200	7495258	27.5252	-	1	Parent=BnaC05g12900D
chrC05	GazeA2	CDS	7494834	7494875	21.5777	-	0	Parent=BnaC05g12900D
chrC05	GazeA2	CDS	7494669	7494742	21.5607	-	0	Parent=BnaC05g12900D
chrC05	GazeA2	CDS	7494441	7494538	27.5	-	2	Parent=BnaC05g12900D
chrC05	GazeA2	CDS	7494302	7494339	25.1736	-	1	Parent=BnaC05g12900D
chrC05	GazeA2	UTR	7494040	7494301	10.4372	-	.	Parent=BnaC05g12900D
chrC05	GazeA2	mRNA	7745875	7748485	468.525	-	.	ID=BnaC05g13430D;Name=BnaC05g13430D
chrC05	GazeA2	UTR	7745875	7746157	2.5667	-	.	Parent=BnaC05g13430D
chrC05	GazeA2	CDS	7746158	7746428	31.4488	-	2	Parent=BnaC05g13430D
chrC05	GazeA2	CDS	7746621	7746712	33.5505	-	0	Parent=BnaC05g13430D
chrC05	GazeA2	CDS	7746875	7746902	21.338	-	2	Parent=BnaC05g13430D
chrC05	GazeA2	CDS	7746979	7747018	21.6	-	1	Parent=BnaC05g13430D
chrC05	GazeA2	CDS	7747104	7747165	27.356	-	2	Parent=BnaC05g13430D
chrC05	GazeA2	CDS	7747258	7747321	26.8744	-	1	Parent=BnaC05g13430D
chrC05	GazeA2	CDS	7747413	7747451	21.483	-	1	Parent=BnaC05g13430D
chrC05	GazeA2	CDS	7747573	7747627	20.6676	-	0	Parent=BnaC05g13430D
chrC05	GazeA2	CDS	7747718	7747774	35.403	-	0	Parent=BnaC05g13430D
chrC05	GazeA2	UTR	7747775	7748485	10.4301	-	.	Parent=BnaC05g13430D
chrC05	GazeA2	mRNA	12282883	12284597	185.392	-	.	ID=BnaC05g18550D;Name=BnaC05g18550D
chrC05	GazeA2	UTR	12284491	12284597	4.7167	-	.	Parent=BnaC05g18550D
chrC05	GazeA2	CDS	12284463	12284490	26.8338	-	0	Parent=BnaC05g18550D
chrC05	GazeA2	CDS	12284165	12284304	23.0511	-	1	Parent=BnaC05g18550D
chrC05	GazeA2	CDS	12283505	12283630	17.1	-	0	Parent=BnaC05g18550D
chrC05	GazeA2	CDS	12283282	12283412	21.1744	-	0	Parent=BnaC05g18550D
chrC05	GazeA2	CDS	12283191	12283210	-1	-	2	Parent=BnaC05g18550D
chrC05	GazeA2	CDS	12283070	12283125	23.9199	-	1	Parent=BnaC05g18550D
chrC05	GazeA2	UTR	12282883	12283069	2.8583	-	.	Parent=BnaC05g18550D
chrC05	GazeA2	mRNA	20258236	20260050	234.582	+	.	ID=BnaC05g25370D;Name=BnaC05g25370D
chrC05	GazeA2	UTR	20258236	20258314	2.1782	+	.	Parent=BnaC05g25370D
chrC05	GazeA2	CDS	20258315	20258344	20.6477	+	0	Parent=BnaC05g25370D
chrC05	GazeA2	CDS	20258451	20258554	38.0232	+	0	Parent=BnaC05g25370D
chrC05	GazeA2	CDS	20258638	20258744	10.8328	+	2	Parent=BnaC05g25370D
chrC05	GazeA2	CDS	20258937	20258956	-1	+	1	Parent=BnaC05g25370D
chrC05	GazeA2	CDS	20258991	20259054	23.1	+	0	Parent=BnaC05g25370D
chrC05	GazeA2	CDS	20259596	20259684	24.0562	+	1	Parent=BnaC05g25370D
chrC05	GazeA2	CDS	20259765	20259860	29.1	+	0	Parent=BnaC05g25370D
chrC05	GazeA2	UTR	20259861	20260050	2.0823	+	.	Parent=BnaC05g25370D
chrC05	GazeA2	mRNA	24448189	24449773	23.8063	+	.	ID=BnaC05g27450D;Name=BnaC05g27450D
chrC05	GazeA2	CDS	24449681	24449773	9.249	+	0	Parent=BnaC05g27450D
chrC05	GazeA2	CDS	24449033	24449182	9.0942	+	0	Parent=BnaC05g27450D
chrC05	GazeA2	CDS	24448189	24448224	-1.0529	+	0	Parent=BnaC05g27450D
chrC05	GazeA2	mRNA	24802524	24803217	97.5004	-	.	ID=BnaC05g27600D;Name=BnaC05g27600D
chrC05	GazeA2	CDS	24803125	24803217	18.211	-	0	Parent=BnaC05g27600D
chrC05	GazeA2	CDS	24802910	24803014	17.1	-	0	Parent=BnaC05g27600D
chrC05	GazeA2	CDS	24802684	24802821	23.7492	-	0	Parent=BnaC05g27600D
chrC05	GazeA2	UTR	24802524	24802683	-1.5235	-	.	Parent=BnaC05g27600D
chrC05	GazeA2	mRNA	24805831	24807246	76.8	-	.	ID=BnaC05g27620D;Name=BnaC05g27620D
chrC05	GazeA2	CDS	24807161	24807246	23	-	0	Parent=BnaC05g27620D
chrC05	GazeA2	CDS	24806721	24806766	-1	-	2	Parent=BnaC05g27620D
chrC05	GazeA2	CDS	24806515	24806610	11	-	0	Parent=BnaC05g27620D
chrC05	GazeA2	CDS	24806336	24806417	3.0361	-	0	Parent=BnaC05g27620D
chrC05	GazeA2	CDS	24805831	24806015	3.0488	-	1	Parent=BnaC05g27620D
chrC05	GazeA2	mRNA	32053075	32054714	256.623	+	.	ID=BnaC05g32470D;Name=BnaC05g32470D
chrC05	GazeA2	UTR	32053075	32053269	3.2448	+	.	Parent=BnaC05g32470D
chrC05	GazeA2	CDS	32053270	32053391	23	+	0	Parent=BnaC05g32470D
chrC05	GazeA2	CDS	32053760	32053787	21.6	+	2	Parent=BnaC05g32470D
chrC05	GazeA2	CDS	32053861	32054088	27.2339	+	0	Parent=BnaC05g32470D
chrC05	GazeA2	CDS	32054211	32054274	27.6	+	0	Parent=BnaC05g32470D
chrC05	GazeA2	CDS	32054354	32054413	15.4151	+	1	Parent=BnaC05g32470D
chrC05	GazeA2	CDS	32054517	32054563	29.9508	+	1	Parent=BnaC05g32470D
chrC05	GazeA2	UTR	32054564	32054714	4.7706	+	.	Parent=BnaC05g32470D
chrC05	GazeA2	mRNA	37006075	37008770	196.969	-	.	ID=BnaC05g38230D;Name=BnaC05g38230D
chrC05	GazeA2	UTR	37008692	37008770	1.2265	-	.	Parent=BnaC05g38230D
chrC05	GazeA2	CDS	37008632	37008691	25.6819	-	0	Parent=BnaC05g38230D
chrC05	GazeA2	CDS	37007922	37008047	28.7674	-	0	Parent=BnaC05g38230D
chrC05	GazeA2	CDS	37007161	37007838	23.2805	-	0	Parent=BnaC05g38230D
chrC05	GazeA2	CDS	37007007	37007070	11.1	-	0	Parent=BnaC05g38230D
chrC05	GazeA2	CDS	37006431	37006885	11.1	-	1	Parent=BnaC05g38230D
chrC05	GazeA2	CDS	37006075	37006326	23.1	-	0	Parent=BnaC05g38230D
chrC05	GazeA2	mRNA	38200614	38202056	157.381	+	.	ID=BnaC05g39770D;Name=BnaC05g39770D
chrC05	GazeA2	UTR	38201776	38202056	2.7824	+	.	Parent=BnaC05g39770D
chrC05	GazeA2	CDS	38201678	38201775	29.0394	+	1	Parent=BnaC05g39770D
chrC05	GazeA2	CDS	38201409	38201556	17.1	+	0	Parent=BnaC05g39770D
chrC05	GazeA2	CDS	38200996	38201069	22.9556	+	1	Parent=BnaC05g39770D
chrC05	GazeA2	CDS	38200684	38200915	25.7136	+	0	Parent=BnaC05g39770D
chrC05	GazeA2	UTR	38200614	38200683	-0.057	+	.	Parent=BnaC05g39770D
chrC05	GazeA2	mRNA	40485410	40486751	228.687	-	.	ID=BnaC05g43870D;Name=BnaC05g43870D
chrC05	GazeA2	UTR	40485410	40485633	2.0548	-	.	Parent=BnaC05g43870D
chrC05	GazeA2	CDS	40485634	40485777	31.1984	-	0	Parent=BnaC05g43870D
chrC05	GazeA2	CDS	40485851	40485955	33.2308	-	0	Parent=BnaC05g43870D
chrC05	GazeA2	CDS	40486051	40486178	27.4061	-	1	Parent=BnaC05g43870D
chrC05	GazeA2	CDS	40486526	40486595	37.3584	-	0	Parent=BnaC05g43870D
chrC05	GazeA2	UTR	40486596	40486614	0.4944	-	.	Parent=BnaC05g43870D
chrC05	GazeA2	UTR	40486702	40486751	6	-	.	Parent=BnaC05g43870D
chrC05_random	GazeA2	mRNA	2157447	2158734	280.116	+	.	ID=BnaC05g51200D;Name=BnaC05g51200D
chrC05_random	GazeA2	UTR	2157447	2157527	1.9855	+	.	Parent=BnaC05g51200D
chrC05_random	GazeA2	CDS	2157528	2157625	31.4812	+	0	Parent=BnaC05g51200D
chrC05_random	GazeA2	CDS	2157776	2157803	21.6	+	2	Parent=BnaC05g51200D
chrC05_random	GazeA2	CDS	2157874	2158101	27.3434	+	0	Parent=BnaC05g51200D
chrC05_random	GazeA2	CDS	2158208	2158274	11	+	0	Parent=BnaC05g51200D
chrC05_random	GazeA2	CDS	2158352	2158411	27.4151	+	1	Parent=BnaC05g51200D
chrC05_random	GazeA2	CDS	2158495	2158541	33.4505	+	1	Parent=BnaC05g51200D
chrC05_random	GazeA2	UTR	2158542	2158734	6.9275	+	.	Parent=BnaC05g51200D
chrC06	GazeA2	mRNA	1751136	1752987	200.629	+	.	ID=BnaC06g01080D;Name=BnaC06g01080D
chrC06	GazeA2	UTR	1751136	1751176	2.0275	+	.	Parent=BnaC06g01080D
chrC06	GazeA2	CDS	1751177	1751206	29.0375	+	0	Parent=BnaC06g01080D
chrC06	GazeA2	CDS	1751307	1751410	27.4603	+	0	Parent=BnaC06g01080D
chrC06	GazeA2	CDS	1751493	1751599	5.3012	+	2	Parent=BnaC06g01080D
chrC06	GazeA2	CDS	1751852	1751911	5.3936	+	1	Parent=BnaC06g01080D
chrC06	GazeA2	CDS	1752598	1752686	12.5081	+	1	Parent=BnaC06g01080D
chrC06	GazeA2	CDS	1752769	1752864	26.6857	+	0	Parent=BnaC06g01080D
chrC06	GazeA2	UTR	1752865	1752987	1.5914	+	.	Parent=BnaC06g01080D
chrC06	GazeA2	mRNA	4358145	4359574	232.049	-	.	ID=BnaC06g03670D;Name=BnaC06g03670D
chrC06	GazeA2	UTR	4359500	4359574	1.9805	-	.	Parent=BnaC06g03670D
chrC06	GazeA2	CDS	4359381	4359499	27.9143	-	0	Parent=BnaC06g03670D
chrC06	GazeA2	CDS	4359059	4359086	17.1	-	2	Parent=BnaC06g03670D
chrC06	GazeA2	CDS	4358721	4358948	23.1	-	0	Parent=BnaC06g03670D
chrC06	GazeA2	CDS	4358578	4358641	17.0767	-	0	Parent=BnaC06g03670D
chrC06	GazeA2	CDS	4358419	4358478	17.1	-	1	Parent=BnaC06g03670D
chrC06	GazeA2	CDS	4358283	4358329	25.2364	-	1	Parent=BnaC06g03670D
chrC06	GazeA2	UTR	4358145	4358282	2.7032	-	.	Parent=BnaC06g03670D
chrC06	GazeA2	mRNA	6583709	6585918	279.868	-	.	ID=BnaC06g06060D;Name=BnaC06g06060D
chrC06	GazeA2	CDS	6585847	6585918	29.1	-	0	Parent=BnaC06g06060D
chrC06	GazeA2	CDS	6584951	6585577	38.5857	-	0	Parent=BnaC06g06060D
chrC06	GazeA2	CDS	6584715	6584778	21.168	-	0	Parent=BnaC06g06060D
chrC06	GazeA2	CDS	6584495	6584634	16.1342	-	1	Parent=BnaC06g06060D
chrC06	GazeA2	CDS	6584095	6584406	27.082	-	0	Parent=BnaC06g06060D
chrC06	GazeA2	CDS	6583709	6584020	26.9647	-	0	Parent=BnaC06g06060D
chrC06	GazeA2	mRNA	12527252	12529356	23.9715	+	.	ID=BnaC06g10370D;Name=BnaC06g10370D
chrC06	GazeA2	CDS	12527252	12527359	-1.018	+	0	Parent=BnaC06g10370D
chrC06	GazeA2	CDS	12527445	12527756	4.271	+	0	Parent=BnaC06g10370D
chrC06	GazeA2	CDS	12527829	12527919	4.2975	+	0	Parent=BnaC06g10370D
chrC06	GazeA2	CDS	12529322	12529356	-1.0146	+	1	Parent=BnaC06g10370D
chrC06	GazeA2	mRNA	13210904	13212313	194.191	+	.	ID=BnaC06g11310D;Name=BnaC06g11310D
chrC06	GazeA2	UTR	13211943	13212313	4.4655	+	.	Parent=BnaC06g11310D
chrC06	GazeA2	CDS	13211802	13211942	30.5962	+	0	Parent=BnaC06g11310D
chrC06	GazeA2	CDS	13211591	13211716	27.6	+	0	Parent=BnaC06g11310D
chrC06	GazeA2	CDS	13211282	13211421	22.9299	+	1	Parent=BnaC06g11310D
chrC06	GazeA2	CDS	13211035	13211068	22.1391	+	0	Parent=BnaC06g11310D
chrC06	GazeA2	UTR	13210904	13211034	5.5838	+	.	Parent=BnaC06g11310D
chrC06	GazeA2	mRNA	19129487	19131288	264.368	-	.	ID=BnaC06g16140D;Name=BnaC06g16140D
chrC06	GazeA2	UTR	19129487	19129726	6.4096	-	.	Parent=BnaC06g16140D
chrC06	GazeA2	CDS	19129727	19129789	29.9963	-	0	Parent=BnaC06g16140D
chrC06	GazeA2	CDS	19129898	19130011	27.407	-	0	Parent=BnaC06g16140D
chrC06	GazeA2	CDS	19130091	19130243	27.4171	-	0	Parent=BnaC06g16140D
chrC06	GazeA2	CDS	19130839	19130922	21.6	-	0	Parent=BnaC06g16140D
chrC06	GazeA2	CDS	19131011	19131079	37.6875	-	0	Parent=BnaC06g16140D
chrC06	GazeA2	UTR	19131080	19131288	6.1148	-	.	Parent=BnaC06g16140D
chrC06	GazeA2	mRNA	22342377	22344309	328.493	-	.	ID=BnaC06g20310D;Name=BnaC06g20310D
chrC06	GazeA2	UTR	22344136	22344309	9.762	-	.	Parent=BnaC06g20310D
chrC06	GazeA2	CDS	22344100	22344135	21.5284	-	0	Parent=BnaC06g20310D
chrC06	GazeA2	CDS	22343994	22344021	27.3487	-	0	Parent=BnaC06g20310D
chrC06	GazeA2	CDS	22343819	22343905	19.42	-	1	Parent=BnaC06g20310D
chrC06	GazeA2	CDS	22343354	22343423	7.0765	-	1	Parent=BnaC06g20310D
chrC06	GazeA2	CDS	22343019	22343100	7.4867	-	2	Parent=BnaC06g20310D
chrC06	GazeA2	CDS	22342854	22342927	17.6275	-	0	Parent=BnaC06g20310D
chrC06	GazeA2	CDS	22342668	22342765	17.6767	-	2	Parent=BnaC06g20310D
chrC06	GazeA2	CDS	22342538	22342575	22.6573	-	1	Parent=BnaC06g20310D
chrC06	GazeA2	UTR	22342377	22342537	5.1953	-	.	Parent=BnaC06g20310D
chrC06	GazeA2	mRNA	28727479	28728149	53.1604	+	.	ID=BnaC06g27370D;Name=BnaC06g27370D
chrC06	GazeA2	CDS	28727997	28728149	13.7894	+	0	Parent=BnaC06g27370D
chrC06	GazeA2	CDS	28727776	28727903	1.8927	+	1	Parent=BnaC06g27370D
chrC06	GazeA2	CDS	28727479	28727548	15.564	+	0	Parent=BnaC06g27370D
chrC06	GazeA2	mRNA	34799747	34801759	284.87	+	.	ID=BnaC06g36210D;Name=BnaC06g36210D
chrC06	GazeA2	UTR	34799747	34799865	7.7269	+	.	Parent=BnaC06g36210D
chrC06	GazeA2	CDS	34799866	34799895	23.9474	+	0	Parent=BnaC06g36210D
chrC06	GazeA2	CDS	34799993	34800096	16.6553	+	0	Parent=BnaC06g36210D
chrC06	GazeA2	CDS	34800175	34800277	21.4038	+	2	Parent=BnaC06g36210D
chrC06	GazeA2	CDS	34800664	34800727	21.6	+	0	Parent=BnaC06g36210D
chrC06	GazeA2	CDS	34801322	34801410	21.412	+	1	Parent=BnaC06g36210D
chrC06	GazeA2	CDS	34801505	34801600	31.4088	+	0	Parent=BnaC06g36210D
chrC06	GazeA2	UTR	34801601	34801759	6.1109	+	.	Parent=BnaC06g36210D
chrC06	GazeA2	mRNA	36475629	36477713	419.195	+	.	ID=BnaC06g39290D;Name=BnaC06g39290D
chrC06	GazeA2	UTR	36475629	36475760	6.2695	+	.	Parent=BnaC06g39290D
chrC06	GazeA2	CDS	36475761	36475796	29.182	+	0	Parent=BnaC06g39290D
chrC06	GazeA2	CDS	36475888	36475915	21.6	+	0	Parent=BnaC06g39290D
chrC06	GazeA2	CDS	36476076	36476162	35.9305	+	1	Parent=BnaC06g39290D
chrC06	GazeA2	CDS	36476548	36476606	21.5235	+	1	Parent=BnaC06g39290D
chrC06	GazeA2	CDS	36476966	36477007	21.492	+	0	Parent=BnaC06g39290D
chrC06	GazeA2	CDS	36477098	36477171	27.2488	+	0	Parent=BnaC06g39290D
chrC06	GazeA2	CDS	36477279	36477376	27.4072	+	2	Parent=BnaC06g39290D
chrC06	GazeA2	CDS	36477474	36477511	29.7496	+	1	Parent=BnaC06g39290D
chrC06	GazeA2	UTR	36477512	36477713	10.1594	+	.	Parent=BnaC06g39290D
chrC06_random	GazeA2	mRNA	1049487	1051324	238.177	-	.	ID=BnaC06g41780D;Name=BnaC06g41780D
chrC06_random	GazeA2	CDS	1049487	1049789	26.0621	-	0	Parent=BnaC06g41780D
chrC06_random	GazeA2	CDS	1049866	1050177	16.9089	-	0	Parent=BnaC06g41780D
chrC06_random	GazeA2	CDS	1050267	1050406	16.9486	-	1	Parent=BnaC06g41780D
chrC06_random	GazeA2	CDS	1050477	1050540	16.9463	-	0	Parent=BnaC06g41780D
chrC06_random	GazeA2	CDS	1050631	1051023	34.915	-	0	Parent=BnaC06g41780D
chrC06_random	GazeA2	CDS	1051206	1051277	25.7799	-	0	Parent=BnaC06g41780D
chrC06_random	GazeA2	UTR	1051278	1051324	0.7116	-	.	Parent=BnaC06g41780D
chrC06_random	GazeA2	mRNA	1336999	1338220	111.905	+	.	ID=BnaC06g41980D;Name=BnaC06g41980D
chrC06_random	GazeA2	CDS	1336999	1337022	23.1	+	0	Parent=BnaC06g41980D
chrC06_random	GazeA2	CDS	1337369	1337551	17.0084	+	0	Parent=BnaC06g41980D
chrC06_random	GazeA2	CDS	1337642	1337705	10.9482	+	0	Parent=BnaC06g41980D
chrC06_random	GazeA2	CDS	1337790	1337929	13.2067	+	1	Parent=BnaC06g41980D
chrC06_random	GazeA2	CDS	1338014	1338220	3.7983	+	0	Parent=BnaC06g41980D
chrC06_random	GazeA2	mRNA	1716864	1718530	212.203	-	.	ID=BnaC06g42330D;Name=BnaC06g42330D
chrC06_random	GazeA2	UTR	1716864	1716940	0.3268	-	.	Parent=BnaC06g42330D
chrC06_random	GazeA2	CDS	1716941	1717089	15.0558	-	1	Parent=BnaC06g42330D
chrC06_random	GazeA2	CDS	1717490	1717618	17.1	-	1	Parent=BnaC06g42330D
chrC06_random	GazeA2	CDS	1717720	1717772	16.8444	-	2	Parent=BnaC06g42330D
chrC06_random	GazeA2	CDS	1717867	1717981	16.8873	-	1	Parent=BnaC06g42330D
chrC06_random	GazeA2	CDS	1718114	1718193	16.9118	-	2	Parent=BnaC06g42330D
chrC06_random	GazeA2	CDS	1718282	1718325	26.0011	-	0	Parent=BnaC06g42330D
chrC06_random	GazeA2	UTR	1718326	1718530	3.2959	-	.	Parent=BnaC06g42330D
chrC07	GazeA2	mRNA	7127445	7129929	173.784	-	.	ID=BnaC07g04570D;Name=BnaC07g04570D
chrC07	GazeA2	UTR	7127445	7127601	0.3436	-	.	Parent=BnaC07g04570D
chrC07	GazeA2	CDS	7127602	7127874	26.7953	-	0	Parent=BnaC07g04570D
chrC07	GazeA2	CDS	7127982	7128293	18.8584	-	0	Parent=BnaC07g04570D
chrC07	GazeA2	CDS	7128391	7128530	10.9293	-	1	Parent=BnaC07g04570D
chrC07	GazeA2	CDS	7128604	7128667	10.9463	-	0	Parent=BnaC07g04570D
chrC07	GazeA2	CDS	7128758	7129192	19.227	-	0	Parent=BnaC07g04570D
chrC07	GazeA2	CDS	7129858	7129929	22.9917	-	0	Parent=BnaC07g04570D
chrC07	GazeA2	mRNA	9383232	9384447	187.771	+	.	ID=BnaC07g05830D;Name=BnaC07g05830D
chrC07	GazeA2	UTR	9383232	9383268	1.294	+	.	Parent=BnaC07g05830D
chrC07	GazeA2	CDS	9383269	9383338	31.3424	+	0	Parent=BnaC07g05830D
chrC07	GazeA2	CDS	9383560	9383687	26.7832	+	1	Parent=BnaC07g05830D
chrC07	GazeA2	CDS	9383774	9383878	20.8429	+	0	Parent=BnaC07g05830D
chrC07	GazeA2	CDS	9383987	9384130	23.5994	+	0	Parent=BnaC07g05830D
chrC07	GazeA2	UTR	9384131	9384447	3.0113	+	.	Parent=BnaC07g05830D
chrC07	GazeA2	mRNA	9545998	9556173	1070.4	-	.	ID=BnaC07g05960D;Name=BnaC07g05960D
chrC07	GazeA2	UTR	9545998	9546291	1.538	-	.	Parent=BnaC07g05960D
chrC07	GazeA2	CDS	9546292	9546546	32.4237	-	0	Parent=BnaC07g05960D
chrC07	GazeA2	CDS	9546624	9546935	21.267	-	0	Parent=BnaC07g05960D
chrC07	GazeA2	CDS	9547024	9547163	21.0018	-	1	Parent=BnaC07g05960D
chrC07	GazeA2	CDS	9547255	9547324	23.2233	-	0	Parent=BnaC07g05960D
chrC07	GazeA2	CDS	9547427	9547578	11	-	1	Parent=BnaC07g05960D
chrC07	GazeA2	CDS	9547681	9547864	11	-	0	Parent=BnaC07g05960D
chrC07	GazeA2	CDS	9548003	9548140	21.6	-	0	Parent=BnaC07g05960D
chrC07	GazeA2	CDS	9548473	9550257	28.6545	-	0	Parent=BnaC07g05960D
chrC07	GazeA2	CDS	9550312	9550413	11	-	0	Parent=BnaC07g05960D
chrC07	GazeA2	CDS	9551637	9551650	10	-	1	Parent=BnaC07g05960D
chrC07	GazeA2	CDS	9551735	9551768	11.081	-	0	Parent=BnaC07g05960D
chrC07	GazeA2	CDS	9551851	9551965	35.2766	-	2	Parent=BnaC07g05960D
chrC07	GazeA2	CDS	9552049	9552137	21.6	-	0	Parent=BnaC07g05960D
chrC07	GazeA2	CDS	9552223	9552421	27.6	-	2	Parent=BnaC07g05960D
chrC07	GazeA2	CDS	9552509	9552573	21.6	-	0	Parent=BnaC07g05960D
chrC07	GazeA2	CDS	9552848	9552937	27.6	-	0	Parent=BnaC07g05960D
chrC07	GazeA2	CDS	9553257	9553331	27.344	-	0	Parent=BnaC07g05960D
chrC07	GazeA2	CDS	9553415	9553498	27.6	-	0	Parent=BnaC07g05960D
chrC07	GazeA2	CDS	9553736	9553967	21.6	-	2	Parent=BnaC07g05960D
chrC07	GazeA2	CDS	9554149	9554204	28.4116	-	0	Parent=BnaC07g05960D
chrC07	GazeA2	CDS	9554313	9554369	21.6	-	0	Parent=BnaC07g05960D
chrC07	GazeA2	CDS	9554456	9554537	35.5106	-	2	Parent=BnaC07g05960D
chrC07	GazeA2	CDS	9554568	9554583	-2	-	1	Parent=BnaC07g05960D
chrC07	GazeA2	CDS	9554838	9554907	14.4347	-	0	Parent=BnaC07g05960D
chrC07	GazeA2	CDS	9555082	9555119	8.4347	-	1	Parent=BnaC07g05960D
chrC07	GazeA2	CDS	9555266	9555746	20.2347	-	0	Parent=BnaC07g05960D
chrC07	GazeA2	UTR	9555747	9556173	7.4252	-	.	Parent=BnaC07g05960D
chrC07	GazeA2	mRNA	18640898	18642272	178.14	+	.	ID=BnaC07g13160D;Name=BnaC07g13160D
chrC07	GazeA2	UTR	18640898	18641026	4.9953	+	.	Parent=BnaC07g13160D
chrC07	GazeA2	CDS	18641027	18641051	20.5183	+	0	Parent=BnaC07g13160D
chrC07	GazeA2	CDS	18641244	18641383	18.4735	+	1	Parent=BnaC07g13160D
chrC07	GazeA2	CDS	18641635	18641760	16.9091	+	0	Parent=BnaC07g13160D
chrC07	GazeA2	CDS	18641839	18641965	16.9161	+	0	Parent=BnaC07g13160D
chrC07	GazeA2	CDS	18642075	18642130	19.9075	+	1	Parent=BnaC07g13160D
chrC07	GazeA2	UTR	18642131	18642272	0.5875	+	.	Parent=BnaC07g13160D
chrC07	GazeA2	mRNA	28433315	28434558	218.278	+	.	ID=BnaC07g21870D;Name=BnaC07g21870D
chrC07	GazeA2	UTR	28434378	28434558	3.3521	+	.	Parent=BnaC07g21870D
chrC07	GazeA2	CDS	28434249	28434377	30.7698	+	0	Parent=BnaC07g21870D
chrC07	GazeA2	CDS	28433959	28434047	27.5	+	1	Parent=BnaC07g21870D
chrC07	GazeA2	CDS	28433797	28433853	2.209	+	1	Parent=BnaC07g21870D
chrC07	GazeA2	CDS	28433685	28433710	21.6	+	2	Parent=BnaC07g21870D
chrC07	GazeA2	CDS	28433471	28433595	36.5475	+	0	Parent=BnaC07g21870D
chrC07	GazeA2	UTR	28433315	28433470	4.407	+	.	Parent=BnaC07g21870D
chrC07	GazeA2	mRNA	34002376	34003728	247.936	-	.	ID=BnaC07g29090D;Name=BnaC07g29090D
chrC07	GazeA2	UTR	34003680	34003728	5.892	-	.	Parent=BnaC07g29090D
chrC07	GazeA2	UTR	34003375	34003427	10.0828	-	.	Parent=BnaC07g29090D
chrC07	GazeA2	CDS	34003369	34003374	0.2809	-	0	Parent=BnaC07g29090D
chrC07	GazeA2	CDS	34003145	34003264	33.336	-	0	Parent=BnaC07g29090D
chrC07	GazeA2	CDS	34002923	34003051	21.6	-	0	Parent=BnaC07g29090D
chrC07	GazeA2	CDS	34002717	34002846	33.4705	-	0	Parent=BnaC07g29090D
chrC07	GazeA2	CDS	34002528	34002616	30.7041	-	1	Parent=BnaC07g29090D
chrC07	GazeA2	UTR	34002376	34002527	9.6135	-	.	Parent=BnaC07g29090D
chrC07	GazeA2	mRNA	43945051	43945517	27.008	-	.	ID=BnaC07g46220D;Name=BnaC07g46220D
chrC07	GazeA2	CDS	43945051	43945305	1.9641	-	0	Parent=BnaC07g46220D
chrC07	GazeA2	CDS	43945410	43945517	14.0641	-	0	Parent=BnaC07g46220D
chrC07_random	GazeA2	mRNA	2886894	2887855	166.208	+	.	ID=BnaC07g51150D;Name=BnaC07g51150D
chrC07_random	GazeA2	CDS	2886894	2886923	22.4849	+	0	Parent=BnaC07g51150D
chrC07_random	GazeA2	CDS	2887017	2887120	22.3036	+	0	Parent=BnaC07g51150D
chrC07_random	GazeA2	CDS	2887197	2887363	15.3801	+	2	Parent=BnaC07g51150D
chrC07_random	GazeA2	CDS	2887454	2887542	15.4267	+	1	Parent=BnaC07g51150D
chrC07_random	GazeA2	CDS	2887639	2887734	25.0908	+	0	Parent=BnaC07g51150D
chrC07_random	GazeA2	UTR	2887735	2887855	0.5781	+	.	Parent=BnaC07g51150D
chrC08	GazeA2	mRNA	8715648	8717439	244.36	-	.	ID=BnaC08g06250D;Name=BnaC08g06250D
chrC08	GazeA2	UTR	8715648	8715818	6.1687	-	.	Parent=BnaC08g06250D
chrC08	GazeA2	CDS	8715819	8715874	23.863	-	1	Parent=BnaC08g06250D
chrC08	GazeA2	CDS	8715972	8716098	27.9647	-	0	Parent=BnaC08g06250D
chrC08	GazeA2	CDS	8716167	8716292	27.9627	-	0	Parent=BnaC08g06250D
chrC08	GazeA2	CDS	8716920	8717059	23.0399	-	1	Parent=BnaC08g06250D
chrC08	GazeA2	CDS	8717210	8717237	19.4492	-	0	Parent=BnaC08g06250D
chrC08	GazeA2	UTR	8717238	8717439	8.2054	-	.	Parent=BnaC08g06250D
chrC08	GazeA2	mRNA	17846406	17847850	218.639	-	.	ID=BnaC08g12720D;Name=BnaC08g12720D
chrC08	GazeA2	UTR	17846406	17846611	3.2606	-	.	Parent=BnaC08g12720D
chrC08	GazeA2	CDS	17846612	17846755	29.0134	-	0	Parent=BnaC08g12720D
chrC08	GazeA2	CDS	17846884	17846988	27.4125	-	0	Parent=BnaC08g12720D
chrC08	GazeA2	CDS	17847107	17847234	24.1252	-	1	Parent=BnaC08g12720D
chrC08	GazeA2	CDS	17847595	17847664	38.4038	-	0	Parent=BnaC08g12720D
chrC08	GazeA2	UTR	17847665	17847673	-0.4213	-	.	Parent=BnaC08g12720D
chrC08	GazeA2	UTR	17847751	17847850	5.9333	-	.	Parent=BnaC08g12720D
chrC08	GazeA2	mRNA	20263376	20264150	62.9148	-	.	ID=BnaC08g16110D;Name=BnaC08g16110D
chrC08	GazeA2	CDS	20264029	20264150	13.5269	-	0	Parent=BnaC08g16110D
chrC08	GazeA2	CDS	20263923	20263948	1.5816	-	2	Parent=BnaC08g16110D
chrC08	GazeA2	CDS	20263616	20263668	1.4662	-	1	Parent=BnaC08g16110D
chrC08	GazeA2	CDS	20263376	20263498	13.4569	-	0	Parent=BnaC08g16110D
chrC08	GazeA2	mRNA	20803429	20805255	322.099	-	.	ID=BnaC08g17090D;Name=BnaC08g17090D
chrC08	GazeA2	UTR	20805111	20805255	3.743	-	.	Parent=BnaC08g17090D
chrC08	GazeA2	CDS	20805075	20805110	29.1	-	0	Parent=BnaC08g17090D
chrC08	GazeA2	CDS	20804943	20804970	17.1	-	0	Parent=BnaC08g17090D
chrC08	GazeA2	CDS	20804754	20804840	19.4909	-	1	Parent=BnaC08g17090D
chrC08	GazeA2	CDS	20804503	20804561	17.0558	-	1	Parent=BnaC08g17090D
chrC08	GazeA2	CDS	20804121	20804162	23.0677	-	0	Parent=BnaC08g17090D
chrC08	GazeA2	CDS	20803943	20804016	22.7773	-	0	Parent=BnaC08g17090D
chrC08	GazeA2	CDS	20803726	20803823	17.1237	-	2	Parent=BnaC08g17090D
chrC08	GazeA2	CDS	20803590	20803627	28.2468	-	1	Parent=BnaC08g17090D
chrC08	GazeA2	UTR	20803429	20803589	4.6693	-	.	Parent=BnaC08g17090D
chrC08	GazeA2	mRNA	20895428	20898635	365.932	-	.	ID=BnaC08g17300D;Name=BnaC08g17300D
chrC08	GazeA2	UTR	20897693	20898635	8.421	-	.	Parent=BnaC08g17300D
chrC08	GazeA2	CDS	20897636	20897692	23.6224	-	0	Parent=BnaC08g17300D
chrC08	GazeA2	CDS	20897405	20897459	29.1	-	0	Parent=BnaC08g17300D
chrC08	GazeA2	CDS	20896978	20897016	17.1	-	1	Parent=BnaC08g17300D
chrC08	GazeA2	CDS	20896825	20896888	17.1	-	1	Parent=BnaC08g17300D
chrC08	GazeA2	CDS	20896655	20896716	17	-	2	Parent=BnaC08g17300D
chrC08	GazeA2	CDS	20896530	20896569	17.1	-	1	Parent=BnaC08g17300D
chrC08	GazeA2	CDS	20896384	20896411	17	-	2	Parent=BnaC08g17300D
chrC08	GazeA2	CDS	20896092	20896183	29.0189	-	0	Parent=BnaC08g17300D
chrC08	GazeA2	CDS	20895737	20896010	29.0789	-	2	Parent=BnaC08g17300D
chrC08	GazeA2	UTR	20895428	20895736	1.7192	-	.	Parent=BnaC08g17300D
chrC08	GazeA2	mRNA	25974748	25977682	205.772	-	.	ID=BnaC08g23790D;Name=BnaC08g23790D
chrC08	GazeA2	UTR	25976080	25977682	8.2724	-	.	Parent=BnaC08g23790D
chrC08	GazeA2	CDS	25976046	25976079	28.5837	-	0	Parent=BnaC08g23790D
chrC08	GazeA2	CDS	25975417	25975556	27.8333	-	1	Parent=BnaC08g23790D
chrC08	GazeA2	CDS	25975189	25975314	21.564	-	0	Parent=BnaC08g23790D
chrC08	GazeA2	CDS	25974967	25975107	30.9233	-	0	Parent=BnaC08g23790D
chrC08	GazeA2	UTR	25974748	25974966	7.8015	-	.	Parent=BnaC08g23790D
chrC08	GazeA2	mRNA	27679741	27681378	216.02	+	.	ID=BnaC08g26190D;Name=BnaC08g26190D
chrC08	GazeA2	UTR	27681115	27681378	2.0478	+	.	Parent=BnaC08g26190D
chrC08	GazeA2	CDS	27680959	27681114	26.7183	+	0	Parent=BnaC08g26190D
chrC08	GazeA2	CDS	27680564	27680664	28.7238	+	1	Parent=BnaC08g26190D
chrC08	GazeA2	CDS	27680388	27680485	17.1	+	2	Parent=BnaC08g26190D
chrC08	GazeA2	CDS	27679970	27680072	32.9657	+	1	Parent=BnaC08g26190D
chrC08	GazeA2	CDS	27679795	27679840	27.1048	+	0	Parent=BnaC08g26190D
chrC08	GazeA2	UTR	27679741	27679794	1.6017	+	.	Parent=BnaC08g26190D
chrC08	GazeA2	mRNA	29347440	29349467	284.074	-	.	ID=BnaC08g28860D;Name=BnaC08g28860D
chrC08	GazeA2	UTR	29349254	29349467	9.3383	-	.	Parent=BnaC08g28860D
chrC08	GazeA2	CDS	29349185	29349253	30.3326	-	0	Parent=BnaC08g28860D
chrC08	GazeA2	CDS	29349005	29349088	27.6	-	0	Parent=BnaC08g28860D
chrC08	GazeA2	CDS	29348050	29348202	31.5585	-	0	Parent=BnaC08g28860D
chrC08	GazeA2	CDS	29347847	29347960	33.408	-	0	Parent=BnaC08g28860D
chrC08	GazeA2	CDS	29347692	29347754	33.2085	-	0	Parent=BnaC08g28860D
chrC08	GazeA2	UTR	29347440	29347691	10.977	-	.	Parent=BnaC08g28860D
chrC08	GazeA2	mRNA	34442846	34445368	375.618	+	.	ID=BnaC08g37880D;Name=BnaC08g37880D
chrC08	GazeA2	UTR	34445154	34445368	0.7282	+	.	Parent=BnaC08g37880D
chrC08	GazeA2	CDS	34444874	34445153	29.0145	+	2	Parent=BnaC08g37880D
chrC08	GazeA2	CDS	34444680	34444771	17.0701	+	0	Parent=BnaC08g37880D
chrC08	GazeA2	CDS	34444454	34444481	17.0776	+	2	Parent=BnaC08g37880D
chrC08	GazeA2	CDS	34444288	34444327	23.0688	+	1	Parent=BnaC08g37880D
chrC08	GazeA2	CDS	34444139	34444200	23	+	2	Parent=BnaC08g37880D
chrC08	GazeA2	CDS	34443978	34444041	17.1	+	1	Parent=BnaC08g37880D
chrC08	GazeA2	CDS	34443859	34443897	16.1734	+	1	Parent=BnaC08g37880D
chrC08	GazeA2	CDS	34443423	34443477	35.1	+	0	Parent=BnaC08g37880D
chrC08	GazeA2	CDS	34443168	34443224	29.6957	+	0	Parent=BnaC08g37880D
chrC08	GazeA2	UTR	34443116	34443167	0.9056	+	.	Parent=BnaC08g37880D
chrC08	GazeA2	UTR	34442846	34442907	2.984	+	.	Parent=BnaC08g37880D
chrC08	GazeA2	mRNA	34582915	34584888	405.244	+	.	ID=BnaC08g38130D;Name=BnaC08g38130D
chrC08	GazeA2	UTR	34584433	34584888	8.9418	+	.	Parent=BnaC08g38130D
chrC08	GazeA2	CDS	34584395	34584432	27.1169	+	1	Parent=BnaC08g38130D
chrC08	GazeA2	CDS	34584211	34584308	27.1292	+	2	Parent=BnaC08g38130D
chrC08	GazeA2	CDS	34584022	34584095	27.4164	+	0	Parent=BnaC08g38130D
chrC08	GazeA2	CDS	34583885	34583926	21.5894	+	0	Parent=BnaC08g38130D
chrC08	GazeA2	CDS	34583499	34583557	21.5304	+	1	Parent=BnaC08g38130D
chrC08	GazeA2	CDS	34583278	34583364	23.9746	+	1	Parent=BnaC08g38130D
chrC08	GazeA2	CDS	34583154	34583181	21.5944	+	0	Parent=BnaC08g38130D
chrC08	GazeA2	CDS	34583038	34583073	33.4582	+	0	Parent=BnaC08g38130D
chrC08	GazeA2	UTR	34582915	34583037	3.7165	+	.	Parent=BnaC08g38130D
chrC08	GazeA2	mRNA	35264196	35265620	210.605	+	.	ID=BnaC08g39660D;Name=BnaC08g39660D
chrC08	GazeA2	UTR	35265403	35265620	1.9837	+	.	Parent=BnaC08g39660D
chrC08	GazeA2	CDS	35265274	35265402	28.94	+	0	Parent=BnaC08g39660D
chrC08	GazeA2	CDS	35265122	35265210	23.0682	+	1	Parent=BnaC08g39660D
chrC08	GazeA2	CDS	35264959	35265048	17.0678	+	1	Parent=BnaC08g39660D
chrC08	GazeA2	CDS	35264851	35264876	17.0907	+	2	Parent=BnaC08g39660D
chrC08	GazeA2	CDS	35264636	35264760	33.7734	+	0	Parent=BnaC08g39660D
chrC08	GazeA2	UTR	35264196	35264635	8.7187	+	.	Parent=BnaC08g39660D
chrC09	GazeA2	mRNA	8327183	8328645	187.412	+	.	ID=BnaC09g11960D;Name=BnaC09g11960D
chrC09	GazeA2	UTR	8327183	8327302	1.0743	+	.	Parent=BnaC09g11960D
chrC09	GazeA2	CDS	8327303	8327372	29.1	+	0	Parent=BnaC09g11960D
chrC09	GazeA2	CDS	8327824	8327951	25.6954	+	1	Parent=BnaC09g11960D
chrC09	GazeA2	CDS	8328032	8328136	21.4108	+	0	Parent=BnaC09g11960D
chrC09	GazeA2	CDS	8328213	8328356	29.3926	+	0	Parent=BnaC09g11960D
chrC09	GazeA2	UTR	8328357	8328645	6.9191	+	.	Parent=BnaC09g11960D
chrC09	GazeA2	mRNA	8737324	8738457	153.667	-	.	ID=BnaC09g12280D;Name=BnaC09g12280D
chrC09	GazeA2	CDS	8738367	8738457	28.5152	-	0	Parent=BnaC09g12280D
chrC09	GazeA2	CDS	8737890	8738017	21.0936	-	1	Parent=BnaC09g12280D
chrC09	GazeA2	CDS	8737704	8737820	17.1	-	0	Parent=BnaC09g12280D
chrC09	GazeA2	CDS	8737471	8737614	26.153	-	0	Parent=BnaC09g12280D
chrC09	GazeA2	UTR	8737324	8737470	0.945	-	.	Parent=BnaC09g12280D
chrC09	GazeA2	mRNA	14092036	14094176	193.264	-	.	ID=BnaC09g17320D;Name=BnaC09g17320D
chrC09	GazeA2	UTR	14092036	14092613	8.3586	-	.	Parent=BnaC09g17320D
chrC09	GazeA2	CDS	14092614	14092709	27.6465	-	0	Parent=BnaC09g17320D
chrC09	GazeA2	CDS	14092791	14092879	18.2523	-	1	Parent=BnaC09g17320D
chrC09	GazeA2	CDS	14093213	14093279	6.2402	-	0	Parent=BnaC09g17320D
chrC09	GazeA2	CDS	14093555	14093618	8.7301	-	2	Parent=BnaC09g17320D
chrC09	GazeA2	CDS	14093712	14093815	24.5459	-	0	Parent=BnaC09g17320D
chrC09	GazeA2	CDS	14093919	14094176	8.7386	-	0	Parent=BnaC09g17320D
chrC09	GazeA2	mRNA	32250456	32252129	231.543	-	.	ID=BnaC09g29580D;Name=BnaC09g29580D
chrC09	GazeA2	UTR	32250456	32250714	2.3125	-	.	Parent=BnaC09g29580D
chrC09	GazeA2	CDS	32250715	32250858	30.5901	-	0	Parent=BnaC09g29580D
chrC09	GazeA2	CDS	32251212	32251316	27.408	-	0	Parent=BnaC09g29580D
chrC09	GazeA2	CDS	32251411	32251538	36.1252	-	1	Parent=BnaC09g29580D
chrC09	GazeA2	CDS	32251791	32251860	37.8036	-	0	Parent=BnaC09g29580D
chrC09	GazeA2	UTR	32251861	32251883	0.5746	-	.	Parent=BnaC09g29580D
chrC09	GazeA2	UTR	32251976	32252129	5.8613	-	.	Parent=BnaC09g29580D
chrC09	GazeA2	mRNA	37978414	37980817	219.973	-	.	ID=BnaC09g34500D;Name=BnaC09g34500D
chrC09	GazeA2	CDS	37980792	37980817	14.9948	-	0	Parent=BnaC09g34500D
chrC09	GazeA2	CDS	37980618	37980673	3.0857	-	2	Parent=BnaC09g34500D
chrC09	GazeA2	CDS	37979330	37979432	15.7938	-	1	Parent=BnaC09g34500D
chrC09	GazeA2	CDS	37979144	37979241	16.2356	-	2	Parent=BnaC09g34500D
chrC09	GazeA2	CDS	37978968	37979068	16.2356	-	1	Parent=BnaC09g34500D
chrC09	GazeA2	CDS	37978810	37978887	16.2356	-	0	Parent=BnaC09g34500D
chrC09	GazeA2	CDS	37978628	37978705	27.2604	-	0	Parent=BnaC09g34500D
chrC09	GazeA2	UTR	37978414	37978627	8.6677	-	.	Parent=BnaC09g34500D
chrC09_random	GazeA2	mRNA	216935	218422	296.818	+	.	ID=BnaC09g51120D;Name=BnaC09g51120D
chrC09_random	GazeA2	CDS	216935	217027	-1	+	0	Parent=BnaC09g51120D
chrC09_random	GazeA2	CDS	217082	217188	10.1849	+	0	Parent=BnaC09g51120D
chrC09_random	GazeA2	CDS	217359	217492	32.6849	+	2	Parent=BnaC09g51120D
chrC09_random	GazeA2	CDS	217623	217731	33.1326	+	1	Parent=BnaC09g51120D
chrC09_random	GazeA2	CDS	217797	217875	33.4103	+	2	Parent=BnaC09g51120D
chrC09_random	GazeA2	CDS	217949	218065	27.4135	+	0	Parent=BnaC09g51120D
chrC09_random	GazeA2	CDS	218152	218289	31.2749	+	0	Parent=BnaC09g51120D
chrC09_random	GazeA2	UTR	218290	218422	5.8193	+	.	Parent=BnaC09g51120D
chrCnn_random	GazeA2	mRNA	20051752	20053245	205.41	+	.	ID=BnaCnng21490D;Name=BnaCnng21490D
chrCnn_random	GazeA2	UTR	20051752	20051819	5.805	+	.	Parent=BnaCnng21490D
chrCnn_random	GazeA2	UTR	20052030	20052049	0.5189	+	.	Parent=BnaCnng21490D
chrCnn_random	GazeA2	CDS	20052050	20052119	31.0742	+	0	Parent=BnaCnng21490D
chrCnn_random	GazeA2	CDS	20052250	20052377	21.4061	+	1	Parent=BnaCnng21490D
chrCnn_random	GazeA2	CDS	20052442	20052546	21.4125	+	0	Parent=BnaCnng21490D
chrCnn_random	GazeA2	CDS	20052863	20053006	30.7141	+	0	Parent=BnaCnng21490D
chrCnn_random	GazeA2	UTR	20053007	20053245	3.5825	+	.	Parent=BnaCnng21490D
chrCnn_random	GazeA2	mRNA	32240614	32242431	317.686	-	.	ID=BnaCnng33990D;Name=BnaCnng33990D
chrCnn_random	GazeA2	UTR	32240614	32240848	4.1842	-	.	Parent=BnaCnng33990D
chrCnn_random	GazeA2	CDS	32240849	32240988	30.9639	-	1	Parent=BnaCnng33990D
chrCnn_random	GazeA2	CDS	32241384	32241512	36.6563	-	1	Parent=BnaCnng33990D
chrCnn_random	GazeA2	CDS	32241605	32241657	27.5145	-	2	Parent=BnaCnng33990D
chrCnn_random	GazeA2	CDS	32241752	32241866	21.3904	-	1	Parent=BnaCnng33990D
chrCnn_random	GazeA2	CDS	32242062	32242141	27.2947	-	2	Parent=BnaCnng33990D
chrCnn_random	GazeA2	CDS	32242252	32242295	28.8766	-	0	Parent=BnaCnng33990D
chrCnn_random	GazeA2	UTR	32242296	32242431	6.0542	-	.	Parent=BnaCnng33990D
chrCnn_random	GazeA2	mRNA	38659939	38661187	253.102	+	.	ID=BnaCnng40140D;Name=BnaCnng40140D
chrCnn_random	GazeA2	UTR	38659939	38660024	2.2487	+	.	Parent=BnaCnng40140D
chrCnn_random	GazeA2	CDS	38660025	38660070	30.534	+	0	Parent=BnaCnng40140D
chrCnn_random	GazeA2	CDS	38660144	38660246	28.3305	+	1	Parent=BnaCnng40140D
chrCnn_random	GazeA2	CDS	38660437	38660534	27.4078	+	2	Parent=BnaCnng40140D
chrCnn_random	GazeA2	CDS	38660608	38660708	21.6	+	1	Parent=BnaCnng40140D
chrCnn_random	GazeA2	CDS	38660796	38660951	29.7779	+	0	Parent=BnaCnng40140D
chrCnn_random	GazeA2	UTR	38660952	38661187	5.2864	+	.	Parent=BnaCnng40140D
chrCnn_random	GazeA2	mRNA	45696704	45697645	37.9614	-	.	ID=BnaCnng46390D;Name=BnaCnng46390D
chrCnn_random	GazeA2	CDS	45696704	45696808	1.9509	-	0	Parent=BnaCnng46390D
chrCnn_random	GazeA2	CDS	45696897	45697001	2.0442	-	0	Parent=BnaCnng46390D
chrCnn_random	GazeA2	CDS	45697111	45697234	4.5351	-	2	Parent=BnaCnng46390D
chrCnn_random	GazeA2	CDS	45697321	45697341	-1.0047	-	2	Parent=BnaCnng46390D
chrCnn_random	GazeA2	CDS	45697560	45697645	16.551	-	0	Parent=BnaCnng46390D
chrCnn_random	GazeA2	mRNA	47685244	47686598	167.203	-	.	ID=BnaCnng48400D;Name=BnaCnng48400D
chrCnn_random	GazeA2	UTR	47685244	47685297	0.6598	-	.	Parent=BnaCnng48400D
chrCnn_random	GazeA2	CDS	47685298	47685386	27.4415	-	1	Parent=BnaCnng48400D
chrCnn_random	GazeA2	CDS	47685623	47685752	17.1	-	0	Parent=BnaCnng48400D
chrCnn_random	GazeA2	CDS	47685814	47685942	23.1	-	0	Parent=BnaCnng48400D
chrCnn_random	GazeA2	CDS	47686028	47686133	8.8902	-	2	Parent=BnaCnng48400D
chrCnn_random	GazeA2	CDS	47686249	47686349	15.2562	-	0	Parent=BnaCnng48400D
chrCnn_random	GazeA2	UTR	47686350	47686598	3.8692	-	.	Parent=BnaCnng48400D
chrCnn_random	GazeA2	mRNA	50671106	50672437	172.968	+	.	ID=BnaCnng51160D;Name=BnaCnng51160D
chrCnn_random	GazeA2	CDS	50671106	50671157	-1.0074	+	0	Parent=BnaCnng51160D
chrCnn_random	GazeA2	CDS	50671220	50671318	10.2895	+	1	Parent=BnaCnng51160D
chrCnn_random	GazeA2	CDS	50671407	50671484	17.1	+	1	Parent=BnaCnng51160D
chrCnn_random	GazeA2	CDS	50671546	50671658	23.0516	+	1	Parent=BnaCnng51160D
chrCnn_random	GazeA2	CDS	50671761	50671864	17.1	+	0	Parent=BnaCnng51160D
chrCnn_random	GazeA2	CDS	50671955	50672258	29.1	+	2	Parent=BnaCnng51160D
chrCnn_random	GazeA2	UTR	50672259	50672437	1.3876	+	.	Parent=BnaCnng51160D
chrCnn_random	GazeA2	mRNA	50748250	50749981	275.017	-	.	ID=BnaCnng51240D;Name=BnaCnng51240D
chrCnn_random	GazeA2	UTR	50748250	50748485	4.6148	-	.	Parent=BnaCnng51240D
chrCnn_random	GazeA2	CDS	50748486	50748614	30.5149	-	0	Parent=BnaCnng51240D
chrCnn_random	GazeA2	CDS	50748690	50748778	27.4165	-	1	Parent=BnaCnng51240D
chrCnn_random	GazeA2	CDS	50748873	50748962	27.418	-	1	Parent=BnaCnng51240D
chrCnn_random	GazeA2	CDS	50749063	50749088	21.6	-	2	Parent=BnaCnng51240D
chrCnn_random	GazeA2	CDS	50749172	50749296	38.6995	-	0	Parent=BnaCnng51240D
chrCnn_random	GazeA2	UTR	50749297	50749306	1.1821	-	.	Parent=BnaCnng51240D
chrCnn_random	GazeA2	UTR	50749671	50749981	5.652	-	.	Parent=BnaCnng51240D
chrCnn_random	GazeA2	mRNA	54496747	54497888	176.361	-	.	ID=BnaCnng54670D;Name=BnaCnng54670D
chrCnn_random	GazeA2	UTR	54496747	54496855	0.0163	-	.	Parent=BnaCnng54670D
chrCnn_random	GazeA2	CDS	54496856	54497159	29.1	-	2	Parent=BnaCnng54670D
chrCnn_random	GazeA2	CDS	54497250	54497353	17.1	-	0	Parent=BnaCnng54670D
chrCnn_random	GazeA2	CDS	54497456	54497568	22.9422	-	1	Parent=BnaCnng54670D
chrCnn_random	GazeA2	CDS	54497630	54497707	17.1322	-	1	Parent=BnaCnng54670D
chrCnn_random	GazeA2	CDS	54497792	54497888	10.1192	-	0	Parent=BnaCnng54670D
chrCnn_random	GazeA2	mRNA	58868629	58869556	20.3062	-	.	ID=BnaCnng59170D;Name=BnaCnng59170D
chrCnn_random	GazeA2	CDS	58868629	58868736	1.2684	-	0	Parent=BnaCnng59170D
chrCnn_random	GazeA2	CDS	58869033	58869156	1.2555	-	2	Parent=BnaCnng59170D
chrCnn_random	GazeA2	CDS	58869486	58869556	10.9912	-	0	Parent=BnaCnng59170D
chrA03	GazeA2	mRNA	18556804	18558977	188.668	-	.	ID=BnaA03g37430D;Name=BnaA03g37430D
chrA03	GazeA2	CDS	18556804	18557526	20.747	-	0	Parent=BnaA03g37430D
chrA03	GazeA2	CDS	18557594	18557737	13.8561	-	0	Parent=BnaA03g37430D
chrA03	GazeA2	CDS	18557829	18557927	17.1	-	0	Parent=BnaA03g37430D
chrA03	GazeA2	CDS	18558277	18558382	10.9	-	2	Parent=BnaA03g37430D
chrA03	GazeA2	CDS	18558487	18558559	17	-	1	Parent=BnaA03g37430D
chrA03	GazeA2	CDS	18558654	18558801	33.3286	-	0	Parent=BnaA03g37430D
chrA03	GazeA2	UTR	18558802	18558977	2.9122	-	.	Parent=BnaA03g37430D
chrA04_random	GazeA2	mRNA	17176	18733	218.118	-	.	ID=BnaA04g27280D;Name=BnaA04g27280D
chrA04_random	GazeA2	UTR	17176	17343	4.7057	-	.	Parent=BnaA04g27280D
chrA04_random	GazeA2	CDS	17344	17406	24.8678	-	0	Parent=BnaA04g27280D
chrA04_random	GazeA2	CDS	17568	17681	17.1582	-	0	Parent=BnaA04g27280D
chrA04_random	GazeA2	CDS	17770	17922	17.1593	-	0	Parent=BnaA04g27280D
chrA04_random	GazeA2	CDS	18402	18485	17.3276	-	0	Parent=BnaA04g27280D
chrA04_random	GazeA2	CDS	18585	18653	27.2036	-	0	Parent=BnaA04g27280D
chrA04_random	GazeA2	UTR	18654	18733	1.9421	-	.	Parent=BnaA04g27280D
chrA06	GazeA2	mRNA	4986689	4988401	261.966	-	.	ID=BnaA06g09230D;Name=BnaA06g09230D
chrA06	GazeA2	UTR	4986689	4986991	5.1017	-	.	Parent=BnaA06g09230D
chrA06	GazeA2	CDS	4986992	4987120	28.9957	-	0	Parent=BnaA06g09230D
chrA06	GazeA2	CDS	4987221	4987309	21.3146	-	1	Parent=BnaA06g09230D
chrA06	GazeA2	CDS	4987416	4987505	21.3782	-	1	Parent=BnaA06g09230D
chrA06	GazeA2	CDS	4987579	4987604	21.6	-	2	Parent=BnaA06g09230D
chrA06	GazeA2	CDS	4987699	4987823	38.3337	-	0	Parent=BnaA06g09230D
chrA06	GazeA2	UTR	4987824	4988401	17.3054	-	.	Parent=BnaA06g09230D
chrA07	GazeA2	mRNA	20470337	20471775	272.034	-	.	ID=BnaA07g28330D;Name=BnaA07g28330D
chrA07	GazeA2	UTR	20470337	20470566	4.4656	-	.	Parent=BnaA07g28330D
chrA07	GazeA2	CDS	20470567	20470695	29.2704	-	0	Parent=BnaA07g28330D
chrA07	GazeA2	CDS	20470783	20470871	27.4086	-	1	Parent=BnaA07g28330D
chrA07	GazeA2	CDS	20470951	20471040	27.2982	-	1	Parent=BnaA07g28330D
chrA07	GazeA2	CDS	20471133	20471158	21.6	-	2	Parent=BnaA07g28330D
chrA07	GazeA2	CDS	20471256	20471380	38.8033	-	0	Parent=BnaA07g28330D
chrA07	GazeA2	UTR	20471381	20471387	-0.6303	-	.	Parent=BnaA07g28330D
chrA07	GazeA2	UTR	20471639	20471775	5.854	-	.	Parent=BnaA07g28330D
chrA08	GazeA2	mRNA	16940213	16941605	87.9795	+	.	ID=BnaA08g24020D;Name=BnaA08g24020D
chrA08	GazeA2	CDS	16940213	16940233	-1.1105	+	0	Parent=BnaA08g24020D
chrA08	GazeA2	CDS	16940307	16940354	4.0793	+	0	Parent=BnaA08g24020D
chrA08	GazeA2	CDS	16940746	16940909	7.478	+	0	Parent=BnaA08g24020D
chrA08	GazeA2	CDS	16941000	16941025	7.6719	+	2	Parent=BnaA08g24020D
chrA08	GazeA2	CDS	16941110	16941199	7.4878	+	1	Parent=BnaA08g24020D
chrA08	GazeA2	CDS	16941298	16941386	7.4884	+	1	Parent=BnaA08g24020D
chrA08	GazeA2	CDS	16941474	16941605	4.0862	+	0	Parent=BnaA08g24020D
chrC02	GazeA2	mRNA	7932837	7933721	56.0947	-	.	ID=BnaC02g12440D;Name=BnaC02g12440D
chrC02	GazeA2	CDS	7932837	7932949	17.4604	-	1	Parent=BnaC02g12440D
chrC02	GazeA2	CDS	7933256	7933469	2.3313	-	0	Parent=BnaC02g12440D
chrC02	GazeA2	CDS	7933581	7933721	14.4278	-	0	Parent=BnaC02g12440D
chrC04	GazeA2	mRNA	22293451	22295100	194.976	+	.	ID=BnaC04g21410D;Name=BnaC04g21410D
chrC04	GazeA2	UTR	22293451	22293529	1.5826	+	.	Parent=BnaC04g21410D
chrC04	GazeA2	CDS	22293530	22293598	27.7	+	0	Parent=BnaC04g21410D
chrC04	GazeA2	CDS	22293690	22293773	17.1	+	0	Parent=BnaC04g21410D
chrC04	GazeA2	CDS	22294348	22294500	20.9148	+	0	Parent=BnaC04g21410D
chrC04	GazeA2	CDS	22294592	22294705	16.988	+	0	Parent=BnaC04g21410D
chrC04	GazeA2	CDS	22294861	22294923	28.9	+	0	Parent=BnaC04g21410D
chrC04	GazeA2	UTR	22294924	22295100	2.0715	+	.	Parent=BnaC04g21410D
chrC05_random	GazeA2	mRNA	58113	59130	53.7285	+	.	ID=BnaC05g49100D;Name=BnaC05g49100D
chrC05_random	GazeA2	UTR	58113	58120	-1.0077	+	.	Parent=BnaC05g49100D
chrC05_random	GazeA2	CDS	58121	58240	14.3323	+	0	Parent=BnaC05g49100D
chrC05_random	GazeA2	CDS	58517	58607	2.2802	+	0	Parent=BnaC05g49100D
chrC05_random	GazeA2	CDS	58715	58803	2.3637	+	1	Parent=BnaC05g49100D
chrC05_random	GazeA2	CDS	58902	59039	2.354	+	0	Parent=BnaC05g49100D
chrC05_random	GazeA2	UTR	59040	59130	0.5349	+	.	Parent=BnaC05g49100D
chrC06	GazeA2	mRNA	31513657	31515100	219.787	-	.	ID=BnaC06g30850D;Name=BnaC06g30850D
chrC06	GazeA2	UTR	31514718	31515100	7.3366	-	.	Parent=BnaC06g30850D
chrC06	GazeA2	CDS	31514593	31514717	34.7342	-	0	Parent=BnaC06g30850D
chrC06	GazeA2	CDS	31514472	31514497	17.1	-	2	Parent=BnaC06g30850D
chrC06	GazeA2	CDS	31514290	31514379	29.022	-	1	Parent=BnaC06g30850D
chrC06	GazeA2	CDS	31514113	31514201	16.9805	-	1	Parent=BnaC06g30850D
chrC06	GazeA2	CDS	31513896	31514024	27.5188	-	0	Parent=BnaC06g30850D
chrC06	GazeA2	UTR	31513657	31513895	7.1545	-	.	Parent=BnaC06g30850D
