# Supplementary material for: Genome-wide characterization of ubiquitin-conjugating enzyme gene family explores its genetic effects on the oil content and yield of Brassica napus
Source: Front Plant Sci. 2023 Mar 20;14:1118339. doi: 10.3389/fpls.2023.1118339 (PMC10067767; doi:10.3389/fpls.2023.1118339)
Supplement: Supplementary file 10 [file Table_5.xlsx]

## Sheet: Sheet1
Table S5. Positions of cis-acting regulatory elements in BnUBC promoters.
GeneID	Chr	Start	End	Cis-acting regulatory element
BnaA01g01300D	chrA01	1343	1389	MYB-like sequence
BnaA01g01300D	chrA01	126	171	CGTCA-motif
BnaA01g01300D	chrA01	174	219	CGTCA-motif
BnaA01g01300D	chrA01	913	962	TCA-element
BnaA01g01300D	chrA01	838	884	LTR
BnaA01g01300D	chrA01	1270	1316	LTR
BnaA01g01300D	chrA01	104	148	CAAT-box
BnaA01g01300D	chrA01	235	280	CAAT-box
BnaA01g01300D	chrA01	344	388	CAAT-box
BnaA01g01300D	chrA01	445	489	CAAT-box
BnaA01g01300D	chrA01	464	509	CAAT-box
BnaA01g01300D	chrA01	465	509	CAAT-box
BnaA01g01300D	chrA01	535	579	CAAT-box
BnaA01g01300D	chrA01	547	591	CAAT-box
BnaA01g01300D	chrA01	567	612	CAAT-box
BnaA01g01300D	chrA01	585	630	CAAT-box
BnaA01g01300D	chrA01	602	646	CAAT-box
BnaA01g01300D	chrA01	646	691	CAAT-box
BnaA01g01300D	chrA01	684	728	CAAT-box
BnaA01g01300D	chrA01	697	742	CAAT-box
BnaA01g01300D	chrA01	704	749	CAAT-box
BnaA01g01300D	chrA01	705	749	CAAT-box
BnaA01g01300D	chrA01	751	795	CAAT-box
BnaA01g01300D	chrA01	846	890	CAAT-box
BnaA01g01300D	chrA01	865	909	CAAT-box
BnaA01g01300D	chrA01	935	980	CAAT-box
BnaA01g01300D	chrA01	1024	1068	CAAT-box
BnaA01g01300D	chrA01	1109	1153	CAAT-box
BnaA01g01300D	chrA01	1279	1323	CAAT-box
BnaA01g01300D	chrA01	1354	1398	CAAT-box
BnaA01g01300D	chrA01	1495	1539	CAAT-box
BnaA01g01300D	chrA01	1502	1547	CAAT-box
BnaA01g01300D	chrA01	1522	1566	CAAT-box
BnaA01g01300D	chrA01	1558	1602	CAAT-box
BnaA01g01300D	chrA01	1587	1632	CAAT-box
BnaA01g01300D	chrA01	1588	1632	CAAT-box
BnaA01g01300D	chrA01	1607	1651	CAAT-box
BnaA01g01300D	chrA01	1676	1721	CAAT-box
BnaA01g01300D	chrA01	1685	1729	CAAT-box
BnaA01g01300D	chrA01	1977	2021	CAAT-box
BnaA01g01300D	chrA01	59	105	MYB
BnaA01g01300D	chrA01	129	175	MYB
BnaA01g01300D	chrA01	311	357	MYB
BnaA01g01300D	chrA01	1343	1389	MYB
BnaA01g01300D	chrA01	405	451	Sp1
BnaA01g01300D	chrA01	126	171	as-1
BnaA01g01300D	chrA01	174	219	as-1
BnaA01g01300D	chrA01	423	470	P-box
BnaA01g01300D	chrA01	0	46	CAT-box
BnaA01g01300D	chrA01	-7	42	I-box
BnaA01g01300D	chrA01	987	1036	TCA
BnaA01g01300D	chrA01	59	105	Myb-binding site
BnaA01g01300D	chrA01	311	357	Myb-binding site
BnaA01g01300D	chrA01	1702	1751	CTAG-motif
BnaA01g01300D	chrA01	1344	1390	GT1-motif
BnaA01g01300D	chrA01	417	463	G-box
BnaA01g01300D	chrA01	1147	1193	G-box
BnaA01g01300D	chrA01	44	89	STRE
BnaA01g01300D	chrA01	388	433	STRE
BnaA01g01300D	chrA01	449	494	STRE
BnaA01g01300D	chrA01	417	463	ABRE3a
BnaA01g01300D	chrA01	1147	1193	ABRE3a
BnaA01g01300D	chrA01	126	171	TGACG-motif
BnaA01g01300D	chrA01	174	219	TGACG-motif
BnaA01g01300D	chrA01	888	934	G-Box
BnaA01g01300D	chrA01	1693	1739	TCT-motif
BnaA01g01300D	chrA01	1810	1856	TCT-motif
BnaA01g01300D	chrA01	1829	1875	TCT-motif
BnaA01g01300D	chrA01	1115	1163	GA-motif
BnaA01g01300D	chrA01	421	468	TATA-box
BnaA01g01300D	chrA01	457	503	TATA-box
BnaA01g01300D	chrA01	458	502	TATA-box
BnaA01g01300D	chrA01	530	576	TATA-box
BnaA01g01300D	chrA01	531	575	TATA-box
BnaA01g01300D	chrA01	627	674	TATA-box
BnaA01g01300D	chrA01	628	674	TATA-box
BnaA01g01300D	chrA01	629	674	TATA-box
BnaA01g01300D	chrA01	630	674	TATA-box
BnaA01g01300D	chrA01	653	700	TATA-box
BnaA01g01300D	chrA01	654	700	TATA-box
BnaA01g01300D	chrA01	655	700	TATA-box
BnaA01g01300D	chrA01	656	700	TATA-box
BnaA01g01300D	chrA01	662	711	TATA-box
BnaA01g01300D	chrA01	663	709	TATA-box
BnaA01g01300D	chrA01	664	708	TATA-box
BnaA01g01300D	chrA01	1067	1113	TATA-box
BnaA01g01300D	chrA01	1069	1113	TATA-box
BnaA01g01300D	chrA01	1413	1459	TATA-box
BnaA01g01300D	chrA01	1414	1459	TATA-box
BnaA01g01300D	chrA01	1415	1459	TATA-box
BnaA01g01300D	chrA01	1546	1590	TATA-box
BnaA01g01300D	chrA01	1761	1807	TATA-box
BnaA01g01300D	chrA01	1762	1807	TATA-box
BnaA01g01300D	chrA01	1763	1807	TATA-box
BnaA01g01300D	chrA01	1930	1979	TATA-box
BnaA01g01300D	chrA01	1932	1976	TATA-box
BnaA01g01300D	chrA01	1502	1548	MYC
BnaA01g01300D	chrA01	1577	1623	MYC
BnaA01g01300D	chrA01	1579	1625	MYC
BnaA01g01300D	chrA01	292	338	TGA-element
BnaA01g01300D	chrA01	1527	1573	TGA-element
BnaA01g01300D	chrA01	1870	1916	TGA-element
BnaA01g01300D	chrA01	417	462	ABRE
BnaA01g01300D	chrA01	889	934	ABRE
BnaA01g01300D	chrA01	1148	1193	ABRE
BnaA01g01300D	chrA01	417	463	ABRE4
BnaA01g01300D	chrA01	1147	1193	ABRE4
BnaA01g01300D	chrA01	726	774	ERE
BnaA01g01300D	chrA01	1049	1097	ERE
BnaA01g01300D	chrA01	1209	1257	LAMP-element
BnaA01g01300D	chrA01	542	588	DRE core
BnaA01g01300D	chrA01	1876	1922	DRE core
BnaA01g01300D	chrA01	595	642	AuxRR-core
BnaA01g01300D	chrA01	1281	1328	AuxRR-core
BnaA01g01300D	chrA01	1123	1170	AAGAA-motif
BnaA01g01300D	chrA01	1236	1285	TC-rich repeats
BnaA01g01300D	chrA01	1365	1414	TC-rich repeats
BnaA01g13200D	chrA01	1781	1827	ARE
BnaA01g13200D	chrA01	1807	1851	TATA-box
BnaA01g13200D	chrA01	1967	2012	TATA-box
BnaA01g13200D	chrA01	1968	2012	TATA-box
BnaA01g13200D	chrA01	1847	1893	MYC
BnaA01g13200D	chrA01	1745	1794	WUN-motif
BnaA01g13200D	chrA01	1963	2009	TGA-element
BnaA01g13200D	chrA01	1917	1962	CAAT-box
BnaA01g13200D	chrA01	1954	1998	CAAT-box
BnaA01g13200D	chrA01	1798	1843	ABRE
BnaA01g13200D	chrA01	1858	1907.5	HD-Zip 3
BnaA01g13200D	chrA01	1939	1985	MYB
BnaA01g13200D	chrA01	1798	1844	G-Box
BnaA01g13200D	chrA01	1884	1933	circadian
BnaA01g13200D	chrA01	1731	1778	GCN4_motif
BnaA01g16780D	chrA01	1674	1721	MRE
BnaA01g16780D	chrA01	1330	1376	G-Box
BnaA01g16780D	chrA01	1445	1491	G-Box
BnaA01g16780D	chrA01	779	824	TGACG-motif
BnaA01g16780D	chrA01	1410	1455	TGACG-motif
BnaA01g16780D	chrA01	1613	1658	TGACG-motif
BnaA01g16780D	chrA01	435	481	MYC
BnaA01g16780D	chrA01	719	765	MYC
BnaA01g16780D	chrA01	829	875	MYC
BnaA01g16780D	chrA01	1428	1474	MYC
BnaA01g16780D	chrA01	1725	1771	TGA-element
BnaA01g16780D	chrA01	1880	1926	MBS
BnaA01g16780D	chrA01	-15	31	ARE
BnaA01g16780D	chrA01	79	125	TATA-box
BnaA01g16780D	chrA01	81	125	TATA-box
BnaA01g16780D	chrA01	116	163	TATA-box
BnaA01g16780D	chrA01	117	163	TATA-box
BnaA01g16780D	chrA01	118	165	TATA-box
BnaA01g16780D	chrA01	119	165	TATA-box
BnaA01g16780D	chrA01	120	166	TATA-box
BnaA01g16780D	chrA01	121	165	TATA-box
BnaA01g16780D	chrA01	161	207	TATA-box
BnaA01g16780D	chrA01	162	206	TATA-box
BnaA01g16780D	chrA01	177	223	TATA-box
BnaA01g16780D	chrA01	178	222	TATA-box
BnaA01g16780D	chrA01	188	234	TATA-box
BnaA01g16780D	chrA01	190	234	TATA-box
BnaA01g16780D	chrA01	192	240	TATA-box
BnaA01g16780D	chrA01	193	240	TATA-box
BnaA01g16780D	chrA01	194	240	TATA-box
BnaA01g16780D	chrA01	195	240	TATA-box
BnaA01g16780D	chrA01	196	240	TATA-box
BnaA01g16780D	chrA01	232	278	TATA-box
BnaA01g16780D	chrA01	233	277	TATA-box
BnaA01g16780D	chrA01	255	302	TATA-box
BnaA01g16780D	chrA01	256	302	TATA-box
BnaA01g16780D	chrA01	257	304	TATA-box
BnaA01g16780D	chrA01	258	304	TATA-box
BnaA01g16780D	chrA01	259	305	TATA-box
BnaA01g16780D	chrA01	260	304	TATA-box
BnaA01g16780D	chrA01	264	311	TATA-box
BnaA01g16780D	chrA01	265	311	TATA-box
BnaA01g16780D	chrA01	266	311	TATA-box
BnaA01g16780D	chrA01	267	311	TATA-box
BnaA01g16780D	chrA01	274	326	TATA-box
BnaA01g16780D	chrA01	276	324	TATA-box
BnaA01g16780D	chrA01	277	324	TATA-box
BnaA01g16780D	chrA01	278	324	TATA-box
BnaA01g16780D	chrA01	279	324	TATA-box
BnaA01g16780D	chrA01	280	324	TATA-box
BnaA01g16780D	chrA01	317	363	TATA-box
BnaA01g16780D	chrA01	318	362	TATA-box
BnaA01g16780D	chrA01	322	369	TATA-box
BnaA01g16780D	chrA01	323	369	TATA-box
BnaA01g16780D	chrA01	324	369	TATA-box
BnaA01g16780D	chrA01	325	369	TATA-box
BnaA01g16780D	chrA01	395	442	TATA-box
BnaA01g16780D	chrA01	416	464	TATA-box
BnaA01g16780D	chrA01	428	475	TATA-box
BnaA01g16780D	chrA01	429	475	TATA-box
BnaA01g16780D	chrA01	430	475	TATA-box
BnaA01g16780D	chrA01	431	475	TATA-box
BnaA01g16780D	chrA01	613	659	TATA-box
BnaA01g16780D	chrA01	614	660	TATA-box
BnaA01g16780D	chrA01	615	661	TATA-box
BnaA01g16780D	chrA01	616	660	TATA-box
BnaA01g16780D	chrA01	655	702	TATA-box
BnaA01g16780D	chrA01	662	709	TATA-box
BnaA01g16780D	chrA01	1092	1136	TATA-box
BnaA01g16780D	chrA01	1391	1435	TATA-box
BnaA01g16780D	chrA01	1404	1450	TATA-box
BnaA01g16780D	chrA01	1405	1449	TATA-box
BnaA01g16780D	chrA01	1495	1539	TATA-box
BnaA01g16780D	chrA01	1687	1733	TATA-box
BnaA01g16780D	chrA01	1689	1733	TATA-box
BnaA01g16780D	chrA01	1710	1756	TATA-box
BnaA01g16780D	chrA01	1712	1756	TATA-box
BnaA01g16780D	chrA01	1729	1774	TATA-box
BnaA01g16780D	chrA01	1730	1774	TATA-box
BnaA01g16780D	chrA01	1944	1988	TATA-box
BnaA01g16780D	chrA01	1583	1630	DRE1
BnaA01g16780D	chrA01	375	425	AT-rich element
BnaA01g16780D	chrA01	1172	1220	AE-box
BnaA01g16780D	chrA01	1208	1256	AE-box
BnaA01g16780D	chrA01	100	148	ERE
BnaA01g16780D	chrA01	102	150	ERE
BnaA01g16780D	chrA01	1017	1065	ERE
BnaA01g16780D	chrA01	1331	1376	ABRE
BnaA01g16780D	chrA01	1443	1492	ABRE
BnaA01g16780D	chrA01	1445	1491	ABRE
BnaA01g16780D	chrA01	1446	1491	ABRE
BnaA01g16780D	chrA01	544	591	AAGAA-motif
BnaA01g16780D	chrA01	909	958	AAGAA-motif
BnaA01g16780D	chrA01	1927	1974	AAGAA-motif
BnaA01g16780D	chrA01	1931	1978	AAGAA-motif
BnaA01g16780D	chrA01	1126	1173	AuxRR-core
BnaA01g16780D	chrA01	1880	1926	Myb
BnaA01g16780D	chrA01	1906	1955	circadian
BnaA01g16780D	chrA01	243	289	Box 4
BnaA01g16780D	chrA01	470	516	Box 4
BnaA01g16780D	chrA01	1342	1388	Box 4
BnaA01g16780D	chrA01	1476	1522	Box 4
BnaA01g16780D	chrA01	779	824	CGTCA-motif
BnaA01g16780D	chrA01	1410	1455	CGTCA-motif
BnaA01g16780D	chrA01	1613	1658	CGTCA-motif
BnaA01g16780D	chrA01	1672	1718	GT1-motif
BnaA01g16780D	chrA01	115	163	TATA
BnaA01g16780D	chrA01	427	475	TATA
BnaA01g16780D	chrA01	117	165	AT~TATA-box
BnaA01g16780D	chrA01	119	165	AT~TATA-box
BnaA01g16780D	chrA01	256	304	AT~TATA-box
BnaA01g16780D	chrA01	258	304	AT~TATA-box
BnaA01g16780D	chrA01	614	660	AT~TATA-box
BnaA01g16780D	chrA01	1599	1645	CAT-box
BnaA01g16780D	chrA01	779	824	as-1
BnaA01g16780D	chrA01	1410	1455	as-1
BnaA01g16780D	chrA01	1613	1658	as-1
BnaA01g16780D	chrA01	-19	26	CAAT-box
BnaA01g16780D	chrA01	-18	26	CAAT-box
BnaA01g16780D	chrA01	-2	42	CAAT-box
BnaA01g16780D	chrA01	16	61	CAAT-box
BnaA01g16780D	chrA01	21	66	CAAT-box
BnaA01g16780D	chrA01	26	71	CAAT-box
BnaA01g16780D	chrA01	67	112	CAAT-box
BnaA01g16780D	chrA01	87	131	CAAT-box
BnaA01g16780D	chrA01	337	381	CAAT-box
BnaA01g16780D	chrA01	358	402	CAAT-box
BnaA01g16780D	chrA01	364	409	CAAT-box
BnaA01g16780D	chrA01	435	480	CAAT-box
BnaA01g16780D	chrA01	456	501	CAAT-box
BnaA01g16780D	chrA01	504	548	CAAT-box
BnaA01g16780D	chrA01	627	671	CAAT-box
BnaA01g16780D	chrA01	824	868	CAAT-box
BnaA01g16780D	chrA01	829	874	CAAT-box
BnaA01g16780D	chrA01	1002	1047	CAAT-box
BnaA01g16780D	chrA01	1007	1051	CAAT-box
BnaA01g16780D	chrA01	1031	1075	CAAT-box
BnaA01g16780D	chrA01	1066	1111	CAAT-box
BnaA01g16780D	chrA01	1307	1352	CAAT-box
BnaA01g16780D	chrA01	1346	1390	CAAT-box
BnaA01g16780D	chrA01	1428	1473	CAAT-box
BnaA01g16780D	chrA01	1618	1663	CAAT-box
BnaA01g16780D	chrA01	1667	1712	CAAT-box
BnaA01g16780D	chrA01	1681	1725	CAAT-box
BnaA01g16780D	chrA01	1733	1777	CAAT-box
BnaA01g16780D	chrA01	1772	1817	CAAT-box
BnaA01g16780D	chrA01	1830	1875	CAAT-box
BnaA01g16780D	chrA01	1839	1883	CAAT-box
BnaA01g16780D	chrA01	1417	1463	G-box
BnaA01g16780D	chrA01	1445	1491	G-box
BnaA01g17560D	chrA01	1870	1916	MYB recognition site
BnaA01g17560D	chrA01	1870	1916	CCAAT-box
BnaA01g17560D	chrA01	581	629	ERE
BnaA01g17560D	chrA01	675	723	ERE
BnaA01g17560D	chrA01	1399	1447	ERE
BnaA01g17560D	chrA01	1493	1541	ERE
BnaA01g17560D	chrA01	501	546	ABRE
BnaA01g17560D	chrA01	1906	1951	ABRE
BnaA01g17560D	chrA01	356	406	AT-rich element
BnaA01g17560D	chrA01	196	243	TATA-box
BnaA01g17560D	chrA01	197	243	TATA-box
BnaA01g17560D	chrA01	198	243	TATA-box
BnaA01g17560D	chrA01	199	243	TATA-box
BnaA01g17560D	chrA01	275	319	TATA-box
BnaA01g17560D	chrA01	378	425	TATA-box
BnaA01g17560D	chrA01	379	425	TATA-box
BnaA01g17560D	chrA01	380	426	TATA-box
BnaA01g17560D	chrA01	381	427	TATA-box
BnaA01g17560D	chrA01	382	428	TATA-box
BnaA01g17560D	chrA01	383	427	TATA-box
BnaA01g17560D	chrA01	460	504	TATA-box
BnaA01g17560D	chrA01	560	608	TATA-box
BnaA01g17560D	chrA01	602	648	TATA-box
BnaA01g17560D	chrA01	603	647	TATA-box
BnaA01g17560D	chrA01	621	668	TATA-box
BnaA01g17560D	chrA01	622	668	TATA-box
BnaA01g17560D	chrA01	623	668	TATA-box
BnaA01g17560D	chrA01	624	668	TATA-box
BnaA01g17560D	chrA01	660	706	TATA-box
BnaA01g17560D	chrA01	662	708	TATA-box
BnaA01g17560D	chrA01	663	709	TATA-box
BnaA01g17560D	chrA01	664	710	TATA-box
BnaA01g17560D	chrA01	665	711	TATA-box
BnaA01g17560D	chrA01	666	710	TATA-box
BnaA01g17560D	chrA01	746	790	TATA-box
BnaA01g17560D	chrA01	802	848	TATA-box
BnaA01g17560D	chrA01	803	847	TATA-box
BnaA01g17560D	chrA01	809	855	TATA-box
BnaA01g17560D	chrA01	811	857	TATA-box
BnaA01g17560D	chrA01	812	858	TATA-box
BnaA01g17560D	chrA01	813	857	TATA-box
BnaA01g17560D	chrA01	903	949	TATA-box
BnaA01g17560D	chrA01	904	950	TATA-box
BnaA01g17560D	chrA01	905	951	TATA-box
BnaA01g17560D	chrA01	906	950	TATA-box
BnaA01g17560D	chrA01	929	976	TATA-box
BnaA01g17560D	chrA01	930	976	TATA-box
BnaA01g17560D	chrA01	931	978	TATA-box
BnaA01g17560D	chrA01	932	978	TATA-box
BnaA01g17560D	chrA01	933	979	TATA-box
BnaA01g17560D	chrA01	934	980	TATA-box
BnaA01g17560D	chrA01	935	981	TATA-box
BnaA01g17560D	chrA01	936	980	TATA-box
BnaA01g17560D	chrA01	942	986	TATA-box
BnaA01g17560D	chrA01	950	996	TATA-box
BnaA01g17560D	chrA01	951	996	TATA-box
BnaA01g17560D	chrA01	952	996	TATA-box
BnaA01g17560D	chrA01	1020	1067	TATA-box
BnaA01g17560D	chrA01	1028	1077	TATA-box
BnaA01g17560D	chrA01	1029	1076	TATA-box
BnaA01g17560D	chrA01	1030	1076	TATA-box
BnaA01g17560D	chrA01	1031	1078	TATA-box
BnaA01g17560D	chrA01	1032	1078	TATA-box
BnaA01g17560D	chrA01	1033	1079	TATA-box
BnaA01g17560D	chrA01	1034	1080	TATA-box
BnaA01g17560D	chrA01	1035	1081	TATA-box
BnaA01g17560D	chrA01	1036	1080	TATA-box
BnaA01g17560D	chrA01	1074	1122	TATA-box
BnaA01g17560D	chrA01	1130	1176	TATA-box
BnaA01g17560D	chrA01	1131	1175	TATA-box
BnaA01g17560D	chrA01	1141	1187	TATA-box
BnaA01g17560D	chrA01	1142	1187	TATA-box
BnaA01g17560D	chrA01	1143	1187	TATA-box
BnaA01g17560D	chrA01	1173	1221	TATA-box
BnaA01g17560D	chrA01	1226	1272	TATA-box
BnaA01g17560D	chrA01	1227	1272	TATA-box
BnaA01g17560D	chrA01	1228	1272	TATA-box
BnaA01g17560D	chrA01	1248	1294	TATA-box
BnaA01g17560D	chrA01	1249	1294	TATA-box
BnaA01g17560D	chrA01	1250	1294	TATA-box
BnaA01g17560D	chrA01	1356	1402	TATA-box
BnaA01g17560D	chrA01	1357	1404	TATA-box
BnaA01g17560D	chrA01	1358	1404	TATA-box
BnaA01g17560D	chrA01	1359	1405	TATA-box
BnaA01g17560D	chrA01	1360	1404	TATA-box
BnaA01g17560D	chrA01	1363	1412	TATA-box
BnaA01g17560D	chrA01	1364	1411	TATA-box
BnaA01g17560D	chrA01	1365	1411	TATA-box
BnaA01g17560D	chrA01	1366	1413	TATA-box
BnaA01g17560D	chrA01	1367	1413	TATA-box
BnaA01g17560D	chrA01	1368	1414	TATA-box
BnaA01g17560D	chrA01	1369	1413	TATA-box
BnaA01g17560D	chrA01	1374	1420	TATA-box
BnaA01g17560D	chrA01	1375	1420	TATA-box
BnaA01g17560D	chrA01	1376	1420	TATA-box
BnaA01g17560D	chrA01	1387	1433	TATA-box
BnaA01g17560D	chrA01	1388	1433	TATA-box
BnaA01g17560D	chrA01	1389	1433	TATA-box
BnaA01g17560D	chrA01	1429	1475	TATA-box
BnaA01g17560D	chrA01	1430	1475	TATA-box
BnaA01g17560D	chrA01	1431	1475	TATA-box
BnaA01g17560D	chrA01	1434	1480	TATA-box
BnaA01g17560D	chrA01	1435	1480	TATA-box
BnaA01g17560D	chrA01	1436	1480	TATA-box
BnaA01g17560D	chrA01	1444	1491	TATA-box
BnaA01g17560D	chrA01	1445	1491	TATA-box
BnaA01g17560D	chrA01	1446	1491	TATA-box
BnaA01g17560D	chrA01	1447	1491	TATA-box
BnaA01g17560D	chrA01	1491	1539	TATA-box
BnaA01g17560D	chrA01	1522	1571	TATA-box
BnaA01g17560D	chrA01	1629	1675	TATA-box
BnaA01g17560D	chrA01	1630	1674	TATA-box
BnaA01g17560D	chrA01	1719	1763	TATA-box
BnaA01g17560D	chrA01	1742	1788	TATA-box
BnaA01g17560D	chrA01	1743	1788	TATA-box
BnaA01g17560D	chrA01	1744	1788	TATA-box
BnaA01g17560D	chrA01	8	54	ARE
BnaA01g17560D	chrA01	203	249	ARE
BnaA01g17560D	chrA01	259	305	ARE
BnaA01g17560D	chrA01	1185	1231	ARE
BnaA01g17560D	chrA01	762	811	AT-rich sequence
BnaA01g17560D	chrA01	32	78	MYC
BnaA01g17560D	chrA01	154	200	MYC
BnaA01g17560D	chrA01	838	884	MYC
BnaA01g17560D	chrA01	977	1023	MYC
BnaA01g17560D	chrA01	1290	1336	MYC
BnaA01g17560D	chrA01	315	360	TGACG-motif
BnaA01g17560D	chrA01	1820	1865	TGACG-motif
BnaA01g17560D	chrA01	1904	1949	TGACG-motif
BnaA01g17560D	chrA01	1190	1237	MRE
BnaA01g17560D	chrA01	501	547	G-Box
BnaA01g17560D	chrA01	1570	1618	dOCT
BnaA01g17560D	chrA01	130	176	WRE3
BnaA01g17560D	chrA01	55	101	W box
BnaA01g17560D	chrA01	1905	1951	G-box
BnaA01g17560D	chrA01	536	581	STRE
BnaA01g17560D	chrA01	48	94	MYB
BnaA01g17560D	chrA01	518	564	MYB
BnaA01g17560D	chrA01	315	360	as-1
BnaA01g17560D	chrA01	1820	1865	as-1
BnaA01g17560D	chrA01	1904	1949	as-1
BnaA01g17560D	chrA01	-15	29	CAAT-box
BnaA01g17560D	chrA01	16	61	CAAT-box
BnaA01g17560D	chrA01	32	77	CAAT-box
BnaA01g17560D	chrA01	68	112	CAAT-box
BnaA01g17560D	chrA01	89	133	CAAT-box
BnaA01g17560D	chrA01	168	212	CAAT-box
BnaA01g17560D	chrA01	251	296	CAAT-box
BnaA01g17560D	chrA01	290	335	CAAT-box
BnaA01g17560D	chrA01	291	335	CAAT-box
BnaA01g17560D	chrA01	301	345	CAAT-box
BnaA01g17560D	chrA01	347	392	CAAT-box
BnaA01g17560D	chrA01	469	514	CAAT-box
BnaA01g17560D	chrA01	593	638	CAAT-box
BnaA01g17560D	chrA01	600	644	CAAT-box
BnaA01g17560D	chrA01	806	851	CAAT-box
BnaA01g17560D	chrA01	838	883	CAAT-box
BnaA01g17560D	chrA01	895	939	CAAT-box
BnaA01g17560D	chrA01	900	945	CAAT-box
BnaA01g17560D	chrA01	921	965	CAAT-box
BnaA01g17560D	chrA01	977	1022	CAAT-box
BnaA01g17560D	chrA01	1009	1053	CAAT-box
BnaA01g17560D	chrA01	1082	1127	CAAT-box
BnaA01g17560D	chrA01	1201	1246	CAAT-box
BnaA01g17560D	chrA01	1262	1307	CAAT-box
BnaA01g17560D	chrA01	1280	1325	CAAT-box
BnaA01g17560D	chrA01	1281	1325	CAAT-box
BnaA01g17560D	chrA01	1290	1335	CAAT-box
BnaA01g17560D	chrA01	1304	1348	CAAT-box
BnaA01g17560D	chrA01	1308	1352	CAAT-box
BnaA01g17560D	chrA01	1384	1429	CAAT-box
BnaA01g17560D	chrA01	1420	1464	CAAT-box
BnaA01g17560D	chrA01	1590	1635	CAAT-box
BnaA01g17560D	chrA01	1615	1660	CAAT-box
BnaA01g17560D	chrA01	1623	1667	CAAT-box
BnaA01g17560D	chrA01	1694	1738	CAAT-box
BnaA01g17560D	chrA01	1700	1745	CAAT-box
BnaA01g17560D	chrA01	1865	1910	CAAT-box
BnaA01g17560D	chrA01	1866	1910	CAAT-box
BnaA01g17560D	chrA01	379	425	AT~TATA-box
BnaA01g17560D	chrA01	381	427	AT~TATA-box
BnaA01g17560D	chrA01	662	708	AT~TATA-box
BnaA01g17560D	chrA01	664	710	AT~TATA-box
BnaA01g17560D	chrA01	811	857	AT~TATA-box
BnaA01g17560D	chrA01	904	950	AT~TATA-box
BnaA01g17560D	chrA01	930	978	AT~TATA-box
BnaA01g17560D	chrA01	932	978	AT~TATA-box
BnaA01g17560D	chrA01	934	980	AT~TATA-box
BnaA01g17560D	chrA01	1030	1078	AT~TATA-box
BnaA01g17560D	chrA01	1032	1078	AT~TATA-box
BnaA01g17560D	chrA01	1034	1080	AT~TATA-box
BnaA01g17560D	chrA01	1358	1404	AT~TATA-box
BnaA01g17560D	chrA01	1365	1413	AT~TATA-box
BnaA01g17560D	chrA01	1367	1413	AT~TATA-box
BnaA01g17560D	chrA01	1443	1491	TATA
BnaA01g17560D	chrA01	315	360	CGTCA-motif
BnaA01g17560D	chrA01	1820	1865	CGTCA-motif
BnaA01g17560D	chrA01	1904	1949	CGTCA-motif
BnaA01g17560D	chrA01	449	495	Box 4
BnaA01g17560D	chrA01	1069	1115	Box 4
BnaA01g17560D	chrA01	1212	1258	Box 4
BnaA01g17560D	chrA01	1394	1440	Box 4
BnaA01g17560D	chrA01	1422	1468	Box 4
BnaA01g17560D	chrA01	1825	1871	Box 4
BnaA01g17560D	chrA01	1961	2007	Box 4
BnaA01g17560D	chrA01	500	549	O2-site
BnaA01g17560D	chrA01	1782	1832	O2-site
BnaA01g17560D	chrA01	1902	1951	O2-site
BnaA01g17560D	chrA01	731	779	chs-CMA1a
BnaA01g17560D	chrA01	1811	1859	chs-CMA1a
BnaA01g17560D	chrA01	720	769	circadian
BnaA01g17560D	chrA01	724	773	circadian
BnaA01g25670D	chrA01	1043	1089	W box
BnaA01g25670D	chrA01	1374	1420	G-box
BnaA01g25670D	chrA01	1965	2011	G-box
BnaA01g25670D	chrA01	506	553	GT1-motif
BnaA01g25670D	chrA01	796	842	GT1-motif
BnaA01g25670D	chrA01	1844	1890	GT1-motif
BnaA01g25670D	chrA01	892	938	CAT-box
BnaA01g25670D	chrA01	68	114	AT~TATA-box
BnaA01g25670D	chrA01	298	344	AT~TATA-box
BnaA01g25670D	chrA01	310	356	AT~TATA-box
BnaA01g25670D	chrA01	615	661	AT~TATA-box
BnaA01g25670D	chrA01	1267	1313	AT~TATA-box
BnaA01g25670D	chrA01	1269	1315	AT~TATA-box
BnaA01g25670D	chrA01	578	626	TATA
BnaA01g25670D	chrA01	1010	1055	as-1
BnaA01g25670D	chrA01	505	551	MYB
BnaA01g25670D	chrA01	797	843	MYB
BnaA01g25670D	chrA01	1332	1378	MYB
BnaA01g25670D	chrA01	15	59	CAAT-box
BnaA01g25670D	chrA01	33	78	CAAT-box
BnaA01g25670D	chrA01	43	87	CAAT-box
BnaA01g25670D	chrA01	64	108	CAAT-box
BnaA01g25670D	chrA01	129	174	CAAT-box
BnaA01g25670D	chrA01	243	287	CAAT-box
BnaA01g25670D	chrA01	259	304	CAAT-box
BnaA01g25670D	chrA01	319	364	CAAT-box
BnaA01g25670D	chrA01	399	443	CAAT-box
BnaA01g25670D	chrA01	416	460	CAAT-box
BnaA01g25670D	chrA01	516	560	CAAT-box
BnaA01g25670D	chrA01	573	617	CAAT-box
BnaA01g25670D	chrA01	611	656	CAAT-box
BnaA01g25670D	chrA01	677	721	CAAT-box
BnaA01g25670D	chrA01	683	727	CAAT-box
BnaA01g25670D	chrA01	786	830	CAAT-box
BnaA01g25670D	chrA01	901	946	CAAT-box
BnaA01g25670D	chrA01	1032	1077	CAAT-box
BnaA01g25670D	chrA01	1096	1140	CAAT-box
BnaA01g25670D	chrA01	1131	1175	CAAT-box
BnaA01g25670D	chrA01	1293	1337	CAAT-box
BnaA01g25670D	chrA01	1314	1358	CAAT-box
BnaA01g25670D	chrA01	1345	1390	CAAT-box
BnaA01g25670D	chrA01	1526	1571	CAAT-box
BnaA01g25670D	chrA01	1531	1575	CAAT-box
BnaA01g25670D	chrA01	1612	1656	CAAT-box
BnaA01g25670D	chrA01	1622	1666	CAAT-box
BnaA01g25670D	chrA01	1754	1798	CAAT-box
BnaA01g25670D	chrA01	1803	1848	CAAT-box
BnaA01g25670D	chrA01	1814	1859	CAAT-box
BnaA01g25670D	chrA01	1858	1903	CAAT-box
BnaA01g25670D	chrA01	1911	1956	CAAT-box
BnaA01g25670D	chrA01	485	534	TCA-element
BnaA01g25670D	chrA01	160	206	Box 4
BnaA01g25670D	chrA01	233	279	Box 4
BnaA01g25670D	chrA01	315	361	Box 4
BnaA01g25670D	chrA01	673	719	Box 4
BnaA01g25670D	chrA01	690	736	Box 4
BnaA01g25670D	chrA01	1010	1055	CGTCA-motif
BnaA01g25670D	chrA01	505	551	MYB-like sequence
BnaA01g25670D	chrA01	797	843	MYB-like sequence
BnaA01g25670D	chrA01	1332	1378	MYB-like sequence
BnaA01g25670D	chrA01	831	880	TC-rich repeats
BnaA01g25670D	chrA01	-11	38	AAGAA-motif
BnaA01g25670D	chrA01	27	76	AAGAA-motif
BnaA01g25670D	chrA01	660	707	AAGAA-motif
BnaA01g25670D	chrA01	955	1002	AAGAA-motif
BnaA01g25670D	chrA01	1782	1829	AAGAA-motif
BnaA01g25670D	chrA01	1471	1519	WUN-motif
BnaA01g25670D	chrA01	262	310	ERE
BnaA01g25670D	chrA01	264	312	ERE
BnaA01g25670D	chrA01	465	513	ERE
BnaA01g25670D	chrA01	1588	1636	ERE
BnaA01g25670D	chrA01	1606	1654	ERE
BnaA01g25670D	chrA01	1946	1991	ABRE
BnaA01g25670D	chrA01	1965	2010	ABRE
BnaA01g25670D	chrA01	1884	1930	TGA-element
BnaA01g25670D	chrA01	1890	1936	TGA-element
BnaA01g25670D	chrA01	1928	1974	TGA-element
BnaA01g25670D	chrA01	128	174	MYC
BnaA01g25670D	chrA01	901	947	MYC
BnaA01g25670D	chrA01	931	977	MYC
BnaA01g25670D	chrA01	1803	1849	MYC
BnaA01g25670D	chrA01	1858	1904	MYC
BnaA01g25670D	chrA01	155	201	ARE
BnaA01g25670D	chrA01	394	440	ARE
BnaA01g25670D	chrA01	802	848	ARE
BnaA01g25670D	chrA01	66	112	TATA-box
BnaA01g25670D	chrA01	68	114	TATA-box
BnaA01g25670D	chrA01	69	115	TATA-box
BnaA01g25670D	chrA01	70	114	TATA-box
BnaA01g25670D	chrA01	80	128	TATA-box
BnaA01g25670D	chrA01	103	147	TATA-box
BnaA01g25670D	chrA01	108	152	TATA-box
BnaA01g25670D	chrA01	205	252	TATA-box
BnaA01g25670D	chrA01	206	252	TATA-box
BnaA01g25670D	chrA01	207	252	TATA-box
BnaA01g25670D	chrA01	208	252	TATA-box
BnaA01g25670D	chrA01	279	327	TATA-box
BnaA01g25670D	chrA01	287	336	TATA-box
BnaA01g25670D	chrA01	288	335	TATA-box
BnaA01g25670D	chrA01	289	335	TATA-box
BnaA01g25670D	chrA01	290	335	TATA-box
BnaA01g25670D	chrA01	291	335	TATA-box
BnaA01g25670D	chrA01	297	344	TATA-box
BnaA01g25670D	chrA01	298	344	TATA-box
BnaA01g25670D	chrA01	300	344	TATA-box
BnaA01g25670D	chrA01	309	355	TATA-box
BnaA01g25670D	chrA01	310	356	TATA-box
BnaA01g25670D	chrA01	311	357	TATA-box
BnaA01g25670D	chrA01	312	356	TATA-box
BnaA01g25670D	chrA01	366	413	TATA-box
BnaA01g25670D	chrA01	377	423	TATA-box
BnaA01g25670D	chrA01	378	423	TATA-box
BnaA01g25670D	chrA01	379	423	TATA-box
BnaA01g25670D	chrA01	444	491	TATA-box
BnaA01g25670D	chrA01	445	491	TATA-box
BnaA01g25670D	chrA01	446	491	TATA-box
BnaA01g25670D	chrA01	447	491	TATA-box
BnaA01g25670D	chrA01	496	543	TATA-box
BnaA01g25670D	chrA01	499	545	TATA-box
BnaA01g25670D	chrA01	501	545	TATA-box
BnaA01g25670D	chrA01	511	557	TATA-box
BnaA01g25670D	chrA01	512	556	TATA-box
BnaA01g25670D	chrA01	537	583	TATA-box
BnaA01g25670D	chrA01	538	582	TATA-box
BnaA01g25670D	chrA01	577	622	TATA-box
BnaA01g25670D	chrA01	578	622	TATA-box
BnaA01g25670D	chrA01	614	660	TATA-box
BnaA01g25670D	chrA01	615	661	TATA-box
BnaA01g25670D	chrA01	616	662	TATA-box
BnaA01g25670D	chrA01	617	661	TATA-box
BnaA01g25670D	chrA01	764	811	TATA-box
BnaA01g25670D	chrA01	918	963	TATA-box
BnaA01g25670D	chrA01	919	963	TATA-box
BnaA01g25670D	chrA01	1081	1127	TATA-box
BnaA01g25670D	chrA01	1083	1127	TATA-box
BnaA01g25670D	chrA01	1267	1313	TATA-box
BnaA01g25670D	chrA01	1268	1314	TATA-box
BnaA01g25670D	chrA01	1269	1315	TATA-box
BnaA01g25670D	chrA01	1271	1315	TATA-box
BnaA01g25670D	chrA01	1556	1600	TATA-box
BnaA01g25670D	chrA01	1583	1629	TATA-box
BnaA01g25670D	chrA01	1584	1629	TATA-box
BnaA01g25670D	chrA01	1585	1629	TATA-box
BnaA01g25670D	chrA01	1640	1688	TATA-box
BnaA01g25670D	chrA01	1707	1751	TATA-box
BnaA01g25670D	chrA01	1749	1793	TATA-box
BnaA01g25670D	chrA01	1794	1841	TATA-box
BnaA01g25670D	chrA01	1950	1997	TATA-box
BnaA01g25670D	chrA01	1951	1997	TATA-box
BnaA01g25670D	chrA01	1952	1997	TATA-box
BnaA01g25670D	chrA01	1953	1997	TATA-box
BnaA01g25670D	chrA01	1099	1145	TCT-motif
BnaA01g25670D	chrA01	1946	1992	G-Box
BnaA01g25670D	chrA01	697	744	MRE
BnaA01g25670D	chrA01	1010	1055	TGACG-motif
BnaA01g27470D	chrA01	204	251	TATA-box
BnaA01g27470D	chrA01	209	257	TATA-box
BnaA01g27470D	chrA01	254	300	TATA-box
BnaA01g27470D	chrA01	255	300	TATA-box
BnaA01g27470D	chrA01	256	300	TATA-box
BnaA01g27470D	chrA01	426	473	TATA-box
BnaA01g27470D	chrA01	445	489	TATA-box
BnaA01g27470D	chrA01	725	769	TATA-box
BnaA01g27470D	chrA01	781	827	TATA-box
BnaA01g27470D	chrA01	782	826	TATA-box
BnaA01g27470D	chrA01	881	927	TATA-box
BnaA01g27470D	chrA01	883	927	TATA-box
BnaA01g27470D	chrA01	1181	1227	TATA-box
BnaA01g27470D	chrA01	1183	1227	TATA-box
BnaA01g27470D	chrA01	1194	1239	TATA-box
BnaA01g27470D	chrA01	1195	1239	TATA-box
BnaA01g27470D	chrA01	1219	1266	TATA-box
BnaA01g27470D	chrA01	1220	1266	TATA-box
BnaA01g27470D	chrA01	1221	1268	TATA-box
BnaA01g27470D	chrA01	1222	1268	TATA-box
BnaA01g27470D	chrA01	1223	1269	TATA-box
BnaA01g27470D	chrA01	1224	1268	TATA-box
BnaA01g27470D	chrA01	1231	1279	TATA-box
BnaA01g27470D	chrA01	1232	1279	TATA-box
BnaA01g27470D	chrA01	1233	1279	TATA-box
BnaA01g27470D	chrA01	1234	1279	TATA-box
BnaA01g27470D	chrA01	1235	1279	TATA-box
BnaA01g27470D	chrA01	1270	1314	TATA-box
BnaA01g27470D	chrA01	1468	1515	TATA-box
BnaA01g27470D	chrA01	1469	1515	TATA-box
BnaA01g27470D	chrA01	1470	1515	TATA-box
BnaA01g27470D	chrA01	1471	1515	TATA-box
BnaA01g27470D	chrA01	1593	1637	TATA-box
BnaA01g27470D	chrA01	1624	1668	TATA-box
BnaA01g27470D	chrA01	1701	1745	TATA-box
BnaA01g27470D	chrA01	1734	1782	TATA-box
BnaA01g27470D	chrA01	1957	2005	TATA-box
BnaA01g27470D	chrA01	65	110	TGACG-motif
BnaA01g27470D	chrA01	658	703	TGACG-motif
BnaA01g27470D	chrA01	989	1034	TGACG-motif
BnaA01g27470D	chrA01	1871	1916	TGACG-motif
BnaA01g27470D	chrA01	368	415	MRE
BnaA01g27470D	chrA01	907	953	G-Box
BnaA01g27470D	chrA01	1719	1765	G-Box
BnaA01g27470D	chrA01	177	223	ABRE3a
BnaA01g27470D	chrA01	627	673	ABRE3a
BnaA01g27470D	chrA01	1799	1845	ABRE3a
BnaA01g27470D	chrA01	1846	1892	ABRE3a
BnaA01g27470D	chrA01	563	609	TCT-motif
BnaA01g27470D	chrA01	982	1028	A-box
BnaA01g27470D	chrA01	298	345	Myc
BnaA01g27470D	chrA01	1212	1259	Myc
BnaA01g27470D	chrA01	1928	1977	ATCT-motif
BnaA01g27470D	chrA01	225	274	AAGAA-motif
BnaA01g27470D	chrA01	227	274	AAGAA-motif
BnaA01g27470D	chrA01	1775	1821	MYB recognition site
BnaA01g27470D	chrA01	194	243	TC-rich repeats
BnaA01g27470D	chrA01	227	276	TC-rich repeats
BnaA01g27470D	chrA01	559	608	TC-rich repeats
BnaA01g27470D	chrA01	1775	1821	CCAAT-box
BnaA01g27470D	chrA01	1486	1535	WUN-motif
BnaA01g27470D	chrA01	1365	1413	ERE
BnaA01g27470D	chrA01	1401	1449	ERE
BnaA01g27470D	chrA01	177	223	ABRE4
BnaA01g27470D	chrA01	627	673	ABRE4
BnaA01g27470D	chrA01	1799	1845	ABRE4
BnaA01g27470D	chrA01	1846	1892	ABRE4
BnaA01g27470D	chrA01	67	112	ABRE
BnaA01g27470D	chrA01	177	222	ABRE
BnaA01g27470D	chrA01	627	672	ABRE
BnaA01g27470D	chrA01	742	791	ABRE
BnaA01g27470D	chrA01	905	954	ABRE
BnaA01g27470D	chrA01	907	953	ABRE
BnaA01g27470D	chrA01	908	953	ABRE
BnaA01g27470D	chrA01	1719	1764	ABRE
BnaA01g27470D	chrA01	1800	1845	ABRE
BnaA01g27470D	chrA01	1846	1891	ABRE
BnaA01g27470D	chrA01	1873	1918	ABRE
BnaA01g27470D	chrA01	982	1028	CCGTCC-box
BnaA01g27470D	chrA01	836	884	AE-box
BnaA01g27470D	chrA01	65	110	CGTCA-motif
BnaA01g27470D	chrA01	658	703	CGTCA-motif
BnaA01g27470D	chrA01	989	1034	CGTCA-motif
BnaA01g27470D	chrA01	1871	1916	CGTCA-motif
BnaA01g27470D	chrA01	1238	1284	Box 4
BnaA01g27470D	chrA01	1384	1430	Box 4
BnaA01g27470D	chrA01	1023	1069	LTR
BnaA01g27470D	chrA01	1060	1106	LTR
BnaA01g27470D	chrA01	1546	1592	LTR
BnaA01g27470D	chrA01	1555	1601	LTR
BnaA01g27470D	chrA01	1628	1674	LTR
BnaA01g27470D	chrA01	1637	1683	LTR
BnaA01g27470D	chrA01	1645	1691	LTR
BnaA01g27470D	chrA01	1769	1818	O2-site
BnaA01g27470D	chrA01	1869	1918	O2-site
BnaA01g27470D	chrA01	1459	1507	chs-CMA1a
BnaA01g27470D	chrA01	1426	1472	MYB-like sequence
BnaA01g27470D	chrA01	1826	1872	MYB-like sequence
BnaA01g27470D	chrA01	982	1028	CCGTCC motif
BnaA01g27470D	chrA01	66	112	G-box
BnaA01g27470D	chrA01	177	223	G-box
BnaA01g27470D	chrA01	627	673	G-box
BnaA01g27470D	chrA01	906	954	G-box
BnaA01g27470D	chrA01	907	953	G-box
BnaA01g27470D	chrA01	1798	1846	G-box
BnaA01g27470D	chrA01	1799	1845	G-box
BnaA01g27470D	chrA01	1846	1892	G-box
BnaA01g27470D	chrA01	1872	1918	G-box
BnaA01g27470D	chrA01	314	359	STRE
BnaA01g27470D	chrA01	360	405	STRE
BnaA01g27470D	chrA01	920	965	STRE
BnaA01g27470D	chrA01	999	1044	STRE
BnaA01g27470D	chrA01	1676	1721	STRE
BnaA01g27470D	chrA01	1426	1472	MYB
BnaA01g27470D	chrA01	1766	1812	MYB
BnaA01g27470D	chrA01	1826	1872	MYB
BnaA01g27470D	chrA01	65	110	as-1
BnaA01g27470D	chrA01	658	703	as-1
BnaA01g27470D	chrA01	989	1034	as-1
BnaA01g27470D	chrA01	1871	1916	as-1
BnaA01g27470D	chrA01	89	134	CAAT-box
BnaA01g27470D	chrA01	94	138	CAAT-box
BnaA01g27470D	chrA01	103	147	CAAT-box
BnaA01g27470D	chrA01	324	369	CAAT-box
BnaA01g27470D	chrA01	453	497	CAAT-box
BnaA01g27470D	chrA01	483	527	CAAT-box
BnaA01g27470D	chrA01	487	531	CAAT-box
BnaA01g27470D	chrA01	540	584	CAAT-box
BnaA01g27470D	chrA01	550	594	CAAT-box
BnaA01g27470D	chrA01	656	700	CAAT-box
BnaA01g27470D	chrA01	729	773	CAAT-box
BnaA01g27470D	chrA01	740	784	CAAT-box
BnaA01g27470D	chrA01	831	876	CAAT-box
BnaA01g27470D	chrA01	934	978	CAAT-box
BnaA01g27470D	chrA01	1099	1143	CAAT-box
BnaA01g27470D	chrA01	1114	1159	CAAT-box
BnaA01g27470D	chrA01	1278	1322	CAAT-box
BnaA01g27470D	chrA01	1374	1418	CAAT-box
BnaA01g27470D	chrA01	1417	1462	CAAT-box
BnaA01g27470D	chrA01	1927	1971	CAAT-box
BnaA01g27470D	chrA01	1187	1234	GT1-motif
BnaA01g27470D	chrA01	1188	1234	GT1-motif
BnaA01g27470D	chrA01	1424	1471	GT1-motif
BnaA01g27470D	chrA01	1425	1471	GT1-motif
BnaA01g27470D	chrA01	1218	1266	TATA
BnaA01g27470D	chrA01	1224	1272	TATA
BnaA01g27470D	chrA01	1220	1268	AT~TATA-box
BnaA01g27470D	chrA01	1222	1268	AT~TATA-box
BnaA01g28850D	chrA01	32	76	CAAT-box
BnaA01g28850D	chrA01	55	99	CAAT-box
BnaA01g28850D	chrA01	66	110	CAAT-box
BnaA01g28850D	chrA01	283	328	CAAT-box
BnaA01g28850D	chrA01	322	366	CAAT-box
BnaA01g28850D	chrA01	369	413	CAAT-box
BnaA01g28850D	chrA01	386	430	CAAT-box
BnaA01g28850D	chrA01	459	503	CAAT-box
BnaA01g28850D	chrA01	532	576	CAAT-box
BnaA01g28850D	chrA01	546	591	CAAT-box
BnaA01g28850D	chrA01	744	788	CAAT-box
BnaA01g28850D	chrA01	756	801	CAAT-box
BnaA01g28850D	chrA01	757	801	CAAT-box
BnaA01g28850D	chrA01	857	901	CAAT-box
BnaA01g28850D	chrA01	876	920	CAAT-box
BnaA01g28850D	chrA01	888	933	CAAT-box
BnaA01g28850D	chrA01	912	956	CAAT-box
BnaA01g28850D	chrA01	1033	1078	CAAT-box
BnaA01g28850D	chrA01	1115	1159	CAAT-box
BnaA01g28850D	chrA01	1136	1180	CAAT-box
BnaA01g28850D	chrA01	1179	1223	CAAT-box
BnaA01g28850D	chrA01	1325	1370	CAAT-box
BnaA01g28850D	chrA01	1350	1394	CAAT-box
BnaA01g28850D	chrA01	1556	1601	CAAT-box
BnaA01g28850D	chrA01	1557	1601	CAAT-box
BnaA01g28850D	chrA01	1654	1699	CAAT-box
BnaA01g28850D	chrA01	1664	1708	CAAT-box
BnaA01g28850D	chrA01	1761	1806	CAAT-box
BnaA01g28850D	chrA01	1927	1971	CAAT-box
BnaA01g28850D	chrA01	1951	1995	CAAT-box
BnaA01g28850D	chrA01	1953	1998	CAAT-box
BnaA01g28850D	chrA01	1046	1092	MYB
BnaA01g28850D	chrA01	681	726	as-1
BnaA01g28850D	chrA01	1175	1220	as-1
BnaA01g28850D	chrA01	1859	1904	as-1
BnaA01g28850D	chrA01	951	997	AT~TATA-box
BnaA01g28850D	chrA01	1198	1244	AT~TATA-box
BnaA01g28850D	chrA01	1525	1571	AT~TATA-box
BnaA01g28850D	chrA01	936	984	TATA
BnaA01g28850D	chrA01	499	548	TCA
BnaA01g28850D	chrA01	677	726	TCA
BnaA01g28850D	chrA01	1489	1538	TCA
BnaA01g28850D	chrA01	1875	1927	ACA-motif
BnaA01g28850D	chrA01	1857	1903	G-box
BnaA01g28850D	chrA01	460	506	W box
BnaA01g28850D	chrA01	1319	1365	W box
BnaA01g28850D	chrA01	247	296	GATA-motif
BnaA01g28850D	chrA01	681	726	CGTCA-motif
BnaA01g28850D	chrA01	1175	1220	CGTCA-motif
BnaA01g28850D	chrA01	1859	1904	CGTCA-motif
BnaA01g28850D	chrA01	853	899	Box 4
BnaA01g28850D	chrA01	1457	1503	Box 4
BnaA01g28850D	chrA01	1461	1507	Box 4
BnaA01g28850D	chrA01	1477	1523	Box 4
BnaA01g28850D	chrA01	835	884	TCA-element
BnaA01g28850D	chrA01	1857	1902	ABRE
BnaA01g28850D	chrA01	1216	1264	AE-box
BnaA01g28850D	chrA01	1244	1290	Myb
BnaA01g28850D	chrA01	1741	1787	Myb
BnaA01g28850D	chrA01	1608	1657	ATCT-motif
BnaA01g28850D	chrA01	277	325	LAMP-element
BnaA01g28850D	chrA01	1700	1746	CCAAT-box
BnaA01g28850D	chrA01	827	876	AAGAA-motif
BnaA01g28850D	chrA01	968	1015	AAGAA-motif
BnaA01g28850D	chrA01	407	456	TC-rich repeats
BnaA01g28850D	chrA01	605	654	TC-rich repeats
BnaA01g28850D	chrA01	660	709	TC-rich repeats
BnaA01g28850D	chrA01	1700	1746	MYB recognition site
BnaA01g28850D	chrA01	681	726	TGACG-motif
BnaA01g28850D	chrA01	1175	1220	TGACG-motif
BnaA01g28850D	chrA01	1859	1904	TGACG-motif
BnaA01g28850D	chrA01	1641	1687	TCT-motif
BnaA01g28850D	chrA01	1904	1950	WRE3
BnaA01g28850D	chrA01	893	940	GCN4_motif
BnaA01g28850D	chrA01	26	72	TATA-box
BnaA01g28850D	chrA01	28	72	TATA-box
BnaA01g28850D	chrA01	239	285	TATA-box
BnaA01g28850D	chrA01	240	285	TATA-box
BnaA01g28850D	chrA01	241	285	TATA-box
BnaA01g28850D	chrA01	516	562	TATA-box
BnaA01g28850D	chrA01	517	562	TATA-box
BnaA01g28850D	chrA01	518	562	TATA-box
BnaA01g28850D	chrA01	581	630	TATA-box
BnaA01g28850D	chrA01	583	627	TATA-box
BnaA01g28850D	chrA01	645	694	TATA-box
BnaA01g28850D	chrA01	647	697	TATA-box
BnaA01g28850D	chrA01	648	695	TATA-box
BnaA01g28850D	chrA01	649	695	TATA-box
BnaA01g28850D	chrA01	650	695	TATA-box
BnaA01g28850D	chrA01	651	695	TATA-box
BnaA01g28850D	chrA01	810	857	TATA-box
BnaA01g28850D	chrA01	811	857	TATA-box
BnaA01g28850D	chrA01	812	857	TATA-box
BnaA01g28850D	chrA01	813	857	TATA-box
BnaA01g28850D	chrA01	869	913	TATA-box
BnaA01g28850D	chrA01	934	983	TATA-box
BnaA01g28850D	chrA01	936	980	TATA-box
BnaA01g28850D	chrA01	950	996	TATA-box
BnaA01g28850D	chrA01	951	997	TATA-box
BnaA01g28850D	chrA01	952	998	TATA-box
BnaA01g28850D	chrA01	953	997	TATA-box
BnaA01g28850D	chrA01	1030	1074	TATA-box
BnaA01g28850D	chrA01	1198	1244	TATA-box
BnaA01g28850D	chrA01	1199	1245	TATA-box
BnaA01g28850D	chrA01	1200	1244	TATA-box
BnaA01g28850D	chrA01	1213	1257	TATA-box
BnaA01g28850D	chrA01	1409	1457	TATA-box
BnaA01g28850D	chrA01	1410	1457	TATA-box
BnaA01g28850D	chrA01	1411	1457	TATA-box
BnaA01g28850D	chrA01	1412	1457	TATA-box
BnaA01g28850D	chrA01	1413	1457	TATA-box
BnaA01g28850D	chrA01	1443	1489	TATA-box
BnaA01g28850D	chrA01	1444	1488	TATA-box
BnaA01g28850D	chrA01	1467	1513	TATA-box
BnaA01g28850D	chrA01	1468	1513	TATA-box
BnaA01g28850D	chrA01	1469	1513	TATA-box
BnaA01g28850D	chrA01	1523	1569	TATA-box
BnaA01g28850D	chrA01	1524	1571	TATA-box
BnaA01g28850D	chrA01	1525	1571	TATA-box
BnaA01g28850D	chrA01	1527	1571	TATA-box
BnaA01g28850D	chrA01	1532	1578	TATA-box
BnaA01g28850D	chrA01	1533	1578	TATA-box
BnaA01g28850D	chrA01	1534	1578	TATA-box
BnaA01g28850D	chrA01	1559	1605	TATA-box
BnaA01g28850D	chrA01	1560	1605	TATA-box
BnaA01g28850D	chrA01	1561	1605	TATA-box
BnaA01g28850D	chrA01	1579	1625	TATA-box
BnaA01g28850D	chrA01	1581	1625	TATA-box
BnaA01g28850D	chrA01	1599	1643	TATA-box
BnaA01g28850D	chrA01	1633	1681	TATA-box
BnaA01g28850D	chrA01	1821	1865	TATA-box
BnaA01g28850D	chrA01	290	343	AT1-motif
BnaA01g28850D	chrA01	1751	1797	ARE
BnaA01g28850D	chrA01	1741	1787	MBS
BnaA01g32320D	chrA01	1940	1986	ABRE4
BnaA01g32320D	chrA01	245	291	ABRE
BnaA01g32320D	chrA01	246	291	ABRE
BnaA01g32320D	chrA01	1116	1161	ABRE
BnaA01g32320D	chrA01	1940	1985	ABRE
BnaA01g32320D	chrA01	178	225	AAGAA-motif
BnaA01g32320D	chrA01	156	202	MYB recognition site
BnaA01g32320D	chrA01	156	202	CCAAT-box
BnaA01g32320D	chrA01	1551	1600	WUN-motif
BnaA01g32320D	chrA01	1478	1527	ATCT-motif
BnaA01g32320D	chrA01	378	424	Myb
BnaA01g32320D	chrA01	597	643	Myb
BnaA01g32320D	chrA01	245	291	G-Box
BnaA01g32320D	chrA01	1152	1197	TGACG-motif
BnaA01g32320D	chrA01	1255	1300	TGACG-motif
BnaA01g32320D	chrA01	1031	1078	box S
BnaA01g32320D	chrA01	1940	1986	ABRE3a
BnaA01g32320D	chrA01	363	409	MYC
BnaA01g32320D	chrA01	365	411	MYC
BnaA01g32320D	chrA01	514	564.5	MBSI
BnaA01g32320D	chrA01	665	714	TATA-box
BnaA01g32320D	chrA01	666	713	TATA-box
BnaA01g32320D	chrA01	667	713	TATA-box
BnaA01g32320D	chrA01	668	713	TATA-box
BnaA01g32320D	chrA01	669	713	TATA-box
BnaA01g32320D	chrA01	1015	1059	TATA-box
BnaA01g32320D	chrA01	1492	1538	TATA-box
BnaA01g32320D	chrA01	1493	1538	TATA-box
BnaA01g32320D	chrA01	1494	1538	TATA-box
BnaA01g32320D	chrA01	1533	1577	TATA-box
BnaA01g32320D	chrA01	1754	1800	TATA-box
BnaA01g32320D	chrA01	1755	1799	TATA-box
BnaA01g32320D	chrA01	1871	1915	TATA-box
BnaA01g32320D	chrA01	1879	1925	TATA-box
BnaA01g32320D	chrA01	1880	1925	TATA-box
BnaA01g32320D	chrA01	1881	1925	TATA-box
BnaA01g32320D	chrA01	530	576	ARE
BnaA01g32320D	chrA01	548	594	ARE
BnaA01g32320D	chrA01	694	740	ARE
BnaA01g32320D	chrA01	768	814	ARE
BnaA01g32320D	chrA01	1089	1135	ARE
BnaA01g32320D	chrA01	1136	1182	Myb-binding site
BnaA01g32320D	chrA01	130	179	I-box
BnaA01g32320D	chrA01	1396	1444	I-box
BnaA01g32320D	chrA01	1798	1847	I-box
BnaA01g32320D	chrA01	1427	1476	CTAG-motif
BnaA01g32320D	chrA01	446	493	GT1-motif
BnaA01g32320D	chrA01	447	493	GT1-motif
BnaA01g32320D	chrA01	482	529	GT1-motif
BnaA01g32320D	chrA01	607	654	GT1-motif
BnaA01g32320D	chrA01	876	922	GT1-motif
BnaA01g32320D	chrA01	588	634	MYB
BnaA01g32320D	chrA01	606	652	MYB
BnaA01g32320D	chrA01	629	675	MYB
BnaA01g32320D	chrA01	1136	1182	MYB
BnaA01g32320D	chrA01	1487	1533	MYB
BnaA01g32320D	chrA01	1152	1197	as-1
BnaA01g32320D	chrA01	1255	1300	as-1
BnaA01g32320D	chrA01	373	418	CAAT-box
BnaA01g32320D	chrA01	545	590	CAAT-box
BnaA01g32320D	chrA01	585	630	CAAT-box
BnaA01g32320D	chrA01	612	657	CAAT-box
BnaA01g32320D	chrA01	958	1003	CAAT-box
BnaA01g32320D	chrA01	991	1035	CAAT-box
BnaA01g32320D	chrA01	1042	1086	CAAT-box
BnaA01g32320D	chrA01	1200	1245	CAAT-box
BnaA01g32320D	chrA01	1320	1365	CAAT-box
BnaA01g32320D	chrA01	1327	1371	CAAT-box
BnaA01g32320D	chrA01	1485	1530	CAAT-box
BnaA01g32320D	chrA01	1556	1600	CAAT-box
BnaA01g32320D	chrA01	1568	1612	CAAT-box
BnaA01g32320D	chrA01	1590	1634	CAAT-box
BnaA01g32320D	chrA01	1597	1641	CAAT-box
BnaA01g32320D	chrA01	1682	1727	CAAT-box
BnaA01g32320D	chrA01	1708	1752	CAAT-box
BnaA01g32320D	chrA01	1789	1833	CAAT-box
BnaA01g32320D	chrA01	1812	1857	CAAT-box
BnaA01g32320D	chrA01	1819	1864	CAAT-box
BnaA01g32320D	chrA01	1826	1870	CAAT-box
BnaA01g32320D	chrA01	1860	1904	CAAT-box
BnaA01g32320D	chrA01	1895	1939	CAAT-box
BnaA01g32320D	chrA01	310	359	Box II
BnaA01g32320D	chrA01	245	291	G-box
BnaA01g32320D	chrA01	1115	1161	G-box
BnaA01g32320D	chrA01	1940	1986	G-box
BnaA01g32320D	chrA01	606	652	MYB-like sequence
BnaA01g32320D	chrA01	629	675	MYB-like sequence
BnaA01g32320D	chrA01	1487	1533	MYB-like sequence
BnaA01g32320D	chrA01	461	507	LTR
BnaA01g32320D	chrA01	765	811	LTR
BnaA01g32320D	chrA01	1152	1197	CGTCA-motif
BnaA01g32320D	chrA01	1255	1300	CGTCA-motif
BnaA01g32320D	chrA01	1611	1657	Box 4
BnaA01g32320D	chrA01	1949	1995	Box 4
BnaA02g07130D	chrA02	556	602	Myb-binding site
BnaA02g07130D	chrA02	598	647	I-box
BnaA02g07130D	chrA02	1504	1551	P-box
BnaA02g07130D	chrA02	473	519	MYB
BnaA02g07130D	chrA02	556	602	MYB
BnaA02g07130D	chrA02	1393	1439	MYB
BnaA02g07130D	chrA02	1578	1624	MYB
BnaA02g07130D	chrA02	765	811	Sp1
BnaA02g07130D	chrA02	36	80	CAAT-box
BnaA02g07130D	chrA02	105	150	CAAT-box
BnaA02g07130D	chrA02	149	194	CAAT-box
BnaA02g07130D	chrA02	150	194	CAAT-box
BnaA02g07130D	chrA02	169	213	CAAT-box
BnaA02g07130D	chrA02	176	220	CAAT-box
BnaA02g07130D	chrA02	204	249	CAAT-box
BnaA02g07130D	chrA02	221	266	CAAT-box
BnaA02g07130D	chrA02	265	310	CAAT-box
BnaA02g07130D	chrA02	276	321	CAAT-box
BnaA02g07130D	chrA02	283	327	CAAT-box
BnaA02g07130D	chrA02	299	344	CAAT-box
BnaA02g07130D	chrA02	401	445	CAAT-box
BnaA02g07130D	chrA02	455	500	CAAT-box
BnaA02g07130D	chrA02	461	505	CAAT-box
BnaA02g07130D	chrA02	680	724	CAAT-box
BnaA02g07130D	chrA02	805	849	CAAT-box
BnaA02g07130D	chrA02	850	895	CAAT-box
BnaA02g07130D	chrA02	880	924	CAAT-box
BnaA02g07130D	chrA02	1080	1125	CAAT-box
BnaA02g07130D	chrA02	1103	1148	CAAT-box
BnaA02g07130D	chrA02	1125	1169	CAAT-box
BnaA02g07130D	chrA02	1271	1315	CAAT-box
BnaA02g07130D	chrA02	1300	1344	CAAT-box
BnaA02g07130D	chrA02	1348	1393	CAAT-box
BnaA02g07130D	chrA02	1406	1451	CAAT-box
BnaA02g07130D	chrA02	1418	1462	CAAT-box
BnaA02g07130D	chrA02	1442	1486	CAAT-box
BnaA02g07130D	chrA02	1448	1492	CAAT-box
BnaA02g07130D	chrA02	1539	1583	CAAT-box
BnaA02g07130D	chrA02	1559	1603	CAAT-box
BnaA02g07130D	chrA02	1591	1635	CAAT-box
BnaA02g07130D	chrA02	1634	1679	CAAT-box
BnaA02g07130D	chrA02	1772	1816	CAAT-box
BnaA02g07130D	chrA02	1826	1870	CAAT-box
BnaA02g07130D	chrA02	1741	1787	CCGTCC motif
BnaA02g07130D	chrA02	1461	1507	G-box
BnaA02g07130D	chrA02	1802	1848	G-box
BnaA02g07130D	chrA02	473	519	MYB-like sequence
BnaA02g07130D	chrA02	1393	1439	MYB-like sequence
BnaA02g07130D	chrA02	112	161	O2-site
BnaA02g07130D	chrA02	1871	1917	LTR
BnaA02g07130D	chrA02	1889	1935	LTR
BnaA02g07130D	chrA02	669	714	CGTCA-motif
BnaA02g07130D	chrA02	1211	1261	AT-rich element
BnaA02g07130D	chrA02	1419	1469	AT-rich element
BnaA02g07130D	chrA02	1741	1787	CCGTCC-box
BnaA02g07130D	chrA02	1595	1643	AE-box
BnaA02g07130D	chrA02	1461	1507	ABRE4
BnaA02g07130D	chrA02	1802	1848	ABRE4
BnaA02g07130D	chrA02	1462	1507	ABRE
BnaA02g07130D	chrA02	1803	1848	ABRE
BnaA02g07130D	chrA02	779	826	AuxRR-core
BnaA02g07130D	chrA02	1865	1912	AuxRR-core
BnaA02g07130D	chrA02	1696	1745	WUN-motif
BnaA02g07130D	chrA02	744	790	WRE3
BnaA02g07130D	chrA02	760	806	WRE3
BnaA02g07130D	chrA02	1674	1720	TCT-motif
BnaA02g07130D	chrA02	952	998	MBS
BnaA02g07130D	chrA02	1922	1968	MBS
BnaA02g07130D	chrA02	1084	1130	TGA-element
BnaA02g07130D	chrA02	104	150	MYC
BnaA02g07130D	chrA02	204	250	MYC
BnaA02g07130D	chrA02	276	322	MYC
BnaA02g07130D	chrA02	455	501	MYC
BnaA02g07130D	chrA02	629	675	MYC
BnaA02g07130D	chrA02	706	752	MYC
BnaA02g07130D	chrA02	708	754	MYC
BnaA02g07130D	chrA02	738	784	MYC
BnaA02g07130D	chrA02	850	896	MYC
BnaA02g07130D	chrA02	1103	1149	MYC
BnaA02g07130D	chrA02	1348	1394	MYC
BnaA02g07130D	chrA02	51	101.5	MBSI
BnaA02g07130D	chrA02	42	88	TATA-box
BnaA02g07130D	chrA02	43	89	TATA-box
BnaA02g07130D	chrA02	44	88	TATA-box
BnaA02g07130D	chrA02	161	207	TATA-box
BnaA02g07130D	chrA02	162	207	TATA-box
BnaA02g07130D	chrA02	163	207	TATA-box
BnaA02g07130D	chrA02	186	234	TATA-box
BnaA02g07130D	chrA02	191	237	TATA-box
BnaA02g07130D	chrA02	192	238	TATA-box
BnaA02g07130D	chrA02	193	239	TATA-box
BnaA02g07130D	chrA02	194	238	TATA-box
BnaA02g07130D	chrA02	285	331	TATA-box
BnaA02g07130D	chrA02	286	332	TATA-box
BnaA02g07130D	chrA02	288	332	TATA-box
BnaA02g07130D	chrA02	333	379	TATA-box
BnaA02g07130D	chrA02	335	379	TATA-box
BnaA02g07130D	chrA02	413	458	TATA-box
BnaA02g07130D	chrA02	414	458	TATA-box
BnaA02g07130D	chrA02	516	565	TATA-box
BnaA02g07130D	chrA02	518	564	TATA-box
BnaA02g07130D	chrA02	519	565	TATA-box
BnaA02g07130D	chrA02	520	564	TATA-box
BnaA02g07130D	chrA02	1015	1063	TATA-box
BnaA02g07130D	chrA02	1018	1065	TATA-box
BnaA02g07130D	chrA02	1019	1065	TATA-box
BnaA02g07130D	chrA02	1020	1066	TATA-box
BnaA02g07130D	chrA02	1021	1065	TATA-box
BnaA02g07130D	chrA02	1361	1407	TATA-box
BnaA02g07130D	chrA02	1362	1409	TATA-box
BnaA02g07130D	chrA02	1363	1409	TATA-box
BnaA02g07130D	chrA02	1364	1410	TATA-box
BnaA02g07130D	chrA02	1365	1409	TATA-box
BnaA02g07130D	chrA02	1388	1435	TATA-box
BnaA02g07130D	chrA02	1389	1435	TATA-box
BnaA02g07130D	chrA02	1390	1435	TATA-box
BnaA02g07130D	chrA02	1391	1435	TATA-box
BnaA02g07130D	chrA02	1427	1471	TATA-box
BnaA02g07130D	chrA02	1792	1836	TATA-box
BnaA02g07130D	chrA02	1797	1844	TATA-box
BnaA02g07130D	chrA02	1798	1844	TATA-box
BnaA02g07130D	chrA02	1799	1844	TATA-box
BnaA02g07130D	chrA02	1800	1844	TATA-box
BnaA02g07130D	chrA02	1880	1924	TATA-box
BnaA02g07130D	chrA02	420	469	CTAG-motif
BnaA02g07130D	chrA02	42	88	AT~TATA-box
BnaA02g07130D	chrA02	192	238	AT~TATA-box
BnaA02g07130D	chrA02	286	332	AT~TATA-box
BnaA02g07130D	chrA02	333	379	AT~TATA-box
BnaA02g07130D	chrA02	518	564	AT~TATA-box
BnaA02g07130D	chrA02	1019	1065	AT~TATA-box
BnaA02g07130D	chrA02	1363	1409	AT~TATA-box
BnaA02g07130D	chrA02	1387	1435	TATA
BnaA02g07130D	chrA02	669	714	as-1
BnaA02g07130D	chrA02	929	976	GATA-motif
BnaA02g07130D	chrA02	934	981	GATA-motif
BnaA02g07130D	chrA02	1030	1078	chs-CMA1a
BnaA02g07130D	chrA02	228	274	Box 4
BnaA02g07130D	chrA02	310	356	Box 4
BnaA02g07130D	chrA02	314	360	Box 4
BnaA02g07130D	chrA02	1051	1097	Box 4
BnaA02g07130D	chrA02	1874	1920	GC-motif
BnaA02g07130D	chrA02	1012	1061	TC-rich repeats
BnaA02g07130D	chrA02	46	93	Myc
BnaA02g07130D	chrA02	952	998	Myb
BnaA02g07130D	chrA02	1922	1968	Myb
BnaA02g07130D	chrA02	1741	1787	A-box
BnaA02g07130D	chrA02	669	714	TGACG-motif
BnaA02g07130D	chrA02	1461	1507	ABRE3a
BnaA02g07130D	chrA02	1802	1848	ABRE3a
BnaA02g07130D	chrA02	822	868	ARE
BnaA02g07130D	chrA02	1144	1190	ARE
BnaA02g07130D	chrA02	1636	1682	ARE
BnaA02g10330D	chrA02	189	238	MSA-like
BnaA02g10330D	chrA02	145	191	G-box
BnaA02g10330D	chrA02	414	460	G-box
BnaA02g10330D	chrA02	825	871	MYB
BnaA02g10330D	chrA02	1047	1093	MYB
BnaA02g10330D	chrA02	0	45	as-1
BnaA02g10330D	chrA02	413	458	as-1
BnaA02g10330D	chrA02	3	48	CAAT-box
BnaA02g10330D	chrA02	95	140	CAAT-box
BnaA02g10330D	chrA02	174	219	CAAT-box
BnaA02g10330D	chrA02	270	317	CAAT-box
BnaA02g10330D	chrA02	355	400	CAAT-box
BnaA02g10330D	chrA02	356	400	CAAT-box
BnaA02g10330D	chrA02	536	581	CAAT-box
BnaA02g10330D	chrA02	548	593	CAAT-box
BnaA02g10330D	chrA02	628	673	CAAT-box
BnaA02g10330D	chrA02	744	788	CAAT-box
BnaA02g10330D	chrA02	803	847	CAAT-box
BnaA02g10330D	chrA02	819	864	CAAT-box
BnaA02g10330D	chrA02	1054	1099	CAAT-box
BnaA02g10330D	chrA02	1071	1115	CAAT-box
BnaA02g10330D	chrA02	1130	1174	CAAT-box
BnaA02g10330D	chrA02	1204	1249	CAAT-box
BnaA02g10330D	chrA02	1212	1257	CAAT-box
BnaA02g10330D	chrA02	1279	1323	CAAT-box
BnaA02g10330D	chrA02	1385	1429	CAAT-box
BnaA02g10330D	chrA02	1408	1452	CAAT-box
BnaA02g10330D	chrA02	1513	1558	CAAT-box
BnaA02g10330D	chrA02	1921	1967	GT1-motif
BnaA02g10330D	chrA02	947	995	TATA
BnaA02g10330D	chrA02	1243	1291	TATA
BnaA02g10330D	chrA02	1750	1796	CAT-box
BnaA02g10330D	chrA02	1929	1975	CAT-box
BnaA02g10330D	chrA02	0	45	CGTCA-motif
BnaA02g10330D	chrA02	413	458	CGTCA-motif
BnaA02g10330D	chrA02	570	616	Box 4
BnaA02g10330D	chrA02	696	742	Box 4
BnaA02g10330D	chrA02	933	979	Box 4
BnaA02g10330D	chrA02	1259	1305	Box 4
BnaA02g10330D	chrA02	1445	1491	Box 4
BnaA02g10330D	chrA02	1454	1500	Box 4
BnaA02g10330D	chrA02	1571	1617	Box 4
BnaA02g10330D	chrA02	411	459	O2-site
BnaA02g10330D	chrA02	1611	1660	O2-site
BnaA02g10330D	chrA02	63	110	AuxRR-core
BnaA02g10330D	chrA02	557	605	ERE
BnaA02g10330D	chrA02	1332	1380	ERE
BnaA02g10330D	chrA02	880	929.5	HD-Zip 3
BnaA02g10330D	chrA02	982	1031.5	HD-Zip 3
BnaA02g10330D	chrA02	146	191	ABRE
BnaA02g10330D	chrA02	415	460	ABRE
BnaA02g10330D	chrA02	738	783	ABRE
BnaA02g10330D	chrA02	990	1037	ABRE
BnaA02g10330D	chrA02	1135	1180	ABRE
BnaA02g10330D	chrA02	473	519	TATA-box
BnaA02g10330D	chrA02	474	518	TATA-box
BnaA02g10330D	chrA02	583	629	TATA-box
BnaA02g10330D	chrA02	584	628	TATA-box
BnaA02g10330D	chrA02	592	638	TATA-box
BnaA02g10330D	chrA02	593	637	TATA-box
BnaA02g10330D	chrA02	600	646	TATA-box
BnaA02g10330D	chrA02	601	645	TATA-box
BnaA02g10330D	chrA02	703	749	TATA-box
BnaA02g10330D	chrA02	704	749	TATA-box
BnaA02g10330D	chrA02	705	749	TATA-box
BnaA02g10330D	chrA02	753	797	TATA-box
BnaA02g10330D	chrA02	784	828	TATA-box
BnaA02g10330D	chrA02	946	992	TATA-box
BnaA02g10330D	chrA02	947	991	TATA-box
BnaA02g10330D	chrA02	1088	1134	TATA-box
BnaA02g10330D	chrA02	1090	1134	TATA-box
BnaA02g10330D	chrA02	1119	1165	TATA-box
BnaA02g10330D	chrA02	1120	1165	TATA-box
BnaA02g10330D	chrA02	1121	1165	TATA-box
BnaA02g10330D	chrA02	1154	1201	TATA-box
BnaA02g10330D	chrA02	1155	1201	TATA-box
BnaA02g10330D	chrA02	1156	1201	TATA-box
BnaA02g10330D	chrA02	1157	1201	TATA-box
BnaA02g10330D	chrA02	1168	1214	TATA-box
BnaA02g10330D	chrA02	1169	1213	TATA-box
BnaA02g10330D	chrA02	1228	1275	TATA-box
BnaA02g10330D	chrA02	1229	1275	TATA-box
BnaA02g10330D	chrA02	1230	1275	TATA-box
BnaA02g10330D	chrA02	1231	1275	TATA-box
BnaA02g10330D	chrA02	1244	1291	TATA-box
BnaA02g10330D	chrA02	1245	1291	TATA-box
BnaA02g10330D	chrA02	1246	1291	TATA-box
BnaA02g10330D	chrA02	1247	1291	TATA-box
BnaA02g10330D	chrA02	1271	1317	TATA-box
BnaA02g10330D	chrA02	1272	1316	TATA-box
BnaA02g10330D	chrA02	1298	1345	TATA-box
BnaA02g10330D	chrA02	1309	1353	TATA-box
BnaA02g10330D	chrA02	1317	1369	TATA-box
BnaA02g10330D	chrA02	1320	1367	TATA-box
BnaA02g10330D	chrA02	1321	1367	TATA-box
BnaA02g10330D	chrA02	1322	1367	TATA-box
BnaA02g10330D	chrA02	1323	1367	TATA-box
BnaA02g10330D	chrA02	1423	1470	TATA-box
BnaA02g10330D	chrA02	1424	1470	TATA-box
BnaA02g10330D	chrA02	1425	1470	TATA-box
BnaA02g10330D	chrA02	1426	1470	TATA-box
BnaA02g10330D	chrA02	1431	1478	TATA-box
BnaA02g10330D	chrA02	1439	1486	TATA-box
BnaA02g10330D	chrA02	1440	1486	TATA-box
BnaA02g10330D	chrA02	1441	1486	TATA-box
BnaA02g10330D	chrA02	1442	1486	TATA-box
BnaA02g10330D	chrA02	1539	1586	TATA-box
BnaA02g10330D	chrA02	1540	1586	TATA-box
BnaA02g10330D	chrA02	1541	1586	TATA-box
BnaA02g10330D	chrA02	1542	1586	TATA-box
BnaA02g10330D	chrA02	1904	1951	TATA-box
BnaA02g10330D	chrA02	1948	1994	TATA-box
BnaA02g10330D	chrA02	1949	1994	TATA-box
BnaA02g10330D	chrA02	1950	1994	TATA-box
BnaA02g10330D	chrA02	711	757	ARE
BnaA02g10330D	chrA02	1013	1059	ARE
BnaA02g10330D	chrA02	1161	1207	ARE
BnaA02g10330D	chrA02	1941	1987	ARE
BnaA02g10330D	chrA02	221	267	TGA-element
BnaA02g10330D	chrA02	1912	1958	TGA-element
BnaA02g10330D	chrA02	0	45	TGACG-motif
BnaA02g10330D	chrA02	413	458	TGACG-motif
BnaA02g10330D	chrA02	737	783	G-Box
BnaA02g10330D	chrA02	1135	1181	G-Box
BnaA02g10330D	chrA02	17	64	box S
BnaA02g10330D	chrA02	10	56	WRE3
BnaA02g10330D	chrA02	1758	1804	WRE3
BnaA02g10330D	chrA02	131	178	TCCC-motif
BnaA02g15070D	chrA02	361	410	GATA-motif
BnaA02g15070D	chrA02	477	524	GATA-motif
BnaA02g15070D	chrA02	1584	1630	MYB-like sequence
BnaA02g15070D	chrA02	1878	1928	L-box
BnaA02g15070D	chrA02	12	57	CGTCA-motif
BnaA02g15070D	chrA02	1926	1971	CGTCA-motif
BnaA02g15070D	chrA02	1566	1612	Box 4
BnaA02g15070D	chrA02	665	714	O2-site
BnaA02g15070D	chrA02	405	451	LTR
BnaA02g15070D	chrA02	1349	1395	LTR
BnaA02g15070D	chrA02	1141	1190	TCA-element
BnaA02g15070D	chrA02	270	316	MYB
BnaA02g15070D	chrA02	848	894	MYB
BnaA02g15070D	chrA02	1584	1630	MYB
BnaA02g15070D	chrA02	1673	1719	MYB
BnaA02g15070D	chrA02	12	57	as-1
BnaA02g15070D	chrA02	1926	1971	as-1
BnaA02g15070D	chrA02	-17	27	CAAT-box
BnaA02g15070D	chrA02	158	203	CAAT-box
BnaA02g15070D	chrA02	694	738	CAAT-box
BnaA02g15070D	chrA02	808	852	CAAT-box
BnaA02g15070D	chrA02	818	862	CAAT-box
BnaA02g15070D	chrA02	846	891	CAAT-box
BnaA02g15070D	chrA02	1056	1100	CAAT-box
BnaA02g15070D	chrA02	1081	1125	CAAT-box
BnaA02g15070D	chrA02	1090	1134	CAAT-box
BnaA02g15070D	chrA02	1200	1245	CAAT-box
BnaA02g15070D	chrA02	1210	1254	CAAT-box
BnaA02g15070D	chrA02	1252	1297	CAAT-box
BnaA02g15070D	chrA02	1258	1303	CAAT-box
BnaA02g15070D	chrA02	1362	1406	CAAT-box
BnaA02g15070D	chrA02	1397	1442	CAAT-box
BnaA02g15070D	chrA02	1403	1447	CAAT-box
BnaA02g15070D	chrA02	1455	1500	CAAT-box
BnaA02g15070D	chrA02	1479	1524	CAAT-box
BnaA02g15070D	chrA02	1490	1534	CAAT-box
BnaA02g15070D	chrA02	1597	1642	CAAT-box
BnaA02g15070D	chrA02	1679	1724	CAAT-box
BnaA02g15070D	chrA02	1692	1736	CAAT-box
BnaA02g15070D	chrA02	1702	1746	CAAT-box
BnaA02g15070D	chrA02	1760	1805	CAAT-box
BnaA02g15070D	chrA02	1969	2013	CAAT-box
BnaA02g15070D	chrA02	594	643	Box II
BnaA02g15070D	chrA02	1673	1719	Myb-binding site
BnaA02g15070D	chrA02	359	410	I-box
BnaA02g15070D	chrA02	361	409	I-box
BnaA02g15070D	chrA02	74	120	GT1-motif
BnaA02g15070D	chrA02	1585	1632	GT1-motif
BnaA02g15070D	chrA02	-5	42	P-box
BnaA02g15070D	chrA02	434	481	P-box
BnaA02g15070D	chrA02	761	807	AT~TATA-box
BnaA02g15070D	chrA02	978	1024	AT~TATA-box
BnaA02g15070D	chrA02	1195	1241	AT~TATA-box
BnaA02g15070D	chrA02	1260	1306	W box
BnaA02g15070D	chrA02	1831	1877	W box
BnaA02g15070D	chrA02	8	54	G-box
BnaA02g15070D	chrA02	1740	1786	G-box
BnaA02g15070D	chrA02	292	337	STRE
BnaA02g15070D	chrA02	480	525	STRE
BnaA02g15070D	chrA02	505	550	STRE
BnaA02g15070D	chrA02	1765	1810	STRE
BnaA02g15070D	chrA02	12	57	TGACG-motif
BnaA02g15070D	chrA02	1926	1971	TGACG-motif
BnaA02g15070D	chrA02	1648	1695	MRE
BnaA02g15070D	chrA02	219	267	dOCT
BnaA02g15070D	chrA02	718	764	TCT-motif
BnaA02g15070D	chrA02	729	775	TCT-motif
BnaA02g15070D	chrA02	1004	1050	TCT-motif
BnaA02g15070D	chrA02	1443	1489	TCT-motif
BnaA02g15070D	chrA02	128	176	chs-CMA2a
BnaA02g15070D	chrA02	305	351	TATA-box
BnaA02g15070D	chrA02	306	351	TATA-box
BnaA02g15070D	chrA02	307	351	TATA-box
BnaA02g15070D	chrA02	761	807	TATA-box
BnaA02g15070D	chrA02	762	808	TATA-box
BnaA02g15070D	chrA02	763	807	TATA-box
BnaA02g15070D	chrA02	778	827	TATA-box
BnaA02g15070D	chrA02	839	886	TATA-box
BnaA02g15070D	chrA02	877	923	TATA-box
BnaA02g15070D	chrA02	878	923	TATA-box
BnaA02g15070D	chrA02	879	923	TATA-box
BnaA02g15070D	chrA02	934	979	TATA-box
BnaA02g15070D	chrA02	935	979	TATA-box
BnaA02g15070D	chrA02	977	1023	TATA-box
BnaA02g15070D	chrA02	978	1024	TATA-box
BnaA02g15070D	chrA02	979	1025	TATA-box
BnaA02g15070D	chrA02	980	1024	TATA-box
BnaA02g15070D	chrA02	1000	1044	TATA-box
BnaA02g15070D	chrA02	1107	1154	TATA-box
BnaA02g15070D	chrA02	1108	1154	TATA-box
BnaA02g15070D	chrA02	1109	1154	TATA-box
BnaA02g15070D	chrA02	1110	1154	TATA-box
BnaA02g15070D	chrA02	1129	1177	TATA-box
BnaA02g15070D	chrA02	1147	1194	TATA-box
BnaA02g15070D	chrA02	1195	1241	TATA-box
BnaA02g15070D	chrA02	1196	1242	TATA-box
BnaA02g15070D	chrA02	1197	1241	TATA-box
BnaA02g15070D	chrA02	1297	1344	TATA-box
BnaA02g15070D	chrA02	1298	1344	TATA-box
BnaA02g15070D	chrA02	1299	1344	TATA-box
BnaA02g15070D	chrA02	1300	1344	TATA-box
BnaA02g15070D	chrA02	1370	1417	TATA-box
BnaA02g15070D	chrA02	1373	1419	TATA-box
BnaA02g15070D	chrA02	1375	1419	TATA-box
BnaA02g15070D	chrA02	1474	1523	TATA-box
BnaA02g15070D	chrA02	1685	1729	TATA-box
BnaA02g15070D	chrA02	558	604	ARE
BnaA02g15070D	chrA02	688	736	ERE
BnaA02g15070D	chrA02	9	54	ABRE
BnaA02g15070D	chrA02	1740	1785	ABRE
BnaA02g15070D	chrA02	716	763	Myc
BnaA02g15070D	chrA02	420	466	Myb
BnaA02g15070D	chrA02	1667	1713	Myb
BnaA02g15070D	chrA02	901	950	TC-rich repeats
BnaA02g15070D	chrA02	1004	1054	TC-rich repeats
BnaA02g15070D	chrA02	1770	1819	WUN-motif
BnaA02g19070D	chrA02	839	886	MRE
BnaA02g19070D	chrA02	313	358	TGACG-motif
BnaA02g19070D	chrA02	927	975	GA-motif
BnaA02g19070D	chrA02	350	396	ARE
BnaA02g19070D	chrA02	488	534	ARE
BnaA02g19070D	chrA02	771	817	ARE
BnaA02g19070D	chrA02	29	76	TATA-box
BnaA02g19070D	chrA02	76	122	TATA-box
BnaA02g19070D	chrA02	77	122	TATA-box
BnaA02g19070D	chrA02	78	122	TATA-box
BnaA02g19070D	chrA02	89	135	TATA-box
BnaA02g19070D	chrA02	90	134	TATA-box
BnaA02g19070D	chrA02	518	564	TATA-box
BnaA02g19070D	chrA02	519	563	TATA-box
BnaA02g19070D	chrA02	746	794	TATA-box
BnaA02g19070D	chrA02	926	970	TATA-box
BnaA02g19070D	chrA02	954	1000	TATA-box
BnaA02g19070D	chrA02	955	999	TATA-box
BnaA02g19070D	chrA02	973	1019	TATA-box
BnaA02g19070D	chrA02	974	1019	TATA-box
BnaA02g19070D	chrA02	975	1019	TATA-box
BnaA02g19070D	chrA02	977	1025	TATA-box
BnaA02g19070D	chrA02	1206	1255	TATA-box
BnaA02g19070D	chrA02	1208	1252	TATA-box
BnaA02g19070D	chrA02	1382	1428	TATA-box
BnaA02g19070D	chrA02	1383	1429	TATA-box
BnaA02g19070D	chrA02	1384	1430	TATA-box
BnaA02g19070D	chrA02	1385	1431	TATA-box
BnaA02g19070D	chrA02	1386	1432	TATA-box
BnaA02g19070D	chrA02	1387	1433	TATA-box
BnaA02g19070D	chrA02	1388	1434	TATA-box
BnaA02g19070D	chrA02	1389	1435	TATA-box
BnaA02g19070D	chrA02	1390	1436	TATA-box
BnaA02g19070D	chrA02	1391	1437	TATA-box
BnaA02g19070D	chrA02	1392	1438	TATA-box
BnaA02g19070D	chrA02	1393	1439	TATA-box
BnaA02g19070D	chrA02	1394	1440	TATA-box
BnaA02g19070D	chrA02	1395	1441	TATA-box
BnaA02g19070D	chrA02	1396	1442	TATA-box
BnaA02g19070D	chrA02	1397	1443	TATA-box
BnaA02g19070D	chrA02	1398	1444	TATA-box
BnaA02g19070D	chrA02	1399	1445	TATA-box
BnaA02g19070D	chrA02	1400	1446	TATA-box
BnaA02g19070D	chrA02	1401	1447	TATA-box
BnaA02g19070D	chrA02	1402	1448	TATA-box
BnaA02g19070D	chrA02	1403	1449	TATA-box
BnaA02g19070D	chrA02	1404	1450	TATA-box
BnaA02g19070D	chrA02	1405	1449	TATA-box
BnaA02g19070D	chrA02	1422	1469	TATA-box
BnaA02g19070D	chrA02	1509	1556	TATA-box
BnaA02g19070D	chrA02	1556	1602	TATA-box
BnaA02g19070D	chrA02	1557	1602	TATA-box
BnaA02g19070D	chrA02	1558	1602	TATA-box
BnaA02g19070D	chrA02	1569	1615	TATA-box
BnaA02g19070D	chrA02	1570	1614	TATA-box
BnaA02g19070D	chrA02	1915	1961	TATA-box
BnaA02g19070D	chrA02	1916	1960	TATA-box
BnaA02g19070D	chrA02	1802	1848	MYC
BnaA02g19070D	chrA02	551	597	TGA-element
BnaA02g19070D	chrA02	724	772	ERE
BnaA02g19070D	chrA02	730	778	ERE
BnaA02g19070D	chrA02	1152	1200	ERE
BnaA02g19070D	chrA02	666	713	Myc
BnaA02g19070D	chrA02	855	901	Myb
BnaA02g19070D	chrA02	1064	1110	Myb
BnaA02g19070D	chrA02	1113	1159	Myb
BnaA02g19070D	chrA02	1186	1232	Myb
BnaA02g19070D	chrA02	1218	1264	Myb
BnaA02g19070D	chrA02	987	1036	ATCT-motif
BnaA02g19070D	chrA02	592	641	TC-rich repeats
BnaA02g19070D	chrA02	423	469	MYB-like sequence
BnaA02g19070D	chrA02	254	303	circadian
BnaA02g19070D	chrA02	901	947	Box 4
BnaA02g19070D	chrA02	984	1030	Box 4
BnaA02g19070D	chrA02	1080	1126	Box 4
BnaA02g19070D	chrA02	1438	1484	Box 4
BnaA02g19070D	chrA02	313	358	CGTCA-motif
BnaA02g19070D	chrA02	190	236	LTR
BnaA02g19070D	chrA02	1670	1716	LTR
BnaA02g19070D	chrA02	1723	1769	LTR
BnaA02g19070D	chrA02	1738	1784	LTR
BnaA02g19070D	chrA02	313	358	as-1
BnaA02g19070D	chrA02	423	469	MYB
BnaA02g19070D	chrA02	43	88	CAAT-box
BnaA02g19070D	chrA02	48	92	CAAT-box
BnaA02g19070D	chrA02	161	206	CAAT-box
BnaA02g19070D	chrA02	178	223	CAAT-box
BnaA02g19070D	chrA02	213	258	CAAT-box
BnaA02g19070D	chrA02	214	258	CAAT-box
BnaA02g19070D	chrA02	420	464	CAAT-box
BnaA02g19070D	chrA02	426	471	CAAT-box
BnaA02g19070D	chrA02	427	471	CAAT-box
BnaA02g19070D	chrA02	486	531	CAAT-box
BnaA02g19070D	chrA02	525	570	CAAT-box
BnaA02g19070D	chrA02	713	757	CAAT-box
BnaA02g19070D	chrA02	778	823	CAAT-box
BnaA02g19070D	chrA02	895	940	CAAT-box
BnaA02g19070D	chrA02	934	979	CAAT-box
BnaA02g19070D	chrA02	1054	1099	CAAT-box
BnaA02g19070D	chrA02	1091	1136	CAAT-box
BnaA02g19070D	chrA02	1181	1225	CAAT-box
BnaA02g19070D	chrA02	1265	1309	CAAT-box
BnaA02g19070D	chrA02	1295	1340	CAAT-box
BnaA02g19070D	chrA02	1363	1407	CAAT-box
BnaA02g19070D	chrA02	1523	1568	CAAT-box
BnaA02g19070D	chrA02	1528	1572	CAAT-box
BnaA02g19070D	chrA02	1641	1686	CAAT-box
BnaA02g19070D	chrA02	1658	1703	CAAT-box
BnaA02g19070D	chrA02	1693	1738	CAAT-box
BnaA02g19070D	chrA02	1694	1738	CAAT-box
BnaA02g19070D	chrA02	1754	1799	CAAT-box
BnaA02g19070D	chrA02	1803	1848	CAAT-box
BnaA02g19070D	chrA02	1842	1886	CAAT-box
BnaA02g19070D	chrA02	1884	1928	CAAT-box
BnaA02g19070D	chrA02	1907	1951	CAAT-box
BnaA02g19070D	chrA02	1969	2013	CAAT-box
BnaA02g19070D	chrA02	571	618	GT1-motif
BnaA02g19070D	chrA02	572	618	GT1-motif
BnaA02g19070D	chrA02	1041	1087	GT1-motif
BnaA02g19070D	chrA02	1383	1429	AT~TATA-box
BnaA02g19070D	chrA02	1385	1431	AT~TATA-box
BnaA02g19070D	chrA02	1387	1433	AT~TATA-box
BnaA02g19070D	chrA02	1389	1435	AT~TATA-box
BnaA02g19070D	chrA02	1391	1437	AT~TATA-box
BnaA02g19070D	chrA02	1393	1439	AT~TATA-box
BnaA02g19070D	chrA02	1395	1441	AT~TATA-box
BnaA02g19070D	chrA02	1397	1443	AT~TATA-box
BnaA02g19070D	chrA02	1399	1445	AT~TATA-box
BnaA02g19070D	chrA02	1401	1447	AT~TATA-box
BnaA02g19070D	chrA02	1403	1449	AT~TATA-box
BnaA02g19070D	chrA02	78	126	TATA
BnaA02g19070D	chrA02	1558	1606	TATA
BnaA02g19070D	chrA02	1068	1115	TATC-box
BnaA02g26550D	chrA02	1294	1342	AE-box
BnaA02g26550D	chrA02	645	691	CCGTCC-box
BnaA02g26550D	chrA02	752	797	ABRE
BnaA02g26550D	chrA02	1695	1740	ABRE
BnaA02g26550D	chrA02	751	797	ABRE4
BnaA02g26550D	chrA02	186	235	AAGAA-motif
BnaA02g26550D	chrA02	469	516	AAGAA-motif
BnaA02g26550D	chrA02	63	110	AuxRR-core
BnaA02g26550D	chrA02	619	668	ATCT-motif
BnaA02g26550D	chrA02	20	66	TCT-motif
BnaA02g26550D	chrA02	667	713	TCT-motif
BnaA02g26550D	chrA02	1135	1181	WRE3
BnaA02g26550D	chrA02	439	485	MBS
BnaA02g26550D	chrA02	1299	1345	MBS
BnaA02g26550D	chrA02	107	153	MYC
BnaA02g26550D	chrA02	448	494	MYC
BnaA02g26550D	chrA02	593	639	MYC
BnaA02g26550D	chrA02	738	784	MYC
BnaA02g26550D	chrA02	986	1032	MYC
BnaA02g26550D	chrA02	1346	1392	MYC
BnaA02g26550D	chrA02	1388	1434	MYC
BnaA02g26550D	chrA02	1509	1555	MYC
BnaA02g26550D	chrA02	133	179	TATA-box
BnaA02g26550D	chrA02	134	179	TATA-box
BnaA02g26550D	chrA02	135	179	TATA-box
BnaA02g26550D	chrA02	381	425	TATA-box
BnaA02g26550D	chrA02	949	995	TATA-box
BnaA02g26550D	chrA02	950	995	TATA-box
BnaA02g26550D	chrA02	951	995	TATA-box
BnaA02g26550D	chrA02	971	1017	TATA-box
BnaA02g26550D	chrA02	972	1018	TATA-box
BnaA02g26550D	chrA02	973	1019	TATA-box
BnaA02g26550D	chrA02	974	1018	TATA-box
BnaA02g26550D	chrA02	1077	1123	TATA-box
BnaA02g26550D	chrA02	1078	1124	TATA-box
BnaA02g26550D	chrA02	1079	1123	TATA-box
BnaA02g26550D	chrA02	1146	1192	TATA-box
BnaA02g26550D	chrA02	1147	1193	TATA-box
BnaA02g26550D	chrA02	1149	1193	TATA-box
BnaA02g26550D	chrA02	1237	1283	TATA-box
BnaA02g26550D	chrA02	1239	1283	TATA-box
BnaA02g26550D	chrA02	1380	1426	TATA-box
BnaA02g26550D	chrA02	1381	1427	TATA-box
BnaA02g26550D	chrA02	1383	1427	TATA-box
BnaA02g26550D	chrA02	1489	1535	TATA-box
BnaA02g26550D	chrA02	1490	1534	TATA-box
BnaA02g26550D	chrA02	1671	1718	TATA-box
BnaA02g26550D	chrA02	926	973	DRE1
BnaA02g26550D	chrA02	1553	1599	CAT-box
BnaA02g26550D	chrA02	436	482	Myb-binding site
BnaA02g26550D	chrA02	1277	1326	I-box
BnaA02g26550D	chrA02	27	71	CAAT-box
BnaA02g26550D	chrA02	78	122	CAAT-box
BnaA02g26550D	chrA02	107	151	CAAT-box
BnaA02g26550D	chrA02	109	154	CAAT-box
BnaA02g26550D	chrA02	147	191	CAAT-box
BnaA02g26550D	chrA02	157	201	CAAT-box
BnaA02g26550D	chrA02	176	220	CAAT-box
BnaA02g26550D	chrA02	258	302	CAAT-box
BnaA02g26550D	chrA02	309	353	CAAT-box
BnaA02g26550D	chrA02	424	469	CAAT-box
BnaA02g26550D	chrA02	448	492	CAAT-box
BnaA02g26550D	chrA02	450	494	CAAT-box
BnaA02g26550D	chrA02	538	582	CAAT-box
BnaA02g26550D	chrA02	580	624	CAAT-box
BnaA02g26550D	chrA02	593	638	CAAT-box
BnaA02g26550D	chrA02	622	667	CAAT-box
BnaA02g26550D	chrA02	623	667	CAAT-box
BnaA02g26550D	chrA02	641	685	CAAT-box
BnaA02g26550D	chrA02	701	745	CAAT-box
BnaA02g26550D	chrA02	739	784	CAAT-box
BnaA02g26550D	chrA02	787	831	CAAT-box
BnaA02g26550D	chrA02	792	837	CAAT-box
BnaA02g26550D	chrA02	809	854	CAAT-box
BnaA02g26550D	chrA02	817	862	CAAT-box
BnaA02g26550D	chrA02	820	864	CAAT-box
BnaA02g26550D	chrA02	901	945	CAAT-box
BnaA02g26550D	chrA02	922	967	CAAT-box
BnaA02g26550D	chrA02	959	1004	CAAT-box
BnaA02g26550D	chrA02	977	1022	CAAT-box
BnaA02g26550D	chrA02	987	1032	CAAT-box
BnaA02g26550D	chrA02	1059	1103	CAAT-box
BnaA02g26550D	chrA02	1086	1130	CAAT-box
BnaA02g26550D	chrA02	1234	1279	CAAT-box
BnaA02g26550D	chrA02	1245	1289	CAAT-box
BnaA02g26550D	chrA02	1415	1459	CAAT-box
BnaA02g26550D	chrA02	1479	1524	CAAT-box
BnaA02g26550D	chrA02	1480	1524	CAAT-box
BnaA02g26550D	chrA02	1509	1554	CAAT-box
BnaA02g26550D	chrA02	1550	1594	CAAT-box
BnaA02g26550D	chrA02	1627	1671	CAAT-box
BnaA02g26550D	chrA02	1681	1725	CAAT-box
BnaA02g26550D	chrA02	1837	1882	CAAT-box
BnaA02g26550D	chrA02	1889	1933	CAAT-box
BnaA02g26550D	chrA02	1973	2018	CAAT-box
BnaA02g26550D	chrA02	9	55	MYB
BnaA02g26550D	chrA02	436	482	MYB
BnaA02g26550D	chrA02	1689	1735	MYB
BnaA02g26550D	chrA02	1894	1940	MYB
BnaA02g26550D	chrA02	751	797	G-box
BnaA02g26550D	chrA02	645	691	CCGTCC motif
BnaA02g26550D	chrA02	9	55	MYB-like sequence
BnaA02g26550D	chrA02	1894	1940	MYB-like sequence
BnaA02g26550D	chrA02	613	659	LTR
BnaA02g26550D	chrA02	1796	1841	CGTCA-motif
BnaA02g26550D	chrA02	549	597	ATC-motif
BnaA02g26550D	chrA02	303	351	ERE
BnaA02g26550D	chrA02	357	405	ERE
BnaA02g26550D	chrA02	320	366	CCAAT-box
BnaA02g26550D	chrA02	320	366	MYB recognition site
BnaA02g26550D	chrA02	439	485	Myb
BnaA02g26550D	chrA02	1299	1345	Myb
BnaA02g26550D	chrA02	1799	1845	Myb
BnaA02g26550D	chrA02	1884	1930	Myb
BnaA02g26550D	chrA02	1947	1993	Myb
BnaA02g26550D	chrA02	21	68	Myc
BnaA02g26550D	chrA02	383	430	Myc
BnaA02g26550D	chrA02	1650	1697	Myc
BnaA02g26550D	chrA02	645	691	A-box
BnaA02g26550D	chrA02	751	797	ABRE3a
BnaA02g26550D	chrA02	1796	1841	TGACG-motif
BnaA02g26550D	chrA02	1694	1740	G-Box
BnaA02g26550D	chrA02	1095	1141	ARE
BnaA02g26550D	chrA02	1905	1951	ARE
BnaA02g26550D	chrA02	972	1018	AT~TATA-box
BnaA02g26550D	chrA02	1077	1123	AT~TATA-box
BnaA02g26550D	chrA02	1147	1193	AT~TATA-box
BnaA02g26550D	chrA02	1381	1427	AT~TATA-box
BnaA02g26550D	chrA02	1239	1287	TATA
BnaA02g26550D	chrA02	8	54	GT1-motif
BnaA02g26550D	chrA02	839	886	GT1-motif
BnaA02g26550D	chrA02	1711	1758	GT1-motif
BnaA02g26550D	chrA02	1895	1942	GT1-motif
BnaA02g26550D	chrA02	1934	1980	GT1-motif
BnaA02g26550D	chrA02	1944	1990	GT1-motif
BnaA02g26550D	chrA02	1796	1841	as-1
BnaA02g26550D	chrA02	1521	1571	GTGGC-motif
BnaA02g26550D	chrA02	1834	1880	W box
BnaA02g26550D	chrA02	1165	1211	Box 4
BnaA02g33480D	chrA02	1162	1208	MYC
BnaA02g33480D	chrA02	1795	1841	MYC
BnaA02g33480D	chrA02	-18	26	TATA-box
BnaA02g33480D	chrA02	25	69	TATA-box
BnaA02g33480D	chrA02	100	146	TATA-box
BnaA02g33480D	chrA02	101	147	TATA-box
BnaA02g33480D	chrA02	102	148	TATA-box
BnaA02g33480D	chrA02	103	147	TATA-box
BnaA02g33480D	chrA02	322	369	TATA-box
BnaA02g33480D	chrA02	323	369	TATA-box
BnaA02g33480D	chrA02	324	369	TATA-box
BnaA02g33480D	chrA02	325	369	TATA-box
BnaA02g33480D	chrA02	349	395	TATA-box
BnaA02g33480D	chrA02	351	397	TATA-box
BnaA02g33480D	chrA02	353	397	TATA-box
BnaA02g33480D	chrA02	406	450	TATA-box
BnaA02g33480D	chrA02	494	542	TATA-box
BnaA02g33480D	chrA02	694	740	TATA-box
BnaA02g33480D	chrA02	696	742	TATA-box
BnaA02g33480D	chrA02	697	743	TATA-box
BnaA02g33480D	chrA02	698	742	TATA-box
BnaA02g33480D	chrA02	840	886	TATA-box
BnaA02g33480D	chrA02	841	885	TATA-box
BnaA02g33480D	chrA02	900	944	TATA-box
BnaA02g33480D	chrA02	958	1005	TATA-box
BnaA02g33480D	chrA02	959	1005	TATA-box
BnaA02g33480D	chrA02	960	1005	TATA-box
BnaA02g33480D	chrA02	961	1005	TATA-box
BnaA02g33480D	chrA02	1038	1082	TATA-box
BnaA02g33480D	chrA02	1319	1364	TATA-box
BnaA02g33480D	chrA02	1320	1364	TATA-box
BnaA02g33480D	chrA02	1538	1584	TATA-box
BnaA02g33480D	chrA02	1539	1584	TATA-box
BnaA02g33480D	chrA02	1540	1584	TATA-box
BnaA02g33480D	chrA02	1575	1622	TATA-box
BnaA02g33480D	chrA02	1603	1652	TATA-box
BnaA02g33480D	chrA02	1606	1653	TATA-box
BnaA02g33480D	chrA02	1607	1653	TATA-box
BnaA02g33480D	chrA02	1608	1653	TATA-box
BnaA02g33480D	chrA02	1609	1653	TATA-box
BnaA02g33480D	chrA02	1639	1686	TATA-box
BnaA02g33480D	chrA02	1640	1686	TATA-box
BnaA02g33480D	chrA02	1641	1688	TATA-box
BnaA02g33480D	chrA02	1642	1688	TATA-box
BnaA02g33480D	chrA02	1643	1689	TATA-box
BnaA02g33480D	chrA02	1644	1688	TATA-box
BnaA02g33480D	chrA02	1658	1706	TATA-box
BnaA02g33480D	chrA02	1949	1997	TATA-box
BnaA02g33480D	chrA02	1952	1997	TATA-box
BnaA02g33480D	chrA02	1953	1997	TATA-box
BnaA02g33480D	chrA02	1864	1910	ARE
BnaA02g33480D	chrA02	926	972	WRE3
BnaA02g33480D	chrA02	176	222	TCT-motif
BnaA02g33480D	chrA02	21	67	ABRE3a
BnaA02g33480D	chrA02	1437	1483	ABRE3a
BnaA02g33480D	chrA02	167	214	AAGAA-motif
BnaA02g33480D	chrA02	1709	1756	AAGAA-motif
BnaA02g33480D	chrA02	1970	2017	AAGAA-motif
BnaA02g33480D	chrA02	1057	1106	ATCT-motif
BnaA02g33480D	chrA02	140	188	AE-box
BnaA02g33480D	chrA02	21	67	ABRE4
BnaA02g33480D	chrA02	1437	1483	ABRE4
BnaA02g33480D	chrA02	21	66	ABRE
BnaA02g33480D	chrA02	1437	1482	ABRE
BnaA02g33480D	chrA02	1393	1442	O2-site
BnaA02g33480D	chrA02	2	51	TCA-element
BnaA02g33480D	chrA02	982	1028	Box 4
BnaA02g33480D	chrA02	1869	1915	Box 4
BnaA02g33480D	chrA02	1873	1919	Box 4
BnaA02g33480D	chrA02	1333	1380	GATA-motif
BnaA02g33480D	chrA02	442	487	STRE
BnaA02g33480D	chrA02	1835	1881	W box
BnaA02g33480D	chrA02	21	67	G-box
BnaA02g33480D	chrA02	1437	1483	G-box
BnaA02g33480D	chrA02	24	73	I-box
BnaA02g33480D	chrA02	1501	1548	P-box
BnaA02g33480D	chrA02	101	147	AT~TATA-box
BnaA02g33480D	chrA02	351	397	AT~TATA-box
BnaA02g33480D	chrA02	696	742	AT~TATA-box
BnaA02g33480D	chrA02	1640	1688	AT~TATA-box
BnaA02g33480D	chrA02	1642	1688	AT~TATA-box
BnaA02g33480D	chrA02	321	369	TATA
BnaA02g33480D	chrA02	719	765	MYB
BnaA02g33480D	chrA02	302	347	CAAT-box
BnaA02g33480D	chrA02	341	385	CAAT-box
BnaA02g33480D	chrA02	411	456	CAAT-box
BnaA02g33480D	chrA02	412	456	CAAT-box
BnaA02g33480D	chrA02	534	579	CAAT-box
BnaA02g33480D	chrA02	709	753	CAAT-box
BnaA02g33480D	chrA02	738	783	CAAT-box
BnaA02g33480D	chrA02	895	940	CAAT-box
BnaA02g33480D	chrA02	932	977	CAAT-box
BnaA02g33480D	chrA02	947	991	CAAT-box
BnaA02g33480D	chrA02	988	1032	CAAT-box
BnaA02g33480D	chrA02	1026	1071	CAAT-box
BnaA02g33480D	chrA02	1091	1136	CAAT-box
BnaA02g33480D	chrA02	1162	1207	CAAT-box
BnaA02g33480D	chrA02	1203	1247	CAAT-box
BnaA02g33480D	chrA02	1221	1265	CAAT-box
BnaA02g33480D	chrA02	1299	1343	CAAT-box
BnaA02g33480D	chrA02	1520	1564	CAAT-box
BnaA02g33480D	chrA02	1557	1602	CAAT-box
BnaA02g33480D	chrA02	1689	1733	CAAT-box
BnaA02g33480D	chrA02	1732	1777	CAAT-box
BnaA02g33480D	chrA02	1795	1840	CAAT-box
BnaA02g33480D	chrA02	1834	1878	CAAT-box
BnaA02g33480D	chrA02	1839	1884	CAAT-box
BnaA02g33480D	chrA02	1840	1884	CAAT-box
BnaA02g33480D	chrA02	1842	1887	CAAT-box
BnaA02g33480D	chrA02	1922	1967	CAAT-box
BnaA03g11080D	chrA03	180	226	Myb
BnaA03g11080D	chrA03	1552	1598	Myb
BnaA03g11080D	chrA03	360	409	TC-rich repeats
BnaA03g11080D	chrA03	1605	1652	AAGAA-motif
BnaA03g11080D	chrA03	1298	1343	ABRE
BnaA03g11080D	chrA03	1930	1975	ABRE
BnaA03g11080D	chrA03	1929	1975	ABRE4
BnaA03g11080D	chrA03	629	675	ARE
BnaA03g11080D	chrA03	711	757	ARE
BnaA03g11080D	chrA03	1505	1551	ARE
BnaA03g11080D	chrA03	1512	1558	ARE
BnaA03g11080D	chrA03	991	1041	F-box
BnaA03g11080D	chrA03	-8	39	TATA-box
BnaA03g11080D	chrA03	-7	39	TATA-box
BnaA03g11080D	chrA03	-6	39	TATA-box
BnaA03g11080D	chrA03	-5	39	TATA-box
BnaA03g11080D	chrA03	217	261	TATA-box
BnaA03g11080D	chrA03	228	272	TATA-box
BnaA03g11080D	chrA03	258	304	TATA-box
BnaA03g11080D	chrA03	259	303	TATA-box
BnaA03g11080D	chrA03	363	411	TATA-box
BnaA03g11080D	chrA03	366	411	TATA-box
BnaA03g11080D	chrA03	367	411	TATA-box
BnaA03g11080D	chrA03	397	443	TATA-box
BnaA03g11080D	chrA03	398	442	TATA-box
BnaA03g11080D	chrA03	687	733	TATA-box
BnaA03g11080D	chrA03	688	735	TATA-box
BnaA03g11080D	chrA03	689	735	TATA-box
BnaA03g11080D	chrA03	690	736	TATA-box
BnaA03g11080D	chrA03	691	735	TATA-box
BnaA03g11080D	chrA03	1021	1067	TATA-box
BnaA03g11080D	chrA03	1023	1069	TATA-box
BnaA03g11080D	chrA03	1024	1070	TATA-box
BnaA03g11080D	chrA03	1025	1069	TATA-box
BnaA03g11080D	chrA03	1031	1077	TATA-box
BnaA03g11080D	chrA03	1032	1077	TATA-box
BnaA03g11080D	chrA03	1033	1077	TATA-box
BnaA03g11080D	chrA03	1239	1286	TATA-box
BnaA03g11080D	chrA03	1240	1286	TATA-box
BnaA03g11080D	chrA03	1241	1286	TATA-box
BnaA03g11080D	chrA03	1242	1286	TATA-box
BnaA03g11080D	chrA03	1291	1339	TATA-box
BnaA03g11080D	chrA03	1543	1587	TATA-box
BnaA03g11080D	chrA03	1614	1658	TATA-box
BnaA03g11080D	chrA03	1681	1725	TATA-box
BnaA03g11080D	chrA03	1696	1742	TATA-box
BnaA03g11080D	chrA03	1697	1744	TATA-box
BnaA03g11080D	chrA03	1698	1744	TATA-box
BnaA03g11080D	chrA03	1700	1744	TATA-box
BnaA03g11080D	chrA03	1782	1826	TATA-box
BnaA03g11080D	chrA03	1860	1904	TATA-box
BnaA03g11080D	chrA03	1964	2012	TATA-box
BnaA03g11080D	chrA03	195	241	MYC
BnaA03g11080D	chrA03	430	476	MYC
BnaA03g11080D	chrA03	881	927	MYC
BnaA03g11080D	chrA03	1715	1761	MYC
BnaA03g11080D	chrA03	180	226	MBS
BnaA03g11080D	chrA03	1929	1975	ABRE3a
BnaA03g11080D	chrA03	184	229	TGACG-motif
BnaA03g11080D	chrA03	953	998	TGACG-motif
BnaA03g11080D	chrA03	1297	1343	G-Box
BnaA03g11080D	chrA03	403	455	A-box
BnaA03g11080D	chrA03	1001	1048	TCCC-motif
BnaA03g11080D	chrA03	1832	1878	WRE3
BnaA03g11080D	chrA03	1295	1343	G-box
BnaA03g11080D	chrA03	1929	1975	G-box
BnaA03g11080D	chrA03	1471	1517	W box
BnaA03g11080D	chrA03	-14	30	CAAT-box
BnaA03g11080D	chrA03	-2	42	CAAT-box
BnaA03g11080D	chrA03	162	206	CAAT-box
BnaA03g11080D	chrA03	195	240	CAAT-box
BnaA03g11080D	chrA03	245	289	CAAT-box
BnaA03g11080D	chrA03	289	333	CAAT-box
BnaA03g11080D	chrA03	395	439	CAAT-box
BnaA03g11080D	chrA03	431	476	CAAT-box
BnaA03g11080D	chrA03	446	491	CAAT-box
BnaA03g11080D	chrA03	447	491	CAAT-box
BnaA03g11080D	chrA03	565	609	CAAT-box
BnaA03g11080D	chrA03	774	818	CAAT-box
BnaA03g11080D	chrA03	780	824	CAAT-box
BnaA03g11080D	chrA03	808	853	CAAT-box
BnaA03g11080D	chrA03	809	853	CAAT-box
BnaA03g11080D	chrA03	834	878	CAAT-box
BnaA03g11080D	chrA03	881	926	CAAT-box
BnaA03g11080D	chrA03	1066	1110	CAAT-box
BnaA03g11080D	chrA03	1223	1268	CAAT-box
BnaA03g11080D	chrA03	1224	1268	CAAT-box
BnaA03g11080D	chrA03	1391	1442	CAAT-box
BnaA03g11080D	chrA03	1401	1445	CAAT-box
BnaA03g11080D	chrA03	1403	1448	CAAT-box
BnaA03g11080D	chrA03	1428	1472	CAAT-box
BnaA03g11080D	chrA03	1441	1485	CAAT-box
BnaA03g11080D	chrA03	1463	1508	CAAT-box
BnaA03g11080D	chrA03	1475	1520	CAAT-box
BnaA03g11080D	chrA03	1476	1520	CAAT-box
BnaA03g11080D	chrA03	1480	1525	CAAT-box
BnaA03g11080D	chrA03	1510	1555	CAAT-box
BnaA03g11080D	chrA03	1530	1574	CAAT-box
BnaA03g11080D	chrA03	1532	1579	CAAT-box
BnaA03g11080D	chrA03	1561	1605	CAAT-box
BnaA03g11080D	chrA03	1643	1687	CAAT-box
BnaA03g11080D	chrA03	1649	1693	CAAT-box
BnaA03g11080D	chrA03	1715	1760	CAAT-box
BnaA03g11080D	chrA03	1786	1831	CAAT-box
BnaA03g11080D	chrA03	1843	1887	CAAT-box
BnaA03g11080D	chrA03	1849	1893	CAAT-box
BnaA03g11080D	chrA03	1873	1917	CAAT-box
BnaA03g11080D	chrA03	1887	1932	CAAT-box
BnaA03g11080D	chrA03	1252	1302	CAG-motif
BnaA03g11080D	chrA03	184	229	as-1
BnaA03g11080D	chrA03	953	998	as-1
BnaA03g11080D	chrA03	69	115	MYB
BnaA03g11080D	chrA03	352	398	MYB
BnaA03g11080D	chrA03	531	577	CAT-box
BnaA03g11080D	chrA03	687	735	AT~TATA-box
BnaA03g11080D	chrA03	689	735	AT~TATA-box
BnaA03g11080D	chrA03	1023	1069	AT~TATA-box
BnaA03g11080D	chrA03	1698	1744	AT~TATA-box
BnaA03g11080D	chrA03	1238	1286	TATA
BnaA03g11080D	chrA03	1286	1333	TATC-box
BnaA03g11080D	chrA03	670	717	GT1-motif
BnaA03g11080D	chrA03	1318	1367	TCA
BnaA03g11080D	chrA03	1795	1844	TCA
BnaA03g11080D	chrA03	21	67	Box 4
BnaA03g11080D	chrA03	1483	1529	Box 4
BnaA03g11080D	chrA03	184	229	CGTCA-motif
BnaA03g11080D	chrA03	953	998	CGTCA-motif
BnaA03g11080D	chrA03	45	94	O2-site
BnaA03g11080D	chrA03	468	517	circadian
BnaA03g12310D	chrA03	304	350	MYB-like sequence
BnaA03g12310D	chrA03	1444	1490	MYB-like sequence
BnaA03g12310D	chrA03	1721	1767	MYB-like sequence
BnaA03g12310D	chrA03	79	128	ACE
BnaA03g12310D	chrA03	230	276	LTR
BnaA03g12310D	chrA03	1517	1563	LTR
BnaA03g12310D	chrA03	1526	1572	LTR
BnaA03g12310D	chrA03	1674	1720	LTR
BnaA03g12310D	chrA03	335	380	CGTCA-motif
BnaA03g12310D	chrA03	466	514	I-box
BnaA03g12310D	chrA03	703	750	P-box
BnaA03g12310D	chrA03	304	350	MYB
BnaA03g12310D	chrA03	1444	1490	MYB
BnaA03g12310D	chrA03	1721	1767	MYB
BnaA03g12310D	chrA03	1956	2002	MYB
BnaA03g12310D	chrA03	-16	28	CAAT-box
BnaA03g12310D	chrA03	569	613	CAAT-box
BnaA03g12310D	chrA03	610	654	CAAT-box
BnaA03g12310D	chrA03	620	664	CAAT-box
BnaA03g12310D	chrA03	661	705	CAAT-box
BnaA03g12310D	chrA03	697	741	CAAT-box
BnaA03g12310D	chrA03	857	902	CAAT-box
BnaA03g12310D	chrA03	872	916	CAAT-box
BnaA03g12310D	chrA03	1089	1134	CAAT-box
BnaA03g12310D	chrA03	1121	1166	CAAT-box
BnaA03g12310D	chrA03	1199	1247	CAAT-box
BnaA03g12310D	chrA03	1201	1246	CAAT-box
BnaA03g12310D	chrA03	1419	1463	CAAT-box
BnaA03g12310D	chrA03	1468	1513	CAAT-box
BnaA03g12310D	chrA03	1484	1528	CAAT-box
BnaA03g12310D	chrA03	1724	1769	CAAT-box
BnaA03g12310D	chrA03	1725	1769	CAAT-box
BnaA03g12310D	chrA03	1866	1913	CAAT-box
BnaA03g12310D	chrA03	1292	1338	CCGTCC motif
BnaA03g12310D	chrA03	809	858	G-box
BnaA03g12310D	chrA03	810	856	G-box
BnaA03g12310D	chrA03	1330	1376	G-box
BnaA03g12310D	chrA03	1622	1668	G-box
BnaA03g12310D	chrA03	1781	1827	G-box
BnaA03g12310D	chrA03	271	317	WRE3
BnaA03g12310D	chrA03	288	334	WRE3
BnaA03g12310D	chrA03	361	407	WRE3
BnaA03g12310D	chrA03	445	491	WRE3
BnaA03g12310D	chrA03	962	1008	WRE3
BnaA03g12310D	chrA03	857	903	MYC
BnaA03g12310D	chrA03	1530	1576	TGA-element
BnaA03g12310D	chrA03	1836	1882	TGA-element
BnaA03g12310D	chrA03	1272	1318	MBS
BnaA03g12310D	chrA03	223	269	TATA-box
BnaA03g12310D	chrA03	225	269	TATA-box
BnaA03g12310D	chrA03	495	539	TATA-box
BnaA03g12310D	chrA03	536	580	TATA-box
BnaA03g12310D	chrA03	552	598	TATA-box
BnaA03g12310D	chrA03	554	598	TATA-box
BnaA03g12310D	chrA03	668	716	TATA-box
BnaA03g12310D	chrA03	925	970	TATA-box
BnaA03g12310D	chrA03	926	970	TATA-box
BnaA03g12310D	chrA03	941	985	TATA-box
BnaA03g12310D	chrA03	1031	1078	TATA-box
BnaA03g12310D	chrA03	1032	1078	TATA-box
BnaA03g12310D	chrA03	1033	1080	TATA-box
BnaA03g12310D	chrA03	1034	1080	TATA-box
BnaA03g12310D	chrA03	1036	1080	TATA-box
BnaA03g12310D	chrA03	1041	1087	TATA-box
BnaA03g12310D	chrA03	1042	1086	TATA-box
[truncated: 23,534 more rows]
