# Supplementary material for: Genome-wide characterization of ubiquitin-conjugating enzyme gene family explores its genetic effects on the oil content and yield of Brassica napus
Source: Front Plant Sci. 2023 Mar 20;14:1118339. doi: 10.3389/fpls.2023.1118339 (PMC10067767; doi:10.3389/fpls.2023.1118339)
Supplement: Supplementary file 11 [file Table_6.xlsx]

## Sheet: Sheet1
Table S6. Type of the UBC gene duplication in B. napus and three other Brassicaceae species. Numbers 0, 1, 2, 3, 4 indicate the dispersed, proximal, transposed, tandem and WGD duplication type, respectively.
Species	Duplicated gene1	Duplicated gene2	Duplicated type
B. napus	BnaC03g43920D	BnaC03g43940D	1
	BnaA05g17550D	BnaA05g17560D	3
	BnaA01g13200D	BnaA04g02190D	2
	BnaA01g32320D	BnaA03g31080D	2
	BnaA06g10330D	BnaA03g31080D	2
	BnaA08g07400D	BnaA01g27470D	2
	BnaA10g03140D	BnaC05g10640D	2
	BnaA10g10530D	BnaC03g25550D	2
	BnaAnng13030D	BnaC08g17090D	2
	BnaAnng28650D	BnaC02g12450D	2
	BnaAnng34240D	BnaC08g28860D	2
	BnaC01g24100D	BnaA04g02190D	2
	BnaC01g32360D	BnaC03g25550D	2
	BnaC02g02910D	BnaC03g25550D	2
	BnaC04g10080D	BnaA02g10330D	2
	BnaC04g21410D	BnaA04g27280D	2
	BnaC04g37650D	BnaA10g10300D	2
	BnaC05g27450D	BnaC06g16140D	2
	BnaC05g49100D	BnaA06g09230D	2
	BnaC05g51200D	BnaA05g15820D	2
	BnaC06g27370D	BnaC03g13840D	2
	BnaC06g41780D	BnaA05g14770D	2
	BnaC06g41980D	BnaA05g14770D	2
	BnaC07g04570D	BnaC06g06060D	2
	BnaC08g12720D	BnaA10g06670D	2
	BnaCnng21490D	BnaA10g10300D	2
	BnaCnng40140D	BnaA07g37890D	2
	BnaCnng46390D	BnaAnng04570D	2
	BnaCnng48400D	BnaA09g04490D	2
	BnaCnng51160D	BnaA03g55110D	2
	BnaCnng51240D	BnaC08g39660D	2
	BnaCnng54670D	BnaC03g01930D	2
	BnaCnng59170D	BnaAnng04570D	2
	BnaA01g32320D	BnaA05g29530D	2
	BnaA01g32320D	BnaC03g36410D	2
	BnaA06g10330D	BnaA05g29530D	2
	BnaA06g10330D	BnaC03g36410D	2
	BnaC04g10080D	BnaA03g12310D	2
	BnaC04g10080D	BnaC02g14410D	2
	BnaC05g27450D	BnaA07g17510D	2
	BnaC05g27450D	BnaC08g28860D	2
	BnaC06g27370D	BnaA03g11080D	2
	BnaC08g12720D	BnaC09g29580D	2
	BnaCnng51160D	BnaC03g01930D	2
	BnaCnng51240D	BnaA08g24010D	2
	BnaCnng51240D	BnaA09g57120D	2
	BnaCnng54670D	BnaA03g55110D	2
	BnaA01g28850D	BnaA05g24190D	4
	BnaA01g25670D	BnaA05g19090D	4
	BnaA01g16780D	BnaA08g13930D	4
	BnaA01g01300D	BnaC01g02310D	4
	BnaA01g25670D	BnaC01g32800D	4
	BnaA01g16780D	BnaC01g20530D	4
	BnaA01g17560D	BnaC01g21910D	4
	BnaA01g28850D	BnaC01g36100D	4
	BnaA01g27470D	BnaC01g44130D	4
	BnaA01g28850D	BnaC03g39070D	4
	BnaA01g28850D	BnaC03g39070D	4
	BnaA01g25670D	BnaC05g32470D	4
	BnaA01g28850D	BnaC05g38230D	4
	BnaA01g01300D	BnaC07g51150D	4
	BnaA02g10330D	BnaA03g12310D	4
	BnaA02g26550D	BnaA06g34030D	4
	BnaA02g19070D	BnaA07g34450D	4
	BnaA02g15070D	BnaA07g10040D	4
	BnaA02g15070D	BnaA08g20580D	4
	BnaA02g26550D	BnaA09g19140D	4
	BnaA02g07130D	BnaA10g12310D	4
	BnaA02g10330D	BnaA10g06670D	4
	BnaA02g33480D	BnaAnng21880D	4
	BnaA02g10330D	BnaC02g14410D	4
	BnaA02g07130D	BnaC02g10070D	4
	BnaA02g26550D	BnaC02g34760D	4
	BnaA02g19070D	BnaC02g25260D	4
	BnaA02g10330D	BnaC03g14940D	4
	BnaA02g26550D	BnaC07g21870D	4
	BnaA02g15070D	BnaC08g06250D	4
	BnaA02g07130D	BnaC09g34500D	4
	BnaA02g10330D	BnaC09g29580D	4
	BnaA03g21240D	BnaA04g26620D	4
	BnaA03g31080D	BnaA05g29530D	4
	BnaA03g33820D	BnaA05g24190D	4
	BnaA03g39290D	BnaA07g03430D	4
	BnaA03g39410D	BnaA07g03330D	4
	BnaA03g12310D	BnaA10g06670D	4
	BnaA03g33820D	BnaC01g36100D	4
	BnaA03g11080D	BnaC02g12440D	4
	BnaA03g12310D	BnaC02g14410D	4
	BnaA03g11080D	BnaC03g13840D	4
	BnaA03g13470D	BnaC03g16350D	4
	BnaA03g15110D	BnaC03g18130D	4
	BnaA03g21240D	BnaC03g25550D	4
	BnaA03g31080D	BnaC03g36410D	4
	BnaA03g33820D	BnaC03g39070D	4
	BnaA03g37430D	BnaC03g43880D	4
	BnaA03g39290D	BnaC03g46610D	4
	BnaA03g39410D	BnaC03g46750D	4
	BnaA03g12310D	BnaC03g14940D	4
	BnaA03g21240D	BnaC04g50680D	4
	BnaA03g31080D	BnaC05g43870D	4
	BnaA03g33820D	BnaC05g38230D	4
	BnaA03g53560D	BnaC07g46220D	4
	BnaA03g39290D	BnaC07g05830D	4
	BnaA03g39410D	BnaC07g05960D	4
	BnaA03g12310D	BnaC09g29580D	4
	BnaA03g55110D	BnaA10g25250D	4
	BnaA03g55110D	BnaC03g01930D	4
	BnaA04g11090D	BnaA07g15340D	4
	BnaA04g02190D	BnaA07g17510D	4
	BnaA04g03650D	BnaA07g37890D	4
	BnaA04g03650D	BnaA09g34960D	4
	BnaA04g05360D	BnaA09g32990D	4
	BnaA04g26620D	BnaC03g25550D	4
	BnaA04g26620D	BnaC04g50680D	4
	BnaA04g03650D	BnaC04g25550D	4
	BnaA04g05360D	BnaC04g28100D	4
	BnaA04g19750D	BnaC04g44130D	4
	BnaA04g02190D	BnaC04g23980D	4
	BnaA04g02190D	BnaC06g16140D	4
	BnaA04g02190D	BnaC08g28860D	4
	BnaA04g05360D	BnaC08g23790D	4
	BnaA04g03650D	BnaC08g26190D	4
	BnaA04g11090D	BnaCnng33990D	4
	BnaA04g27280D	BnaC04g23980D	4
	BnaA05g14770D	BnaA06g01230D	4
	BnaA05g15820D	BnaA06g02780D	4
	BnaA05g19090D	BnaA06g02780D	4
	BnaA05g14750D	BnaA08g01350D	4
	BnaA05g15820D	BnaA08g02120D	4
	BnaA05g24190D	BnaC01g36100D	4
	BnaA05g19090D	BnaC01g32800D	4
	BnaA05g29530D	BnaC03g36410D	4
	BnaA05g24190D	BnaC03g39070D	4
	BnaA05g29530D	BnaC05g43870D	4
	BnaA05g24190D	BnaC05g38230D	4
	BnaA05g19090D	BnaC05g32470D	4
	BnaA05g18620D	BnaC05g25370D	4
	BnaA05g14750D	BnaC06g10370D	4
	BnaA05g13430D	BnaC06g11310D	4
	BnaA05g14770D	BnaC06g06060D	4
	BnaA05g15820D	BnaC06g03670D	4
	BnaA05g37000D	BnaC05g39770D	4
	BnaA06g01230D	BnaA08g01350D	4
	BnaA06g02780D	BnaA08g02120D	4
	BnaA06g11360D	BnaA08g23450D	4
	BnaA06g11590D	BnaA08g23200D	4
	BnaA06g09230D	BnaA08g24010D	4
	BnaA06g27860D	BnaA09g04490D	4
	BnaA06g34030D	BnaA09g19140D	4
	BnaA06g11590D	BnaA09g45050D	4
	BnaA06g34030D	BnaC02g34760D	4
	BnaA06g01230D	BnaC03g69050D	4
	BnaA06g02780D	BnaC03g68670D	4
	BnaA06g09230D	BnaC05g10640D	4
	BnaA06g11360D	BnaC05g12900D	4
	BnaA06g11590D	BnaC05g13430D	4
	BnaA06g01230D	BnaC06g06060D	4
	BnaA06g02780D	BnaC06g03670D	4
	BnaA06g27860D	BnaC07g29090D	4
	BnaA06g34030D	BnaC07g21870D	4
	BnaA06g11360D	BnaC08g17090D	4
	BnaA06g11590D	BnaC08g17300D	4
	BnaA06g09230D	BnaC08g39660D	4
	BnaA06g11360D	BnaC08g38130D	4
	BnaA06g11590D	BnaC08g37880D	4
	BnaA06g34030D	BnaC08g39660D	4
	BnaA07g34450D	BnaA07g38410D	4
	BnaA07g10040D	BnaA08g20580D	4
	BnaA07g10040D	BnaA09g30000D	4
	BnaA07g34450D	BnaC02g25260D	4
	BnaA07g03330D	BnaC03g46750D	4
	BnaA07g03430D	BnaC03g46610D	4
	BnaA07g17510D	BnaC04g23980D	4
	BnaA07g10040D	BnaC05g18550D	4
	BnaA07g34450D	BnaC06g39290D	4
	BnaA07g17510D	BnaC06g16140D	4
	BnaA07g28330D	BnaC06g30850D	4
	BnaA07g34450D	BnaC06g20310D	4
	BnaA07g15340D	BnaC06g42330D	4
	BnaA07g10040D	BnaC07g13160D	4
	BnaA07g03330D	BnaC07g05960D	4
	BnaA07g03430D	BnaC07g05830D	4
	BnaA07g17510D	BnaC08g28860D	4
	BnaA07g34450D	BnaC08g38130D	4
	BnaA07g10040D	BnaC08g06250D	4
	BnaA07g37890D	BnaC04g25550D	4
	BnaA07g38410D	BnaC06g39290D	4
	BnaA07g38410D	BnaC06g20310D	4
	BnaA08g20580D	BnaA09g30000D	4
	BnaA08g23200D	BnaA09g45050D	4
	BnaA08g24010D	BnaA09g57120D	4
	BnaA08g13930D	BnaC01g20530D	4
	BnaA08g09170D	BnaC03g63160D	4
	BnaA08g01350D	BnaC03g69050D	4
	BnaA08g02120D	BnaC03g68670D	4
	BnaA08g20580D	BnaC05g18550D	4
	BnaA08g23200D	BnaC05g13430D	4
	BnaA08g24010D	BnaC05g10640D	4
	BnaA08g02120D	BnaC06g03670D	4
	BnaA08g01350D	BnaC06g06060D	4
	BnaA08g20580D	BnaC07g13160D	4
	BnaA08g23200D	BnaC08g37880D	4
	BnaA08g23450D	BnaC08g38130D	4
	BnaA08g24010D	BnaC08g39660D	4
	BnaA08g23200D	BnaC08g17300D	4
	BnaA08g23450D	BnaC08g17090D	4
	BnaA08g24010D	BnaC08g16110D	4
	BnaA08g20580D	BnaC08g06250D	4
	BnaA09g19140D	BnaC02g34760D	4
	BnaA09g34960D	BnaC04g25550D	4
	BnaA09g32990D	BnaC04g28100D	4
	BnaA09g30000D	BnaC05g18550D	4
	BnaA09g45050D	BnaC05g13430D	4
	BnaA09g04490D	BnaC07g29090D	4
	BnaA09g30000D	BnaC07g13160D	4
	BnaA09g19140D	BnaC07g21870D	4
	BnaA09g45050D	BnaC08g37880D	4
	BnaA09g32990D	BnaC08g23790D	4
	BnaA09g34960D	BnaC08g26190D	4
	BnaA09g30000D	BnaC08g06250D	4
	BnaA09g11510D	BnaC09g11960D	4
	BnaA09g16240D	BnaC09g17320D	4
	BnaA09g12050D	BnaC09g12280D	4
	BnaA09g11510D	BnaC09g12280D	4
	BnaA09g09660D	BnaC09g51120D	4
	BnaA09g57120D	BnaC08g39660D	4
	BnaA10g10300D	BnaC02g12450D	4
	BnaA10g06670D	BnaC02g14410D	4
	BnaA10g12310D	BnaC02g10070D	4
	BnaA10g25250D	BnaC03g01930D	4
	BnaA10g12310D	BnaC09g34500D	4
	BnaA10g06670D	BnaC09g29580D	4
	BnaA10g28230D	BnaC06g01080D	4
	BnaAnng04570D	BnaC05g27600D	4
	BnaAnng09200D	BnaC06g36210D	4
	BnaAnng19750D	BnaC07g51150D	4
	BnaC01g36100D	BnaC03g39070D	4
	BnaC01g36100D	BnaC05g38230D	4
	BnaC01g32800D	BnaC05g32470D	4
	BnaC01g02310D	BnaC07g51150D	4
	BnaC02g12440D	BnaC03g13840D	4
	BnaC02g14410D	BnaC03g14940D	4
	BnaC02g25260D	BnaC06g39290D	4
	BnaC02g34760D	BnaC07g21870D	4
	BnaC02g10070D	BnaC09g34500D	4
	BnaC02g14410D	BnaC09g29580D	4
	BnaC03g25550D	BnaC04g50680D	4
	BnaC03g36410D	BnaC05g43870D	4
	BnaC03g68670D	BnaC06g03670D	4
	BnaC03g46610D	BnaC07g05830D	4
	BnaC03g46750D	BnaC07g05960D	4
	BnaC04g23980D	BnaC06g16140D	4
	BnaC04g23980D	BnaC08g28860D	4
	BnaC04g28100D	BnaC08g23790D	4
	BnaC05g32470D	BnaC06g03670D	4
	BnaC05g13430D	BnaC08g17300D	4
	BnaC05g12900D	BnaC08g17090D	4
	BnaC05g18550D	BnaC08g06250D	4
	BnaC05g10640D	BnaC08g39660D	4
	BnaC05g12900D	BnaC08g38130D	4
	BnaC05g13430D	BnaC08g37880D	4
	BnaC06g20310D	BnaC06g39290D	4
	BnaC06g16140D	BnaC08g28860D	4
	BnaC07g13160D	BnaC08g06250D	4
	BnaC08g16110D	BnaC08g39660D	4
	BnaC08g17090D	BnaC08g38130D	4
	BnaC08g17300D	BnaC08g37880D	4
	BnaC09g11960D	BnaC09g12280D	4
A. thaliana	AT3G12400	AT5G13860	0
	AT3G08690	AT3G08700	3
	AT1G17280	AT1G64230	2
	AT1G36340	AT5G41700	2
	AT2G16740	AT5G41700	2
	AT2G16920	AT3G15355	2
	AT2G32790	AT1G64230	2
	AT2G33770	AT3G15355	2
	AT3G57870	AT2G02760	2
	AT4G27960	AT5G41700	2
	AT5G05080	AT1G63800	2
	AT5G50430	AT1G64230	2
	AT5G50870	AT1G64230	2
	AT5G53300	AT5G41700	2
	AT5G56150	AT5G41700	2
	AT5G62540	AT2G02760	2
	AT1G23260	AT1G70660	4
	AT1G16890	AT1G78870	4
	AT1G63800	AT2G46030	4
	AT1G14400	AT2G02760	4
	AT1G50490	AT3G20060	4
	AT1G53020	AT3G15355	4
	AT1G75440	AT4G36410	4
	AT1G63800	AT5G41340	4
	AT1G64230	AT5G41700	4
	AT1G45050	AT5G42990	4
	AT2G36060	AT3G52560	4
	AT2G18600	AT4G36800	4
	AT3G46460	AT5G59300	4
B. rapa	BraA05g017420.3C	BraA05g017450.3C	1
	BraA05g021700.3C	BraA05g021720.3C	1
	BraA05g021720.3C	BraA05g021730.3C	3
	BraA01g020570.3C	BraA08g029340.3C	2
	BraA01g035590.3C	BraA09g057850.3C	2
	BraA01g040990.3C	BraA03g034200.3C	2
	BraA02g043760.3C	BraA07g034670.3C	2
	BraA03g015790.3C	BraA03g014550.3C	2
	BraA03g017350.3C	BraA08g019230.3C	2
	BraA03g041200.3C	BraA03g013120.3C	2
	BraA03g060230.3C	BraA07g004210.3C	2
	BraA04g000770.3C	BraA04g003040.3C	2
	BraA04g024250.3C	BraA07g004210.3C	2
	BraA05g015890.3C	BraA09g043710.3C	2
	BraA05g020820.3C	BraA09g019580.3C	2
	BraA05g033560.3C	BraA10g014010.3C	2
	BraA06g000010.3C	BraA03g034200.3C	2
	BraA10g003720.3C	BraA06g010570.3C	2
	BraA01g040990.3C	BraA05g037590.3C	2
	BraA03g015790.3C	BraA02g014670.3C	2
	BraA03g015790.3C	BraA08g019230.3C	2
	BraA06g000010.3C	BraA05g037590.3C	2
	BraA01g002010.3C	BraA03g060280.3C	4
	BraA01g002330.3C	BraA03g060010.3C	4
	BraA01g036730.3C	BraA03g036890.3C	4
	BraA01g033200.3C	BraA05g027210.3C	4
	BraA01g036730.3C	BraA05g031760.3C	4
	BraA01g033200.3C	BraA05g019010.3C	4
	BraA01g033200.3C	BraA06g003240.3C	4
	BraA01g036730.3C	BraA06g001610.3C	4
	BraA01g002330.3C	BraA07g039000.3C	4
	BraA01g033200.3C	BraA08g002950.3C	4
	BraA01g002010.3C	BraA08g021270.3C	4
	BraA01g018790.3C	BraA08g019230.3C	4
	BraA01g036730.3C	BraA08g001880.3C	4
	BraA01g002010.3C	BraA09g011490.3C	4
	BraA02g013000.3C	BraA03g013120.3C	4
	BraA02g014670.3C	BraA03g014550.3C	4
	BraA02g035770.3C	BraA06g039660.3C	4
	BraA02g024910.3C	BraA06g012760.3C	4
	BraA02g024910.3C	BraA07g041940.3C	4
	BraA02g019960.3C	BraA07g014230.3C	4
	BraA02g024910.3C	BraA07g026500.3C	4
	BraA02g019960.3C	BraA08g026590.3C	4
	BraA02g035770.3C	BraA08g030240.3C	4
	BraA02g035770.3C	BraA09g023630.3C	4
	BraA02g019960.3C	BraA09g039910.3C	4
	BraA02g035770.3C	BraA09g059400.3C	4
	BraA02g011090.3C	BraA10g017170.3C	4
	BraA02g013000.3C	BraA10g014010.3C	4
	BraA02g014670.3C	BraA10g011660.3C	4
	BraA03g024030.3C	BraA04g031930.3C	4
	BraA03g034200.3C	BraA05g037590.3C	4
	BraA03g036890.3C	BraA05g031760.3C	4
	BraA03g036890.3C	BraA06g001610.3C	4
	BraA03g043320.3C	BraA07g004380.3C	4
	BraA03g043410.3C	BraA07g004210.3C	4
	BraA03g060280.3C	BraA08g021270.3C	4
	BraA03g036890.3C	BraA08g001880.3C	4
	BraA03g060280.3C	BraA09g011490.3C	4
	BraA03g013120.3C	BraA10g014010.3C	4
	BraA03g014550.3C	BraA10g011660.3C	4
	BraA04g013920.3C	BraA07g020500.3C	4
	BraA04g003040.3C	BraA07g023070.3C	4
	BraA04g004670.3C	BraA07g022030.3C	4
	BraA04g003040.3C	BraA09g048460.3C	4
	BraA04g004670.3C	BraA09g046200.3C	4
	BraA04g006810.3C	BraA09g043710.3C	4
	BraA05g017410.3C	BraA06g001610.3C	4
	BraA05g019010.3C	BraA06g003240.3C	4
	BraA05g027210.3C	BraA06g003240.3C	4
	BraA05g031760.3C	BraA06g001610.3C	4
	BraA05g017410.3C	BraA08g001880.3C	4
	BraA05g031760.3C	BraA08g001880.3C	4
	BraA06g010570.3C	BraA06g039660.3C	4
	BraA06g012760.3C	BraA07g026500.3C	4
	BraA06g039660.3C	BraA07g034670.3C	4
	BraA06g012760.3C	BraA07g041940.3C	4
	BraA06g001610.3C	BraA08g001880.3C	4
	BraA06g003240.3C	BraA08g002950.3C	4
	BraA06g010570.3C	BraA08g030240.3C	4
	BraA06g013080.3C	BraA08g029340.3C	4
	BraA06g039660.3C	BraA08g030240.3C	4
	BraA06g032910.3C	BraA09g005810.3C	4
	BraA06g010570.3C	BraA09g059400.3C	4
	BraA06g012760.3C	BraA09g058060.3C	4
	BraA06g013080.3C	BraA09g057850.3C	4
	BraA06g039660.3C	BraA09g023630.3C	4
	BraA06g039660.3C	BraA09g059400.3C	4
	BraA07g026500.3C	BraA07g041940.3C	4
	BraA07g014230.3C	BraA08g026590.3C	4
	BraA07g022030.3C	BraA09g046200.3C	4
	BraA07g023070.3C	BraA09g048460.3C	4
	BraA07g014230.3C	BraA09g039910.3C	4
	BraA07g041940.3C	BraA09g058060.3C	4
	BraA07g026500.3C	BraA09g058060.3C	4
	BraA08g026590.3C	BraA09g039910.3C	4
	BraA08g029340.3C	BraA09g057850.3C	4
	BraA08g030240.3C	BraA09g059400.3C	4
	BraA08g021270.3C	BraA09g011490.3C	4
	BraA08g030240.3C	BraA09g023630.3C	4
	BraA09g023630.3C	BraA09g059400.3C	4
	BraA09g013680.3C	BraA09g014570.3C	4
	BraA09g019580.3C	BraA10g007240.3C	4
B. oleracea	BolC3t17649H	BolC3t17653H	1
	BolC6t36727H	BolC6t36729H	1
	BolC5t32449H	BolC5t32450H	3
	BolC1t02610H	BolC1t04696H	2
	BolC1t03368H	BolC6t37643H	2
	BolC2t09510H	BolC3t14034H	2
	BolC2t12287H	BolC2t11178H	2
	BolC3t14327H	BolC3t14034H	2
	BolC3t14523H	BolC2t07988H	2
	BolC4t24594H	BolC4t25013H	2
	BolC4t26431H	BolC3t15385H	2
	BolC4t27799H	BolC3t18037H	2
	BolC5t32355H	BolC6t35251H	2
	BolC5t34100H	BolC3t18025H	2
	BolC6t36845H	BolC8t50400H	2
	BolC6t39980H	BolC9t55455H	2
	BolC7t46613H	BolC7t41090H	2
	BolC9t53393H	BolC3t14034H	2
	BolC9t54697H	BolC8t48730H	2
	BolC2t12287H	BolC7t43846H	2
	BolC1t05493H	BolC3t16671H	4
	BolC1t04873H	BolC3t21421H	4
	BolC1t04873H	BolC3t17039H	4
	BolC1t04873H	BolC5t33869H	4
	BolC1t04365H	BolC5t33170H	4
	BolC1t04873H	BolC6t35948H	4
	BolC1t04365H	BolC6t35678H	4
	BolC1t00251H	BolC7t46593H	4
	BolC1t02390H	BolC8t48730H	4
	BolC2t07661H	BolC3t14034H	4
	BolC2t07988H	BolC3t14184H	4
	BolC2t11178H	BolC5t29974H	4
	BolC2t08845H	BolC5t30945H	4
	BolC2t09607H	BolC6t40294H	4
	BolC2t11178H	BolC7t43846H	4
	BolC2t08845H	BolC7t42573H	4
	BolC2t11178H	BolC8t49289H	4
	BolC2t08845H	BolC8t49820H	4
	BolC2t07359H	BolC9t58017H	4
	BolC2t07661H	BolC9t57588H	4
	BolC2t07988H	BolC9t57185H	4
	BolC3t17039H	BolC3t21421H	4
	BolC3t15385H	BolC4t28701H	4
	BolC3t21421H	BolC5t33869H	4
	BolC3t17039H	BolC5t33869H	4
	BolC3t21284H	BolC5t32090H	4
	BolC3t21421H	BolC6t35948H	4
	BolC3t21421H	BolC6t36615H	4
	BolC3t21284H	BolC6t35678H	4
	BolC3t17039H	BolC6t35948H	4
	BolC3t18025H	BolC7t41105H	4
	BolC3t18037H	BolC7t41090H	4
	BolC3t14034H	BolC9t57588H	4
	BolC3t12794H	BolC9t59922H	4
	BolC3t14184H	BolC9t57185H	4
	BolC3t20237H	BolC9t54310H	4
	BolC4t25013H	BolC6t37643H	4
	BolC4t25013H	BolC8t50942H	4
	BolC4t25628H	BolC8t50400H	4
	BolC4t25266H	BolC8t50676H	4
	BolC5t33869H	BolC6t35948H	4
	BolC5t30226H	BolC6t38200H	4
	BolC5t30226H	BolC6t40294H	4
	BolC5t32090H	BolC6t35678H	4
	BolC5t33170H	BolC6t35678H	4
	BolC5t30945H	BolC7t42573H	4
	BolC5t29974H	BolC7t43846H	4
	BolC5t29974H	BolC8t49289H	4
	BolC5t30226H	BolC8t49385H	4
	BolC5t30274H	BolC8t49407H	4
	BolC5t30945H	BolC8t49820H	4
	BolC5t29974H	BolC8t52129H	4
	BolC5t30226H	BolC8t51967H	4
	BolC5t30274H	BolC8t51946H	4
	BolC6t35948H	BolC6t36615H	4
	BolC6t38200H	BolC6t40294H	4
	BolC6t37643H	BolC8t50942H	4
	BolC6t37461H	BolC8t50676H	4
	BolC6t35251H	BolC9t55455H	4
	BolC7t43846H	BolC8t52129H	4
	BolC7t42573H	BolC8t49820H	4
	BolC7t43846H	BolC8t49289H	4
	BolC7t44745H	BolC9t53594H	4
	BolC8t49289H	BolC8t52129H	4
	BolC8t49385H	BolC8t51967H	4
	BolC8t49407H	BolC8t51946H	4
