# Supplementary material for: Genome-wide characterization of ubiquitin-conjugating enzyme gene family explores its genetic effects on the oil content and yield of Brassica napus
Source: Front Plant Sci. 2023 Mar 20;14:1118339. doi: 10.3389/fpls.2023.1118339 (PMC10067767; doi:10.3389/fpls.2023.1118339)
Supplement: Supplementary file 12 [file Table_7.xlsx]

## Sheet: Sheet1
Table S7. List of BnUBCs and their orthologs in A. thaliana, B. rapa and B. oleracea.
B. napus	chromosome	A. thaliana	chromosome	B. oleracea	chromosome	B. rapa	chromosome
BnaA01g01300D	chrA01	AT4G36410	Chr4	BraA01g002330.3C	A01	BolC1t00251H	C1
BnaA01g13200D	chrA01	AT3G57870	Chr3	BraA09g048460.3C	A09	BolC1t03368H	C1
BnaA01g16780D	chrA01					BolC1t02390H	C1
BnaA01g17560D	chrA01			BraA01g020570.3C	A01	BolC1t02610H	C1
BnaA01g25670D	chrA01	AT3G20060	Chr3	BraA01g033200.3C	A01	BolC1t04365H	C1
BnaA01g27470D	chrA01	AT3G17000	Chr3	BraA01g035590.3C	A01	BolC1t04696H	C1
BnaA01g28850D	chrA01			BraA01g036730.3C	A01	BolC1t04873H	C1
BnaA01g32320D	chrA01	AT3G08690	Chr3	BraA06g000010.3C	A06	BolC1t05493H	C1
BnaA02g07130D	chrA02	AT5G59300	Chr5	BraA02g011090.3C	A02	BolC9t58017H	C9
BnaA02g10330D	chrA02	AT5G53300	Chr5	BraA02g014670.3C	A02	BolC2t07988H	C2
BnaA02g15070D	chrA02	AT1G70660	Chr1	BraA02g019960.3C	A02	BolC2t08845H	C2
BnaA02g19070D	chrA02			BraA02g024910.3C	A02	BolC5t30226H	C5
BnaA02g26550D	chrA02	AT2G02760	Chr2	BraA06g039660.3C	A06	BolC2t11178H	C2
BnaA02g33480D	chrA02			BraA02g043760.3C	A02	BolC2t12287H	C2
BnaA03g12310D	chrA03	AT5G53300	Chr5	BraA03g014550.3C	A03	BolC2t07988H	C2
BnaA03g13470D	chrA03			BraA03g015790.3C	S1
BnaA03g15110D	chrA03			BraA03g017350.3C	A03	BolC3t14523H	C3
BnaA03g21240D	chrA03			BraA04g031930.3C	A04	BolC3t15385H	C3
BnaA03g31080D	chrA03	AT3G08690	Chr3	BraA03g034200.3C	A03	BolC3t16671H	C3
BnaA03g37430D	chrA03			BraA03g041200.3C	A03	BolC3t17653H	C3
BnaA03g39290D	chrA03	AT2G16740	Chr2	BraA03g043320.3C	A03	BolC3t18025H	C3
BnaA03g53560D	chrA03			BraA03g060230.3C	A03
BnaA03g55110D	chrA03_random			BraA03g001920.3C	A03	BolC3t12794H	C3
BnaA04g02190D	chrA04	AT3G57870	Chr3	BraA04g003040.3C	A04	BolC4t25013H	C4
BnaA04g03650D	chrA04			BraA04g004670.3C	A04
BnaA04g05360D	chrA04	AT2G36060	Chr2	BraA04g006810.3C	A04	BolC6t36845H	C6
BnaA04g11090D	chrA04	AT5G41340	Chr5	BraA04g013920.3C	A04	BolC4t26431H	C4
BnaA04g19750D	chrA04			BraA04g024250.3C	A04	BolC4t27799H	C4
BnaA04g26620D	chrA04			BraA04g031930.3C	A04	BolC4t28701H	C4
BnaA04g27280D	chrA04_random			BraA04g000770.3C	A04	BolC4t24594H	C4
BnaA05g13430D	chrA05	AT2G36060	Chr2	BraA04g006810.3C	A04	BolC6t36845H	C6
BnaA05g14750D	chrA05			BraA05g017420.3C	A05	BolC6t36729H	C6
BnaA05g14770D	chrA05			BraA05g017450.3C	A05	BolC6t36615H	C6
BnaA05g15820D	chrA05	AT1G50490	Chr1	BraA05g019010.3C	A05	BolC5t32090H	C5
BnaA05g17550D	chrA05			BraA05g020350.3C	A05
BnaA05g18620D	chrA05	AT1G45050	Chr1	BraA05g020820.3C	A05	BolC5t32355H	C5
BnaA05g19090D	chrA05	AT3G20060	Chr3	BraA05g027210.3C	A05	BolC5t33170H	C5
BnaA05g24190D	chrA05			BraA05g031760.3C	A05	BolC5t33869H	C5
BnaA05g29530D	chrA05	AT3G08690	Chr3	BraA05g037590.3C	A05	BolC1t05493H	C1
BnaA05g37000D	chrA05_random	AT3G13550	Chr3	BraA05g033560.3C	A05	BolC5t34100H	C5
BnaA06g01230D	chrA06			BraA06g001610.3C	A06	BolC6t35948H	C6
BnaA06g02780D	chrA06	AT1G50490	Chr1	BraA06g003240.3C	A06	BolC6t35678H	C6
BnaA06g09230D	chrA06	AT1G14400	Chr1	BraA06g010570.3C	A06	BolC5t29974H	C5
BnaA06g10330D	chrA06	AT3G08690	Chr3	BraA06g000010.3C	A06	BolC1t05493H	C1
BnaA06g11360D	chrA06	AT1G16890	Chr1	BraA09g058060.3C	A09	BolC5t30226H	C5
BnaA06g11590D	chrA06	AT1G17280	Chr1	BraA06g013080.3C	A06	BolC5t30274H	C5
BnaA06g27860D	chrA06	AT5G25760	Chr5	BraA06g032910.3C	A06	BolC7t44745H	C7
BnaA06g34030D	chrA06	AT2G02760	Chr2	BraA06g039660.3C	A06	BolC7t43846H	C7
BnaA07g03330D	chrA07					BolC7t41090H	C7
BnaA07g03430D	chrA07	AT2G16740	Chr2	BraA07g004380.3C	A07	BolC7t41105H	C7
BnaA07g10040D	chrA07	AT1G23260	Chr1	BraA08g026590.3C	A08	BolC7t42573H	C7
BnaA07g15340D	chrA07	AT5G41340	Chr5	BraA07g020500.3C	A07	BolC4t26431H	C4
BnaA07g17510D	chrA07	AT3G57870	Chr3	BraA07g023070.3C	A07	BolC6t37643H	C6
BnaA07g28330D	chrA07			BraA07g034670.3C	A07
BnaA07g34450D	chrA07	AT1G78870	Chr1	BraA07g041940.3C	A07	BolC2t09607H	C2
BnaA07g37890D	chrA07_random			BraA07g022030.3C	A07
BnaA07g38410D	chrA07_random	AT1G78870	Chr1	BraA07g041940.3C	A07	BolC2t09607H	C2
BnaA08g01350D	chrA08			BraA08g001880.3C	A08	BolC3t21421H	C3
BnaA08g02120D	chrA08	AT1G50490	Chr1	BraA08g002950.3C	A08	BolC3t21284H	C3
BnaA08g07400D	chrA08	AT3G17000	Chr3	BraA01g035590.3C	A01	BolC1t04696H	C1
BnaA08g13930D	chrA08					BolC8t48730H	C8
BnaA08g20580D	chrA08	AT1G23260	Chr1	BraA08g026590.3C	A08	BolC8t49820H	C8
BnaA08g23200D	chrA08	AT1G17280	Chr1	BraA08g029340.3C	A08	BolC8t49407H	C8
BnaA08g23450D	chrA08	AT1G16890	Chr1	BraA09g058060.3C	A09	BolC5t30226H	C5
BnaA08g24010D	chrA08	AT1G14400	Chr1	BraA08g030240.3C	A08	BolC8t52129H	C8
BnaA08g24020D	chrA08	AT1G14400	Chr1	BraA08g030250.3C	A08	BolC8t52129H	C8
BnaA09g04490D	chrA09					BolC9t53594H	C9
BnaA09g09660D	chrA09					BolC9t54310H	C9
BnaA09g11510D	chrA09	AT1G64230	Chr1	BraA09g013680.3C	A09	BolC9t54697H	C9
BnaA09g16240D	chrA09			BraA09g019580.3C	A09	BolC9t55455H	C9
BnaA09g19140D	chrA09	AT2G02760	Chr2	BraA06g039660.3C	A06	BolC2t11178H	C2
BnaA09g30000D	chrA09	AT1G23260	Chr1	BraA09g039910.3C	A09	BolC5t30945H	C5
BnaA09g32990D	chrA09	AT2G36060	Chr2	BraA09g043710.3C	A09	BolC6t36845H	C6
BnaA09g34960D	chrA09			BraA09g046200.3C	A09
BnaA09g45050D	chrA09	AT1G17280	Chr1	BraA09g057850.3C	A09	BolC8t51946H	C8
BnaA09g57120D	chrA09_random	AT1G14400	Chr1	BraA09g059400.3C	A09	BolC8t52129H	C8
BnaA10g03140D	chrA10			BraA10g003720.3C	A10
BnaA10g06670D	chrA10	AT5G53300	Chr5	BraA10g011660.3C	A10	BolC9t57185H	C9
BnaA10g10300D	chrA10	AT5G56150	Chr5	BraA10g014010.3C	A10	BolC9t57588H	C9
BnaA10g10530D	chrA10	AT2G46030	Chr2	BraA03g024030.3C	A03	BolC3t15385H	C3
BnaA10g12310D	chrA10	AT5G59300	Chr5	BraA10g017170.3C	A10	BolC9t58017H	C9
BnaA10g25250D	chrA10	AT5G05080	Chr5	BraA10g028050.3C	A10	BolC3t12794H	C3
BnaA10g28230D	chrA10_random	AT1G45050	Chr1	BraA05g020820.3C	A05	BolC6t35251H	C6
BnaAnng04570D	chrAnn_random			BraA05g021730.3C	A05
BnaAnng09200D	chrAnn_random	AT1G75440	Chr1	BraA07g039000.3C	A07	BolC6t39980H	C6
BnaAnng13030D	chrAnn_random	AT1G16890	Chr1	BraA09g058060.3C	A09	BolC5t30226H	C5
BnaAnng19750D	chrAnn_random	AT4G36410	Chr4	BraA03g060010.3C	A03	BolC7t46593H	C7
BnaAnng21880D	chrAnn_random			BraA02g043760.3C	A02	BolC2t12287H	C2
BnaAnng28650D	chrAnn_random	AT5G56150	Chr5	BraA02g013000.3C	A02	BolC2t07662H	C2
BnaAnng34240D	chrAnn_random	AT3G57870	Chr3	BraA09g048460.3C	A09	BolC8t50942H	C8
BnaC01g02310D	chrC01	AT4G36410	Chr4	BraA01g002330.3C	A01	BolC1t00251H	C1
BnaC01g20530D	chrC01					BolC1t02390H	C1
BnaC01g21910D	chrC01			BraA01g020570.3C	A01	BolC1t02610H	C1
BnaC01g24100D	chrC01	AT3G57870	Chr3	BraA09g048460.3C	A09	BolC1t03368H	C1
BnaC01g32360D	chrC01	AT2G46030	Chr2	BraA03g024030.3C	A03	BolC3t15385H	C3
BnaC01g32800D	chrC01	AT3G20060	Chr3	BraA01g033200.3C	A01	BolC1t04365H	C1
BnaC01g39370D	chrC01					BolC1t05493H	C1
BnaC01g44130D	chrC01_random	AT3G17000	Chr3	BraA01g035590.3C	A01	BolC1t04696H	C1
BnaC02g02910D	chrC02	AT2G46030	Chr2	BraA03g024030.3C	A03	BolC3t15385H	C3
BnaC02g10070D	chrC02	AT5G59300	Chr5	BraA02g011090.3C	A02	BolC9t58017H	C9
BnaC02g12440D	chrC02					BolC2t07661H	C2
BnaC02g12450D	chrC02	AT5G56150	Chr5	BraA02g013000.3C	A02	BolC2t07662H	C2
BnaC02g14410D	chrC02	AT5G53300	Chr5	BraA02g014670.3C	A02	BolC2t07988H	C2
BnaC02g25260D	chrC02	AT1G78870	Chr1	BraA02g024910.3C	A02	BolC2t09607H	C2
BnaC02g34760D	chrC02	AT2G02760	Chr2	BraA06g039660.3C	A06	BolC2t11178H	C2
BnaC03g01930D	chrC03			BraA03g001920.3C	A03	BolC3t12794H	C3
BnaC03g13840D	chrC03	AT5G56150	Chr5	BraA03g013120.3C	A03	BolC2t07662H	C2
BnaC03g14940D	chrC03					BolC3t14184H	C3
BnaC03g16350D	chrC03			BraA03g015790.3C	A03
BnaC03g18130D	chrC03			BraA03g017350.3C	A03	BolC3t14523H	C3
BnaC03g25550D	chrC03	AT2G46030	Chr2	BraA04g031930.3C	A04	BolC3t15385H	C3
BnaC03g25560D	chrC03			BraA03g024030.3C	A03
BnaC03g36410D	chrC03	AT3G08690	Chr3	BraA03g034200.3C	A03	BolC3t16671H	C3
BnaC03g43880D	chrC03			BraA03g041200.3C	A03	BolC3t17653H	C3
BnaC03g43940D	chrC03			BraA03g041200.3C	A03	BolC3t17653H	C3
BnaC03g46610D	chrC03	AT2G16740	Chr2	BraA03g043320.3C	A03	BolC3t18025H	C3
BnaC03g63160D	chrC03					BolC3t20467H	C3
BnaC03g69050D	chrC03			BraA08g001880.3C	A08	BolC3t21421H	C3
BnaC04g21410D	chrC04			BraA04g000770.3C	A04	BolC4t24594H	C4
BnaC04g23980D	chrC04	AT3G57870	Chr3	BraA04g003040.3C	A04	BolC4t25013H	C4
BnaC04g25550D	chrC04			BraA04g004670.3C	A04	BolC9t58017H	C9
BnaC04g28100D	chrC04	AT2G36060	Chr2	BraA04g006810.3C	A04	BolC6t36845H	C6
BnaC04g37650D	chrC04	AT5G56150	Chr5	BraA10g014010.3C	A10	BolC9t57588H	C9
BnaC04g50680D	chrC04			BraA04g031930.3C	A04	BolC4t28701H	C4
BnaC05g10640D	chrC05	AT1G14400	Chr1	BraA06g010570.3C	A06	BolC5t29974H	C5
BnaC05g12900D	chrC05	AT1G16890	Chr1	BraA09g058060.3C	A09	BolC5t30226H	C5
BnaC05g13430D	chrC05	AT1G17280	Chr1	BraA06g013080.3C	A06	BolC5t30274H	C5
BnaC05g18550D	chrC05	AT1G23260	Chr1	BraA08g026590.3C	A08	BolC5t30945H	C5
BnaC05g25370D	chrC05	AT1G45050	Chr1	BraA05g020820.3C	A05	BolC5t32355H	C5
BnaC05g27600D	chrC05			BraA05g020350.3C	A05
BnaC05g27620D	chrC05					BolC5t32450H	C5
BnaC05g32470D	chrC05	AT3G20060	Chr3	BraA05g027210.3C	A05	BolC5t33170H	C5
BnaC05g38230D	chrC05			BraA05g031760.3C	A05	BolC5t33869H	C5
BnaC05g39770D	chrC05	AT3G13550	Chr3	BraA05g033560.3C	A05	BolC5t34100H	C5
BnaC05g43870D	chrC05	AT3G08690	Chr3	BraA05g037590.3C	A05	BolC1t05493H	C1
BnaC05g49100D	chrC05_random			BraA10g003720.3C	A10
BnaC05g51200D	chrC05_random	AT1G50490	Chr1	BraA05g019010.3C	A05	BolC5t32090H	C5
BnaC06g01080D	chrC06	AT1G45050	Chr1	BraA05g020820.3C	A05	BolC6t35251H	C6
BnaC06g03670D	chrC06	AT1G50490	Chr1	BraA06g003240.3C	A06	BolC6t35678H	C6
BnaC06g06060D	chrC06			BraA06g001610.3C	A06	BolC6t35948H	C6
BnaC06g10370D	chrC06			BraA05g017420.3C	A05	BolC6t36729H	C6
BnaC06g11310D	chrC06	AT2G36060	Chr2	BraA04g006810.3C	A04	BolC6t36845H	C6
BnaC06g16140D	chrC06	AT3G57870	Chr3	BraA07g023070.3C	A07	BolC6t37643H	C6
BnaC06g20310D	chrC06					BolC6t38200H	C6
BnaC06g27370D	chrC06					BolC9t53393H	C9
BnaC06g30850D	chrC06			BraA07g034670.3C	A07
BnaC06g36210D	chrC06	AT1G75440	Chr1	BraA07g039000.3C	A07	BolC6t39980H	C6
BnaC06g39290D	chrC06	AT1G78870	Chr1	BraA07g041940.3C	A07	BolC2t09607H	C2
BnaC06g41780D	chrC06_random			BraA05g017450.3C	A05	BolC6t36615H	C6
BnaC06g41980D	chrC06_random			BraA05g017410.3C	A05	BolC6t36727H	C6
BnaC06g42330D	chrC06_random	AT5G41340	Chr5	BraA07g020500.3C	A07	BolC4t26431H	C4
BnaC07g05830D	chrC07	AT2G16740	Chr2	BraA07g004380.3C	A07	BolC7t41105H	C7
BnaC07g13160D	chrC07	AT1G23260	Chr1	BraA08g026590.3C	A08	BolC7t42573H	C7
BnaC07g29090D	chrC07	AT5G25760	Chr5	BraA06g032910.3C	A06	BolC7t44745H	C7
BnaC07g46220D	chrC07					BolC7t46613H	C7
BnaC07g51150D	chrC07_random	AT4G36410	Chr4	BraA03g060010.3C	A03	BolC7t46593H	C7
BnaC08g06250D	chrC08	AT1G23260	Chr1	BraA08g026590.3C	A08	BolC8t49820H	C8
BnaC08g12720D	chrC08	AT4G27960	Chr4	BraA08g019230.3C	A08	BolC8t48730H	C8
BnaC08g17090D	chrC08	AT1G78870	Chr1	BraA09g058060.3C	A09	BolC5t30226H	C5
BnaC08g17300D	chrC08	AT1G17280	Chr1	BraA08g029340.3C	A08	BolC8t49407H	C8
BnaC08g23790D	chrC08	AT2G36060	Chr2	BraA09g043710.3C	A09	BolC6t36845H	C6
BnaC08g26190D	chrC08			BraA09g046200.3C	A09
BnaC08g28860D	chrC08	AT3G57870	Chr3	BraA09g048460.3C	A09	BolC8t50942H	C8
BnaC08g37880D	chrC08	AT1G17280	Chr1	BraA09g057850.3C	A09	BolC8t51946H	C8
BnaC08g38130D	chrC08	AT1G16890	Chr1	BraA09g058060.3C	A09	BolC8t51967H	C8
BnaC08g39660D	chrC08	AT1G14400	Chr1	BraA09g059400.3C	A09	BolC8t52129H	C8
BnaC09g11960D	chrC09	AT1G64230	Chr1	BraA09g013680.3C	A09	BolC9t54697H	C9
BnaC09g12280D	chrC09	AT1G64230	Chr1	BraA09g014570.3C	A09	BolC9t54697H	C9
BnaC09g29580D	chrC09	AT5G53300	Chr5	BraA10g011660.3C	A10	BolC9t57185H	C9
BnaC09g34500D	chrC09	AT5G59300	Chr5	BraA10g017170.3C	A10	BolC9t58017H	C9
BnaC09g51120D	chrC09_random					BolC9t54310H	C9
BnaCnng21490D	chrCnn_random	AT5G56150	Chr5	BraA10g014010.3C	A10	BolC9t57588H	C9
BnaCnng33990D	chrCnn_random	AT5G41340	Chr5	BraA04g013920.3C	A04	BolC4t26431H	C4
BnaCnng40140D	chrCnn_random			BraA07g022030.3C	A07
BnaCnng46390D	chrCnn_random			BraA05g021730.3C	A05
BnaCnng48400D	chrCnn_random	AT5G25760	Chr5	BraA09g005810.3C	A09	BolC9t53594H	C9
BnaCnng51160D	chrCnn_random	AT5G05080	Chr5	BraA10g028050.3C	A10	BolC3t12794H	C3
BnaCnng51240D	chrCnn_random	AT1G14400	Chr1	BraA08g030240.3C	A08	BolC8t52129H	C8
BnaCnng54670D	chrCnn_random	AT5G05080	Chr5	BraA10g028050.3C	A10	BolC9t59922H	C9
BnaCnng59170D	chrCnn_random					BolC5t32288H	C5
