# Supplementary material for: Genome-wide characterization of ubiquitin-conjugating enzyme gene family explores its genetic effects on the oil content and yield of Brassica napus
Source: Front Plant Sci. 2023 Mar 20;14:1118339. doi: 10.3389/fpls.2023.1118339 (PMC10067767; doi:10.3389/fpls.2023.1118339)
Supplement: Supplementary file 13 [file Table_8.xlsx]

## Sheet: Sheet1
Table S8. Calculation of the Ka/Ks ratio and divergence time of paralogous UBC gene pairs in B. napus.
Paralogous gene pairs		Ka	Ks	Ka/Ks	Time (MYA)	Purify selection
BnaA01g01300D	BnaC01g02310D	0.00528274	0.0822093	0.0642596	2.74031	yes
BnaA01g01300D	BnaC07g51150D	0.0285808	0.271556	0.105248	9.05187	yes		Time= Ks/2x where X is 1.5×10−8
BnaA01g13200D	BnaA04g02190D	0.0869726	0.450526	0.193047	15.0175	yes
BnaA01g16780D	BnaA08g13930D	0.0475772	0.455472	0.104457	15.1824	yes
BnaA01g16780D	BnaC01g20530D	0.00341965	0.0920186	0.0371627	3.06729	yes
BnaA01g17560D	BnaC01g21910D	0.00578957	0.0649982	0.0890727	2.16661	yes
BnaA01g25670D	BnaA05g19090D	0.0210295	0.211333	0.099509	7.04443	yes
BnaA01g25670D	BnaC01g32800D	0.0100863	0.0731571	0.137871	2.43857	yes
BnaA01g25670D	BnaC05g32470D	0.0228719	0.259907	0.0880003	8.66357	yes
BnaA01g27470D	BnaC01g44130D	0.0202444	0.182839	0.110723	6.09463	yes
BnaA01g28850D	BnaA05g24190D	0.143852	0.491199	0.292859	16.3733	yes
BnaA01g28850D	BnaC01g36100D	0.0198691	0.11955	0.166199	3.985	yes
BnaA01g28850D	BnaC03g39070D	0.121356	0.463745	0.261688	15.4582	yes
BnaA01g28850D	BnaC05g38230D	0.135293	0.477981	0.28305	15.9327	yes
BnaA01g32320D	BnaA03g31080D	0.00287725	0.300675	0.00956931	10.0225	yes
BnaA01g32320D	BnaA05g29530D	0.00289337	0.413655	0.00699463	13.7885	yes
BnaA01g32320D	BnaC03g36410D	0.00283222	0.390201	0.00725835	13.0067	yes
BnaA02g07130D	BnaA10g12310D	0.07433	0.562547	0.132131	18.7516	yes
BnaA02g07130D	BnaC02g10070D	0.0102169	0.173159	0.0590028	5.77197	yes
BnaA02g07130D	BnaC09g34500D	0.09383	0.537733	0.174492	17.9244	yes
BnaA02g10330D	BnaA03g12310D	0.000176841	0.176841	0.001	5.8947	yes
BnaA02g10330D	BnaA10g06670D	0.00279165	0.269852	0.0103451	8.99507	yes
BnaA02g10330D	BnaC02g14410D	5.50751e-05	0.0550751	0.001	1.83584	yes
BnaA02g10330D	BnaC03g14940D	0.000201744	0.201744	0.001	6.7248	yes
BnaA02g10330D	BnaC09g29580D	0.0029032	0.237957	0.0122005	7.9319	yes
BnaA02g15070D	BnaA07g10040D	0.0976062	0.895122	0.109042	29.8374	yes
BnaA02g15070D	BnaA08g20580D	0.0882466	0.979105	0.0901298	32.6368	yes
BnaA02g15070D	BnaC08g06250D	0.0973542	0.913003	0.106631	30.4334	yes
BnaA02g19070D	BnaA07g34450D	0.00291475	0.260109	0.0112059	8.6703	yes
BnaA02g19070D	BnaC02g25260D	0.000106886	0.106886	0.001	3.56287	yes
BnaA02g26550D	BnaA06g34030D	0.000407456	0.407456	0.001	13.5819	yes
BnaA02g26550D	BnaA09g19140D	0.000264515	0.264515	0.001	8.81717	yes
BnaA02g26550D	BnaC02g34760D	0.000114047	0.114047	0.001	3.80157	yes
BnaA02g26550D	BnaC07g21870D	0.0119574	0.345856	0.0345735	11.5285	yes
BnaA02g33480D	BnaAnng21880D	5.60002e-05	0.0560002	0.001	1.86667	yes
BnaA03g11080D	BnaC02g12440D	0.221279	0.447459	0.494524	14.9153	yes
BnaA03g11080D	BnaC03g13840D	0.0141183	0.122204	0.115531	4.07347	yes
BnaA03g12310D	BnaA10g06670D	0.00284527	0.306608	0.00927983	10.2203	yes
BnaA03g12310D	BnaC02g14410D	0.000207585	0.207585	0.001	6.9195	yes
BnaA03g12310D	BnaC03g14940D	8.45013e-05	0.0845013	0.001	2.81671	yes
BnaA03g12310D	BnaC09g29580D	0.002864	0.259341	0.0110434	8.6447	yes
BnaA03g13470D	BnaC03g16350D	0.00291855	0.0350727	0.0832143	1.16909	yes
BnaA03g15110D	BnaC03g18130D	0.0146314	0.0431767	0.338873	1.43922	yes
BnaA03g21240D	BnaA04g26620D	0.021224	0.354249	0.0599127	11.8083	yes
BnaA03g21240D	BnaC03g25550D	0.00454908	0.0727374	0.0625411	2.42458	yes
BnaA03g21240D	BnaC04g50680D	0.0280876	0.350892	0.0800463	11.6964	yes
BnaA03g31080D	BnaA05g29530D	0.000259948	0.259948	0.001	8.66493	yes
BnaA03g31080D	BnaC03g36410D	0.000139403	0.139403	0.001	4.64677	yes
BnaA03g31080D	BnaC05g43870D	0.00308976	0.240375	0.0128539	8.0125	yes
BnaA03g33820D	BnaA05g24190D	0.251493	0.668512	0.376198	22.2837	yes
BnaA03g33820D	BnaC01g36100D	0.14126	0.491875	0.287188	16.3958	yes
BnaA03g33820D	BnaC03g39070D	0.0503871	0.151655	0.332249	5.05517	yes
BnaA03g33820D	BnaC05g38230D	0.238203	0.711076	0.334989	23.7025	yes
BnaA03g37430D	BnaC03g43880D	0.166751	0.215395	0.774167	7.17983	yes
BnaA03g39290D	BnaA07g03430D	0.0671971	0.344307	0.195166	11.4769	yes
BnaA03g39290D	BnaC03g46610D	0.02165	0.0928217	0.233243	3.09406	yes
BnaA03g39290D	BnaC07g05830D	0.0704287	0.346895	0.203026	11.5632	yes
BnaA03g39410D	BnaA07g03330D	0.130846	0.548859	0.238397	18.2953	yes
BnaA03g39410D	BnaC03g46750D	0.0152339	0.104277	0.14609	3.4759	yes
BnaA03g39410D	BnaC07g05960D	0.123069	0.566582	0.217212	18.8861	yes
BnaA03g53560D	BnaC07g46220D	0.290881	0.654624	0.444348	21.8208	yes
BnaA03g55110D	BnaA10g25250D	0.033928	0.23396	0.145016	7.79867	yes
BnaA03g55110D	BnaC03g01930D	0.0072558	0.0411235	0.176439	1.37078	yes
BnaA04g02190D	BnaA07g17510D	0.00268731	0.269627	0.00996677	8.98757	yes
BnaA04g02190D	BnaC04g23980D	0.00262289	0.16078	0.0163136	5.35933	yes
BnaA04g02190D	BnaC06g16140D	0.00263459	0.216613	0.0121627	7.22043	yes
BnaA04g02190D	BnaC08g28860D	0.0109702	0.243373	0.0450758	8.11243	yes
BnaA04g03650D	BnaA07g37890D	0.0216607	0.376768	0.0574907	12.5589	yes
BnaA04g03650D	BnaA09g34960D	0.0475041	0.473951	0.10023	15.7984	yes
BnaA04g03650D	BnaC04g25550D	0.00235556	0.192973	0.0122067	6.43243	yes
BnaA04g03650D	BnaC08g26190D	0.0557595	0.458638	0.121576	15.2879	yes
BnaA04g05360D	BnaA09g32990D	0.0294996	0.283573	0.104028	9.45243	yes
BnaA04g05360D	BnaC04g28100D	0.00298896	0.0358732	0.08332	1.19577	yes
BnaA04g05360D	BnaC08g23790D	0.0290764	0.318878	0.0911836	10.6293	yes
BnaA04g11090D	BnaA07g15340D	0.00920827	0.168424	0.0546733	5.61413	yes
BnaA04g11090D	BnaCnng33990D	0.00485955	0.104745	0.0463941	3.4915	yes
BnaA04g19750D	BnaC04g44130D	0.0184402	0.116049	0.1589	3.8683	yes
BnaA04g26620D	BnaC03g25550D	0.016905	0.336038	0.0503067	11.2013	yes
BnaA04g26620D	BnaC04g50680D	0.0109421	0.115757	0.0945263	3.85857	yes
BnaA05g13430D	BnaC06g11310D	0.00344482	0.0194292	0.177301	0.64764	yes
BnaA05g14750D	BnaA08g01350D	0.156654	0.498674	0.31414	16.6225	yes
BnaA05g14750D	BnaC06g10370D	0.1222	0.231314	0.528288	7.71047	yes
BnaA05g14770D	BnaA06g01230D	0.139321	0.507127	0.274725	16.9042	yes
BnaA05g14770D	BnaC06g06060D	0.137732	0.450573	0.305681	15.0191	yes
BnaA05g15820D	BnaA06g02780D	0.0173726	0.321193	0.0540876	10.7064	yes
BnaA05g15820D	BnaA08g02120D	0.0613643	0.204543	0.300006	6.8181	yes
BnaA05g15820D	BnaC06g03670D	0.0172552	0.344056	0.0501522	11.4685	yes
BnaA05g17550D	BnaA05g17560D	0.0799199	0.177671	0.44982	5.92237	yes
BnaA05g18620D	BnaC05g25370D	0.0035212	0.0122064	0.28847	0.40688	yes
BnaA05g19090D	BnaA06g02780D	0.039872	0.705242	0.0565367	23.5081	yes
BnaA05g19090D	BnaC01g32800D	0.0244889	0.214091	0.114386	7.13637	yes
BnaA05g19090D	BnaC05g32470D	0.00705916	0.0764203	0.0923728	2.54734	yes
BnaA05g24190D	BnaC01g36100D	0.14479	0.480867	0.301101	16.0289	yes
BnaA05g24190D	BnaC03g39070D	0.220664	0.752983	0.293053	25.0994	yes
BnaA05g24190D	BnaC05g38230D	0.0197217	0.0738931	0.266894	2.4631	yes
BnaA05g29530D	BnaC03g36410D	0.000324367	0.324367	0.001	10.8122	yes
BnaA05g29530D	BnaC05g43870D	0.00342869	0.0784778	0.04369	2.61593	yes
BnaA05g37000D	BnaC05g39770D	0.0128403	0.148608	0.0864034	4.9536	yes
BnaA06g01230D	BnaA08g01350D	0.208113	0.64857	0.32088	21.619	yes
BnaA06g01230D	BnaC03g69050D	0.211038	0.629683	0.33515	20.9894	yes
BnaA06g01230D	BnaC06g06060D	0.0377453	0.184703	0.204357	6.15677	yes
BnaA06g02780D	BnaA08g02120D	0.0544811	0.182303	0.29885	6.07677	yes
BnaA06g02780D	BnaC03g68670D	0.266135	0.334001	0.796808	11.1334	yes
BnaA06g02780D	BnaC06g03670D	0.00250574	0.105286	0.0237994	3.50953	yes
BnaA06g09230D	BnaA08g24010D	0.00883003	0.2799	0.0315471	9.33	yes
BnaA06g09230D	BnaC05g10640D	0.00606828	0.0585444	0.103653	1.95148	yes
BnaA06g09230D	BnaC08g39660D	0.00849583	0.295408	0.0287597	9.84693	yes
BnaA06g10330D	BnaA03g31080D	0.00302463	0.231828	0.0130469	7.7276	yes
BnaA06g10330D	BnaA05g29530D	0.00338747	0.250409	0.0135277	8.34697	yes
BnaA06g10330D	BnaC03g36410D	0.00304294	0.228921	0.0132926	7.6307	yes
BnaA06g11360D	BnaA08g23450D	0.00613036	0.30958	0.0198022	10.3193	yes
BnaA06g11360D	BnaC05g12900D	0.00300853	0.104146	0.0288877	3.47153	yes
BnaA06g11360D	BnaC08g17090D	0.00309642	0.405605	0.00763406	13.5202	yes
BnaA06g11360D	BnaC08g38130D	0.000266487	0.266487	0.001	8.8829	yes
BnaA06g11590D	BnaA08g23200D	0.0348252	0.377464	0.0922609	12.5821	yes
BnaA06g11590D	BnaA09g45050D	0.0302757	0.34128	0.0887123	11.376	yes
BnaA06g11590D	BnaC05g13430D	0.00204198	0.0492331	0.0414757	1.6411	yes
BnaA06g11590D	BnaC08g17300D	0.0388775	0.368017	0.10564	12.2672	yes
BnaA06g11590D	BnaC08g37880D	0.0253951	0.289179	0.0878178	9.6393	yes
BnaA06g27860D	BnaA09g04490D	0.0114792	0.37362	0.0307242	12.454	yes
BnaA06g27860D	BnaC07g29090D	0.000144039	0.144039	0.001	4.8013	yes
BnaA06g34030D	BnaA09g19140D	0.000534746	0.534746	0.001	17.8249	yes
BnaA06g34030D	BnaC02g34760D	0.000476886	0.476886	0.001	15.8962	yes
BnaA06g34030D	BnaC07g21870D	0.0117407	0.242664	0.0483826	8.0888	yes
BnaA06g34030D	BnaC08g39660D	0.00557069	0.793445	0.00702089	26.4482	yes
BnaA07g03330D	BnaC03g46750D	0.0880229	0.420841	0.209159	14.028	yes
BnaA07g03330D	BnaC07g05960D	0.0202436	0.0730879	0.276976	2.43626	yes
BnaA07g03430D	BnaC03g46610D	0.0649789	0.348183	0.186623	11.6061	yes
BnaA07g03430D	BnaC07g05830D	0.00301394	6.02789e-05	50	0.0020093	no
BnaA07g10040D	BnaA08g20580D	0.0134295	0.425825	0.0315376	14.1942	yes
BnaA07g10040D	BnaA09g30000D	0.0139248	0.456973	0.0304718	15.2324	yes
BnaA07g10040D	BnaC05g18550D	0.0137038	0.487978	0.0280828	16.2659	yes
BnaA07g10040D	BnaC07g13160D	0.0110842	0.0613704	0.180612	2.04568	yes
BnaA07g10040D	BnaC08g06250D	0.0250244	0.426549	0.0586672	14.2183	yes
BnaA07g15340D	BnaC06g42330D	0.00284986	0.0150059	0.189916	0.500197	yes
BnaA07g17510D	BnaC04g23980D	0.00569791	0.270817	0.0210397	9.02723	yes
BnaA07g17510D	BnaC06g16140D	0.000101748	0.101748	0.001	3.3916	yes
BnaA07g17510D	BnaC08g28860D	0.00823657	0.283005	0.029104	9.4335	yes
BnaA07g28330D	BnaC06g30850D	8.35952e-05	0.0835952	0.001	2.78651	yes
BnaA07g34450D	BnaA07g38410D	0.0114449	0.290574	0.0393873	9.6858	yes
BnaA07g34450D	BnaC02g25260D	0.00281089	0.25273	0.0111221	8.42433	yes
BnaA07g34450D	BnaC06g20310D	0.0113086	0.270308	0.0418362	9.01027	yes
BnaA07g34450D	BnaC06g39290D	0.00294175	0.0573864	0.0512621	1.91288	yes
BnaA07g34450D	BnaC08g38130D	0.0059201	0.73091	0.00809963	24.3637	yes
BnaA07g37890D	BnaC04g25550D	0.0235069	0.408035	0.05761	13.6012	yes
BnaA07g38410D	BnaC06g20310D	0.00827337	0.201351	0.0410894	6.7117	yes
BnaA07g38410D	BnaC06g39290D	0.00862166	0.266606	0.0323386	8.88687	yes
BnaA08g01350D	BnaC03g69050D	0.0113711	0.0740116	0.15364	2.46705	yes
BnaA08g01350D	BnaC06g06060D	0.151837	0.497313	0.305314	16.5771	yes
BnaA08g02120D	BnaC03g68670D	0.235775	0.294157	0.801526	9.80523	yes
BnaA08g02120D	BnaC06g03670D	0.0537572	0.289625	0.18561	9.65417	yes
BnaA08g07400D	BnaA01g27470D	0.014253	0.144998	0.0982975	4.83327	yes
BnaA08g09170D	BnaC03g63160D	0.0812416	0.132815	0.611692	4.42717	yes
BnaA08g13930D	BnaC01g20530D	0.0490078	0.426745	0.114841	14.2248	yes
BnaA08g20580D	BnaA09g30000D	0.0118784	0.462892	0.0256613	15.4297	yes
BnaA08g20580D	BnaC05g18550D	0.0116392	0.441439	0.0263665	14.7146	yes
BnaA08g20580D	BnaC07g13160D	0.00814122	0.37711	0.0215885	12.5703	yes
BnaA08g20580D	BnaC08g06250D	0.011814	0.201309	0.0586857	6.7103	yes
BnaA08g23200D	BnaA09g45050D	0.0451959	0.367982	0.122821	12.2661	yes
BnaA08g23200D	BnaC05g13430D	0.0322728	0.383131	0.0842343	12.771	yes
BnaA08g23200D	BnaC08g17300D	0.0113416	0.0697061	0.162706	2.32354	yes
BnaA08g23200D	BnaC08g37880D	0.0416789	0.340714	0.122328	11.3571	yes
BnaA08g23450D	BnaC08g17090D	0.00842882	0.170545	0.0494228	5.68483	yes
BnaA08g23450D	BnaC08g38130D	0.00573595	0.267874	0.0214129	8.92913	yes
BnaA08g24010D	BnaA09g57120D	0.00026464	0.26464	0.001	8.82133	yes
BnaA08g24010D	BnaC05g10640D	0.0145884	0.250389	0.0582629	8.3463	yes
BnaA08g24010D	BnaC08g16110D	0.0671041	0.204119	0.328751	6.80397	yes
BnaA08g24010D	BnaC08g39660D	0.000310768	0.310768	0.001	10.3589	yes
BnaA09g04490D	BnaC07g29090D	0.0113087	0.35417	0.0319302	11.8057	yes
BnaA09g09660D	BnaC09g51120D	0.0936601	0.182338	0.513661	6.07793	yes
BnaA09g11510D	BnaC09g11960D	7.00474e-05	0.0700474	0.001	2.33491	yes
BnaA09g11510D	BnaC09g12280D	0.0658531	0.311293	0.211547	10.3764	yes
BnaA09g12050D	BnaC09g12280D	0.0221606	0.0692646	0.319942	2.30882	yes
BnaA09g16240D	BnaC09g17320D	0.0126577	0.0929808	0.136133	3.09936	yes
BnaA09g19140D	BnaC02g34760D	0.000367507	0.367507	0.001	12.2502	yes
BnaA09g19140D	BnaC07g21870D	0.0117979	0.485781	0.0242865	16.1927	yes
BnaA09g30000D	BnaC05g18550D	8.96595e-05	0.0896595	0.001	2.98865	yes
BnaA09g30000D	BnaC07g13160D	0.00834245	0.486872	0.0171348	16.2291	yes
BnaA09g30000D	BnaC08g06250D	0.0240619	0.462613	0.0520129	15.4204	yes
BnaA09g32990D	BnaC04g28100D	0.0332293	0.238604	0.139265	7.95347	yes
BnaA09g32990D	BnaC08g23790D	4.24587e-05	0.0424587	0.001	1.41529	yes
BnaA09g34960D	BnaC04g25550D	0.0489497	0.472631	0.103569	15.7544	yes
BnaA09g34960D	BnaC08g26190D	0.00784598	0.0598861	0.131015	1.9962	yes
BnaA09g45050D	BnaC05g13430D	0.0281983	0.333732	0.0844939	11.1244	yes
BnaA09g45050D	BnaC08g37880D	0.0148683	0.0553186	0.268775	1.84395	yes
BnaA09g57120D	BnaC08g39660D	0.000130706	0.130706	0.001	4.35687	yes
BnaA10g03140D	BnaC05g10640D	0.430732	0.522578	0.824245	17.4193	yes
BnaA10g06670D	BnaC02g14410D	0.00245361	0.271214	0.00904674	9.04047	yes
BnaA10g06670D	BnaC09g29580D	4.31618e-05	0.0431618	0.001	1.43873	yes
BnaA10g10300D	BnaC02g12450D	0.0481862	0.312109	0.154389	10.4036	yes
BnaA10g10530D	BnaC03g25550D	0.0122252	0.02982	0.409968	0.994	yes
BnaA10g12310D	BnaC02g10070D	0.0740496	0.583904	0.126818	19.4635	yes
BnaA10g12310D	BnaC09g34500D	0.049941	0.256903	0.194396	8.56343	yes
BnaA10g25250D	BnaC03g01930D	0.081501	0.317994	0.256297	10.5998	yes
BnaA10g28230D	BnaC06g01080D	0.00933498	0.0629351	0.148327	2.09784	yes
BnaAnng04570D	BnaC05g27600D	0.00435068	0.121596	0.0357799	4.0532	yes
BnaAnng09200D	BnaC06g36210D	0.00779551	0.142912	0.0545475	4.76373	yes
BnaAnng13030D	BnaC08g17090D	0.000349035	0.349035	0.001	11.6345	yes
BnaAnng19750D	BnaC07g51150D	0.0133062	0.113975	0.116747	3.79917	yes
BnaAnng28650D	BnaC02g12450D	0.00642128	0.128918	0.0498091	4.29727	yes
BnaAnng34240D	BnaC08g28860D	0.0110476	0.0789864	0.139867	2.63288	yes
BnaC01g02310D	BnaC07g51150D	0.0299705	0.286332	0.10467	9.5444	yes
BnaC01g24100D	BnaA04g02190D	0.0869726	0.450526	0.193047	15.0175	yes
BnaC01g32360D	BnaC03g25550D	0.00554114	0.0237309	0.233499	0.79103	yes
BnaC01g32800D	BnaC05g32470D	0.0265656	0.269413	0.0986056	8.98043	yes
BnaC01g36100D	BnaC03g39070D	0.12878	0.486738	0.264578	16.2246	yes
BnaC01g36100D	BnaC05g38230D	0.130831	0.461726	0.283352	15.3909	yes
BnaC02g02910D	BnaC03g25550D	0.0173599	0.0169412	1.02472	0.564707	no
BnaC02g10070D	BnaC09g34500D	0.0957044	0.617658	0.154947	20.5886	yes
BnaC02g12440D	BnaC03g13840D	0.215654	0.458352	0.470499	15.2784	yes
BnaC02g14410D	BnaC03g14940D	0.000197623	0.197623	0.001	6.58743	yes
BnaC02g14410D	BnaC09g29580D	0.00251101	0.234745	0.0106968	7.82483	yes
BnaC02g25260D	BnaC06g39290D	0.00564784	0.214546	0.0263246	7.15153	yes
BnaC02g34760D	BnaC07g21870D	0.0118137	0.338918	0.034857	11.2973	yes
BnaC03g25550D	BnaC04g50680D	0.0234993	0.337461	0.0696355	11.2487	yes
BnaC03g36410D	BnaC05g43870D	0.0029235	0.326456	0.00895527	10.8819	yes
BnaC03g43920D	BnaC03g43940D	0.122779	0.250183	0.490757	8.33943	yes
BnaC03g46610D	BnaC07g05830D	0.0681608	0.350382	0.194533	11.6794	yes
BnaC03g46750D	BnaC07g05960D	0.0897999	0.415149	0.216307	13.8383	yes
BnaC03g68670D	BnaC06g03670D	0.264353	0.438052	0.603476	14.6017	yes
BnaC04g10080D	BnaA02g10330D	0.00725435	0.0402391	0.180281	1.3413	yes
BnaC04g10080D	BnaA03g12310D	0.00670986	0.200957	0.0333895	6.69857	yes
BnaC04g10080D	BnaC02g14410D	0.00725435	0.0402391	0.180281	1.3413	yes
BnaC04g21410D	BnaA04g27280D	0.00268009	0.0733645	0.0365311	2.44548	yes
BnaC04g23980D	BnaC06g16140D	0.00547452	0.210154	0.02605	7.00513	yes
BnaC04g23980D	BnaC08g28860D	0.0137331	0.257154	0.0534042	8.5718	yes
BnaC04g28100D	BnaC08g23790D	0.0328584	0.273515	0.120134	9.11717	yes
BnaC04g37650D	BnaA10g10300D	0.00821352	0.0515374	0.15937	1.71791	yes
BnaC05g10640D	BnaC08g39660D	0.0139199	0.286131	0.0486488	9.5377	yes
BnaC05g12900D	BnaC08g17090D	0.00572788	0.40958	0.0139848	13.6527	yes
BnaC05g12900D	BnaC08g38130D	0.00282072	0.280272	0.0100642	9.3424	yes
BnaC05g13430D	BnaC08g17300D	0.0361449	0.372821	0.0969497	12.4274	yes
BnaC05g13430D	BnaC08g37880D	0.0229869	0.292952	0.0784664	9.76507	yes
BnaC05g18550D	BnaC08g06250D	0.0238417	0.42817	0.0556829	14.2723	yes
BnaC05g27450D	BnaC06g16140D	0.34518	0.912007	0.378484	30.4002	yes
BnaC05g27450D	BnaC08g28860D	0.362371	0.980771	0.369476	32.6924	yes
BnaC05g32470D	BnaC06g03670D	0.039143	0.828736	0.0472322	27.6245	yes
BnaC05g49100D	BnaA06g09230D	0.203129	0.474095	0.428456	15.8032	yes
BnaC05g51200D	BnaA05g15820D	0.00494142	0.0699365	0.0706559	2.33122	yes
BnaC06g16140D	BnaC08g28860D	0.00847011	0.209948	0.0403439	6.99827	yes
BnaC06g20310D	BnaC06g39290D	0.00855529	0.242314	0.0353066	8.07713	yes
BnaC06g27370D	BnaA03g11080D	0.135905	0.42969	0.316286	14.323	yes
BnaC06g27370D	BnaC03g13840D	0.135767	0.383342	0.354168	12.7781	yes
BnaC06g41780D	BnaA05g14770D	0.0176554	0.070517	0.250371	2.35057	yes
BnaC06g41980D	BnaA05g14770D	0.0966235	0.203834	0.474031	6.79447	yes
BnaC07g04570D	BnaC06g06060D	0.15547	0.47815	0.32515	15.9383	yes
BnaC07g13160D	BnaC08g06250D	0.0198086	0.419786	0.0471875	13.9929	yes
BnaC08g12720D	BnaA10g06670D	0.0124187	0.913186	0.0135993	30.4395	yes
BnaC08g12720D	BnaC09g29580D	0.0124744	0.825207	0.0151167	27.5069	yes
BnaC08g16110D	BnaC08g39660D	0.0701374	0.305452	0.229618	10.1817	yes
BnaC08g17090D	BnaC08g38130D	0.00294322	0.306996	0.00958717	10.2332	yes
BnaC08g17300D	BnaC08g37880D	0.0445039	0.320548	0.138837	10.6849	yes
BnaC09g11960D	BnaC09g12280D	0.0640371	0.371002	0.172606	12.3667	yes
BnaCnng21490D	BnaA10g10300D	0.00536631	0.0800664	0.0670232	2.66888	yes
BnaCnng40140D	BnaA07g37890D	3.07678e-05	0.0307678	0.001	1.02559	yes
BnaCnng46390D	BnaAnng04570D	0.0900192	0.355024	0.253558	11.8341	yes
BnaCnng48400D	BnaA09g04490D	0.12503	0.210067	0.595191	7.00223	yes
BnaCnng51160D	BnaA03g55110D	0.145221	0.444098	0.327003	14.8033	yes
BnaCnng51160D	BnaC03g01930D	0.127152	0.377463	0.336859	12.5821	yes
BnaCnng51240D	BnaA08g24010D	0.000142014	0.142014	0.001	4.7338	yes
BnaCnng51240D	BnaA09g57120D	0.000269724	0.269724	0.001	8.9908	yes
BnaCnng51240D	BnaC08g39660D	0.000279444	0.279444	0.001	9.3148	yes
BnaCnng54670D	BnaA03g55110D	0.0984032	0.376719	0.261211	12.5573	yes
BnaCnng54670D	BnaC03g01930D	0.0923714	0.327126	0.282373	10.9042	yes
