# Supplementary material for: Genome-wide characterization of ubiquitin-conjugating enzyme gene family explores its genetic effects on the oil content and yield of Brassica napus
Source: Front Plant Sci. 2023 Mar 20;14:1118339. doi: 10.3389/fpls.2023.1118339 (PMC10067767; doi:10.3389/fpls.2023.1118339)
Supplement: Supplementary file 14 [file Table_9.xlsx]

## Sheet: Sheet1
Table S9. Ka/Ks ratio and divergence time of the orthologous UBC gene pairs between B. napus and other 3 species (B. rapa, B. oleracea as well as A. thaliana).
Orthologous gene pairs		Ka	Ks	Ka/Ks	Time (MYA)	Purify selection
BnaA01g01300D	AT4G36410	0.01974	0.412234	0.0478854	13.7411	yes		Time= Ks/2x where X is 1.5×10−8
BnaA01g13200D	AT3G57870	0.114634	0.541477	0.211706	18.0492	yes
BnaA01g27470D	AT3G17000	0.0784881	0.50034	0.156869	16.678	yes
BnaA02g07130D	AT5G59300	0.0306939	0.605972	0.0506523	20.1991	yes
BnaA02g26550D	AT2G02760	0.000465788	0.465788	0.001	15.5263	yes
BnaA03g39290D	AT2G16740	0.0854594	0.359899	0.237454	11.9966	yes
BnaA04g02190D	AT3G57870	0.0213126	0.548295	0.0388707	18.2765	yes
BnaA04g11090D	AT5G41340	0.0184263	0.456064	0.0404028	15.2021	yes
BnaA05g15820D	AT1G50490	0.026227	0.446242	0.058773	14.8747	yes
BnaA05g18620D	AT1G45050	0.0271275	0.482812	0.0561864	16.0937	yes
BnaA06g02780D	AT1G50490	0.025351	0.47837	0.0529946	15.9457	yes
BnaA06g34030D	AT2G02760	0.000632798	0.632798	0.001	21.0933	yes
BnaA07g03430D	AT2G16740	0.0469963	0.392678	0.119682	13.0893	yes
BnaA07g10040D	AT1G23260	0.0136171	0.499593	0.0272563	16.6531	yes
BnaA07g15340D	AT5G41340	0.0262931	0.435945	0.0603128	14.5315	yes
BnaA07g17510D	AT3G57870	0.0244171	0.49311	0.0495165	16.437	yes
BnaA08g02120D	AT1G50490	0.0714125	0.290988	0.245414	9.6996	yes
BnaA08g07400D	AT3G17000	0.0315185	0.589651	0.0534529	19.655	yes
BnaA08g20580D	AT1G23260	0.0113118	0.459708	0.0246064	15.3236	yes
BnaA09g19140D	AT2G02760	0.00041484	0.41484	0.001	13.828	yes
BnaA09g30000D	AT1G23260	0.0113254	0.446858	0.0253444	14.8953	yes
BnaA10g28230D	AT1G45050	0.0421529	0.432448	0.0974751	14.4149	yes
BnaAnng09200D	AT1G75440	0.0238292	0.46317	0.051448	15.439	yes
BnaAnng19750D	AT4G36410	0.0362877	0.459647	0.078947	15.3216	yes
BnaAnng34240D	AT3G57870	0.0357074	0.418519	0.0853186	13.9506	yes
BnaC01g02310D	AT4G36410	0.0200634	0.448491	0.0447354	14.9497	yes
BnaC01g24100D	AT3G57870	0.114634	0.541477	0.211706	18.0492	yes
BnaC01g44130D	AT3G17000	0.0783199	0.496289	0.157811	16.543	yes
BnaC02g10070D	AT5G59300	0.0313067	0.546797	0.0572548	18.2266	yes
BnaC02g34760D	AT2G02760	0.000474401	0.474401	0.001	15.8134	yes
BnaC03g25550D	AT2G46030	0.0223425	0.911772	0.0245045	30.3924	yes
BnaC03g46610D	AT2G16740	0.0844667	0.401984	0.210124	13.3995	yes
BnaC04g23980D	AT3G57870	0.0244159	0.496891	0.0491375	16.563	yes
BnaC05g18550D	AT1G23260	0.0087987	0.400283	0.0219812	13.3428	yes
BnaC05g25370D	AT1G45050	0.0237136	0.489202	0.0484741	16.3067	yes
BnaC05g51200D	AT1G50490	0.0265811	0.433239	0.0613542	14.4413	yes
BnaC06g01080D	AT1G45050	0.0392237	0.492965	0.079567	16.4322	yes
BnaC06g03670D	AT1G50490	0.0208104	0.476924	0.0436347	15.8975	yes
BnaC06g16140D	AT3G57870	0.0242193	0.41477	0.0583922	13.8257	yes
BnaC06g36210D	AT1G75440	0.0240135	0.41572	0.0577636	13.8573	yes
BnaC06g42330D	AT5G41340	0.0293742	0.468052	0.0627584	15.6017	yes
BnaC07g05830D	AT2G16740	0.0432113	0.394049	0.10966	13.135	yes
BnaC07g13160D	AT1G23260	0.00843241	0.547725	0.0153953	18.2575	yes
BnaC07g51150D	AT4G36410	0.0388521	0.390248	0.0995573	13.0083	yes
BnaC08g06250D	AT1G23260	0.0236613	0.396093	0.0597368	13.2031	yes
BnaC08g28860D	AT3G57870	0.0330651	0.403332	0.0819798	13.4444	yes
BnaCnng33990D	AT5G41340	0.0222078	0.413365	0.0537246	13.7788	yes
BnaA01g13200D	BraA09g048460.3C	0.0915927	0.314394	0.291331	10.4798	yes
BnaA01g17560D	BraA01g020570.3C	2.70603e-05	0.0270603	0.001	0.90201	yes
BnaA01g25670D	BraA01g033200.3C	0.00520435	0.0162261	0.320739	0.54087	yes
BnaA01g27470D	BraA01g035590.3C	0.00135463	0.0501095	0.0270334	1.67032	yes
BnaA01g28850D	BraA01g036730.3C	0.00398206	0.0333406	0.119436	1.11135	yes
BnaA01g32320D	BraA06g000010.3C	9.8429e-05	0.098429	0.001	3.28097	yes
BnaA02g07130D	BraA02g011090.3C	2.29589e-05	0.0229589	0.001	0.765297	yes
BnaA02g15070D	BraA02g019960.3C	1.62027e-05	0.0162027	0.001	0.54009	yes
BnaA02g19070D	BraA02g024910.3C	6.65609e-05	0.0665609	0.001	2.2187	yes
BnaA02g26550D	BraA06g039660.3C	0.000344935	0.344935	0.001	11.4978	yes
BnaA02g33480D	BraA02g043760.3C	4.56252e-05	0.0456252	0.001	1.52084	yes
BnaA03g12310D	BraA03g014550.3C	1.97772e-05	0.0197772	0.001	0.65924	yes
BnaA03g13470D	BraA03g015790.3C	4.82746e-05	0.0482746	0.001	1.60915	yes
BnaA03g21240D	BraA04g031930.3C	0.0208066	0.349158	0.0595908	11.6386	yes
BnaA03g31080D	BraA03g034200.3C	7.19546e-05	0.0719546	0.001	2.39849	yes
BnaA03g37430D	BraA03g041200.3C	0.0290816	0.0537895	0.540657	1.79298	yes
BnaA03g53560D	BraA03g060230.3C	0.083388	0.188192	0.4431	6.27307	yes
BnaA03g55110D	BraA03g001920.3C	0.00427249	0.00876958	0.487194	0.292319	yes
BnaA04g02190D	BraA04g003040.3C	0.000137968	0.137968	0.001	4.59893	yes
BnaA04g11090D	BraA04g013920.3C	8.60272e-06	0.00860272	0.001	0.286757	yes
BnaA04g19750D	BraA04g024250.3C	0.0110742	0.0898598	0.123238	2.99533	yes
BnaA04g26620D	BraA04g031930.3C	1.38001e-05	0.0138001	0.001	0.460003	yes
BnaA05g13430D	BraA04g006810.3C	0.0332024	0.201561	0.164726	6.7187	yes
BnaA05g14750D	BraA05g017420.3C	0.0447886	0.0556558	0.804743	1.85519	yes
BnaA05g14770D	BraA05g017450.3C	0.000959149	1.9183e-05	50	0.000639433	no
BnaA05g19090D	BraA05g027210.3C	0.00472942	0.0587662	0.0804785	1.95887	yes
BnaA05g24190D	BraA05g031760.3C	0.00708499	0.0320947	0.220753	1.06982	yes
BnaA05g29530D	BraA05g037590.3C	2.61023e-05	0.0261023	0.001	0.870077	yes
BnaA05g37000D	BraA05g033560.3C	0.00588218	0.175567	0.033504	5.85223	yes
BnaA06g01230D	BraA06g001610.3C	0.0289254	0.0742121	0.389767	2.47374	yes
BnaA06g02780D	BraA06g003240.3C	0.00273804	0.0918446	0.0298117	3.06149	yes
BnaA06g09230D	BraA06g010570.3C	3.59265e-05	0.0359265	0.001	1.19755	yes
BnaA06g10330D	BraA06g000010.3C	0.000141973	0.141973	0.001	4.73243	yes
BnaA06g11360D	BraA09g058060.3C	0.00287922	0.347896	0.00827609	11.5965	yes
BnaA06g11590D	BraA06g013080.3C	0.023365	0.0590469	0.395702	1.96823	yes
BnaA06g27860D	BraA06g032910.3C	6.31269e-05	0.0631269	0.001	2.10423	yes
BnaA06g34030D	BraA06g039660.3C	5.73988e-05	0.0573988	0.001	1.91329	yes
BnaA07g03430D	BraA07g004380.3C	0.0198328	0.0119924	1.65379	0.399747	no
BnaA07g10040D	BraA08g026590.3C	0.0134705	0.47458	0.028384	15.8193	yes
BnaA07g28330D	BraA07g034670.3C	1.37477e-05	0.0137477	0.001	0.458257	yes
BnaA07g34450D	BraA07g041940.3C	2.79103e-05	0.0279103	0.001	0.930343	yes
BnaA07g37890D	BraA07g022030.3C	8.27488e-05	0.0827488	0.001	2.75829	yes
BnaA07g38410D	BraA07g041940.3C	0.0116406	0.282399	0.0412203	9.4133	yes
BnaA08g01350D	BraA08g001880.3C	0.00935946	0.064898	0.144218	2.16327	yes
BnaA08g02120D	BraA08g002950.3C	0.0121329	0.00727905	1.66683	0.242635	no
BnaA08g07400D	BraA01g035590.3C	0.0140721	0.202118	0.0696233	6.73727	yes
BnaA08g20580D	BraA08g026590.3C	5.00761e-05	0.0500761	0.001	1.6692	yes
BnaA08g23200D	BraA08g029340.3C	1.32019e-05	0.0132019	0.001	0.440063	yes
BnaA08g23450D	BraA09g058060.3C	0.00871378	0.318699	0.0273417	10.6233	yes
BnaA08g24010D	BraA08g030240.3C	0.000168991	0.168991	0.001	5.63303	yes
BnaA08g24020D	BraA08g030250.3C	0.0204532	0.00933467	2.1911	0.311156	no
BnaA09g11510D	BraA09g013680.3C	2.17488e-05	0.0217488	0.001	0.72496	yes
BnaA09g16240D	BraA09g019580.3C	1.41104e-05	0.0141104	0.001	0.470347	yes
BnaA09g19140D	BraA06g039660.3C	0.0004666	0.4666	0.001	15.5533	yes
BnaA09g30000D	BraA09g039910.3C	0.020407	0.076207	0.267784	2.54023	yes
BnaA09g32990D	BraA09g043710.3C	8.97304e-05	0.0897304	0.001	2.99101	yes
BnaA09g34960D	BraA09g046200.3C	8.29925e-06	0.00829925	0.001	0.276642	yes
BnaA09g45050D	BraA09g057850.3C	1.483e-05	0.01483	0.001	0.494333	yes
BnaA09g57120D	BraA09g059400.3C	2.98315e-05	0.0298315	0.001	0.994383	yes
BnaA10g03140D	BraA10g003720.3C	0.0026557	5.31176e-05	49.9966	0.00177059	no
BnaA10g06670D	BraA10g011660.3C	1.95916e-05	0.0195916	0.001	0.653053	yes
BnaA10g10300D	BraA10g014010.3C	0.00320707	6.41414e-05	50	0.00213805	no
BnaA10g10530D	BraA03g024030.3C	0.0181028	0.153975	0.117569	5.1325	yes
BnaA10g12310D	BraA10g017170.3C	0.0419955	0.194653	0.215746	6.48843	yes
BnaA10g25250D	BraA10g028050.3C	0.00530667	0.000106133	50	0.00353777	no
BnaA10g28230D	BraA05g020820.3C	0.0296443	0.266849	0.11109	8.89497	yes
BnaAnng09200D	BraA07g039000.3C	0.00282773	5.65546e-05	50	0.00188515	no
BnaAnng13030D	BraA09g058060.3C	8.39739e-05	0.0839739	0.001	2.79913	yes
BnaAnng19750D	BraA03g060010.3C	0.00648535	0.0237106	0.273521	0.790353	yes
BnaAnng21880D	BraA02g043760.3C	2.6704e-05	0.026704	0.001	0.890133	yes
BnaAnng28650D	BraA02g013000.3C	0.00871446	0.0109682	0.794518	0.365607	yes
BnaAnng34240D	BraA09g048460.3C	0.00525192	0.020186	0.260176	0.672867	yes
BnaC01g02310D	BraA01g002330.3C	0.00528274	0.0822093	0.0642596	2.74031	yes
BnaC01g21910D	BraA01g020570.3C	0.00579864	0.0716883	0.0808869	2.38961	yes
BnaC01g24100D	BraA09g048460.3C	0.0915927	0.314394	0.291331	10.4798	yes
BnaC01g32360D	BraA03g024030.3C	0.00994165	0.106441	0.0934009	3.54803	yes
BnaC01g32800D	BraA01g033200.3C	0.0102996	0.0878545	0.117235	2.92848	yes
BnaC01g44130D	BraA01g035590.3C	0.0193719	0.1932	0.100269	6.44	yes
BnaC02g02910D	BraA03g024030.3C	0.0206607	0.0968262	0.213379	3.22754	yes
BnaC02g10070D	BraA02g011090.3C	0.0102241	0.142989	0.0715025	4.7663	yes
BnaC02g12450D	BraA02g013000.3C	0.00945022	0.144877	0.0652294	4.82923	yes
BnaC02g14410D	BraA02g014670.3C	5.50751e-05	0.0550751	0.001	1.83584	yes
BnaC02g25260D	BraA02g024910.3C	0.000131423	0.131423	0.001	4.38077	yes
BnaC02g34760D	BraA06g039660.3C	0.000369179	0.369179	0.001	12.306	yes
BnaC03g01930D	BraA03g001920.3C	0.0111128	0.0412442	0.269438	1.37481	yes
BnaC03g13840D	BraA03g013120.3C	0.00396897	0.139746	0.0284013	4.6582	yes
BnaC03g16350D	BraA03g015790.3C	0.00219636	0.0449447	0.0488682	1.49816	yes
BnaC03g18130D	BraA03g017350.3C	0.0146314	0.0431767	0.338873	1.43922	yes
BnaC03g25550D	BraA04g031930.3C	0.0167139	0.344133	0.0485683	11.4711	yes
BnaC03g25560D	BraA03g024030.3C	0.0962004	0.297974	0.322848	9.93247	yes
BnaC03g36410D	BraA03g034200.3C	0.000177115	0.177115	0.001	5.90383	yes
BnaC03g43880D	BraA03g041200.3C	0.174501	0.225868	0.772577	7.52893	yes
BnaC03g43940D	BraA03g041200.3C	0.0396607	0.0866726	0.457592	2.88909	yes
BnaC03g46610D	BraA03g043320.3C	0.02165	0.0928217	0.233243	3.09406	yes
BnaC03g69050D	BraA08g001880.3C	0.0101919	0.0670378	0.152032	2.23459	yes
BnaC04g21410D	BraA04g000770.3C	0.00268009	0.0733645	0.0365311	2.44548	yes
BnaC04g23980D	BraA04g003040.3C	0.00267597	0.243288	0.0109992	8.1096	yes
BnaC04g25550D	BraA04g004670.3C	0.00235556	0.192973	0.0122067	6.43243	yes
BnaC04g28100D	BraA04g006810.3C	0.00298896	0.0358732	0.08332	1.19577	yes
BnaC04g37650D	BraA10g014010.3C	0.0117248	0.0449305	0.260953	1.49768	yes
BnaC04g50680D	BraA04g031930.3C	0.0111949	0.130106	0.0860448	4.33687	yes
BnaC05g10640D	BraA06g010570.3C	0.00638193	0.0770861	0.0827896	2.56954	yes
BnaC05g12900D	BraA09g058060.3C	0.00560852	0.334948	0.0167445	11.1649	yes
BnaC05g13430D	BraA06g013080.3C	0.0253513	0.106425	0.238207	3.5475	yes
BnaC05g18550D	BraA08g026590.3C	0.0120213	0.44864	0.026795	14.9547	yes
BnaC05g25370D	BraA05g020820.3C	0.00372181	0.0126273	0.294744	0.42091	yes
BnaC05g27600D	BraA05g020350.3C	0.0141877	0.0621476	0.228291	2.07159	yes
BnaC05g32470D	BraA05g027210.3C	0.00736247	0.0932854	0.0789241	3.10951	yes
BnaC05g38230D	BraA05g031760.3C	0.0222358	0.0679031	0.327464	2.26344	yes
BnaC05g39770D	BraA05g033560.3C	0.00808928	0.175165	0.0461808	5.83883	yes
BnaC05g43870D	BraA05g037590.3C	0.00366659	0.1075	0.0341077	3.58333	yes
BnaC05g49100D	BraA10g003720.3C	0.167435	0.224363	0.746267	7.47877	yes
BnaC05g51200D	BraA05g019010.3C	0.00494142	0.0699365	0.0706559	2.33122	yes
BnaC06g01080D	BraA05g020820.3C	0.0294213	0.262535	0.112066	8.75117	yes
BnaC06g03670D	BraA06g003240.3C	0.000125387	0.125387	0.001	4.17957	yes
BnaC06g06060D	BraA06g001610.3C	0.00972303	0.119058	0.081666	3.9686	yes
BnaC06g10370D	BraA05g017420.3C	0.0713022	0.149797	0.475992	4.99323	yes
BnaC06g11310D	BraA04g006810.3C	0.0351949	0.182814	0.192518	6.0938	yes
BnaC06g16140D	BraA07g023070.3C	0.000101748	0.101748	0.001	3.3916	yes
BnaC06g30850D	BraA07g034670.3C	0.000102163	0.102163	0.001	3.40543	yes
BnaC06g36210D	BraA07g039000.3C	0.0104927	0.139544	0.0751927	4.65147	yes
BnaC06g39290D	BraA07g041940.3C	0.00309099	0.0460652	0.0671002	1.53551	yes
BnaC06g41780D	BraA05g017450.3C	0.0166108	0.0699995	0.237298	2.33332	yes
BnaC06g41980D	BraA05g017410.3C	0.00825649	0.032737	0.252206	1.09123	yes
BnaC06g42330D	BraA07g020500.3C	0.00312963	0.0164062	0.19076	0.546873	yes
BnaC07g05830D	BraA07g004380.3C	0.0230562	0.0112189	2.05512	0.373963	no
BnaC07g13160D	BraA08g026590.3C	0.00826673	0.426972	0.0193613	14.2324	yes
BnaC07g29090D	BraA06g032910.3C	0.000120798	0.120798	0.001	4.0266	yes
BnaC07g51150D	BraA03g060010.3C	0.0170802	0.149541	0.114217	4.9847	yes
BnaC08g06250D	BraA08g026590.3C	0.0112806	0.187008	0.0603213	6.2336	yes
BnaC08g12720D	BraA08g019230.3C	0.00301476	0.149492	0.0201666	4.98307	yes
BnaC08g17090D	BraA09g058060.3C	0.000390251	0.390251	0.001	13.0084	yes
BnaC08g17300D	BraA08g029340.3C	0.0116075	0.0683142	0.169913	2.27714	yes
BnaC08g23790D	BraA09g043710.3C	9.38479e-05	0.0938479	0.001	3.12826	yes
BnaC08g26190D	BraA09g046200.3C	0.00786854	0.0481639	0.16337	1.60546	yes
BnaC08g28860D	BraA09g048460.3C	0.00555174	0.102954	0.0539243	3.4318	yes
BnaC08g37880D	BraA09g057850.3C	0.0148426	0.0700405	0.211914	2.33468	yes
BnaC08g38130D	BraA09g058060.3C	0.00270136	0.0755412	0.0357601	2.51804	yes
BnaC08g39660D	BraA09g059400.3C	0.00011863	0.11863	0.001	3.95433	yes
BnaC09g11960D	BraA09g013680.3C	4.97469e-05	0.0497469	0.001	1.65823	yes
BnaC09g12280D	BraA09g014570.3C	0.0461286	0.119816	0.384995	3.99387	yes
BnaC09g29580D	BraA10g011660.3C	2.20478e-05	0.0220478	0.001	0.734927	yes
BnaC09g34500D	BraA10g017170.3C	0.0826369	0.217308	0.380275	7.2436	yes
BnaCnng21490D	BraA10g014010.3C	0.00858783	0.070636	0.121579	2.35453	yes
BnaCnng33990D	BraA04g013920.3C	0.004809	0.0929784	0.0517217	3.09928	yes
BnaCnng40140D	BraA07g022030.3C	7.98129e-05	0.0798129	0.001	2.66043	yes
BnaCnng46390D	BraA05g021730.3C	0.0750117	0.267792	0.280112	8.9264	yes
BnaCnng48400D	BraA09g005810.3C	0.0130785	0.200548	0.0652139	6.68493	yes
BnaCnng51160D	BraA10g028050.3C	0.0685964	0.0550161	1.24684	1.83387	no
BnaCnng51240D	BraA08g030240.3C	0.00012225	0.12225	0.001	4.075	yes
BnaCnng54670D	BraA10g028050.3C	0.024034	0.0174604	1.37649	0.582013	no
BnaA01g01300D	BolC1t00251H	0.00264049	0.0676484	0.0390326	2.25495	yes
BnaA01g16780D	BolC1t02390H	0.00328282	0.0909024	0.0361137	3.03008	yes
BnaA01g17560D	BolC1t02610H	0.00704564	0.0665524	0.105866	2.21841	yes
BnaA01g25670D	BolC1t04365H	0.00497341	0.0690819	0.071993	2.30273	yes
BnaA01g27470D	BolC1t04696H	0.0211897	0.183965	0.115183	6.13217	yes
BnaA01g28850D	BolC1t04873H	0.0206632	0.120777	0.171085	4.0259	yes
BnaA01g32320D	BolC1t05493H	0.000218708	0.218708	0.001	7.29027	yes
BnaA02g07130D	BolC9t58017H	0.09383	0.537733	0.174492	17.9244	yes
BnaA02g10330D	BolC2t07988H	5.50751e-05	0.0550751	0.001	1.83584	yes
BnaA02g15070D	BolC2t08845H	0.0691963	0.259377	0.266779	8.6459	yes
BnaA02g19070D	BolC5t30226H	0.00965215	0.75787	0.0127359	25.2623	yes
BnaA02g26550D	BolC2t11178H	0.000114047	0.114047	0.001	3.80157	yes
BnaA03g12310D	BolC2t07988H	0.000207585	0.207585	0.001	6.9195	yes
BnaA03g15110D	BolC3t14523H	0.012527	0.0326318	0.38389	1.08773	yes
BnaA03g21240D	BolC3t15385H	0.00454908	0.0727374	0.0625411	2.42458	yes
BnaA03g31080D	BolC3t16671H	0.000137863	0.137863	0.001	4.59543	yes
BnaA03g37430D	BolC3t17653H	0.0408889	0.0681663	0.599841	2.27221	yes
BnaA03g39290D	BolC3t18025H	0.02165	0.0928217	0.233243	3.09406	yes
BnaA03g55110D	BolC3t12794H	0.00588736	0.0396799	0.148371	1.32266	yes
BnaA04g02190D	BolC4t25013H	0.00262289	0.16078	0.0163136	5.35933	yes
BnaA04g05360D	BolC6t36845H	0.0351949	0.182814	0.192518	6.0938	yes
BnaA04g11090D	BolC4t26431H	0.00532735	0.107202	0.0496947	3.5734	yes
BnaA04g19750D	BolC4t27799H	0.0203511	0.119802	0.169873	3.9934	yes
BnaA04g26620D	BolC4t28701H	0.0063987	0.106476	0.0600951	3.5492	yes
BnaA04g27280D	BolC4t24594H	0.00360388	0.0539251	0.0668311	1.7975	yes
BnaA05g13430D	BolC6t36845H	0.00344482	0.0194292	0.177301	0.64764	yes
BnaA05g14750D	BolC6t36729H	0.0636834	0.111977	0.568718	3.73257	yes
BnaA05g14770D	BolC6t36615H	0.0423248	0.111872	0.378334	3.72907	yes
BnaA05g15820D	BolC5t32090H	0.00765491	0.0671977	0.113916	2.23992	yes
BnaA05g18620D	BolC5t32355H	0.05656	0.0954611	0.592493	3.18204	yes
BnaA05g19090D	BolC5t33170H	0.00980781	0.0515991	0.190077	1.71997	yes
BnaA05g24190D	BolC5t33869H	0.0205394	0.0765301	0.268383	2.551	yes
BnaA05g29530D	BolC1t05493H	0.00316914	0.227356	0.0139391	7.57853	yes
BnaA05g37000D	BolC5t34100H	0.0128255	0.153835	0.0833722	5.12783	yes
BnaA06g01230D	BolC6t35948H	0.038746	0.165808	0.23368	5.52693	yes
BnaA06g02780D	BolC6t35678H	0.00247014	0.131612	0.0187684	4.38707	yes
BnaA06g09230D	BolC5t29974H	7.29096e-05	0.0729096	0.001	2.43032	yes
BnaA06g10330D	BolC1t05493H	2.47845e-05	0.0247845	0.001	0.82615	yes
BnaA06g11360D	BolC5t30226H	0.00331837	0.10385	0.0319534	3.46167	yes
BnaA06g11590D	BolC5t30274H	3.81238e-05	0.0381238	0.001	1.27079	yes
BnaA06g27860D	BolC7t44745H	0.00010393	0.10393	0.001	3.46433	yes
BnaA06g34030D	BolC7t43846H	0.000225274	0.225274	0.001	7.50913	yes
BnaA07g03330D	BolC7t41090H	0.0320938	0.0903661	0.355153	3.0122	yes
BnaA07g03430D	BolC7t41105H	0.00301394	6.02789e-05	50	0.0020093	no
BnaA07g10040D	BolC7t42573H	0.051069	0.133679	0.382026	4.45597	yes
BnaA07g15340D	BolC4t26431H	0.0132443	0.135757	0.097559	4.52523	yes
BnaA07g17510D	BolC6t37643H	0.000112979	0.112979	0.001	3.76597	yes
BnaA07g34450D	BolC2t09607H	0.0028115	0.280933	0.0100077	9.36443	yes
BnaA07g38410D	BolC2t09607H	0.0141	0.345807	0.0407742	11.5269	yes
BnaA08g01350D	BolC3t21421H	0.0100258	0.058368	0.171769	1.9456	yes
BnaA08g02120D	BolC3t21284H	0.0595413	0.106427	0.559459	3.54757	yes
BnaA08g07400D	BolC1t04696H	0.0172289	0.113813	0.151379	3.79377	yes
BnaA08g13930D	BolC8t48730H	0.00749842	0.0920554	0.0814555	3.06851	yes
BnaA08g20580D	BolC8t49820H	0.011814	0.201309	0.0586857	6.7103	yes
BnaA08g23200D	BolC8t49407H	0.0113416	0.0697061	0.162706	2.32354	yes
BnaA08g23450D	BolC5t30226H	0.00893829	0.267348	0.0334332	8.9116	yes
BnaA08g24010D	BolC8t52129H	0.000294813	0.294813	0.001	9.8271	yes
BnaA08g24020D	BolC8t52129H	0.17145	0.473896	0.361788	15.7965	yes
BnaA09g04490D	BolC9t53594H	0.0112613	0.0757441	0.148676	2.5248	yes
BnaA09g09660D	BolC9t54310H	0.0825324	0.187358	0.440506	6.24527	yes
BnaA09g11510D	BolC9t54697H	0.0698885	0.307266	0.227453	10.2422	yes
BnaA09g16240D	BolC9t55455H	0.0140305	0.0764357	0.18356	2.54786	yes
BnaA09g19140D	BolC2t11178H	0.000367507	0.367507	0.001	12.2502	yes
BnaA09g30000D	BolC5t30945H	0.00290844	0.112023	0.0259629	3.7341	yes
BnaA09g32990D	BolC6t36845H	0.0185149	0.291481	0.0635202	9.71603	yes
BnaA09g45050D	BolC8t51946H	0.0151938	0.0529326	0.28704	1.76442	yes
BnaA09g57120D	BolC8t52129H	0.000117916	0.117916	0.001	3.93053	yes
BnaA10g06670D	BolC9t57185H	0.0109272	0.0927364	0.117831	3.09121	yes
BnaA10g10300D	BolC9t57588H	0.00536631	0.0800664	0.0670232	2.66888	yes
BnaA10g10530D	BolC3t15385H	0.0122252	0.02982	0.409968	0.994	yes
BnaA10g12310D	BolC9t58017H	0.049941	0.256903	0.194396	8.56343	yes
BnaA10g25250D	BolC3t12794H	0.081501	0.317994	0.256297	10.5998	yes
BnaA10g28230D	BolC6t35251H	0.00919927	0.0565644	0.162634	1.88548	yes
BnaAnng09200D	BolC6t39980H	0.00782522	0.153127	0.0511028	5.10423	yes
BnaAnng13030D	BolC5t30226H	0.00573144	0.323182	0.0177344	10.7727	yes
BnaAnng19750D	BolC7t46593H	0.015993	0.101154	0.158106	3.3718	yes
BnaAnng21880D	BolC2t12287H	5.60002e-05	0.0560002	0.001	1.86667	yes
BnaAnng28650D	BolC2t07662H	0.0102972	0.100014	0.102958	3.3338	yes
BnaAnng34240D	BolC8t50942H	0.0112457	0.0972039	0.115692	3.24013	yes
BnaC01g02310D	BolC1t00251H	0.00355599	0.0319827	0.111185	1.06609	yes
BnaC01g20530D	BolC1t02390H	0.00134425	0.0118385	0.113549	0.394617	yes
BnaC01g21910D	BolC1t02610H	0.00734431	0.0353815	0.207575	1.17938	yes
BnaC01g32360D	BolC3t15385H	0.00554114	0.0237309	0.233499	0.79103	yes
BnaC01g32800D	BolC1t04365H	0.00540878	0.00652573	0.828839	0.217524	yes
BnaC01g39370D	BolC1t05493H	0.019256	0.0248755	0.774094	0.829183	yes
BnaC01g44130D	BolC1t04696H	0.00251783	0.0443193	0.0568112	1.47731	yes
BnaC02g02910D	BolC3t15385H	0.0173599	0.0169412	1.02472	0.564707	no
BnaC02g10070D	BolC9t58017H	0.0957044	0.617658	0.154947	20.5886	yes
BnaC02g12440D	BolC2t07661H	0.00608926	0.000130621	46.618	0.00435403	no
BnaC02g12450D	BolC2t07662H	0.00294816	0.017831	0.165339	0.594367	yes
BnaC02g25260D	BolC2t09607H	3.21424e-05	0.0321424	0.001	1.07141	yes
BnaC03g01930D	BolC3t12794H	0.00117718	2.35435e-05	50	0.000784783	no
BnaC03g13840D	BolC2t07662H	0.077684	0.355893	0.218279	11.8631	yes
BnaC03g14940D	BolC3t14184H	0.0226921	0.0106504	2.13064	0.355013	no
BnaC03g18130D	BolC3t14523H	0.0118381	0.0294872	0.401465	0.982907	yes
BnaC03g36410D	BolC3t16671H	2.16351e-05	0.0216351	0.001	0.72117	yes
BnaC03g43880D	BolC3t17653H	0.141422	0.210729	0.671108	7.0243	yes
BnaC03g43940D	BolC3t17653H	0.018575	0.0641384	0.289609	2.13795	yes
BnaC03g63160D	BolC3t20467H	0.0339797	0.0379389	0.895642	1.26463	yes
BnaC03g69050D	BolC3t21421H	0.00698536	0.0534999	0.130568	1.78333	yes
BnaC04g21410D	BolC4t24594H	2.95501e-05	0.0295501	0.001	0.985003	yes
BnaC04g28100D	BolC6t36845H	0.0392273	0.152748	0.25681	5.0916	yes
BnaC04g37650D	BolC9t57588H	0.00257388	0.0257331	0.100022	0.85777	yes
BnaC04g50680D	BolC4t28701H	0.0020692	4.1384e-05	50	0.00137947	no
BnaC05g10640D	BolC5t29974H	0.00599082	0.0275515	0.217441	0.918383	yes
BnaC05g12900D	BolC5t30226H	2.3635e-05	0.023635	0.001	0.787833	yes
BnaC05g13430D	BolC5t30274H	0.00182452	0.0142259	0.128253	0.474197	yes
BnaC05g18550D	BolC5t30945H	0.013138	0.0258086	0.509056	0.860287	yes
BnaC05g25370D	BolC5t32355H	0.0319301	0.0538146	0.593335	1.79382	yes
BnaC05g27620D	BolC5t32450H	0.0142196	0.0248741	0.571661	0.829137	yes
BnaC05g32470D	BolC5t33170H	0.00240293	0.0190899	0.125875	0.63633	yes
BnaC05g38230D	BolC5t33869H	0.00246916	0.00901624	0.273857	0.300541	yes
BnaC05g39770D	BolC5t34100H	2.24444e-05	0.0224444	0.001	0.748147	yes
BnaC05g43870D	BolC1t05493H	0.00618324	0.256145	0.0241397	8.53817	yes
BnaC05g51200D	BolC5t32090H	0.00270031	5.40062e-05	50	0.00180021	no
BnaC06g01080D	BolC6t35251H	8.06723e-06	0.00806723	0.001	0.268908	yes
BnaC06g03670D	BolC6t35678H	2.03105e-05	0.0203105	0.001	0.677017	yes
BnaC06g06060D	BolC6t35948H	0.00084489	0.0195207	0.0432816	0.65069	yes
BnaC06g10370D	BolC6t36729H	0.0427017	0.0498154	0.857198	1.66051	yes
BnaC06g16140D	BolC6t37643H	9.58953e-06	0.00958953	0.001	0.319651	yes
BnaC06g20310D	BolC6t38200H	0.00517283	0.0436662	0.118463	1.45554	yes
BnaC06g27370D	BolC9t53393H	0.0408624	0.0348803	1.1715	1.16268	no
BnaC06g36210D	BolC6t39980H	8.75314e-06	0.00875314	0.001	0.291771	yes
BnaC06g39290D	BolC2t09607H	0.00565666	0.244166	0.0231673	8.13887	yes
BnaC06g41780D	BolC6t36615H	0.0100599	0.0167081	0.6021	0.556937	yes
BnaC06g41980D	BolC6t36727H	0.00971652	0.0257324	0.377599	0.857747	yes
BnaC06g42330D	BolC4t26431H	0.0155846	0.15543	0.100268	5.181	yes
BnaC07g13160D	BolC7t42573H	0.0380636	0.0857769	0.443752	2.85923	yes
BnaC07g29090D	BolC7t44745H	4.8642e-05	0.048642	0.001	1.6214	yes
BnaC07g51150D	BolC7t46593H	0.00272716	0.0343729	0.0793404	1.14576	yes
BnaC08g12720D	BolC8t48730H	0.00345981	0.00787251	0.43948	0.262417	yes
BnaC08g17090D	BolC5t30226H	0.00589036	0.400728	0.0146992	13.3576	yes
BnaC08g23790D	BolC6t36845H	0.0176091	0.295163	0.0596588	9.83877	yes
BnaC08g28860D	BolC8t50942H	0.00628087	0.0156283	0.401891	0.520943	yes
BnaC08g37880D	BolC8t51946H	0.00363108	8.06806e-05	45.0056	0.00268935	no
BnaC08g39660D	BolC8t52129H	3.85502e-05	0.0385502	0.001	1.28501	yes
BnaC09g11960D	BolC9t54697H	0.0679797	0.365327	0.186079	12.1776	yes
BnaC09g12280D	BolC9t54697H	0.00292737	5.87648e-05	49.8151	0.00195883	no
BnaC09g29580D	BolC9t57185H	0.0106984	0.0570779	0.187434	1.9026	yes
BnaC09g51120D	BolC9t54310H	1.18131e-05	0.0118131	0.001	0.39377	yes
BnaCnng33990D	BolC4t26431H	2.33e-05	0.0233	0.001	0.776667	yes
BnaCnng48400D	BolC9t53594H	0.102033	0.156318	0.652724	5.2106	yes
BnaCnng51160D	BolC3t12794H	0.127152	0.377463	0.336859	12.5821	yes
BnaCnng51240D	BolC8t52129H	0.000266084	0.266084	0.001	8.86947	yes
BnaCnng54670D	BolC9t59922H	0.00955493	0.0148081	0.645249	0.493603	yes
BnaCnng59170D	BolC5t32288H	0.0309045	0.0318921	0.969035	1.06307	yes
