# Supplementary material for: Genome-wide characterization of ubiquitin-conjugating enzyme gene family explores its genetic effects on the oil content and yield of Brassica napus
Source: Front Plant Sci. 2023 Mar 20;14:1118339. doi: 10.3389/fpls.2023.1118339 (PMC10067767; doi:10.3389/fpls.2023.1118339)
Supplement: Supplementary file 15 [file Table_10.xlsx]

## Sheet: Sheet1
Table S10. Potential miRNA targets of BnUBCs.
miRNA_Acc.	Target_Acc.	Expectation	miRNA_start	miRNA_end	Target_start	Target_end	miRNA_aligned_fragment	alignment	Target_aligned_fragment	Inhibition	Multiplicity
bna-miR399a	BnaA04g19750D	0	1	21	1050	1070	UGCCAAAGGAGAUUUGCCCGG	..:::::::::::::::::::	UUGGGCAAAUCUCCUUUGGCA	Cleavage	5
bna-miR399b	BnaA04g19750D	0	1	21	1050	1070	UGCCAAAGGAGAUUUGCCCGG	..:::::::::::::::::::	UUGGGCAAAUCUCCUUUGGCA	Cleavage	5
bna-miR399c	BnaA04g19750D	0.5	1	21	1050	1070	UGCCAAAGGAGAUUUGUCCGG	..::.::::::::::::::::	UUGGGCAAAUCUCCUUUGGCA	Cleavage	5
bna-miR399a	BnaA04g19750D	1	1	21	1226	1246	UGCCAAAGGAGAUUUGCCCGG	::::::::::::::::::	UUCGGCAAAUCUCCUUUGGCA	Cleavage	5
bna-miR399a	BnaA04g19750D	1	1	21	1345	1365	UGCCAAAGGAGAUUUGCCCGG	: : :::::::::::::::::	CAGAGCAAAUCUCCUUUGGCA	Cleavage	5
bna-miR399a	BnaA04g19750D	1	1	21	1145	1165	UGCCAAAGGAGAUUUGCCCGG	::::: :::::::::::::	UGGGGCAUAUCUCCUUUGGCA	Cleavage	5
bna-miR399b	BnaA04g19750D	1	1	21	1226	1246	UGCCAAAGGAGAUUUGCCCGG	::::::::::::::::::	UUCGGCAAAUCUCCUUUGGCA	Cleavage	5
bna-miR399b	BnaA04g19750D	1	1	21	1345	1365	UGCCAAAGGAGAUUUGCCCGG	: : :::::::::::::::::	CAGAGCAAAUCUCCUUUGGCA	Cleavage	5
bna-miR399b	BnaA04g19750D	1	1	21	1145	1165	UGCCAAAGGAGAUUUGCCCGG	::::: :::::::::::::	UGGGGCAUAUCUCCUUUGGCA	Cleavage	5
bna-miR399c	BnaA04g19750D	1.5	1	21	1226	1246	UGCCAAAGGAGAUUUGUCCGG	:.::::::::::::::::	UUCGGCAAAUCUCCUUUGGCA	Cleavage	5
bna-miR399c	BnaA04g19750D	1.5	1	21	1345	1365	UGCCAAAGGAGAUUUGUCCGG	: : .::::::::::::::::	CAGAGCAAAUCUCCUUUGGCA	Cleavage	5
bna-miR399c	BnaA04g19750D	1.5	1	21	1145	1165	UGCCAAAGGAGAUUUGUCCGG	::.:: :::::::::::::	UGGGGCAUAUCUCCUUUGGCA	Cleavage	5
bna-miR399a	BnaA04g19750D	2	1	21	1287	1308	UGCCAAAGGAGAUUUGC-CCGG	.::: :::::::::::::::::	UCGGAGCAAAUCUCCUUUGGCA	Cleavage	5
bna-miR399b	BnaA04g19750D	2	1	21	1287	1308	UGCCAAAGGAGAUUUGC-CCGG	.::: :::::::::::::::::	UCGGAGCAAAUCUCCUUUGGCA	Cleavage	5
bna-miR399c	BnaA04g19750D	2	1	21	1287	1308	UGCCAAAGGAGAUUUG-UCCGG	.:::: ::::::::::::::::	UCGGAGCAAAUCUCCUUUGGCA	Cleavage	5
bna-miR169m	BnaC06g03670D	3	1	21	515	535	UGAGCCAAAGAUGACUUGCCG	.::.::::.::::::: .:::	UGGUAAGUUAUCUUUGUUUCA	Cleavage	1
bna-miR396a	BnaA05g24190D	3	1	21	2546	2566	UUCCACAGCUUUCUUGAACUU	::::::::::: :::::.	UCGUUCAAGAAAGAUGUGGGU	Cleavage	1
bna-miR396a	BnaC05g38230D	3	1	21	2595	2615	UUCCACAGCUUUCUUGAACUU	::::::::::: :::::.	UCGUUCAAGAAAGAUGUGGGU	Cleavage	1
bna-miR6034	BnaC06g36210D	3	1	21	1431	1451	UCUGAUGUAUAUAGCUUUGGG	.:::: ::::::::.:::.:	UCCAAUGCUAUAUAUAUCGGU	Cleavage	1
bna-miR6034	BnaAnng09200D	3	1	21	1305	1325	UCUGAUGUAUAUAGCUUUGGG	..::: ::::::::.:::.:	UUCAAUGCUAUAUAUAUCGGU	Cleavage	1
bna-miR156b	BnaC04g28100D	3.5	1	21	939	959	UUGACAGAAGAUAGAGAGCAC	:::::: :::::: :::::	AUGCUCUGUAUCUUAUGUCAU	Cleavage	1
bna-miR156c	BnaC04g28100D	3.5	1	21	939	959	UUGACAGAAGAUAGAGAGCAC	:::::: :::::: :::::	AUGCUCUGUAUCUUAUGUCAU	Cleavage	1
bna-miR156g	BnaC04g28100D	3.5	1	21	939	959	UUGACAGAAGAUAGAGAGCAC	:::::: :::::: :::::	AUGCUCUGUAUCUUAUGUCAU	Cleavage	1
bna-miR159	BnaA02g26550D	3.5	1	21	217	237	UUUGGAUUGAAGGGAGCUCUA	:: .:.:.::.::::.:::	AUGAAUUUCUUUUAAUCUAAA	Cleavage	1
bna-miR172a	BnaC06g20310D	3.5	1	21	195	215	AGAAUCUUGAUGAUGCUGCAU	: : :: :::::::::.:::	ACGAAGAAUCAUCAAGGUUCG	Cleavage	1
bna-miR172a	BnaA07g38410D	3.5	1	21	21	41	AGAAUCUUGAUGAUGCUGCAU	: :: :::::::::.:::	CAGAAGAAUCAUCAAGGUUCG	Cleavage	1
bna-miR172b	BnaC06g20310D	3.5	1	21	195	215	GGAAUCUUGAUGAUGCUGCAU	: : :: :::::::::.:::	ACGAAGAAUCAUCAAGGUUCG	Cleavage	1
bna-miR172b	BnaA07g38410D	3.5	1	21	21	41	GGAAUCUUGAUGAUGCUGCAU	: :: :::::::::.:::	CAGAAGAAUCAUCAAGGUUCG	Cleavage	1
bna-miR172c	BnaC06g20310D	3.5	1	21	195	215	GGAAUCUUGAUGAUGCUGCAU	: : :: :::::::::.:::	ACGAAGAAUCAUCAAGGUUCG	Cleavage	1
bna-miR172c	BnaA07g38410D	3.5	1	21	21	41	GGAAUCUUGAUGAUGCUGCAU	: :: :::::::::.:::	CAGAAGAAUCAUCAAGGUUCG	Cleavage	1
bna-miR172d	BnaA07g38410D	3.5	1	21	21	41	AGAAUCUUGAUGAUGCUGCAG	: : :: :::::::::.:::	CAGAAGAAUCAUCAAGGUUCG	Cleavage	1
bna-miR172d	BnaC06g20310D	3.5	1	21	195	215	AGAAUCUUGAUGAUGCUGCAG	: :: :::::::::.:::	ACGAAGAAUCAUCAAGGUUCG	Cleavage	1
bna-miR2111a-3p	BnaA05g18620D	3.5	1	21	1140	1160	GUCCUCGGGAUGCGGAUUACC	::::.::::::.: :::..	UUUAAUUCGCAUCUCAAGGGU	Cleavage	1
bna-miR395a	BnaC04g44130D	3.5	1	21	449	469	CUGAAGUGUUUGGGGGAACUC	:::::.:::::.:. :.::	CUGUUCCUCCAAAUAUGUUAG	Cleavage	1
bna-miR395b	BnaC04g44130D	3.5	1	21	449	469	CUGAAGUGUUUGGGGGAACUC	:::::.:::::.:. :.::	CUGUUCCUCCAAAUAUGUUAG	Cleavage	1
bna-miR395c	BnaC04g44130D	3.5	1	21	449	469	CUGAAGUGUUUGGGGGAACUC	:::::.:::::.:. :.::	CUGUUCCUCCAAAUAUGUUAG	Cleavage	1
bna-miR403	BnaA07g03330D	3.5	1	21	10348	10368	UUAGAUUCACGCACAAACUCG	:: ::::: :::::::::	ACUGUAUGUGCAUGAAUCUAA	Translation	1
bna-miR156a	BnaA05g24190D	4	1	21	492	512	UGACAGAAGAGAGUGAGCACA	: ::.::.::.:.::.: :::	UCUGUUCGCUUUUUUUUUUCA	Cleavage	1
bna-miR156a	BnaC01g02310D	4	1	21	799	819	UGACAGAAGAGAGUGAGCACA	: ::. .:.:::::::: :::	UUUGUGUAUUCUCUUCUUUCA	Cleavage	1
bna-miR156b	BnaC03g16350D	4	1	21	727	746	UUGACAGAAGAUAGAGAGCAC	:::: ::::::.:::::.	AAUCUCU-UAUCUUUUGUCAG	Cleavage	1
bna-miR156c	BnaC03g16350D	4	1	21	727	746	UUGACAGAAGAUAGAGAGCAC	:::: ::::::.:::::.	AAUCUCU-UAUCUUUUGUCAG	Cleavage	1
bna-miR156d	BnaA05g24190D	4	1	20	493	512	UGACAGAAGAGAGUGAGCAC	::.::.::.:.::.: :::	CUGUUCGCUUUUUUUUUUCA	Cleavage	1
bna-miR156d	BnaC01g02310D	4	1	20	800	819	UGACAGAAGAGAGUGAGCAC	::. .:.:::::::: :::	UUGUGUAUUCUCUUCUUUCA	Cleavage	1
bna-miR156e	BnaA05g24190D	4	1	20	493	512	UGACAGAAGAGAGUGAGCAC	::.::.::.:.::.: :::	CUGUUCGCUUUUUUUUUUCA	Cleavage	1
bna-miR156e	BnaC01g02310D	4	1	20	800	819	UGACAGAAGAGAGUGAGCAC	::. .:.:::::::: :::	UUGUGUAUUCUCUUCUUUCA	Cleavage	1
bna-miR156f	BnaA05g24190D	4	1	20	493	512	UGACAGAAGAGAGUGAGCAC	::.::.::.:.::.: :::	CUGUUCGCUUUUUUUUUUCA	Cleavage	1
bna-miR156f	BnaC01g02310D	4	1	20	800	819	UGACAGAAGAGAGUGAGCAC	::. .:.:::::::: :::	UUGUGUAUUCUCUUCUUUCA	Cleavage	1
bna-miR156g	BnaC03g16350D	4	1	21	727	746	UUGACAGAAGAUAGAGAGCAC	:::: ::::::.:::::.	AAUCUCU-UAUCUUUUGUCAG	Cleavage	1
bna-miR159	BnaC08g06250D	4	1	21	231	251	UUUGGAUUGAAGGGAGCUCUA	::: ::::::.::.:::	GUAAGCCCCCUUCGAUUCAAU	Cleavage	1
bna-miR168a	BnaC03g63160D	4	1	21	3009	3029	UCGCUUGGUGCAGGUCGGGAA	::::: :.::::.::: .::	AUCCCGCCUUGCAUCAAUUGA	Cleavage	3
bna-miR168a	BnaC03g63160D	4	1	21	4800	4820	UCGCUUGGUGCAGGUCGGGAA	::::: :.::::.::: .::	AUCCCGCCUUGCAUCAAUUGA	Cleavage	3
bna-miR168a	BnaC03g63160D	4	1	21	9537	9557	UCGCUUGGUGCAGGUCGGGAA	::::: :.::::.::: .::	AUCCCGCCUUGCAUCAAUUGA	Cleavage	3
bna-miR172a	BnaA02g19070D	4	1	21	152	172	AGAAUCUUGAUGAUGCUGCAU	: :: :::::::::.::.	CCGAAGAAUCAUCAAGGUUUG	Cleavage	1
bna-miR172b	BnaC07g05960D	4	1	21	3650	3670	GGAAUCUUGAUGAUGCUGCAU	.:: : : ::::::::.::.:	GUGGAACUUCAUCAAGGUUUC	Cleavage	1
bna-miR172b	BnaA02g19070D	4	1	21	152	172	GGAAUCUUGAUGAUGCUGCAU	: :: :::::::::.::.	CCGAAGAAUCAUCAAGGUUUG	Cleavage	1
bna-miR172c	BnaC07g05960D	4	1	21	3650	3670	GGAAUCUUGAUGAUGCUGCAU	.:: : : ::::::::.::.:	GUGGAACUUCAUCAAGGUUUC	Cleavage	1
bna-miR172c	BnaA02g19070D	4	1	21	152	172	GGAAUCUUGAUGAUGCUGCAU	: :: :::::::::.::.	CCGAAGAAUCAUCAAGGUUUG	Cleavage	1
bna-miR172d	BnaA02g19070D	4	1	21	152	172	AGAAUCUUGAUGAUGCUGCAG	: : :: :::::::::.::.	CCGAAGAAUCAUCAAGGUUUG	Cleavage	1
bna-miR2111a-3p	BnaC05g25370D	4	1	21	859	879	GUCCUCGGGAUGCGGAUUACC	::::..:::::.: :::..	UUUAAUUUGCAUCUCAAGGGU	Cleavage	1
bna-miR393	BnaC05g25370D	4	1	21	1304	1324	UCCAAAGGGAUCGCAUUGAUC	::: : :.:::.::::::::	GAUGAUAGUGAUUCCUUUGGA	Cleavage	1
bna-miR393	BnaA05g18620D	4	1	21	1585	1605	UCCAAAGGGAUCGCAUUGAUC	::: : :.:::.::::::::	GAUGAUAGUGAUUCCUUUGGA	Cleavage	1
bna-miR395a	BnaA04g19750D	4	1	21	1991	2011	CUGAAGUGUUUGGGGGAACUC	:::::.:::::.:. :..:	CUGUUCCUCCAAAUAUGUUGG	Cleavage	1
bna-miR395b	BnaA04g19750D	4	1	21	1991	2011	CUGAAGUGUUUGGGGGAACUC	:::::.:::::.:. :..:	CUGUUCCUCCAAAUAUGUUGG	Cleavage	1
bna-miR395c	BnaA04g19750D	4	1	21	1991	2011	CUGAAGUGUUUGGGGGAACUC	:::::.:::::.:. :..:	CUGUUCCUCCAAAUAUGUUGG	Cleavage	1
bna-miR395d	BnaC04g44130D	4	1	21	449	469	CUGAAGUGUUUGGGGGGACUC	::.::.:::::.:. :.::	CUGUUCCUCCAAAUAUGUUAG	Cleavage	1
bna-miR395e	BnaC04g44130D	4	1	21	449	469	CUGAAGUGUUUGGGGGGACUC	::.::.:::::.:. :.::	CUGUUCCUCCAAAUAUGUUAG	Cleavage	1
bna-miR395f	BnaC04g44130D	4	1	21	449	469	CUGAAGUGUUUGGGGGGACUC	::.::.:::::.:. :.::	CUGUUCCUCCAAAUAUGUUAG	Cleavage	1
bna-miR397a	BnaA01g17560D	4	1	22	1824	1845	UCAUUGAGUGCAGCGUUGAUGU	:.: ::::::: :::::: ::	UCGUGAACGCUGAACUCAAAGA	Translation	1
bna-miR397b	BnaA01g17560D	4	1	22	1824	1845	UCAUUGAGUGCAGCGUUGAUGU	:.: ::::::: :::::: ::	UCGUGAACGCUGAACUCAAAGA	Translation	1
bna-miR403	BnaC07g05960D	4	1	21	7957	7977	UUAGAUUCACGCACAAACUCG	:: ::::: :::::::.:	ACUGUAUGUGCAUGAAUCUGA	Translation	1
bna-miR6028	BnaC01g44130D	4	1	21	668	688	UGGAGAGUAAGGACAUUCAGA	: ::::: ::.::.::.::.	UAUGAAUCUCUUUGCUUUCUU	Cleavage	1
bna-miR6028	BnaA08g07400D	4	1	21	617	637	UGGAGAGUAAGGACAUUCAGA	: ::::: ::.::.::.::.	UAUGAAUCUCUUUGCUUUCUU	Cleavage	1
bna-miR6028	BnaC04g21410D	4	1	21	146	166	UGGAGAGUAAGGACAUUCAGA	:: ::::. :::::::::	CAUGUAUGUUAUUACUCUCCC	Translation	1
bna-miR6035	BnaCnng48400D	4	1	21	114	133	UGGAGUAGAAAAUGCAGUCGU	:.:::: :.:: :::::::::	AUGACU-CGUUGUCUACUCCA	Translation	1
bna-miR860	BnaA08g01350D	4	1	21	2162	2182	UCAAUACAUUGGACUACAUAU	: .:: :::::: :::::::	AGGUGGUGUCCAAGGUAUUGA	Cleavage	1
bna-miR1140	BnaA05g15820D	4.5	1	21	532	552	ACAGCCUAAACCAAUCGGAGC	::. :.:::: ::.::.:::	ACUUGGGUUGGGUUGGGUUGU	Translation	1
bna-miR156a	BnaA05g15820D	4.5	1	21	108	128	UGACAGAAGAGAGUGAGCACA	::: .::.::::::::: ::	UGUUUUCGCUCUCUUCUCUCU	Cleavage	1
bna-miR156a	BnaC08g39660D	4.5	1	21	268	288	UGACAGAAGAGAGUGAGCACA	:::.:...:.: ::.:::::	GGUGUUUGUUUUGUUUUGUCA	Cleavage	1
bna-miR156a	BnaA06g09230D	4.5	1	21	1599	1619	UGACAGAAGAGAGUGAGCACA	::.:::::.:.::.:::	AUUGUUCACUUUUUUUUGUAU	Cleavage	1
bna-miR156a	BnaC06g36210D	4.5	1	21	993	1013	UGACAGAAGAGAGUGAGCACA	::: ::: :.::::::::.:	UGUCCUCUGUUUCUUCUGUUA	Cleavage	1
bna-miR156a	BnaC02g25260D	4.5	1	21	799	819	UGACAGAAGAGAGUGAGCACA	::: :...::::::.:::.:	UGUCAUUGUUCUCUUUUGUUA	Cleavage	1
bna-miR156a	BnaA03g39290D	4.5	1	21	662	682	UGACAGAAGAGAGUGAGCACA	: ::.:..::::::::: ::	UCUGUUUGCUCUCUUCUUACA	Cleavage	1
bna-miR156a	BnaC07g51150D	4.5	1	21	663	683	UGACAGAAGAGAGUGAGCACA	: ::. ::.:::::::: ::	UUUGUGCAUUCUCUUCUUUCU	Cleavage	1
bna-miR156a	BnaC01g39370D	4.5	1	21	7465	7485	UGACAGAAGAGAGUGAGCACA	:: : .:.::::.:::::	GAUGAACCUUUUCUUUUGUCA	Cleavage	1
bna-miR156a	BnaA06g10330D	4.5	1	21	703	723	UGACAGAAGAGAGUGAGCACA	:: : .:.::::.:::::	GAUGAACCUUUUCUUUUGUCA	Cleavage	1
bna-miR156a	BnaA01g32320D	4.5	1	21	659	679	UGACAGAAGAGAGUGAGCACA	:: : .:.::::.:::::	GAUGAACCUUUUCUUUUGUCA	Cleavage	1
bna-miR156b	BnaC05g43870D	4.5	1	21	706	726	UUGACAGAAGAUAGAGAGCAC	:: ::.:.:.:.:::: ::::	GUUCUUUUUGUUUUCUUUCAA	Cleavage	1
bna-miR156c	BnaC05g43870D	4.5	1	21	706	726	UUGACAGAAGAUAGAGAGCAC	:: ::.:.:.:.:::: ::::	GUUCUUUUUGUUUUCUUUCAA	Cleavage	1
bna-miR156d	BnaA06g09230D	4.5	1	20	1600	1619	UGACAGAAGAGAGUGAGCAC	::.:::::.:.::.:::	UUGUUCACUUUUUUUUGUAU	Cleavage	1
bna-miR156d	BnaC08g39660D	4.5	1	20	269	288	UGACAGAAGAGAGUGAGCAC	:::.:...:.: ::.:::::	GUGUUUGUUUUGUUUUGUCA	Cleavage	1
bna-miR156d	BnaA05g15820D	4.5	1	20	109	128	UGACAGAAGAGAGUGAGCAC	:: .::.::::::::: ::	GUUUUCGCUCUCUUCUCUCU	Cleavage	1
bna-miR156d	BnaA03g39290D	4.5	1	20	663	682	UGACAGAAGAGAGUGAGCAC	::.:..::::::::: ::	CUGUUUGCUCUCUUCUUACA	Cleavage	1
bna-miR156d	BnaC06g36210D	4.5	1	20	994	1013	UGACAGAAGAGAGUGAGCAC	:: ::: :.::::::::.:	GUCCUCUGUUUCUUCUGUUA	Cleavage	1
bna-miR156d	BnaC02g25260D	4.5	1	20	800	819	UGACAGAAGAGAGUGAGCAC	:: :...::::::.:::.:	GUCAUUGUUCUCUUUUGUUA	Cleavage	1
bna-miR156d	BnaC07g51150D	4.5	1	20	664	683	UGACAGAAGAGAGUGAGCAC	::. ::.:::::::: ::	UUGUGCAUUCUCUUCUUUCU	Cleavage	1
bna-miR156d	BnaC01g39370D	4.5	1	20	7466	7485	UGACAGAAGAGAGUGAGCAC	:: : .:.::::.:::::	AUGAACCUUUUCUUUUGUCA	Cleavage	1
bna-miR156d	BnaA06g10330D	4.5	1	20	704	723	UGACAGAAGAGAGUGAGCAC	:: : .:.::::.:::::	AUGAACCUUUUCUUUUGUCA	Cleavage	1
bna-miR156d	BnaA01g32320D	4.5	1	20	660	679	UGACAGAAGAGAGUGAGCAC	:: : .:.::::.:::::	AUGAACCUUUUCUUUUGUCA	Cleavage	1
bna-miR156e	BnaA06g09230D	4.5	1	20	1600	1619	UGACAGAAGAGAGUGAGCAC	::.:::::.:.::.:::	UUGUUCACUUUUUUUUGUAU	Cleavage	1
bna-miR156e	BnaC08g39660D	4.5	1	20	269	288	UGACAGAAGAGAGUGAGCAC	:::.:...:.: ::.:::::	GUGUUUGUUUUGUUUUGUCA	Cleavage	1
bna-miR156e	BnaA05g15820D	4.5	1	20	109	128	UGACAGAAGAGAGUGAGCAC	:: .::.::::::::: ::	GUUUUCGCUCUCUUCUCUCU	Cleavage	1
bna-miR156e	BnaA03g39290D	4.5	1	20	663	682	UGACAGAAGAGAGUGAGCAC	::.:..::::::::: ::	CUGUUUGCUCUCUUCUUACA	Cleavage	1
bna-miR156e	BnaC06g36210D	4.5	1	20	994	1013	UGACAGAAGAGAGUGAGCAC	:: ::: :.::::::::.:	GUCCUCUGUUUCUUCUGUUA	Cleavage	1
bna-miR156e	BnaC02g25260D	4.5	1	20	800	819	UGACAGAAGAGAGUGAGCAC	:: :...::::::.:::.:	GUCAUUGUUCUCUUUUGUUA	Cleavage	1
bna-miR156e	BnaC07g51150D	4.5	1	20	664	683	UGACAGAAGAGAGUGAGCAC	::. ::.:::::::: ::	UUGUGCAUUCUCUUCUUUCU	Cleavage	1
bna-miR156e	BnaC01g39370D	4.5	1	20	7466	7485	UGACAGAAGAGAGUGAGCAC	:: : .:.::::.:::::	AUGAACCUUUUCUUUUGUCA	Cleavage	1
bna-miR156e	BnaA06g10330D	4.5	1	20	704	723	UGACAGAAGAGAGUGAGCAC	:: : .:.::::.:::::	AUGAACCUUUUCUUUUGUCA	Cleavage	1
bna-miR156e	BnaA01g32320D	4.5	1	20	660	679	UGACAGAAGAGAGUGAGCAC	:: : .:.::::.:::::	AUGAACCUUUUCUUUUGUCA	Cleavage	1
bna-miR156f	BnaA06g09230D	4.5	1	20	1600	1619	UGACAGAAGAGAGUGAGCAC	::.:::::.:.::.:::	UUGUUCACUUUUUUUUGUAU	Cleavage	1
bna-miR156f	BnaC08g39660D	4.5	1	20	269	288	UGACAGAAGAGAGUGAGCAC	:::.:...:.: ::.:::::	GUGUUUGUUUUGUUUUGUCA	Cleavage	1
bna-miR156f	BnaA05g15820D	4.5	1	20	109	128	UGACAGAAGAGAGUGAGCAC	:: .::.::::::::: ::	GUUUUCGCUCUCUUCUCUCU	Cleavage	1
bna-miR156f	BnaA03g39290D	4.5	1	20	663	682	UGACAGAAGAGAGUGAGCAC	::.:..::::::::: ::	CUGUUUGCUCUCUUCUUACA	Cleavage	1
bna-miR156f	BnaC06g36210D	4.5	1	20	994	1013	UGACAGAAGAGAGUGAGCAC	:: ::: :.::::::::.:	GUCCUCUGUUUCUUCUGUUA	Cleavage	1
bna-miR156f	BnaC02g25260D	4.5	1	20	800	819	UGACAGAAGAGAGUGAGCAC	:: :...::::::.:::.:	GUCAUUGUUCUCUUUUGUUA	Cleavage	1
bna-miR156f	BnaC07g51150D	4.5	1	20	664	683	UGACAGAAGAGAGUGAGCAC	::. ::.:::::::: ::	UUGUGCAUUCUCUUCUUUCU	Cleavage	1
bna-miR156f	BnaC01g39370D	4.5	1	20	7466	7485	UGACAGAAGAGAGUGAGCAC	:: : .:.::::.:::::	AUGAACCUUUUCUUUUGUCA	Cleavage	1
bna-miR156f	BnaA06g10330D	4.5	1	20	704	723	UGACAGAAGAGAGUGAGCAC	:: : .:.::::.:::::	AUGAACCUUUUCUUUUGUCA	Cleavage	1
bna-miR156f	BnaA01g32320D	4.5	1	20	660	679	UGACAGAAGAGAGUGAGCAC	:: : .:.::::.:::::	AUGAACCUUUUCUUUUGUCA	Cleavage	1
bna-miR156g	BnaC05g43870D	4.5	1	21	706	726	UUGACAGAAGAUAGAGAGCAC	:: ::.:.:.:.:::: ::::	GUUCUUUUUGUUUUCUUUCAA	Cleavage	1
bna-miR159	BnaA03g13470D	4.5	1	21	49	69	UUUGGAUUGAAGGGAGCUCUA	::::.:.::.:::.: ::	AGAAGCUUCUUUUAAUUCUAA	Cleavage	1
bna-miR159	BnaA03g12310D	4.5	1	21	1237	1257	UUUGGAUUGAAGGGAGCUCUA	: :::..::.:::..:::	ACUAUCUCUUUUUAAUUUAAA	Cleavage	1
bna-miR159	BnaA03g39410D	4.5	1	21	3392	3411	UUUGGAUUGAAGGGAGCUCUA	:::: :.:::::: .::::	CUGAGC-CUCUUCAACUCAAA	Cleavage	1
bna-miR161	BnaA06g09230D	4.5	1	21	269	289	UCAAUGCACUGAAAGUGACUA	::: .:.:::..::: :::::	UAGCUAUUUUUGGUGAAUUGA	Cleavage	1
bna-miR164a	BnaC04g25550D	4.5	1	21	472	492	UGGAGAAGCAGGGCACGUGCA	::::.:::...:::: ::..:	UGCAUGUGUUUUGCUGCUUUA	Cleavage	1
bna-miR164a	BnaC06g16140D	4.5	1	21	278	298	UGGAGAAGCAGGGCACGUGCA	::. ::::...: ::::::::	UGUUCGUGUUUUUCUUCUCCA	Cleavage	1
bna-miR164a	BnaA10g28230D	4.5	1	21	98	118	UGGAGAAGCAGGGCACGUGCA	:::.:: ..:: .:::::::	CGCAUGUCUUCUAUUUCUCCA	Cleavage	1
bna-miR164a	BnaC08g39660D	4.5	1	21	168	188	UGGAGAAGCAGGGCACGUGCA	:.:: :..::.::.::::	GCCGCGAUCUUUGUUUUUCCA	Cleavage	1
bna-miR164b	BnaA10g28230D	4.5	1	21	98	118	UGGAGAAGCAGGGCACGUGCG	::::.:: ..:: .:::::::	CGCAUGUCUUCUAUUUCUCCA	Cleavage	1
bna-miR164b	BnaC04g25550D	4.5	1	21	472	492	UGGAGAAGCAGGGCACGUGCG	.:::.:::...:::: ::..:	UGCAUGUGUUUUGCUGCUUUA	Cleavage	1
bna-miR164b	BnaC06g16140D	4.5	1	21	278	298	UGGAGAAGCAGGGCACGUGCG	.:. ::::...: ::::::::	UGUUCGUGUUUUUCUUCUCCA	Cleavage	1
bna-miR164b	BnaC08g39660D	4.5	1	21	168	188	UGGAGAAGCAGGGCACGUGCG	:.:: :..::.::.::::	GCCGCGAUCUUUGUUUUUCCA	Cleavage	1
bna-miR164c	BnaA10g28230D	4.5	1	21	98	118	UGGAGAAGCAGGGCACGUGCG	::::.:: ..:: .:::::::	CGCAUGUCUUCUAUUUCUCCA	Cleavage	1
bna-miR164c	BnaC04g25550D	4.5	1	21	472	492	UGGAGAAGCAGGGCACGUGCG	.:::.:::...:::: ::..:	UGCAUGUGUUUUGCUGCUUUA	Cleavage	1
bna-miR164c	BnaC06g16140D	4.5	1	21	278	298	UGGAGAAGCAGGGCACGUGCG	.:. ::::...: ::::::::	UGUUCGUGUUUUUCUUCUCCA	Cleavage	1
bna-miR164c	BnaC08g39660D	4.5	1	21	168	188	UGGAGAAGCAGGGCACGUGCG	:.:: :..::.::.::::	GCCGCGAUCUUUGUUUUUCCA	Cleavage	1
bna-miR164d	BnaA10g28230D	4.5	1	21	98	118	UGGAGAAGCAGGGCACGUGCG	::::.:: ..:: .:::::::	CGCAUGUCUUCUAUUUCUCCA	Cleavage	1
bna-miR164d	BnaC04g25550D	4.5	1	21	472	492	UGGAGAAGCAGGGCACGUGCG	.:::.:::...:::: ::..:	UGCAUGUGUUUUGCUGCUUUA	Cleavage	1
bna-miR164d	BnaC06g16140D	4.5	1	21	278	298	UGGAGAAGCAGGGCACGUGCG	.:. ::::...: ::::::::	UGUUCGUGUUUUUCUUCUCCA	Cleavage	1
bna-miR164d	BnaC08g39660D	4.5	1	21	168	188	UGGAGAAGCAGGGCACGUGCG	:.:: :..::.::.::::	GCCGCGAUCUUUGUUUUUCCA	Cleavage	1
bna-miR169a	BnaC06g03670D	4.5	1	21	514	534	CAGCCAAGGAUGACUUGCCGA	.::.::::.:::.::: .:	AUGGUAAGUUAUCUUUGUUUC	Cleavage	1
bna-miR169b	BnaC06g03670D	4.5	1	21	514	534	CAGCCAAGGAUGACUUGCCGA	.::.::::.:::.::: .:	AUGGUAAGUUAUCUUUGUUUC	Cleavage	1
bna-miR169c	BnaC06g03670D	4.5	1	21	514	534	UAGCCAAGGAUGACUUGCCUA	::.::::.:::.::: .:	AUGGUAAGUUAUCUUUGUUUC	Cleavage	1
bna-miR169d	BnaC06g03670D	4.5	1	21	514	534	UAGCCAAGGAUGACUUGCCUA	::.::::.:::.::: .:	AUGGUAAGUUAUCUUUGUUUC	Cleavage	1
bna-miR169e	BnaC06g03670D	4.5	1	21	514	534	UAGCCAAGGAUGACUUGCCUA	::.::::.:::.::: .:	AUGGUAAGUUAUCUUUGUUUC	Cleavage	1
bna-miR169f	BnaC06g03670D	4.5	1	21	514	534	UAGCCAAGGAUGACUUGCCUA	::.::::.:::.::: .:	AUGGUAAGUUAUCUUUGUUUC	Cleavage	1
bna-miR169g	BnaC06g03670D	4.5	1	22	513	534	UAGCCAAGGAUGACUUGCCUGC	::.::::.:::.::: .:	GAUGGUAAGUUAUCUUUGUUUC	Cleavage	1
bna-miR169h	BnaC06g03670D	4.5	1	22	513	534	UAGCCAAGGAUGACUUGCCUGC	::.::::.:::.::: .:	GAUGGUAAGUUAUCUUUGUUUC	Cleavage	1
bna-miR169i	BnaC06g03670D	4.5	1	22	513	534	UAGCCAAGGAUGACUUGCCUGC	::.::::.:::.::: .:	GAUGGUAAGUUAUCUUUGUUUC	Cleavage	1
bna-miR169j	BnaC06g03670D	4.5	1	22	513	534	UAGCCAAGGAUGACUUGCCUGC	::.::::.:::.::: .:	GAUGGUAAGUUAUCUUUGUUUC	Cleavage	1
bna-miR169k	BnaC06g03670D	4.5	1	22	513	534	UAGCCAAGGAUGACUUGCCUGC	::.::::.:::.::: .:	GAUGGUAAGUUAUCUUUGUUUC	Cleavage	1
bna-miR169l	BnaC06g03670D	4.5	1	22	513	534	UAGCCAAGGAUGACUUGCCUGC	::.::::.:::.::: .:	GAUGGUAAGUUAUCUUUGUUUC	Cleavage	1
bna-miR169n	BnaC06g03670D	4.5	1	21	514	534	CAGCCAAGGAUGACUUGCCGG	.::.::::.:::.::: .:	AUGGUAAGUUAUCUUUGUUUC	Cleavage	1
bna-miR171a	BnaA03g11080D	4.5	1	21	1373	1394	UUGAGCC-GUGCCAAUAUCACG	: :::::::::.:: ::.:::.	CAUGAUAUUGGUACUGGUUCAG	Cleavage	1
bna-miR171b	BnaA03g11080D	4.5	1	21	1373	1394	UUGAGCC-GUGCCAAUAUCACG	: :::::::::.:: ::.:::.	CAUGAUAUUGGUACUGGUUCAG	Cleavage	1
bna-miR171c	BnaA03g11080D	4.5	1	21	1373	1394	UUGAGCC-GUGCCAAUAUCACG	: :::::::::.:: ::.:::.	CAUGAUAUUGGUACUGGUUCAG	Cleavage	1
bna-miR171d	BnaA03g11080D	4.5	1	21	1373	1394	UUGAGCC-GUGCCAAUAUCACG	: :::::::::.:: ::.:::.	CAUGAUAUUGGUACUGGUUCAG	Cleavage	1
bna-miR171e	BnaA03g11080D	4.5	1	21	1373	1394	UUGAGCC-GUGCCAAUAUCACG	: :::::::::.:: ::.:::.	CAUGAUAUUGGUACUGGUUCAG	Cleavage	1
bna-miR2111a-3p	BnaA05g13430D	4.5	1	21	209	229	GUCCUCGGGAUGCGGAUUACC	: ::::::.::.:.:: ::.	UGAAAUCCGUAUUCUGAUGAU	Cleavage	1
bna-miR2111b-3p	BnaC05g25370D	4.5	1	21	859	879	AUCCUCGGGAUACAGAUUACC	::::.:: :::.: :::.:	UUUAAUUUGCAUCUCAAGGGU	Cleavage	1
bna-miR2111b-3p	BnaA05g13430D	4.5	1	21	209	229	AUCCUCGGGAUACAGAUUACC	: :::: ::::.:.:: :::	UGAAAUCCGUAUUCUGAUGAU	Cleavage	1
bna-miR390a	BnaA06g11360D	4.5	1	21	865	885	AAGCUCAGGAGGGAUAGCGCC	:: . :::..:.:::::.::	UGCUUCAUCUUUUCUGAGUUU	Cleavage	1
bna-miR390a	BnaA09g34960D	4.5	1	21	673	693	AAGCUCAGGAGGGAUAGCGCC	: :: ::.:::.:::: ::	AACUCUCUCUCUCUUGAGAUU	Cleavage	1
bna-miR390b	BnaA06g11360D	4.5	1	21	865	885	AAGCUCAGGAGGGAUAGCGCC	:: . :::..:.:::::.::	UGCUUCAUCUUUUCUGAGUUU	Cleavage	1
bna-miR390b	BnaA09g34960D	4.5	1	21	673	693	AAGCUCAGGAGGGAUAGCGCC	: :: ::.:::.:::: ::	AACUCUCUCUCUCUUGAGAUU	Cleavage	1
bna-miR390c	BnaA06g11360D	4.5	1	21	865	885	AAGCUCAGGAGGGAUAGCGCC	:: . :::..:.:::::.::	UGCUUCAUCUUUUCUGAGUUU	Cleavage	1
bna-miR390c	BnaA09g34960D	4.5	1	21	673	693	AAGCUCAGGAGGGAUAGCGCC	: :: ::.:::.:::: ::	AACUCUCUCUCUCUUGAGAUU	Cleavage	1
bna-miR393	BnaC04g23980D	4.5	1	21	1663	1683	UCCAAAGGGAUCGCAUUGAUC	:..::: :::.: ::::::	UUUUGAUGAGAUUCAUUUGGA	Cleavage	1
bna-miR393	BnaA03g12310D	4.5	1	21	165	185	UCCAAAGGGAUCGCAUUGAUC	: :: ::. ::::.::::::	GCUCUUUGUAAUCCUUUUGGA	Cleavage	1
bna-miR394a	BnaC09g51120D	4.5	1	20	122	141	UUGGCAUUCUGUCCACCUCC	:::: ::..::::::.:	AUAGGUUGAUGGAAUGCUAC	Cleavage	1
bna-miR394a	BnaA03g39410D	4.5	1	20	5295	5314	UUGGCAUUCUGUCCACCUCC	: :::::::::: ::..:	UCACGUGGACAGAAAGCUGA	Cleavage	2
bna-miR394b	BnaC09g51120D	4.5	1	20	122	141	UUGGCAUUCUGUCCACCUCC	:::: ::..::::::.:	AUAGGUUGAUGGAAUGCUAC	Cleavage	1
bna-miR394b	BnaA03g39410D	4.5	1	20	5295	5314	UUGGCAUUCUGUCCACCUCC	: :::::::::: ::..:	UCACGUGGACAGAAAGCUGA	Cleavage	2
bna-miR395d	BnaA04g19750D	4.5	1	21	1991	2011	CUGAAGUGUUUGGGGGGACUC	::.::.:::::.:. :..:	CUGUUCCUCCAAAUAUGUUGG	Cleavage	1
bna-miR395e	BnaA04g19750D	4.5	1	21	1991	2011	CUGAAGUGUUUGGGGGGACUC	::.::.:::::.:. :..:	CUGUUCCUCCAAAUAUGUUGG	Cleavage	1
bna-miR395f	BnaA04g19750D	4.5	1	21	1991	2011	CUGAAGUGUUUGGGGGGACUC	::.::.:::::.:. :..:	CUGUUCCUCCAAAUAUGUUGG	Cleavage	1
bna-miR396a	BnaC08g37880D	4.5	1	21	2153	2173	UUCCACAGCUUUCUUGAACUU	.::: .::::::: :::::.	GAGUCAGAGAAAGCAGUGGAG	Cleavage	1
bna-miR396a	BnaA09g45050D	4.5	1	21	2192	2212	UUCCACAGCUUUCUUGAACUU	.::: .::::::: :::::.	GAGUCAGAGAAAGCAGUGGAG	Cleavage	1
bna-miR399c	BnaC05g43870D	4.5	1	21	389	409	UGCCAAAGGAGAUUUGUCCGG	.: :..:::::..:::: ::	AUGCAUGAAUCUUUUUUGCCA	Cleavage	1
bna-miR399c	BnaA08g23200D	4.5	1	21	238	258	UGCCAAAGGAGAUUUGUCCGG	:: ::::: .:::::::.	UAUGAGAAAUCAUCUUUGGCG	Translation	1
bna-miR6028	BnaC07g05960D	4.5	1	21	2556	2576	UGGAGAGUAAGGACAUUCAGA	:.::::: :.::::.:.: .:	UUUGAAUAUUCUUAUUUUGUA	Cleavage	2
bna-miR6028	BnaC07g05960D	4.5	1	21	5224	5244	UGGAGAGUAAGGACAUUCAGA	.: ::: :..:::.:::::	GUUCAAUCUUUUUAUUCUCCU	Cleavage	2
bna-miR6028	BnaA05g14740D	4.5	1	21	1353	1373	UGGAGAGUAAGGACAUUCAGA	:.:::.: ::.::..:::...	UUUGAGUUUCUUUGUUCUUUG	Cleavage	1
bna-miR6028	BnaC05g12900D	4.5	1	21	1167	1188	UGGAGAGUAAGGAC-AUUCAGA	::::: :::.:::::::..	AGUGAAUUGUCUUUACUCUUUC	Cleavage	1
bna-miR6028	BnaA06g11360D	4.5	1	21	992	1013	UGGAGAGUAAGGAC-AUUCAGA	::::: :::.:::::::..	AGUGAAUUGUCUUUACUCUUUU	Cleavage	1
bna-miR6028	BnaC09g29580D	4.5	1	21	1616	1636	UGGAGAGUAAGGACAUUCAGA	.: .::::..::.::.::..	AUUUGAUGUUUUUGCUUUCUG	Cleavage	1
bna-miR6028	BnaA10g06670D	4.5	1	21	1533	1553	UGGAGAGUAAGGACAUUCAGA	.: .::::..::.::.::..	AUUUGAUGUUUUUGCUUUCUG	Cleavage	1
bna-miR6028	BnaA07g03330D	4.5	1	21	7614	7634	UGGAGAGUAAGGACAUUCAGA	.: ::: :..:::.:::::	GUUCAAUCUUUUUAUUCUCCU	Cleavage	1
bna-miR6029	BnaC09g29580D	4.5	1	21	1408	1428	UGGGGUUGUGAUUUCAGGCUU	.: ::::::: . :::::::	UGGGCUGAAAUGGAAACCCCA	Translation	1
bna-miR6029	BnaC03g63160D	4.5	1	21	4027	4047	UGGGGUUGUGAUUUCAGGCUU	::.: :: :::.::.::.:	UCGCUUUAAUUCAUAAUCCUA	Cleavage	2
bna-miR6030	BnaC04g28100D	4.5	1	22	956	976	UCCACCCAUACCAUACAGACCC	:::::::: ::: ::::::	UCAUCUGUAUG-UAUAGGUGGA	Translation	1
bna-miR6030	BnaA04g05360D	4.5	1	22	776	796	UCCACCCAUACCAUACAGACCC	:::::::: ::: ::::::	GUCUCUGUAUG-UAUAGGUGGA	Translation	1
bna-miR6031	BnaA07g37890D	4.5	1	24	244	267	AAGAGGUUCGGAGCGGUUUGAAGC	:::.::: .::::. :.:.::::	UCUUUAAAAUGCUCUUAGCUUCUU	Cleavage	1
bna-miR6031	BnaC04g25550D	4.5	1	24	1414	1437	AAGAGGUUCGGAGCGGUUUGAAGC	..::::.:::::::::	UGAUGUGUUUGCUCUGAACCUCUU	Cleavage	1
bna-miR6031	BnaA07g03330D	4.5	1	24	113	136	AAGAGGUUCGGAGCGGUUUGAAGC	.:.: :::.:::.:.:::	AUUGAGAGCAGCUUCGAGCUUCUC	Cleavage	1
bna-miR6031	BnaC07g05960D	4.5	1	24	114	137	AAGAGGUUCGGAGCGGUUUGAAGC	.:.: :::.:::.:.:::	AUUGAGAGCAGCUUCGAGCUUCUC	Cleavage	1
bna-miR6032	BnaA04g26620D	4.5	1	21	184	204	UGGAGCAUCAACAGAUCUCGG	.:::::::::::: ::.	UUUGGAUCUGUUGAUGAUCUC	Cleavage	1
bna-miR6033	BnaC09g34500D	4.5	1	21	2031	2051	UGAACCAGAUAGAGUGGGACU	: : .: ::.:::::: ::::	AAUAUCUCUUUAUCUGAUUCA	Cleavage	1
bna-miR6034	BnaA05g17560D	4.5	1	21	166	186	UCUGAUGUAUAUAGCUUUGGG	:::::.:.:::::: ::.: :	CCCAAGGUUAUAUAAAUUAAA	Cleavage	1
bna-miR6035	BnaC07g05960D	4.5	1	21	1057	1077	UGGAGUAGAAAAUGCAGUCGU	..:.:::: ::: :::.::.:	GUGGCUGCCUUUGCUAUUCUA	Cleavage	1
bna-miR6035	BnaA06g02780D	4.5	1	21	1144	1164	UGGAGUAGAAAAUGCAGUCGU	: ::::::::.:::::	UCACAUUCAUUUUCUGCUCCA	Cleavage	1
bna-miR824	BnaC08g06250D	4.5	1	21	1028	1048	UAGACCAUUUGUGAGAAGGGA	: :.:: .:::::::::: :	UGCUUUACUACAAAUGGUCCA	Cleavage	1
bna-miR860	BnaC03g25550D	4.5	1	21	812	831	UCAAUACAUUGGACUACAUAU	: ::: :::::::::: :::.	ACAUGGAGUCCAAUGU-UUGG	Cleavage	1
bna-miR860	BnaA03g21240D	4.5	1	21	761	780	UCAAUACAUUGGACUACAUAU	: ::: :::::::::: :::.	ACAUGGAGUCCAAUGU-UUGG	Cleavage	1
bna-miR860	BnaC03g69050D	4.5	1	21	2212	2232	UCAAUACAUUGGACUACAUAU	: .:: ::.::: :::::::	AGGUGGUGUUCAAGGUAUUGA	Cleavage	1
bna-miR1140	BnaC08g23790D	5	1	21	2079	2099	ACAGCCUAAACCAAUCGGAGC	:..:::::::::.: .: :	AGUUUGAUUGGUUUGGUUUCU	Cleavage	1
bna-miR1140	BnaA09g32990D	5	1	21	578	598	ACAGCCUAAACCAAUCGGAGC	:..:::::::::.: .: :	AGUUUGAUUGGUUUGGUUUCU	Cleavage	1
bna-miR1140	BnaC03g63160D	5	1	21	3230	3250	ACAGCCUAAACCAAUCGGAGC	.:..: :::::::: ::: :	AUUUUGCUUGGUUUAAGCUAU	Cleavage	2
bna-miR1140	BnaC03g63160D	5	1	21	5024	5044	ACAGCCUAAACCAAUCGGAGC	.:..: :::::::: ::: :	AUUUUGCUUGGUUUAAGCUAU	Cleavage	2
bna-miR156a	BnaC06g10370D	5	1	21	1033	1053	UGACAGAAGAGAGUGAGCACA	: : .:. ::.: ::::::::	UAUUUUUUCUUUGUUCUGUCA	Cleavage	1
bna-miR156a	BnaCnng51160D	5	1	21	1197	1217	UGACAGAAGAGAGUGAGCACA	::.:.. .::::::::::	AAUGUUUGGAUUCUUCUGUCA	Cleavage	1
bna-miR156a	BnaCnng54670D	5	1	21	1077	1097	UGACAGAAGAGAGUGAGCACA	::.:.. .::::::::::	AAUGUUUGGAUUCUUCUGUCA	Cleavage	1
bna-miR156a	BnaC03g63160D	5	1	21	156	176	UGACAGAAGAGAGUGAGCACA	: : ::...:.::::.:::.	UCUACUUGUUUUCUUUUGUUU	Cleavage	1
bna-miR156a	BnaC06g16140D	5	1	21	573	593	UGACAGAAGAGAGUGAGCACA	:: ..:.::::::::.:	CUCUCUGGUUUUCUUCUGUUA	Cleavage	1
bna-miR156a	BnaC06g30850D	5	1	21	84	104	UGACAGAAGAGAGUGAGCACA	::: :::::::::: .:	GUCUCUCUCUCUCUUCUGGUA	Cleavage	1
bna-miR156a	BnaA07g28330D	5	1	21	84	104	UGACAGAAGAGAGUGAGCACA	::: :::::::::: .:	CUCUCUCUCUCUCUUCUGGUA	Cleavage	1
bna-miR156a	BnaA07g15340D	5	1	21	788	808	UGACAGAAGAGAGUGAGCACA	: ::.:. ::.::::.: :.:	UUUGUUUUCUUUCUUUUUUUA	Cleavage	1
bna-miR156a	BnaA08g09170D	5	1	21	117	137	UGACAGAAGAGAGUGAGCACA	: :: ::::.::.::::	GAUACUGUCUCUUUUUUGUCC	Cleavage	1
bna-miR156b	BnaA01g28850D	5	1	21	1554	1574	UUGACAGAAGAUAGAGAGCAC	::.:.:.:.:.::.:::. :	UUGUUUUUUGUUUUUUGUUUA	Cleavage	1
bna-miR156b	BnaC06g36210D	5	1	21	994	1014	UUGACAGAAGAUAGAGAGCAC	:: :::: : ::::::::.:	GUCCUCUGUUUCUUCUGUUAC	Cleavage	1
bna-miR156b	BnaA07g15340D	5	1	21	789	809	UUGACAGAAGAUAGAGAGCAC	::.:.::: ::::.: :.::	UUGUUUUCUUUCUUUUUUUAA	Cleavage	1
bna-miR156b	BnaC06g10370D	5	1	21	1034	1054	UUGACAGAAGAUAGAGAGCAC	: .:.::: : :::::::::	AUUUUUUCUUUGUUCUGUCAA	Translation	1
bna-miR156b	BnaA03g13470D	5	1	21	747	767	UUGACAGAAGAUAGAGAGCAC	::::.::::::. :: ::	AAUCUCUUUAUCUUUGGUAAA	Cleavage	1
bna-miR156b	BnaC06g30850D	5	1	21	85	105	UUGACAGAAGAUAGAGAGCAC	:::::: ::::::: .:.	UCUCUCUCUCUCUUCUGGUAG	Cleavage	1
bna-miR156b	BnaA07g28330D	5	1	21	85	105	UUGACAGAAGAUAGAGAGCAC	:::::: ::::::: .:.	UCUCUCUCUCUCUUCUGGUAG	Cleavage	1
bna-miR156b	BnaA10g25250D	5	1	21	684	703	UUGACAGAAGAUAGAGAGCAC	:.::::: ::: :::::::	UAGUUCUCUUUCU-CUGUCAA	Cleavage	1
bna-miR156b	BnaC06g06060D	5	1	21	1489	1509	UUGACAGAAGAUAGAGAGCAC	: : :.:::::.: .:::..:	GAGGUUUCUAUUUAUUGUUGA	Cleavage	2
bna-miR156b	BnaC06g06060D	5	1	21	75	94	UUGACAGAAGAUAGAGAGCAC	: :::.:::::::: :.::	UCGAUCUUUAUCUUCU-UUAA	Cleavage	2
bna-miR156b	BnaC05g12900D	5	1	21	204	224	UUGACAGAAGAUAGAGAGCAC	:.:.: : :.::.:::.::	CCGUUUUGUUUUUUUUGUUAA	Cleavage	1
bna-miR156b	BnaA01g25670D	5	1	21	947	967	UUGACAGAAGAUAGAGAGCAC	:::. .:.:.: ::::.::	UGGCUUCUUGUUUACUGUUAA	Cleavage	1
bna-miR156c	BnaA01g28850D	5	1	21	1554	1574	UUGACAGAAGAUAGAGAGCAC	::.:.:.:.:.::.:::. :	UUGUUUUUUGUUUUUUGUUUA	Cleavage	1
bna-miR156c	BnaC06g36210D	5	1	21	994	1014	UUGACAGAAGAUAGAGAGCAC	:: :::: : ::::::::.:	GUCCUCUGUUUCUUCUGUUAC	Cleavage	1
bna-miR156c	BnaA07g15340D	5	1	21	789	809	UUGACAGAAGAUAGAGAGCAC	::.:.::: ::::.: :.::	UUGUUUUCUUUCUUUUUUUAA	Cleavage	1
bna-miR156c	BnaC06g10370D	5	1	21	1034	1054	UUGACAGAAGAUAGAGAGCAC	: .:.::: : :::::::::	AUUUUUUCUUUGUUCUGUCAA	Translation	1
bna-miR156c	BnaA03g13470D	5	1	21	747	767	UUGACAGAAGAUAGAGAGCAC	::::.::::::. :: ::	AAUCUCUUUAUCUUUGGUAAA	Cleavage	1
bna-miR156c	BnaC06g30850D	5	1	21	85	105	UUGACAGAAGAUAGAGAGCAC	:::::: ::::::: .:.	UCUCUCUCUCUCUUCUGGUAG	Cleavage	1
bna-miR156c	BnaA07g28330D	5	1	21	85	105	UUGACAGAAGAUAGAGAGCAC	:::::: ::::::: .:.	UCUCUCUCUCUCUUCUGGUAG	Cleavage	1
bna-miR156c	BnaA10g25250D	5	1	21	684	703	UUGACAGAAGAUAGAGAGCAC	:.::::: ::: :::::::	UAGUUCUCUUUCU-CUGUCAA	Cleavage	1
bna-miR156c	BnaC06g06060D	5	1	21	1489	1509	UUGACAGAAGAUAGAGAGCAC	: : :.:::::.: .:::..:	GAGGUUUCUAUUUAUUGUUGA	Cleavage	2
bna-miR156c	BnaC06g06060D	5	1	21	75	94	UUGACAGAAGAUAGAGAGCAC	: :::.:::::::: :.::	UCGAUCUUUAUCUUCU-UUAA	Cleavage	2
bna-miR156c	BnaC05g12900D	5	1	21	204	224	UUGACAGAAGAUAGAGAGCAC	:.:.: : :.::.:::.::	CCGUUUUGUUUUUUUUGUUAA	Cleavage	1
bna-miR156c	BnaA01g25670D	5	1	21	947	967	UUGACAGAAGAUAGAGAGCAC	:::. .:.:.: ::::.::	UGGCUUCUUGUUUACUGUUAA	Cleavage	1
bna-miR156d	BnaCnng51160D	5	1	20	1198	1217	UGACAGAAGAGAGUGAGCAC	::.:.. .::::::::::	AUGUUUGGAUUCUUCUGUCA	Cleavage	1
bna-miR156d	BnaCnng54670D	5	1	20	1078	1097	UGACAGAAGAGAGUGAGCAC	::.:.. .::::::::::	AUGUUUGGAUUCUUCUGUCA	Cleavage	1
bna-miR156d	BnaC06g16140D	5	1	20	574	593	UGACAGAAGAGAGUGAGCAC	:: ..:.::::::::.:	UCUCUGGUUUUCUUCUGUUA	Cleavage	1
bna-miR156d	BnaC06g30850D	5	1	20	85	104	UGACAGAAGAGAGUGAGCAC	::: :::::::::: .:	UCUCUCUCUCUCUUCUGGUA	Cleavage	1
bna-miR156d	BnaA07g28330D	5	1	20	85	104	UGACAGAAGAGAGUGAGCAC	::: :::::::::: .:	UCUCUCUCUCUCUUCUGGUA	Cleavage	1
bna-miR156d	BnaC03g63160D	5	1	20	157	176	UGACAGAAGAGAGUGAGCAC	: ::...:.::::.:::.	CUACUUGUUUUCUUUUGUUU	Cleavage	1
bna-miR156d	BnaC06g10370D	5	1	20	1034	1053	UGACAGAAGAGAGUGAGCAC	: .:. ::.: ::::::::	AUUUUUUCUUUGUUCUGUCA	Cleavage	1
bna-miR156d	BnaA07g15340D	5	1	20	789	808	UGACAGAAGAGAGUGAGCAC	::.:. ::.::::.: :.:	UUGUUUUCUUUCUUUUUUUA	Cleavage	1
bna-miR156d	BnaA08g09170D	5	1	20	118	137	UGACAGAAGAGAGUGAGCAC	: :: ::::.::.::::	AUACUGUCUCUUUUUUGUCC	Cleavage	1
bna-miR156e	BnaCnng51160D	5	1	20	1198	1217	UGACAGAAGAGAGUGAGCAC	::.:.. .::::::::::	AUGUUUGGAUUCUUCUGUCA	Cleavage	1
bna-miR156e	BnaCnng54670D	5	1	20	1078	1097	UGACAGAAGAGAGUGAGCAC	::.:.. .::::::::::	AUGUUUGGAUUCUUCUGUCA	Cleavage	1
bna-miR156e	BnaC06g16140D	5	1	20	574	593	UGACAGAAGAGAGUGAGCAC	:: ..:.::::::::.:	UCUCUGGUUUUCUUCUGUUA	Cleavage	1
bna-miR156e	BnaC06g30850D	5	1	20	85	104	UGACAGAAGAGAGUGAGCAC	::: :::::::::: .:	UCUCUCUCUCUCUUCUGGUA	Cleavage	1
bna-miR156e	BnaA07g28330D	5	1	20	85	104	UGACAGAAGAGAGUGAGCAC	::: :::::::::: .:	UCUCUCUCUCUCUUCUGGUA	Cleavage	1
bna-miR156e	BnaC03g63160D	5	1	20	157	176	UGACAGAAGAGAGUGAGCAC	: ::...:.::::.:::.	CUACUUGUUUUCUUUUGUUU	Cleavage	1
bna-miR156e	BnaC06g10370D	5	1	20	1034	1053	UGACAGAAGAGAGUGAGCAC	: .:. ::.: ::::::::	AUUUUUUCUUUGUUCUGUCA	Cleavage	1
bna-miR156e	BnaA07g15340D	5	1	20	789	808	UGACAGAAGAGAGUGAGCAC	::.:. ::.::::.: :.:	UUGUUUUCUUUCUUUUUUUA	Cleavage	1
bna-miR156e	BnaA08g09170D	5	1	20	118	137	UGACAGAAGAGAGUGAGCAC	: :: ::::.::.::::	AUACUGUCUCUUUUUUGUCC	Cleavage	1
bna-miR156f	BnaCnng51160D	5	1	20	1198	1217	UGACAGAAGAGAGUGAGCAC	::.:.. .::::::::::	AUGUUUGGAUUCUUCUGUCA	Cleavage	1
bna-miR156f	BnaCnng54670D	5	1	20	1078	1097	UGACAGAAGAGAGUGAGCAC	::.:.. .::::::::::	AUGUUUGGAUUCUUCUGUCA	Cleavage	1
bna-miR156f	BnaC03g63160D	5	1	20	157	176	UGACAGAAGAGAGUGAGCAC	: ::...:.::::.:::.	CUACUUGUUUUCUUUUGUUU	Cleavage	1
bna-miR156f	BnaC06g16140D	5	1	20	574	593	UGACAGAAGAGAGUGAGCAC	:: ..:.::::::::.:	UCUCUGGUUUUCUUCUGUUA	Cleavage	1
bna-miR156f	BnaC06g30850D	5	1	20	85	104	UGACAGAAGAGAGUGAGCAC	::: :::::::::: .:	UCUCUCUCUCUCUUCUGGUA	Cleavage	1
bna-miR156f	BnaA07g28330D	5	1	20	85	104	UGACAGAAGAGAGUGAGCAC	::: :::::::::: .:	UCUCUCUCUCUCUUCUGGUA	Cleavage	1
bna-miR156f	BnaC06g10370D	5	1	20	1034	1053	UGACAGAAGAGAGUGAGCAC	: .:. ::.: ::::::::	AUUUUUUCUUUGUUCUGUCA	Cleavage	1
bna-miR156f	BnaA07g15340D	5	1	20	789	808	UGACAGAAGAGAGUGAGCAC	::.:. ::.::::.: :.:	UUGUUUUCUUUCUUUUUUUA	Cleavage	1
bna-miR156f	BnaA08g09170D	5	1	20	118	137	UGACAGAAGAGAGUGAGCAC	: :: ::::.::.::::	AUACUGUCUCUUUUUUGUCC	Cleavage	1
bna-miR156g	BnaA01g28850D	5	1	21	1554	1574	UUGACAGAAGAUAGAGAGCAC	::.:.:.:.:.::.:::. :	UUGUUUUUUGUUUUUUGUUUA	Cleavage	1
bna-miR156g	BnaC06g36210D	5	1	21	994	1014	UUGACAGAAGAUAGAGAGCAC	:: :::: : ::::::::.:	GUCCUCUGUUUCUUCUGUUAC	Cleavage	1
bna-miR156g	BnaA07g15340D	5	1	21	789	809	UUGACAGAAGAUAGAGAGCAC	::.:.::: ::::.: :.::	UUGUUUUCUUUCUUUUUUUAA	Cleavage	1
bna-miR156g	BnaC06g10370D	5	1	21	1034	1054	UUGACAGAAGAUAGAGAGCAC	: .:.::: : :::::::::	AUUUUUUCUUUGUUCUGUCAA	Translation	1
bna-miR156g	BnaA03g13470D	5	1	21	747	767	UUGACAGAAGAUAGAGAGCAC	::::.::::::. :: ::	AAUCUCUUUAUCUUUGGUAAA	Cleavage	1
bna-miR156g	BnaC06g30850D	5	1	21	85	105	UUGACAGAAGAUAGAGAGCAC	:::::: ::::::: .:.	UCUCUCUCUCUCUUCUGGUAG	Cleavage	1
bna-miR156g	BnaA07g28330D	5	1	21	85	105	UUGACAGAAGAUAGAGAGCAC	:::::: ::::::: .:.	UCUCUCUCUCUCUUCUGGUAG	Cleavage	1
bna-miR156g	BnaA10g25250D	5	1	21	684	703	UUGACAGAAGAUAGAGAGCAC	:.::::: ::: :::::::	UAGUUCUCUUUCU-CUGUCAA	Cleavage	1
bna-miR156g	BnaC06g06060D	5	1	21	1489	1509	UUGACAGAAGAUAGAGAGCAC	: : :.:::::.: .:::..:	GAGGUUUCUAUUUAUUGUUGA	Cleavage	2
bna-miR156g	BnaC06g06060D	5	1	21	75	94	UUGACAGAAGAUAGAGAGCAC	: :::.:::::::: :.::	UCGAUCUUUAUCUUCU-UUAA	Cleavage	2
bna-miR156g	BnaC05g12900D	5	1	21	204	224	UUGACAGAAGAUAGAGAGCAC	:.:.: : :.::.:::.::	CCGUUUUGUUUUUUUUGUUAA	Cleavage	1
bna-miR156g	BnaA01g25670D	5	1	21	947	967	UUGACAGAAGAUAGAGAGCAC	:::. .:.:.: ::::.::	UGGCUUCUUGUUUACUGUUAA	Cleavage	1
bna-miR159	BnaA08g20580D	5	1	21	183	203	UUUGGAUUGAAGGGAGCUCUA	::: :::::::::.: :	GUAAGCCCCCUUCAAUUCCAU	Cleavage	1
bna-miR161	BnaC05g10640D	5	1	21	281	301	UCAAUGCACUGAAAGUGACUA	::: .:.:::..::: ::::.	UAGCUAUUUUUGGUGAAUUGG	Cleavage	1
bna-miR164a	BnaA08g13930D	5	1	21	678	698	UGGAGAAGCAGGGCACGUGCA	: : : : :.:: ::::::::	UCCUCCUCCUCUCCUUCUCCA	Cleavage	1
bna-miR164a	BnaC08g37880D	5	1	21	1196	1216	UGGAGAAGCAGGGCACGUGCA	:.:.:: :..:: ::::.::	CGUAUGUUCUUUGGUUCUUCA	Cleavage	2
bna-miR164a	BnaC08g37880D	5	1	21	1979	1999	UGGAGAAGCAGGGCACGUGCA	::.:: ..: ::::.:.::	CUCAUGUUUUCAGCUUUUUCA	Translation	2
bna-miR164a	BnaC06g01080D	5	1	21	84	104	UGGAGAAGCAGGGCACGUGCA	:::.:: ..:: .::::.::	CGCAUGUCUUCUAUUUCUUCA	Cleavage	1
bna-miR164a	BnaA07g03330D	5	1	21	11928	11948	UGGAGAAGCAGGGCACGUGCA	: .:: ::.:::.:::::.	AGGGCGAGCUCUGUUUCUCUU	Cleavage	1
bna-miR164a	BnaC05g10640D	5	1	21	175	195	UGGAGAAGCAGGGCACGUGCA	::: : .:::.::.::::	ACAACGAGAUCUGUUUUUCCA	Cleavage	1
bna-miR164a	BnaA09g45050D	5	1	21	2027	2047	UGGAGAAGCAGGGCACGUGCA	::.:: ..: ::::.:.::	CUCAUGUUUUCAGCUUUUUCA	Translation	1
bna-miR164b	BnaC08g37880D	5	1	21	1196	1216	UGGAGAAGCAGGGCACGUGCG	::.:.:: :..:: ::::.::	CGUAUGUUCUUUGGUUCUUCA	Cleavage	2
bna-miR164b	BnaC08g37880D	5	1	21	1979	1999	UGGAGAAGCAGGGCACGUGCG	: ::.:: ..: ::::.:.::	CUCAUGUUUUCAGCUUUUUCA	Translation	2
bna-miR164b	BnaC06g01080D	5	1	21	84	104	UGGAGAAGCAGGGCACGUGCG	::::.:: ..:: .::::.::	CGCAUGUCUUCUAUUUCUUCA	Cleavage	1
bna-miR164b	BnaA08g13930D	5	1	21	678	698	UGGAGAAGCAGGGCACGUGCG	: : : :.:: ::::::::	UCCUCCUCCUCUCCUUCUCCA	Cleavage	1
bna-miR164b	BnaA07g03330D	5	1	21	11928	11948	UGGAGAAGCAGGGCACGUGCG	: .:: ::.:::.:::::.	AGGGCGAGCUCUGUUUCUCUU	Cleavage	1
bna-miR164b	BnaA09g45050D	5	1	21	2027	2047	UGGAGAAGCAGGGCACGUGCG	: ::.:: ..: ::::.:.::	CUCAUGUUUUCAGCUUUUUCA	Translation	1
bna-miR164b	BnaC05g10640D	5	1	21	175	195	UGGAGAAGCAGGGCACGUGCG	::: : .:::.::.::::	ACAACGAGAUCUGUUUUUCCA	Cleavage	1
bna-miR164c	BnaC08g37880D	5	1	21	1196	1216	UGGAGAAGCAGGGCACGUGCG	::.:.:: :..:: ::::.::	CGUAUGUUCUUUGGUUCUUCA	Cleavage	2
bna-miR164c	BnaC08g37880D	5	1	21	1979	1999	UGGAGAAGCAGGGCACGUGCG	: ::.:: ..: ::::.:.::	CUCAUGUUUUCAGCUUUUUCA	Translation	2
bna-miR164c	BnaC06g01080D	5	1	21	84	104	UGGAGAAGCAGGGCACGUGCG	::::.:: ..:: .::::.::	CGCAUGUCUUCUAUUUCUUCA	Cleavage	1
bna-miR164c	BnaA08g13930D	5	1	21	678	698	UGGAGAAGCAGGGCACGUGCG	: : : :.:: ::::::::	UCCUCCUCCUCUCCUUCUCCA	Cleavage	1
bna-miR164c	BnaA07g03330D	5	1	21	11928	11948	UGGAGAAGCAGGGCACGUGCG	: .:: ::.:::.:::::.	AGGGCGAGCUCUGUUUCUCUU	Cleavage	1
bna-miR164c	BnaA09g45050D	5	1	21	2027	2047	UGGAGAAGCAGGGCACGUGCG	: ::.:: ..: ::::.:.::	CUCAUGUUUUCAGCUUUUUCA	Translation	1
bna-miR164c	BnaC05g10640D	5	1	21	175	195	UGGAGAAGCAGGGCACGUGCG	::: : .:::.::.::::	ACAACGAGAUCUGUUUUUCCA	Cleavage	1
bna-miR164d	BnaC06g01080D	5	1	21	84	104	UGGAGAAGCAGGGCACGUGCG	::::.:: ..:: .::::.::	CGCAUGUCUUCUAUUUCUUCA	Cleavage	1
bna-miR164d	BnaC08g37880D	5	1	21	1196	1216	UGGAGAAGCAGGGCACGUGCG	::.:.:: :..:: ::::.::	CGUAUGUUCUUUGGUUCUUCA	Cleavage	2
bna-miR164d	BnaC08g37880D	5	1	21	1979	1999	UGGAGAAGCAGGGCACGUGCG	: ::.:: ..: ::::.:.::	CUCAUGUUUUCAGCUUUUUCA	Translation	2
bna-miR164d	BnaA08g13930D	5	1	21	678	698	UGGAGAAGCAGGGCACGUGCG	: : : :.:: ::::::::	UCCUCCUCCUCUCCUUCUCCA	Cleavage	1
bna-miR164d	BnaA07g03330D	5	1	21	11928	11948	UGGAGAAGCAGGGCACGUGCG	: .:: ::.:::.:::::.	AGGGCGAGCUCUGUUUCUCUU	Cleavage	1
bna-miR164d	BnaA09g45050D	5	1	21	2027	2047	UGGAGAAGCAGGGCACGUGCG	: ::.:: ..: ::::.:.::	CUCAUGUUUUCAGCUUUUUCA	Translation	1
bna-miR164d	BnaC05g10640D	5	1	21	175	195	UGGAGAAGCAGGGCACGUGCG	::: : .:::.::.::::	ACAACGAGAUCUGUUUUUCCA	Cleavage	1
bna-miR168a	BnaA07g15340D	5	1	21	949	969	UCGCUUGGUGCAGGUCGGGAA	.:: :.:::. :.:.::::	ACUCCAAUCUGUUCUAGGCGA	Cleavage	1
bna-miR168b	BnaC03g63160D	5	1	21	3009	3029	UCGCUUGGUGCAGGUCGAGAA	:: :: :.::::.::: .::	AUCCCGCCUUGCAUCAAUUGA	Cleavage	3
bna-miR168b	BnaC03g63160D	5	1	21	4800	4820	UCGCUUGGUGCAGGUCGAGAA	:: :: :.::::.::: .::	AUCCCGCCUUGCAUCAAUUGA	Cleavage	3
bna-miR168b	BnaC03g63160D	5	1	21	9537	9557	UCGCUUGGUGCAGGUCGAGAA	:: :: :.::::.::: .::	AUCCCGCCUUGCAUCAAUUGA	Cleavage	3
bna-miR169m	BnaA06g02780D	5	1	21	486	506	UGAGCCAAAGAUGACUUGCCG	.::..:::.: ::::: .:::	UGGUGAGUUAACUUUGUUUCA	Translation	1
bna-miR169m	BnaA05g24190D	5	1	21	824	844	UGAGCCAAAGAUGACUUGCCG	::.::::..:.:::: .::	AGGUAAGUUGUUUUUGAUUCU	Cleavage	1
bna-miR169m	BnaC09g17320D	5	1	21	895	915	UGAGCCAAAGAUGACUUGCCG	:::.:: .:.:::: .:::	GAGCAGGUAGUUUUUGUUUCA	Cleavage	1
bna-miR169m	BnaA05g19090D	5	1	21	1262	1282	UGAGCCAAAGAUGACUUGCCG	:::. ::: ::::::. ::	AAGCAGCUCAGCUUUGGUGCA	Translation	1
bna-miR172a	BnaC07g05960D	5	1	21	3650	3670	AGAAUCUUGAUGAUGCUGCAU	.:: : : ::::::::.::.	GUGGAACUUCAUCAAGGUUUC	Cleavage	1
bna-miR172a	BnaAnng09200D	5	1	21	764	784	AGAAUCUUGAUGAUGCUGCAU	..:: ::.:.:.::::.:	UCUUGGCCUCGUUAGGAUUUU	Cleavage	1
bna-miR172a	BnaC05g12900D	5	1	21	132	152	AGAAUCUUGAUGAUGCUGCAU	: :: :::::::::.: :	UCGAAGGAUCAUCAAGGUGCG	Cleavage	1
bna-miR172a	BnaAnng13030D	5	1	21	309	329	AGAAUCUUGAUGAUGCUGCAU	: :: :::::::::.: :	GCGAAGAAUCAUCAAGGUGCG	Cleavage	1
bna-miR172a	BnaC08g38130D	5	1	21	144	164	AGAAUCUUGAUGAUGCUGCAU	: :: :::::::::.: :	GCGAAGAAUCAUCAAGGUGCG	Cleavage	1
bna-miR172a	BnaA06g11360D	5	1	21	148	168	AGAAUCUUGAUGAUGCUGCAU	: :: :::::::::.: :	UCGAAGAAUCAUCAAGGUGCG	Cleavage	1
bna-miR172a	BnaA08g23450D	5	1	21	170	190	AGAAUCUUGAUGAUGCUGCAU	: :: :::::::::.: :	GCGAAGAAUCAUCAAGGUGCG	Cleavage	1
bna-miR172a	BnaC08g17090D	5	1	21	166	186	AGAAUCUUGAUGAUGCUGCAU	: :: :::::::::.: :	GCGAAGAAUCAUCAAGGUGCG	Cleavage	1
bna-miR172b	BnaC05g12900D	5	1	21	132	152	GGAAUCUUGAUGAUGCUGCAU	: :: :::::::::.: :	UCGAAGGAUCAUCAAGGUGCG	Cleavage	1
bna-miR172b	BnaAnng13030D	5	1	21	309	329	GGAAUCUUGAUGAUGCUGCAU	: :: :::::::::.: :	GCGAAGAAUCAUCAAGGUGCG	Cleavage	1
bna-miR172b	BnaC08g38130D	5	1	21	144	164	GGAAUCUUGAUGAUGCUGCAU	: :: :::::::::.: :	GCGAAGAAUCAUCAAGGUGCG	Cleavage	1
bna-miR172b	BnaA06g11360D	5	1	21	148	168	GGAAUCUUGAUGAUGCUGCAU	: :: :::::::::.: :	UCGAAGAAUCAUCAAGGUGCG	Cleavage	1
bna-miR172b	BnaA08g23450D	5	1	21	170	190	GGAAUCUUGAUGAUGCUGCAU	: :: :::::::::.: :	GCGAAGAAUCAUCAAGGUGCG	Cleavage	1
bna-miR172b	BnaC08g17090D	5	1	21	166	186	GGAAUCUUGAUGAUGCUGCAU	: :: :::::::::.: :	GCGAAGAAUCAUCAAGGUGCG	Cleavage	1
bna-miR172c	BnaC05g12900D	5	1	21	132	152	GGAAUCUUGAUGAUGCUGCAU	: :: :::::::::.: :	UCGAAGGAUCAUCAAGGUGCG	Cleavage	1
bna-miR172c	BnaAnng13030D	5	1	21	309	329	GGAAUCUUGAUGAUGCUGCAU	: :: :::::::::.: :	GCGAAGAAUCAUCAAGGUGCG	Cleavage	1
bna-miR172c	BnaC08g38130D	5	1	21	144	164	GGAAUCUUGAUGAUGCUGCAU	: :: :::::::::.: :	GCGAAGAAUCAUCAAGGUGCG	Cleavage	1
bna-miR172c	BnaA06g11360D	5	1	21	148	168	GGAAUCUUGAUGAUGCUGCAU	: :: :::::::::.: :	UCGAAGAAUCAUCAAGGUGCG	Cleavage	1
bna-miR172c	BnaA08g23450D	5	1	21	170	190	GGAAUCUUGAUGAUGCUGCAU	: :: :::::::::.: :	GCGAAGAAUCAUCAAGGUGCG	Cleavage	1
bna-miR172c	BnaC08g17090D	5	1	21	166	186	GGAAUCUUGAUGAUGCUGCAU	: :: :::::::::.: :	GCGAAGAAUCAUCAAGGUGCG	Cleavage	1
bna-miR172d	BnaAnng09200D	5	1	21	764	784	AGAAUCUUGAUGAUGCUGCAG	..:: ::.:.:.::::.:	UCUUGGCCUCGUUAGGAUUUU	Cleavage	1
bna-miR172d	BnaC07g05960D	5	1	21	3650	3670	AGAAUCUUGAUGAUGCUGCAG	:: : : ::::::::.::.	GUGGAACUUCAUCAAGGUUUC	Cleavage	1
bna-miR172d	BnaC05g12900D	5	1	21	132	152	AGAAUCUUGAUGAUGCUGCAG	: :: :::::::::.: :	UCGAAGGAUCAUCAAGGUGCG	Cleavage	1
bna-miR172d	BnaAnng13030D	5	1	21	309	329	AGAAUCUUGAUGAUGCUGCAG	: :: :::::::::.: :	GCGAAGAAUCAUCAAGGUGCG	Cleavage	1
bna-miR172d	BnaC08g38130D	5	1	21	144	164	AGAAUCUUGAUGAUGCUGCAG	: :: :::::::::.: :	GCGAAGAAUCAUCAAGGUGCG	Cleavage	1
bna-miR172d	BnaA06g11360D	5	1	21	148	168	AGAAUCUUGAUGAUGCUGCAG	: :: :::::::::.: :	UCGAAGAAUCAUCAAGGUGCG	Cleavage	1
bna-miR172d	BnaA08g23450D	5	1	21	170	190	AGAAUCUUGAUGAUGCUGCAG	: :: :::::::::.: :	GCGAAGAAUCAUCAAGGUGCG	Cleavage	1
bna-miR172d	BnaC08g17090D	5	1	21	166	186	AGAAUCUUGAUGAUGCUGCAG	: :: :::::::::.: :	GCGAAGAAUCAUCAAGGUGCG	Cleavage	1
bna-miR2111a-3p	BnaA03g55110D	5	1	21	3020	3040	GUCCUCGGGAUGCGGAUUACC	: ::: : ::::.::::::	GAUAAGCAACAUCUCGAGGAA	Cleavage	1
bna-miR2111a-3p	BnaA01g17560D	5	1	21	611	631	GUCCUCGGGAUGCGGAUUACC	::::. ::::::::: :.	UCUAAUUACCAUCCCGAGCAU	Cleavage	1
bna-miR2111a-3p	BnaC01g21910D	5	1	21	688	708	GUCCUCGGGAUGCGGAUUACC	::::. ::::::::: :.	UCUAAUUACCAUCCCGAGCAU	Cleavage	1
bna-miR2111b-3p	BnaC08g23790D	5	1	21	2771	2791	AUCCUCGGGAUACAGAUUACC	::: ::::::..:.::.	UAAAAUAUGUAUCUUGGGGGA	Cleavage	1
bna-miR2111b-3p	BnaA09g32990D	5	1	21	1398	1418	AUCCUCGGGAUACAGAUUACC	::: ::::::..:.::.	UAAAAUAUGUAUCUUGGGGGA	Cleavage	1
bna-miR2111c	BnaC04g23980D	5	1	21	629	649	UAAUCUGCAUCCUGGGGUUUA	:.:::.:..: .::::: :::	UGAACUCUGGUGUGCAGCUUA	Translation	1
bna-miR2111c	BnaA03g39410D	5	1	21	4440	4460	UAAUCUGCAUCCUGGGGUUUA	:...: ::: :::::::: ::	UGGGCACCAAGAUGCAGAAUA	Cleavage	1
bna-miR2111c	BnaC03g46750D	5	1	21	2258	2278	UAAUCUGCAUCCUGGGGUUUA	:...: ::: :::::::: ::	UGGGCACCAAGAUGCAGAAUA	Cleavage	1
bna-miR390a	BnaA02g19070D	5	1	21	297	317	AAGCUCAGGAGGGAUAGCGCC	:.:.:. ...:..:::::::	AGUGUUGAUUUUUUUGAGCUU	Cleavage	1
bna-miR390a	BnaA04g03650D	5	1	21	1134	1154	AAGCUCAGGAGGGAUAGCGCC	: :::.:::::: ::::	GAUUCCAUCUCUCCUGCGCUU	Cleavage	1
bna-miR390a	BnaC02g34760D	5	1	21	1386	1406	AAGCUCAGGAGGGAUAGCGCC	: :: ::.:::.:: :.::	CUCUCUCUCUCUCUUGUGUUU	Cleavage	1
bna-miR390b	BnaA02g19070D	5	1	21	297	317	AAGCUCAGGAGGGAUAGCGCC	:.:.:. ...:..:::::::	AGUGUUGAUUUUUUUGAGCUU	Cleavage	1
bna-miR390b	BnaA04g03650D	5	1	21	1134	1154	AAGCUCAGGAGGGAUAGCGCC	: :::.:::::: ::::	GAUUCCAUCUCUCCUGCGCUU	Cleavage	1
bna-miR390b	BnaC02g34760D	5	1	21	1386	1406	AAGCUCAGGAGGGAUAGCGCC	: :: ::.:::.:: :.::	CUCUCUCUCUCUCUUGUGUUU	Cleavage	1
bna-miR390c	BnaA02g19070D	5	1	21	297	317	AAGCUCAGGAGGGAUAGCGCC	:.:.:. ...:..:::::::	AGUGUUGAUUUUUUUGAGCUU	Cleavage	1
bna-miR390c	BnaA04g03650D	5	1	21	1134	1154	AAGCUCAGGAGGGAUAGCGCC	: :::.:::::: ::::	GAUUCCAUCUCUCCUGCGCUU	Cleavage	1
bna-miR390c	BnaC02g34760D	5	1	21	1386	1406	AAGCUCAGGAGGGAUAGCGCC	: :: ::.:::.:: :.::	CUCUCUCUCUCUCUUGUGUUU	Cleavage	1
bna-miR393	BnaC01g39370D	5	1	21	4775	4795	UCCAAAGGGAUCGCAUUGAUC	::.:: ::.:. ::::::	AUUCGAUUCGGUUGCUUUGGU	Cleavage	1
bna-miR393	BnaA09g45050D	5	1	21	2336	2357	UCCAAAGGGAUCGCA-UUGAUC	:::: ::.:::..::::: :	CUUCAACUGUGAUUUCUUUGCA	Cleavage	1
bna-miR393	BnaC08g37880D	5	1	21	2297	2318	UCCAAAGGGAUCGCA-UUGAUC	:::: ::.:::..:: ::::	CUUCAACUGUGAUUUCUGUGGA	Cleavage	1
bna-miR394a	BnaA03g39410D	5	1	20	2194	2213	UUGGCAUUCUGUCCACCUCC	: : ::...:::::.:::	UAAUGCGGGUGGAAUGUCAA	Cleavage	2
bna-miR394b	BnaA03g39410D	5	1	20	2194	2213	UUGGCAUUCUGUCCACCUCC	: : ::...:::::.:::	UAAUGCGGGUGGAAUGUCAA	Cleavage	2
bna-miR395a	BnaA07g03330D	5	1	21	7722	7742	CUGAAGUGUUUGGGGGAACUC	: ::::.:. : ::::::::	AAUUUCCUCUCAUCACUUCAG	Translation	1
bna-miR395b	BnaA07g03330D	5	1	21	7722	7742	CUGAAGUGUUUGGGGGAACUC	: ::::.:. : ::::::::	AAUUUCCUCUCAUCACUUCAG	Translation	1
bna-miR395c	BnaA07g03330D	5	1	21	7722	7742	CUGAAGUGUUUGGGGGAACUC	: ::::.:. : ::::::::	AAUUUCCUCUCAUCACUUCAG	Translation	1
bna-miR396a	BnaA07g15340D	5	1	21	1345	1365	UUCCACAGCUUUCUUGAACUU	: ::.:::.::::: :: ::	UAUUUUAAGGAAGCUUUGAAA	Cleavage	1
bna-miR396a	BnaA05g14770D	5	1	21	1651	1671	UUCCACAGCUUUCUUGAACUU	: :::: ::.:::::::	UUUAUGAAGACAGUUGUGGAA	Translation	1
bna-miR396a	BnaC06g41780D	5	1	21	1710	1730	UUCCACAGCUUUCUUGAACUU	: :::: ::.:::::::	UUUAUGAAGACAGUUGUGGAA	Translation	1
bna-miR397a	BnaC03g01930D	5	1	22	734	755	UCAUUGAGUGCAGCGUUGAUGU	.:::::: :.::. :::::::	GCAUCAAGGUUGUUGUCAAUGA	Cleavage	1
bna-miR397a	BnaA03g55110D	5	1	22	821	842	UCAUUGAGUGCAGCGUUGAUGU	.:::::: :.::. :::::::	GCAUCAAGGUUGUUGUCAAUGA	Cleavage	1
bna-miR397a	BnaA03g33820D	5	1	22	223	243	UCAUUGAGUGCAGCGUUGAUGU	:.::.:: :.::.:::.::::	AUAUUAA-GUUGUACUUAAUGU	Cleavage	1
bna-miR397b	BnaC03g01930D	5	1	22	734	755	UCAUUGAGUGCAGCGUUGAUGU	.:::::: :.::. :::::::	GCAUCAAGGUUGUUGUCAAUGA	Cleavage	1
bna-miR397b	BnaA03g55110D	5	1	22	821	842	UCAUUGAGUGCAGCGUUGAUGU	.:::::: :.::. :::::::	GCAUCAAGGUUGUUGUCAAUGA	Cleavage	1
bna-miR397b	BnaA03g33820D	5	1	22	223	243	UCAUUGAGUGCAGCGUUGAUGU	:.::.:: :.::.:::.::::	AUAUUAA-GUUGUACUUAAUGU	Cleavage	1
bna-miR399a	BnaC06g36210D	5	1	21	964	984	UGCCAAAGGAGAUUUGCCCGG	.::::: ::.: ::: ::.:	AUGGGCAUAUUUGCUUAGGUA	Cleavage	1
bna-miR399a	BnaAnng09200D	5	1	21	1014	1034	UGCCAAAGGAGAUUUGCCCGG	.::::: ::.: ::: ::.:	AUGGGCAUAUUUGCUUAGGUA	Cleavage	1
bna-miR399b	BnaC06g36210D	5	1	21	964	984	UGCCAAAGGAGAUUUGCCCGG	.::::: ::.: ::: ::.:	AUGGGCAUAUUUGCUUAGGUA	Cleavage	1
bna-miR399b	BnaAnng09200D	5	1	21	1014	1034	UGCCAAAGGAGAUUUGCCCGG	.::::: ::.: ::: ::.:	AUGGGCAUAUUUGCUUAGGUA	Cleavage	1
bna-miR403	BnaC08g26190D	5	1	21	390	410	UUAGAUUCACGCACAAACUCG	::: :::::.:: .::.:..	GGAGAUUGUGUGUUGAUUUGG	Cleavage	1
bna-miR403	BnaA09g34960D	5	1	21	367	387	UUAGAUUCACGCACAAACUCG	::: :::::.:: .::.:..	GGAGAUUGUGUGUUGAUUUGG	Cleavage	1
bna-miR6028	BnaC08g17090D	5	1	21	765	785	UGGAGAGUAAGGACAUUCAGA	:.:: . ::..::::::::.	UUUGUGAGUUUUUACUCUCUU	Cleavage	1
bna-miR6028	BnaC08g17300D	5	1	21	775	795	UGGAGAGUAAGGACAUUCAGA	:.: :.: :::::::: :.:.	UUUUAGUUUCCUUACUAUUCG	Cleavage	1
bna-miR6028	BnaA08g23200D	5	1	21	739	759	UGGAGAGUAAGGACAUUCAGA	:.: :.: :::::::: :.:.	UUUUAGUUUCCUUACUAUUCG	Cleavage	1
bna-miR6028	BnaA09g45050D	5	1	21	2053	2073	UGGAGAGUAAGGACAUUCAGA	:.::::.::::::. ..:	GUCGGAUGUUCUUACUUGUUA	Cleavage	1
bna-miR6028	BnaC08g37880D	5	1	21	2005	2025	UGGAGAGUAAGGACAUUCAGA	:.::::.::::::. ..:	GUCGGAUGUUCUUACUUGUUA	Cleavage	1
bna-miR6028	BnaC07g05830D	5	1	21	1112	1131	UGGAGAGUAAGGACAUUCAGA	:.::.:: ::.::.::::...	UUUGGAU-UCUUUGCUCUUUG	Cleavage	1
bna-miR6028	BnaA09g12050D	5	1	21	853	873	UGGAGAGUAAGGACAUUCAGA	:::.: :..: ::::::..	AAUGAGUCUUUUAACUCUCUG	Cleavage	1
bna-miR6028	BnaAnng19750D	5	1	21	700	720	UGGAGAGUAAGGACAUUCAGA	: :: ::::::: ::::.:	UGUGUUUGUCCUUUCUCUUCU	Cleavage	1
bna-miR6029	BnaC03g63160D	5	1	21	8728	8748	UGGGGUUGUGAUUUCAGGCUU	::.: :: :::.::.:..:	UCGCUUUAAUUCAUAAUCUUA	Cleavage	2
bna-miR6029	BnaA10g06670D	5	1	21	1325	1345	UGGGGUUGUGAUUUCAGGCUU	.: .:::::: . :::::::	UGGGUUGAAAUGGAAACCCCA	Translation	1
bna-miR6031	BnaC09g34500D	5	1	24	1996	2019	AAGAGGUUCGGAGCGGUUUGAAGC	:: ::.:.::: .::...:.::	CGUUGAAGCUGCUGUGAGUUUUUU	Translation	1
bna-miR6031	BnaA10g12310D	5	1	24	982	1005	AAGAGGUUCGGAGCGGUUUGAAGC	:: ::.:.::: .::...:.::	CGUUGAAGCUGCUGUGAGUUUUUU	Translation	1
bna-miR6031	BnaC05g13430D	5	1	24	780	803	AAGAGGUUCGGAGCGGUUUGAAGC	:.: :::::::: :::. .::	UUCUUAUACCGCUCCAAACUCUUU	Cleavage	1
bna-miR6031	BnaC03g63160D	5	1	24	1443	1466	AAGAGGUUCGGAGCGGUUUGAAGC	::: : .::.:::. ::::	AGAAAAAAACCUUCUGAAUAUCUU	Cleavage	1
bna-miR6031	BnaC06g41780D	5	1	24	512	535	AAGAGGUUCGGAGCGGUUUGAAGC	::.: :.::. .::::.::	AGAAGAAGCAGUUCUAGACCUUUU	Cleavage	1
bna-miR6032	BnaA03g39410D	5	1	21	519	539	UGGAGCAUCAACAGAUCUCGG	: .:::::::::: :..:	GUUAUGUCUGUUGAUGAUUUA	Cleavage	1
bna-miR6033	BnaC01g39370D	5	1	21	6948	6968	UGAACCAGAUAGAGUGGGACU	.:.::.:.:.::::::.	CUGAUCGCUUUGUUUGGUUCG	Cleavage	1
bna-miR6033	BnaA06g10330D	5	1	21	183	203	UGAACCAGAUAGAGUGGGACU	.:.::.:.:.::::::.	CUGAUCGCUUUGUUUGGUUCG	Cleavage	1
bna-miR6033	BnaA07g28330D	5	1	21	883	903	UGAACCAGAUAGAGUGGGACU	::.. .:::.:.: :::::	UUUCUUCUUCUGUUUUGUUCA	Cleavage	1
bna-miR6034	BnaC02g34760D	5	1	21	2	22	UCUGAUGUAUAUAGCUUUGGG	: ::::: :::.: ::.:::	CACAAAGAUAUGUUGAUUAGA	Cleavage	1
bna-miR6034	BnaC03g36410D	5	1	21	1390	1410	UCUGAUGUAUAUAGCUUUGGG	.:: :: ::::::.:::: :	UCCUAAAAUAUAUAUAUCAAA	Cleavage	1
bna-miR6035	BnaC03g46750D	5	1	21	1716	1736	UGGAGUAGAAAAUGCAGUCGU	:: ::::..: :::::::.:	ACUACUGUGUCUUCUACUUCU	Translation	1
bna-miR6035	BnaC06g41780D	5	1	21	1000	1020	UGGAGUAGAAAAUGCAGUCGU	:.::: :..:::::: .:.:.	AUGACGGUGUUUUCUUUUUCG	Cleavage	1
bna-miR6035	BnaA05g18620D	5	1	21	153	173	UGGAGUAGAAAAUGCAGUCGU	.:..:: :::::.:: ::..	UUGGUUGAAUUUUUUAAUCUG	Cleavage	1
bna-miR6035	BnaA03g53560D	5	1	21	890	910	UGGAGUAGAAAAUGCAGUCGU	::: .:::: .:::::.:	CUUACUCUAUUUCUUACUCUA	Cleavage	1
bna-miR6035	BnaA09g04490D	5	1	21	128	147	UGGAGUAGAAAAUGCAGUCGU	:. ::: :.:: :::::::::	AUAACU-CGUUGUCUACUCCA	Translation	1
