# Supplementary material for: Genome-wide characterization of ubiquitin-conjugating enzyme gene family explores its genetic effects on the oil content and yield of Brassica napus
Source: Front Plant Sci. 2023 Mar 20;14:1118339. doi: 10.3389/fpls.2023.1118339 (PMC10067767; doi:10.3389/fpls.2023.1118339)
Supplement: Supplementary file 16 [file Table_11.xlsx]

## Sheet: Sheet1
Table S11. The GO enrichment analysis of BnUBCs.
Term_ID	Description	GeneRatio	BgRatio	pvalue	p.adjust	qvalue	geneID	Count	Category
GO:0006301	postreplication repair	78/194	145/76374	9.69e-169	4.94e-167	2.04e-167	BnaA01g17560D/BnaA01g27470D/BnaA01g32320D/BnaA02g15070D/BnaA02g26550D/BnaA03g21240D/BnaA03g31080D/BnaA03g39410D/BnaA04g05360D/BnaA04g11090D/BnaA04g19750D/BnaA04g26620D/BnaA05g13430D/BnaA05g29530D/BnaA06g10330D/BnaA06g11360D/BnaA06g34030D/BnaA07g03330D/BnaA07g10040D/BnaA07g15340D/BnaA07g34450D/BnaA07g38410D/BnaA08g07400D/BnaA08g09170D/BnaA08g20580D/BnaA08g23450D/BnaA08g24010D/BnaA09g09660D/BnaA09g…	78	biological_process
GO:0031372	UBC13-MMS2 complex	25/194	25/76374	2.64e-66	6.73e-65	2.78e-65	BnaA02g15070D/BnaA02g19070D/BnaA04g05360D/BnaA05g13430D/BnaA06g11360D/BnaA07g10040D/BnaA07g34450D/BnaA07g38410D/BnaA08g20580D/BnaA08g23450D/BnaA09g30000D/BnaA09g32990D/BnaAnng13030D/BnaC02g25260D/BnaC04g28100D/BnaC05g12900D/BnaC05g18550D/BnaC06g11310D/BnaC06g20310D/BnaC06g39290D/BnaC07g13160D/BnaC08g06250D/BnaC08g17090D/BnaC08g23790D/BnaC08g38130D	25	cellular_component
GO:0051510	regulation of unidimensional cell growth	34/194	324/76374	1.93e-44	3.28e-43	1.35e-43	BnaA01g25670D/BnaA01g32320D/BnaA03g11080D/BnaA03g31080D/BnaA03g39290D/BnaA05g15820D/BnaA05g19090D/BnaA05g29530D/BnaA05g37000D/BnaA06g02780D/BnaA06g10330D/BnaA07g03430D/BnaA08g09170D/BnaA09g11510D/BnaA09g12050D/BnaA10g10300D/BnaAnng28650D/BnaC01g32800D/BnaC02g12450D/BnaC03g13840D/BnaC03g14940D/BnaC03g36410D/BnaC03g46610D/BnaC03g68670D/BnaC04g37650D/BnaC05g32470D/BnaC05g39770D/BnaC05g43870D/BnaC05g…	34	biological_process
GO:0043248	proteasome assembly	29/194	195/76374	1.41e-42	1.79e-41	7.4e-42	BnaA01g25670D/BnaA03g11080D/BnaA03g13470D/BnaA03g39290D/BnaA05g15820D/BnaA05g19090D/BnaA05g37000D/BnaA06g02780D/BnaA07g03430D/BnaA09g11510D/BnaA09g12050D/BnaA10g10300D/BnaAnng28650D/BnaC01g32800D/BnaC02g12450D/BnaC03g13840D/BnaC03g14940D/BnaC03g16350D/BnaC03g46610D/BnaC03g68670D/BnaC04g37650D/BnaC05g32470D/BnaC05g39770D/BnaC05g51200D/BnaC06g03670D/BnaC07g05830D/BnaC09g11960D/BnaC09g12280D/BnaCnng…	29	biological_process
GO:0042023	DNA endoreduplication	34/194	416/76374	1.18e-40	1.2e-39	4.96e-40	BnaA01g25670D/BnaA01g32320D/BnaA03g11080D/BnaA03g31080D/BnaA03g39290D/BnaA05g15820D/BnaA05g19090D/BnaA05g29530D/BnaA05g37000D/BnaA06g02780D/BnaA06g10330D/BnaA07g03430D/BnaA08g09170D/BnaA09g11510D/BnaA09g12050D/BnaA10g10300D/BnaAnng28650D/BnaC01g32800D/BnaC02g12450D/BnaC03g13840D/BnaC03g14940D/BnaC03g36410D/BnaC03g46610D/BnaC03g68670D/BnaC04g37650D/BnaC05g32470D/BnaC05g39770D/BnaC05g43870D/BnaC05g…	34	biological_process
GO:0033523	histone H2B ubiquitination	16/194	24/76374	1.15e-36	9.79e-36	4.04e-36	BnaA02g26550D/BnaA02g33480D/BnaA06g34030D/BnaA08g24010D/BnaA09g19140D/BnaA09g57120D/BnaAnng21880D/BnaC02g34760D/BnaC05g10640D/BnaC07g21870D/BnaC08g16110D/BnaC08g39660D/BnaCnng51240D/BnaA06g09230D/BnaA08g24020D/BnaC05g49100D	16	biological_process
GO:0009650	UV protection	14/194	33/76374	2.26e-28	1.65e-27	6.81e-28	BnaA02g26550D/BnaA02g33480D/BnaA06g34030D/BnaA08g24010D/BnaA09g19140D/BnaA09g57120D/BnaAnng21880D/BnaC02g34760D/BnaC05g10640D/BnaC07g21870D/BnaC08g39660D/BnaCnng51240D/BnaA06g09230D/BnaA08g24020D	14	biological_process
GO:0009910	negative regulation of flower development	22/194	226/76374	2.89e-28	1.84e-27	7.6e-28	BnaA02g26550D/BnaA02g33480D/BnaA05g18620D/BnaA06g34030D/BnaA08g24010D/BnaA09g16240D/BnaA09g19140D/BnaA09g57120D/BnaA10g28230D/BnaAnng21880D/BnaC02g34760D/BnaC05g10640D/BnaC05g25370D/BnaC06g01080D/BnaC07g21870D/BnaC08g16110D/BnaC08g39660D/BnaC09g17320D/BnaCnng51240D/BnaA06g09230D/BnaA08g24020D/BnaC05g49100D	22	biological_process
GO:0016881	acid-amino acid ligase activity	14/194	35/76374	6.39e-28	3.62e-27	1.49e-27	BnaA03g33820D/BnaA03g53560D/BnaA05g14770D/BnaA08g01350D/BnaC03g39070D/BnaC03g43920D/BnaC03g68670D/BnaC03g69050D/BnaC05g27620D/BnaC06g27370D/BnaC06g41780D/BnaC06g41980D/BnaC07g04570D/BnaC02g12440D	14	molecular_function
GO:0019789	SUMO transferase activity	11/194	19/76374	1.58e-24	8.07e-24	3.33e-24	BnaA01g13200D/BnaA04g02190D/BnaA07g17510D/BnaAnng34240D/BnaC01g24100D/BnaC04g23980D/BnaC05g27450D/BnaC06g16140D/BnaC08g28860D/BnaA04g27280D/BnaC04g21410D	11	molecular_function
GO:0016197	endosomal transport	14/194	100/76374	1.05e-20	4.89e-20	2.02e-20	BnaA02g26550D/BnaA06g34030D/BnaA08g24010D/BnaA09g19140D/BnaA09g57120D/BnaC02g34760D/BnaC05g10640D/BnaC07g21870D/BnaC08g16110D/BnaC08g39660D/BnaCnng51240D/BnaA06g09230D/BnaA08g24020D/BnaC05g49100D	14	biological_process
GO:0010053	root epidermal cell differentiation	12/194	53/76374	1.24e-20	5.29e-20	2.18e-20	BnaA02g19070D/BnaA06g11360D/BnaA07g34450D/BnaA07g38410D/BnaA08g23450D/BnaAnng13030D/BnaC02g25260D/BnaC05g12900D/BnaC06g20310D/BnaC06g39290D/BnaC08g17090D/BnaC08g38130D	14	biological_process
GO:0006661	phosphatidylinositol biosynthetic process	18/194	335/76374	1.19e-18	4.68e-18	1.93e-18	BnaA02g26550D/BnaA06g27860D/BnaA06g34030D/BnaA08g24010D/BnaA09g04490D/BnaA09g19140D/BnaA09g57120D/BnaC02g34760D/BnaC05g10640D/BnaC07g21870D/BnaC07g29090D/BnaC08g16110D/BnaC08g39660D/BnaCnng48400D/BnaCnng51240D/BnaA06g09230D/BnaA08g24020D/BnaC05g49100D	14	biological_process
GO:0010039	response to iron ion	12/194	81/76374	3.1e-18	1.13e-17	4.66e-18	BnaA02g19070D/BnaA06g11360D/BnaA07g34450D/BnaA07g38410D/BnaA08g23450D/BnaAnng13030D/BnaC02g25260D/BnaC05g12900D/BnaC06g20310D/BnaC06g39290D/BnaC08g17090D/BnaC08g38130D	14	biological_process
GO:0016925	protein sumoylation	10/194	93/76374	5.95e-14	2.02e-13	8.36e-14	BnaA01g13200D/BnaA04g02190D/BnaA07g17510D/BnaAnng34240D/BnaC01g24100D/BnaC04g23980D/BnaC06g16140D/BnaC08g28860D/BnaA04g27280D/BnaC04g21410D	14	biological_process
GO:0031625	ubiquitin protein ligase binding	7/194	91/76374	4.14e-09	1.32e-08	5.44e-09	BnaA02g10330D/BnaA03g12310D/BnaA10g06670D/BnaC02g14410D/BnaC03g14940D/BnaC08g12720D/BnaC09g29580D	14	molecular_function
GO:0048471	perinuclear region of cytoplasm	5/194	28/76374	9.41e-09	2.82e-08	1.17e-08	BnaA01g17560D/BnaA01g27470D/BnaA08g07400D/BnaC01g21910D/BnaC01g44130D	14	cellular_component
GO:0016558	protein import into peroxisome matrix	9/194	379/76374	6.58e-07	1.87e-06	7.7e-07	BnaA06g27860D/BnaA09g04490D/BnaA09g11510D/BnaA09g12050D/BnaC03g14940D/BnaC07g29090D/BnaC09g11960D/BnaC09g12280D/BnaCnng48400D	14	biological_process
GO:0010286	heat acclimation	7/194	370/76374	5.01e-05	0.000134559	5.55e-05	BnaA01g32320D/BnaA03g31080D/BnaA05g29530D/BnaA06g10330D/BnaA08g09170D/BnaC03g36410D/BnaC05g43870D	14	biological_process
GO:0006007	glucose catabolic process	6/194	474/76374	0.00142275	0.00362801	0.00149763	BnaA04g05360D/BnaA05g13430D/BnaA09g32990D/BnaC04g28100D/BnaC06g11310D/BnaC08g23790D	14	biological_process
GO:0042631	cellular response to water deprivation	5/194	372/76374	0.00273924	0.00664679	0.00274377	BnaA01g17560D/BnaA01g27470D/BnaA08g07400D/BnaC01g21910D/BnaC01g44130D	14	biological_process
GO:0009739	response to gibberellin	5/194	376/76374	0.00286724	0.00664679	0.00274377	BnaA01g01300D/BnaAnng19750D/BnaC01g02310D/BnaC06g36210D/BnaC07g51150D	14	biological_process
GO:0004175	endopeptidase activity	2/194	34/76374	0.00341348	0.0074722	0.0030845	BnaA09g09660D/BnaC09g51120D	14	molecular_function
GO:0016579	protein deubiquitination	4/194	242/76374	0.00351633	0.0074722	0.0030845	BnaA02g33480D/BnaAnng21880D/BnaA04g27280D/BnaA06g09230D	14	biological_process
GO:0034613	cellular protein localization	2/194	39/76374	0.00447132	0.00877066	0.0036205	BnaA09g09660D/BnaC09g51120D	14	biological_process
GO:0055062	phosphate ion homeostasis	2/194	39/76374	0.00447132	0.00877066	0.0036205	BnaA04g19750D/BnaC04g44130D	14	biological_process
GO:0010099	regulation of photomorphogenesis	2/194	42/76374	0.00516954	0.00976468	0.00403083	BnaA05g37000D/BnaC05g39770D	14	biological_process
GO:0019375	galactolipid biosynthetic process	5/194	463/76374	0.00684469	0.0124671	0.00514639	BnaA01g17560D/BnaA01g27470D/BnaA08g07400D/BnaC01g21910D/BnaC01g44130D	14	biological_process
GO:0016485	protein processing	2/194	52/76374	0.00783019	0.0137703	0.00568435	BnaA09g09660D/BnaC09g51120D	14	biological_process
GO:0006464	cellular protein modification process	2/194	93/76374	0.0236062	0.0401305	0.0165658	BnaA03g15110D/BnaC03g18130D	14	biological_process
