# Supplementary material for: Genome-wide characterization of ubiquitin-conjugating enzyme gene family explores its genetic effects on the oil content and yield of Brassica napus
Source: Frontiers journal article supplement (doi:10.3389/fpls.2023.1118339), 2023-03-20
Supplement: Table_13.xlsx [file Table_13.xlsx]

## Sheet: UBCgene.phe
Table S13. SNPs detected in the BnUBCs among 324 B. napus accessions.
ID	Chr	Start	End	Length	SNP number	SNP location	Primary flowering time (EFS)	Full flowering time (FFT1)	Final flowering time (FFT2)	Oil content (OC)	Protein content (PC)	Thousand Seed Weight (TSW)	Plant height (PH)	Main inflorescence length (MIL)	Main inflorescence silique density (MISD)	Main inflorescence silique number (MISN)
BnaA01g01300D	chrA01	671836	672911	1076	11	671836;672077;672388;672567;672585;672662;672722;672813;672868;672890;672892						Significant
BnaA01g13200D	chrA01	6638482	6638872	391	0
BnaA01g16780D	chrA01	8780941	8786012	5072	58	8780953;8780965;8781081;8781127;8781155;8781379;8781418;8781456;8781562;8781629;8781674;8781731;8781827;8781832;8781853;8781875;8781890;8781912;8782020;8782025;8782047;8782084;8782112;8782143;8782208;8782255;8782263;8782264;8782270;8782273;8782277;8782294;8782300;8782309;8782327;8782542;8782560;8782704;8782714;8782730;8782792;8782800;8782944;8783975;8783976;8783988;8784077;8784507;8784528;8784552…
BnaA01g17560D	chrA01	9282575	9284696	2122	19	9282581;9282598;9282611;9282681;9282753;9282807;9282809;9282814;9282841;9282889;9282903;9282960;9282975;9283073;9283077;9283085;9283119;9283524;9284240
BnaA01g25670D	chrA01	17894249	17895875	1627	20	17894638;17894643;17894644;17894647;17894755;17894785;17894791;17894888;17894895;17894898;17895274;17895334;17895340;17895520;17895544;17895546;17895559;17895708;17895783;17895798
BnaA01g27470D	chrA01	19201662	19204005	2344	31	19201689;19201727;19201736;19201741;19201816;19201845;19201893;19202173;19202208;19202351;19202404;19202406;19202418;19202452;19202489;19202492;19202524;19202585;19202587;19202617;19202752;19202809;19203008;19203038;19203092;19203742;19203801;19203847;19203949;19203990;19203994
BnaA01g28850D	chrA01	20018444	20021359	2916	41	20018536;20018576;20018710;20018732;20018804;20018834;20018848;20018933;20019201;20019210;20019321;20019351;20019430;20019432;20019433;20019474;20019495;20019507;20019711;20019726;20019768;20019771;20019777;20019801;20019894;20019915;20019924;20020005;20020013;20020016;20020017;20020026;20020036;20020074;20020164;20020669;20020690;20020720;20020794;20020912;20020922
BnaA01g32320D	chrA01	21770966	21772613	1648	45	21771015;21771035;21771036;21771051;21771054;21771129;21771162;21771179;21771219;21771222;21771261;21771282;21771327;21771332;21771333;21771429;21771453;21771459;21771486;21771536;21771609;21771639;21771660;21771763;21771781;21771788;21771932;21771981;21772015;21772040;21772131;21772135;21772154;21772163;21772223;21772247;21772262;21772265;21772292;21772303;21772313;21772336;21772373;21772427;217…
BnaA02g07130D	chrA02	3393966	3395451	1486	14	3394033;3394073;3394196;3394238;3394259;3394301;3394383;3394442;3394462;3394486;3394868;3395010;3395011;3395012
BnaA02g10330D	chrA02	5261109	5262667	1559	48	5261112;5261143;5261155;5261171;5261184;5261216;5261264;5261267;5261301;5261322;5261356;5261464;5261465;5261477;5261498;5261525;5261538;5261540;5261571;5261664;5261676;5261685;5261760;5261771;5261780;5261854;5261875;5261893;5261962;5261974;5262011;5262012;5262015;5262046;5262053;5262054;5262059;5262084;5262113;5262118;5262173;5262178;5262235;5262398;5262464;5262468;5262518;5262632			Significant
BnaA02g15070D	chrA02	8657064	8658372	1309	59	8657146;8657211;8657222;8657234;8657242;8657269;8657326;8657384;8657391;8657435;8657535;8657593;8657622;8657623;8657642;8657673;8657711;8657730;8657757;8657778;8657832;8657833;8657844;8657909;8657960;8657964;8657969;8658000;8658033;8658040;8658048;8658059;8658082;8658101;8658115;8658120;8658131;8658142;8658144;8658150;8658159;8658195;8658221;8658230;8658234;8658243;8658244;8658252;8658258;8658263…										Significant
BnaA02g19070D	chrA02	11768155	11769736	1582	70	11768162;11768176;11768193;11768202;11768208;11768210;11768211;11768226;11768229;11768243;11768246;11768247;11768261;11768262;11768268;11768328;11768340;11768341;11768352;11768353;11768359;11768363;11768391;11768702;11768768;11768787;11768791;11768795;11768799;11768816;11768825;11768836;11768890;11768934;11768938;11768958;11768967;11768977;11768978;11768982;11768989;11769064;11769089;11769099;117…
BnaA02g26550D	chrA02	19590818	19592379	1562	22	19590949;19591042;19591046;19591060;19591075;19591115;19591144;19591181;19591223;19591377;19591471;19591581;19591584;19591595;19591600;19591606;19591613;19591614;19591619;19591620;19591622;19591635
BnaA02g33480D	chrA02	24000200	24001647	1448	19	24000220;24000251;24000876;24000895;24000921;24001012;24001048;24001137;24001183;24001215;24001365;24001366;24001380;24001383;24001387;24001394;24001400;24001441;24001568
BnaA03g11080D	chrA03	4983062	4985045	1984	65	4983220;4983234;4983264;4983268;4983272;4983274;4983279;4983291;4983302;4983328;4983337;4983355;4983378;4983393;4983397;4983423;4983427;4983433;4983436;4983442;4983449;4983481;4983484;4983496;4983507;4983511;4983523;4983527;4983567;4983590;4983673;4983680;4983956;4983960;4983988;4984051;4984057;4984068;4984092;4984122;4984137;4984146;4984197;4984204;4984208;4984219;4984350;4984364;4984365;4984367…
BnaA03g12310D	chrA03	5591785	5593248	1464	22	5591858;5591868;5591915;5591963;5592173;5592190;5592304;5592361;5592436;5592458;5592543;5592613;5592715;5592718;5592731;5592757;5593139;5593144;5593168;5593209;5593225;5593247
BnaA03g13470D	chrA03	6125482	6127190	1709	44	6125486;6125514;6125675;6125711;6125961;6126035;6126180;6126183;6126211;6126303;6126337;6126344;6126413;6126443;6126485;6126551;6126567;6126569;6126587;6126629;6126631;6126637;6126643;6126684;6126699;6126708;6126732;6126750;6126754;6126760;6126776;6126782;6126785;6126790;6126795;6126799;6126808;6126819;6126868;6126931;6127052;6127076;6127081;6127104
BnaA03g15110D	chrA03	6964629	6965584	956	9	6964718;6964784;6964824;6965047;6965311;6965467;6965480;6965537;6965565
BnaA03g21240D	chrA03	10096997	10098375	1379	13	10097304;10097514;10097790;10097820;10097823;10098081;10098144;10098150;10098151;10098154;10098157;10098179;10098181
BnaA03g31080D	chrA03	15024995	15026497	1503	39	15025183;15025346;15025398;15025399;15025418;15025433;15025462;15025484;15025520;15025598;15025610;15025616;15025625;15025640;15025641;15025649;15025720;15025741;15025792;15025894;15025899;15025908;15025934;15025941;15025957;15025966;15025969;15025971;15026019;15026046;15026052;15026067;15026089;15026164;15026232;15026257;15026320;15026464;15026467
BnaA03g33820D	chrA03	16378799	16381250	2452	81	16378890;16378990;16379547;16379609;16379744;16379757;16379761;16379765;16379768;16379840;16379852;16379857;16379870;16379883;16379884;16380271;16380277;16380291;16380304;16380320;16380355;16380376;16380443;16380449;16380470;16380479;16380484;16380485;16380488;16380493;16380498;16380501;16380505;16380538;16380559;16380560;16380561;16380562;16380604;16380605;16380607;16380609;16380611;16380612;163…			Significant
BnaA03g37430D	chrA03	18556804	18558977	2174	59	18556864;18556932;18556943;18556967;18556974;18557074;18557112;18557115;18557123;18557129;18557170;18557199;18557218;18557221;18557222;18557229;18557247;18557254;18557255;18557281;18557296;18557316;18557344;18557351;18557471;18557472;18557483;18557492;18557494;18557499;18557505;18557516;18557543;18557570;18557577;18557664;18557705;18557767;18557772;18557782;18557814;18557939;18557983;18558310;185…
BnaA03g39290D	chrA03	19584138	19585096	959	0
BnaA03g39410D	chrA03	19632399	19639322	6924	101	19632437;19632446;19632594;19632618;19632689;19632748;19632842;19632884;19633041;19633089;19633122;19633541;19633555;19633613;19633636;19633659;19633662;19633674;19633686;19633875;19633889;19633989;19634013;19634085;19634086;19634113;19634229;19634258;19634283;19634285;19634485;19634539;19634548;19634574;19634627;19634730;19634807;19634810;19634848;19634891;19634982;19635096;19635128;19635150;196…
BnaA03g53560D	chrA03	28144299	28150347	6049	42	28148241;28149349;28149631;28149674;28149682;28149688;28149693;28149698;28149708;28149721;28149732;28149780;28149782;28149816;28149822;28149827;28149860;28149870;28149876;28149877;28149907;28149910;28149933;28149979;28150015;28150030;28150034;28150047;28150051;28150058;28150069;28150070;28150092;28150096;28150101;28150206;28150207;28150226;28150248;28150269;28150278;28150341
BnaA03g55110D	chrA03_random	162276	165336	3061	54	162299;162303;162306;162342;162394;162523;162598;162679;162729;162838;164029;164236;164421;164445;164521;164539;164569;164593;164596;164612;164621;164654;164679;164683;164685;164730;164752;164815;164827;164837;164850;164855;164890;164910;164934;164973;165026;165042;165071;165072;165084;165100;165101;165172;165175;165178;165179;165212;165214;165253;165268;165316;165318;165330
BnaA04g02190D	chrA04	1403708	1405865	2158	49	1403793;1403872;1403904;1403989;1404141;1404259;1404313;1404326;1404485;1404488;1404491;1404499;1404584;1404593;1404621;1404630;1404633;1404652;1404665;1404707;1404725;1404728;1404729;1404735;1404744;1404747;1404749;1404784;1404892;1404919;1404985;1404991;1404994;1405011;1405022;1405054;1405055;1405056;1405065;1405075;1405103;1405130;1405136;1405154;1405163;1405181;1405504;1405592;1405789
BnaA04g03650D	chrA04	2476232	2477693	1462	26	2476268;2476292;2476293;2476326;2476377;2476722;2476733;2476802;2476925;2477040;2477058;2477159;2477208;2477253;2477259;2477266;2477267;2477268;2477282;2477391;2477403;2477451;2477479;2477527;2477528;2477585
BnaA04g05360D	chrA04	4123043	4124379	1337	27	4123084;4123118;4123145;4123153;4123295;4123304;4123346;4123414;4123474;4123483;4123523;4123585;4123595;4123607;4123648;4124127;4124160;4124190;4124208;4124228;4124229;4124231;4124269;4124297;4124303;4124307;4124330
BnaA04g11090D	chrA04	9604910	9606802	1893	23	9604917;9604922;9604941;9605118;9605247;9605293;9605295;9605296;9605411;9605500;9605511;9605525;9605531;9605571;9605666;9605892;9605921;9605960;9606446;9606578;9606589;9606695;9606788						Significant
BnaA04g19750D	chrA04	15424506	15429219	4714	194	15424506;15424593;15424608;15424620;15424677;15424685;15424728;15424743;15424746;15424753;15424817;15424927;15424930;15424945;15424959;15424969;15424972;15425041;15425044;15425064;15425089;15425094;15425103;15425116;15425134;15425164;15425240;15425246;15425295;15425307;15425319;15425455;15425460;15425510;15425516;15425552;15425557;15425605;15425613;15425620;15425628;15425633;15425637;15425642;154…
BnaA04g26620D	chrA04	18823029	18824390	1362	25	18823346;18823368;18823399;18823411;18823419;18823421;18823422;18823498;18823522;18823534;18823537;18823543;18823557;18823697;18823716;18823749;18823828;18823883;18823933;18824054;18824058;18824090;18824189;18824214;18824216
BnaA04g27280D	chrA04_random	17176	18733	1558	5	17317;17549;17724;17985;18572
BnaA05g13430D	chrA05	8181309	8182567	1259	2	8181975;8181991
BnaA05g14740D	chrA05	9210370	9212035	1666	12	9210572;9210583;9211149;9211217;9211225;9211330;9211473;9211502;9211695;9211721;9211952;9211999
BnaA05g14750D	chrA05	9219100	9220617	1518	30	9219155;9219176;9219202;9219225;9219267;9219276;9219287;9219297;9219320;9219321;9219336;9219359;9219380;9219440;9219498;9219510;9219528;9219568;9219680;9219681;9219784;9219850;9220124;9220132;9220133;9220134;9220382;9220411;9220539;9220601				Significant
BnaA05g14770D	chrA05	9236508	9239034	2527	34	9236589;9236638;9236639;9236657;9236696;9236983;9237183;9237228;9237232;9237364;9237368;9237394;9237507;9237563;9237634;9237796;9237798;9237800;9237860;9237865;9237963;9237967;9237985;9237989;9238012;9238123;9238180;9238196;9238298;9238442;9238477;9238573;9238751;9238858
BnaA05g15820D	chrA05	10360161	10361557	1397	22	10360563;10360839;10360883;10360918;10360921;10360923;10360992;10361016;10361031;10361049;10361051;10361052;10361072;10361081;10361087;10361143;10361150;10361164;10361177;10361180;10361304;10361395
BnaA05g17550D	chrA05	12415950	12416642	693	13	12416033;12416134;12416215;12416262;12416296;12416303;12416378;12416474;12416485;12416534;12416537;12416554;12416588
BnaA05g17560D	chrA05	12433526	12433914	389	2	12433733;12433849
BnaA05g18620D	chrA05	13996946	13999042	2097	20	13997024;13997090;13997176;13997224;13997254;13997296;13997429;13997497;13997663;13997770;13997774;13997781;13997959;13997980;13998369;13998424;13998574;13998857;13998899;13998911
BnaA05g19090D	chrA05	14423186	14424803	1618	35	14423202;14423205;14423227;14423230;14423241;14423248;14423251;14423255;14423284;14423356;14423365;14423398;14423414;14423425;14423441;14423888;14423940;14423970;14424009;14424096;14424288;14424318;14424359;14424384;14424455;14424464;14424511;14424538;14424545;14424553;14424597;14424615;14424622;14424748;14424766
BnaA05g24190D	chrA05	18172654	18175463	2810	61	18172673;18172688;18172734;18172808;18172812;18172997;18173001;18173131;18173208;18173243;18173298;18173592;18173622;18173633;18173654;18173680;18173688;18173698;18173754;18173756;18173766;18173790;18173791;18173795;18173805;18173815;18173929;18173944;18173987;18173994;18174214;18174241;18174466;18174472;18174477;18174478;18174487;18174492;18174513;18174516;18174593;18174615;18174751;18174783;181…
BnaA05g29530D	chrA05	20586106	20587411	1306	14	20586528;20586789;20586792;20586811;20586815;20586830;20586832;20586849;20586851;20587011;20587060;20587125;20587149;20587150
BnaA05g37000D	chrA05_random	2839024	2840498	1475	57	2839051;2839070;2839072;2839075;2839077;2839090;2839251;2839263;2839309;2839314;2839339;2839377;2839383;2839405;2839430;2839469;2839499;2839503;2839505;2839523;2839702;2839707;2839736;2839739;2840026;2840033;2840036;2840042;2840044;2840046;2840057;2840058;2840060;2840061;2840066;2840069;2840096;2840117;2840177;2840184;2840199;2840212;2840231;2840237;2840240;2840242;2840270;2840285;2840346;2840356…
BnaA06g01230D	chrA06	781764	783939	2176	54	781850;781871;781883;781912;781919;781964;782020;782129;782141;782234;782285;782470;782507;782510;782511;782514;782519;782564;782594;782615;782646;782649;782650;782652;782671;782677;782686;782696;782706;782724;782726;782730;782732;782733;782735;782742;782743;782754;782757;782831;782921;782926;782942;782952;782955;783331;783523;783527;783537;783539;783578;783594;783614;783680				Significant
BnaA06g02780D	chrA06	1652888	1654307	1420	36	1652896;1652928;1652929;1652963;1652965;1652966;1652979;1652994;1653022;1653029;1653045;1653159;1653164;1653329;1653348;1653368;1653371;1653377;1653383;1653404;1653419;1653426;1653433;1653438;1653491;1653536;1653560;1653581;1653587;1653653;1653659;1653743;1653746;1653826;1653937;1654066
BnaA06g09230D	chrA06	4986689	4988401	1713	69	4986745;4986773;4986780;4986784;4986853;4986873;4986935;4986949;4987007;4987046;4987091;4987097;4987126;4987128;4987131;4987134;4987135;4987193;4987203;4987217;4987316;4987324;4987353;4987385;4987397;4987426;4987453;4987512;4987513;4987548;4987568;4987573;4987589;4987623;4987640;4987654;4987658;4987659;4987667;4987670;4987672;4987686;4987687;4987689;4987740;4987853;4987858;4987961;4987975;4987976…
BnaA06g10330D	chrA06	5473009	5474776	1768	0
BnaA06g11360D	chrA06	5918330	5920273	1944	106	5918330;5918348;5918390;5918406;5918414;5918474;5918479;5918493;5918499;5918512;5918520;5918526;5918528;5918534;5918535;5918588;5918593;5918599;5918602;5918626;5918632;5918640;5918642;5918644;5918659;5918714;5918747;5918790;5918809;5918818;5918838;5918843;5918844;5918846;5918858;5918872;5918880;5918925;5918952;5919075;5919087;5919122;5919127;5919129;5919138;5919139;5919165;5919170;5919217;5919230…
BnaA06g11590D	chrA06	6022702	6025309	2608	6	6023996;6024206;6024773;6024776;6024777;6025117
BnaA06g27860D	chrA06	19166223	19167584	1362	58	19166287;19166328;19166338;19166339;19166344;19166346;19166357;19166360;19166364;19166373;19166375;19166379;19166380;19166411;19166419;19166424;19166446;19166448;19166450;19166452;19166461;19166462;19166469;19166474;19166475;19166482;19166491;19166494;19166502;19166506;19166512;19166522;19166561;19166593;19166630;19166652;19166654;19166738;19166858;19166875;19166883;19166956;19166959;19166968;191…							Significant
BnaA06g34030D	chrA06	22531509	22533023	1515	18	22531837;22531902;22532007;22532122;22532141;22532167;22532221;22532224;22532295;22532406;22532409;22532437;22532553;22532559;22532570;22532571;22532589;22532767
BnaA07g03330D	chrA07	2973308	2985859	12552	235	2973331;2973370;2973385;2973454;2973486;2973524;2973554;2973561;2973569;2973594;2973637;2973641;2973673;2973756;2973827;2973879;2973885;2973891;2973980;2973995;2974026;2974029;2974059;2974080;2974128;2974185;2974198;2974202;2974204;2974217;2974225;2974300;2974334;2974363;2974397;2974425;2974452;2974494;2974894;2974899;2974901;2974929;2974963;2975110;2975175;2975176;2975224;2975250;2975345;2975349…
BnaA07g03430D	chrA07	3082376	3083741	1366	6	3082477;3082542;3082577;3082578;3082589;3082613
BnaA07g10040D	chrA07	9593388	9594882	1495	5	9593411;9593520;9594176;9594225;9594728
BnaA07g15340D	chrA07	13279544	13281083	1540	26	13279708;13279719;13279720;13279768;13279840;13279860;13279870;13279908;13279925;13279931;13280037;13280107;13280109;13280117;13280125;13280381;13280390;13280396;13280430;13280449;13280492;13280641;13280863;13280872;13280888;13280890	Significant	Significant
BnaA07g17510D	chrA07	14641025	14642901	1877	67	14641029;14641221;14641360;14641437;14641464;14641473;14641500;14641548;14641551;14641553;14641559;14641562;14641570;14641586;14641588;14641621;14641624;14641669;14641747;14641807;14641820;14641828;14641831;14641833;14641860;14641861;14641865;14641868;14641871;14641872;14641907;14641913;14641962;14641981;14642001;14642015;14642025;14642042;14642050;14642070;14642095;14642108;14642114;14642129;146…
BnaA07g28330D	chrA07	20470337	20471775	1439	41	20470337;20470348;20470354;20470373;20470415;20470480;20470494;20470524;20470738;20470743;20470747;20470749;20470880;20470917;20470925;20470988;20471012;20471044;20471057;20471088;20471089;20471090;20471098;20471106;20471112;20471180;20471185;20471186;20471188;20471189;20471193;20471204;20471391;20471392;20471516;20471524;20471545;20471635;20471723;20471737;20471744						Significant
BnaA07g34450D	chrA07	23414667	23416651	1985	60	23414697;23414774;23414784;23414794;23414806;23414812;23414841;23414873;23414886;23414905;23415044;23415061;23415081;23415083;23415096;23415132;23415162;23415194;23415318;23415334;23415339;23415376;23415392;23415428;23415437;23415451;23415455;23415470;23415502;23415503;23415504;23415509;23415512;23415532;23415573;23415614;23415624;23415641;23415757;23415774;23415792;23415808;23415884;23415905;234…
BnaA07g37890D	chrA07_random	1347529	1348394	866	17	1347610;1347655;1347688;1347730;1347748;1347785;1347893;1347897;1347906;1347919;1347921;1348046;1348079;1348082;1348097;1348256;1348344				Significant
BnaA07g38410D	chrA07_random	1616339	1618119	1781	25	1616557;1616566;1616572;1616836;1617025;1617039;1617063;1617065;1617103;1617725;1617764;1617767;1617808;1617817;1617843;1617859;1617925;1617927;1617960;1618000;1618022;1618032;1618078;1618107;1618117
BnaA08g01350D	chrA08	1057420	1060065	2646	47	1057497;1057508;1057935;1057984;1058055;1058102;1058139;1058166;1058279;1058291;1058350;1058414;1058444;1058529;1058560;1058570;1058590;1058795;1058864;1058884;1058905;1058906;1058914;1058936;1058941;1058948;1059035;1059086;1059107;1059110;1059122;1059125;1059137;1059143;1059149;1059170;1059236;1059239;1059245;1059389;1059397;1059398;1059424;1059440;1059529;1059662;1059690
BnaA08g02120D	chrA08	1624194	1624852	659	12	1624216;1624259;1624276;1624288;1624327;1624379;1624387;1624427;1624457;1624462;1624495;1624580
BnaA08g07400D	chrA08	7415595	7416602	1008	0
BnaA08g09170D	chrA08	8822241	8823784	1544	36	8822408;8822409;8822418;8822420;8822432;8822544;8822557;8822571;8822589;8822647;8822658;8822678;8822683;8822684;8822836;8822848;8822867;8822868;8822878;8822883;8822903;8823154;8823158;8823173;8823212;8823259;8823313;8823660;8823676;8823708;8823716;8823728;8823755;8823756;8823781;8823784
BnaA08g13930D	chrA08	11920352	11924814	4463	66	11920374;11920397;11920462;11920576;11920592;11920620;11920775;11920778;11920805;11920808;11920859;11920896;11920952;11921027;11921135;11921519;11921537;11921570;11921613;11921752;11921795;11921834;11921884;11921939;11921979;11922108;11922160;11922170;11922202;11922207;11922209;11922581;11922582;11922585;11922595;11922697;11922803;11923426;11923458;11923549;11923570;11923580;11923609;11923615;119…
BnaA08g20580D	chrA08	15479048	15480780	1733	44	15479061;15479083;15479155;15479181;15479339;15479340;15479342;15479363;15479366;15479416;15479437;15479458;15479482;15479485;15479512;15479523;15479526;15479658;15479661;15479693;15479695;15479726;15479778;15479789;15479846;15479862;15479910;15479925;15479929;15479931;15479941;15479942;15479960;15479961;15479981;15480070;15480072;15480088;15480136;15480247;15480324;15480336;15480752;15480755
BnaA08g23200D	chrA08	16611559	16614728	3170	17	16611817;16613348;16613374;16613412;16613675;16613770;16613803;16613875;16614440;16614476;16614477;16614554;16614585;16614674;16614684;16614702;16614705
BnaA08g23450D	chrA08	16689460	16691344	1885	35	16689471;16689494;16689602;16689603;16689614;16689648;16689729;16689744;16689802;16689843;16689849;16689902;16689929;16689947;16689969;16689983;16690178;16690199;16690201;16690241;16690255;16690726;16690804;16690836;16690919;16690958;16690967;16690980;16690987;16690995;16691010;16691043;16691063;16691236;16691307
BnaA08g24010D	chrA08	16938315	16939721	1407	54	16938366;16938407;16938425;16938449;16938454;16938488;16938507;16938546;16938567;16938576;16938695;16938696;16938710;16938724;16938775;16938826;16938871;16938883;16938885;16938887;16938893;16938918;16938964;16939028;16939039;16939089;16939098;16939101;16939120;16939240;16939255;16939315;16939323;16939348;16939350;16939351;16939352;16939377;16939392;16939393;16939400;16939409;16939445;16939484;169…
BnaA08g24020D	chrA08	16940213	16941605	1393	30	16940305;16940319;16940351;16940353;16940354;16940371;16940372;16940486;16940488;16940516;16940525;16940790;16940879;16940899;16940916;16940923;16940978;16940980;16940981;16940986;16940988;16941244;16941417;16941468;16941470;16941505;16941508;16941574;16941594;16941595
BnaA09g04490D	chrA09	2209624	2210956	1333	57	2210105;2210124;2210145;2210151;2210154;2210156;2210174;2210177;2210237;2210246;2210249;2210352;2210354;2210400;2210406;2210409;2210415;2210418;2210420;2210454;2210475;2210486;2210509;2210512;2210513;2210516;2210534;2210535;2210540;2210544;2210547;2210548;2210576;2210628;2210635;2210652;2210672;2210674;2210685;2210694;2210695;2210698;2210710;2210713;2210718;2210723;2210729;2210731;2210768;2210779…
BnaA09g09660D	chrA09	4865818	4867098	1281	48	4865827;4866047;4866148;4866228;4866298;4866307;4866308;4866309;4866312;4866313;4866317;4866321;4866325;4866326;4866328;4866331;4866332;4866334;4866340;4866344;4866354;4866355;4866362;4866364;4866385;4866403;4866409;4866436;4866459;4866501;4866568;4866592;4866682;4866684;4866699;4866701;4866703;4866747;4866753;4866837;4866853;4866861;4866870;4866920;4866950;4866967;4866996;4867081
BnaA09g11510D	chrA09	5900570	5901794	1225	19	5900663;5900841;5900935;5901140;5901291;5901302;5901308;5901321;5901327;5901343;5901358;5901507;5901559;5901665;5901704;5901711;5901718;5901729;5901730					Significant
BnaA09g12050D	chrA09	6314955	6316004	1050	37	6315029;6315056;6315073;6315084;6315097;6315098;6315114;6315120;6315142;6315425;6315426;6315449;6315478;6315543;6315571;6315572;6315605;6315610;6315613;6315625;6315630;6315641;6315660;6315672;6315697;6315761;6315867;6315872;6315878;6315896;6315899;6315900;6315911;6315930;6315965;6315967;6315997		Significant								Significant
BnaA09g16240D	chrA09	9649305	9650873	1569	37	9649328;9649337;9649553;9649563;9649682;9649717;9649724;9649762;9649791;9649800;9649809;9649815;9649853;9649856;9649858;9649968;9650001;9650015;9650034;9650055;9650199;9650214;9650220;9650222;9650240;9650278;9650296;9650450;9650454;9650666;9650674;9650695;9650697;9650788;9650832;9650861;9650862
BnaA09g19140D	chrA09	12022907	12024199	1293	53	12022939;12022989;12022996;12023008;12023022;12023069;12023079;12023085;12023106;12023107;12023108;12023109;12023157;12023240;12023243;12023327;12023417;12023448;12023451;12023453;12023456;12023458;12023472;12023476;12023477;12023561;12023602;12023613;12023618;12023625;12023632;12023635;12023639;12023643;12023653;12023663;12023683;12023701;12023710;12023731;12023759;12023793;12023856;12023861;120…
BnaA09g30000D	chrA09	22359097	22360539	1443	30	22359127;22359128;22359194;22359274;22359306;22359403;22359520;22359529;22359567;22359636;22359656;22359708;22359715;22359719;22359737;22359770;22359773;22359777;22359810;22359827;22359918;22360026;22360098;22360173;22360209;22360244;22360338;22360511;22360512;22360528
BnaA09g32990D	chrA09	24389854	24391472	1619	26	24389935;24389976;24390274;24390324;24390325;24390330;24390343;24390346;24390349;24390615;24390664;24390668;24390671;24390672;24390726;24390816;24390932;24390939;24390995;24391026;24391214;24391274;24391300;24391360;24391425;24391435
BnaA09g34960D	chrA09	25545538	25547108	1571	14	25545586;25545587;25545676;25545687;25545705;25545935;25546000;25546004;25546125;25546227;25546388;25546540;25546687;25546796
BnaA09g45050D	chrA09	30884928	30887459	2532	48	30884934;30884935;30884960;30885010;30885084;30885094;30885127;30885159;30885217;30885225;30885258;30885271;30885303;30885310;30885357;30885382;30885545;30885654;30885730;30885752;30885783;30885794;30885817;30885840;30885852;30886439;30886461;30886559;30886563;30886695;30886718;30886734;30886765;30886789;30886854;30886875;30886986;30886992;30887013;30887148;30887208;30887280;30887297;30887327;308…
BnaA09g57120D	chrA09_random	4035452	4036922	1471	25	4035556;4035626;4035713;4035746;4035764;4035767;4035770;4035783;4035787;4035798;4035814;4035824;4035834;4035836;4035912;4035916;4035962;4036126;4036156;4036187;4036189;4036192;4036193;4036619;4036881
BnaA10g03140D	chrA10	1601107	1603155	2049	42	1601113;1601152;1601189;1601223;1601237;1601437;1601509;1601570;1601574;1601611;1601624;1601645;1601682;1601713;1601750;1601754;1601774;1601777;1601788;1601803;1601807;1601808;1601821;1601854;1602008;1602028;1602109;1602136;1602184;1602207;1602248;1602301;1602412;1602488;1602596;1602932;1602937;1603015;1603044;1603064;1603074;1603111
BnaA10g06670D	chrA10	5152188	5153779	1592	25	5152188;5152208;5152225;5152295;5152330;5152349;5152451;5152603;5152644;5152662;5152698;5152763;5152798;5152814;5153044;5153055;5153056;5153079;5153350;5153374;5153416;5153495;5153545;5153761;5153779
BnaA10g10300D	chrA10	8797704	8799298	1595	41	8797728;8797792;8797839;8797865;8797907;8797924;8797979;8798092;8798188;8798243;8798247;8798258;8798326;8798379;8798415;8798460;8798462;8798476;8798576;8798618;8798621;8798623;8798660;8798663;8798684;8798686;8798698;8798701;8798726;8798729;8798753;8798767;8798801;8798805;8798810;8798935;8799134;8799239;8799245;8799270;8799274
BnaA10g10530D	chrA10	8986637	8987000	364	0
BnaA10g12310D	chrA10	10170717	10172097	1381	16	10170922;10171206;10171266;10171275;10171468;10171781;10171968;10171974;10171990;10172017;10172030;10172036;10172062;10172069;10172078;10172084
BnaA10g25250D	chrA10	16289585	16291032	1448	71	16289710;16289714;16289755;16289757;16289817;16289840;16289867;16289868;16289869;16289874;16289875;16289880;16289885;16289890;16289891;16289895;16289900;16289902;16289903;16289904;16289905;16289907;16289908;16289911;16289922;16289923;16289943;16289949;16289963;16289992;16290004;16290010;16290011;16290043;16290046;16290047;16290063;16290100;16290101;16290118;16290148;16290162;16290170;16290179;162…
BnaA10g28230D	chrA10_random	531490	533240	1751	2	532546;532547
BnaAnng04570D	chrAnn_random	5284726	5285418	693	14	5284730;5284795;5285037;5285057;5285074;5285126;5285171;5285195;5285234;5285270;5285277;5285295;5285301;5285392
BnaAnng09200D	chrAnn_random	9698520	9700252	1733	1	9699555
BnaAnng13030D	chrAnn_random	14021110	14023147	2038	71	14021126;14021174;14021182;14021193;14021206;14021265;14021282;14021555;14021586;14021601;14021605;14021618;14021770;14021779;14021806;14021811;14021822;14021840;14021848;14021872;14021922;14021925;14021944;14021966;14022071;14022074;14022094;14022099;14022105;14022107;14022114;14022116;14022123;14022143;14022166;14022169;14022232;14022247;14022262;14022302;14022364;14022374;14022385;14022400;140…
BnaAnng19750D	chrAnn_random	21646216	21647104	889	14	21646377;21646408;21646535;21646744;21646755;21646787;21646789;21646793;21646803;21646897;21646940;21646960;21647013;21647074
BnaAnng21880D	chrAnn_random	24359973	24361528	1556	31	24360125;24360320;24360326;24360347;24360357;24360416;24360449;24360499;24360618;24360619;24360658;24360659;24360721;24360756;24360822;24360883;24360884;24360889;24360892;24360904;24360910;24360912;24361044;24361148;24361192;24361196;24361203;24361232;24361241;24361265;24361266			Significant
BnaAnng28650D	chrAnn_random	32769308	32770832	1525	47	32769322;32769326;32769336;32769367;32769375;32769385;32769394;32769402;32769445;32769476;32769510;32769535;32769540;32769541;32769562;32769575;32769619;32769662;32769733;32769789;32769791;32769798;32769899;32769900;32769936;32769939;32769974;32769983;32770011;32770036;32770099;32770121;32770268;32770272;32770327;32770378;32770381;32770393;32770435;32770504;32770540;32770596;32770649;32770698;327…
BnaAnng34240D	chrAnn_random	39013386	39015202	1817	32	39013601;39013624;39013658;39013735;39013977;39014016;39014070;39014445;39014468;39014611;39014619;39014628;39014647;39014671;39014674;39014676;39014732;39014747;39014753;39014830;39014852;39014853;39014898;39015043;39015055;39015087;39015104;39015121;39015128;39015136;39015141;39015187	Significant	Significant					Significant	Significant	Significant
BnaC01g02310D	chrC01	1189076	1190130	1055	22	1189138;1189211;1189212;1189270;1189273;1189382;1189458;1189469;1189480;1189628;1189794;1189800;1189887;1189916;1189925;1189951;1189961;1189963;1190087;1190105;1190111;1190117
BnaC01g20530D	chrC01	14416767	14421396	4630	17	14417662;14417729;14417814;14418068;14418073;14418091;14418679;14418996;14419375;14419565;14419624;14419736;14419895;14420132;14420159;14420796;14420878
BnaC01g21910D	chrC01	15361419	15363371	1953	0
BnaC01g24100D	chrC01	18582000	18582390	391	0
BnaC01g32360D	chrC01	31483442	31483980	539	0
BnaC01g32800D	chrC01	32038104	32039653	1550	8	32038901;32038920;32039060;32039146;32039210;32039344;32039450;32039561									Significant
BnaC01g36100D	chrC01	35473529	35476671	3143	45	35473542;35473737;35473786;35473789;35473838;35473915;35473953;35473967;35473971;35474040;35474044;35474182;35474188;35474203;35474224;35474227;35474239;35474697;35474705;35474709;35474713;35474727;35474850;35474855;35474860;35474865;35474882;35474888;35474889;35474943;35474952;35475634;35475657;35475721;35475765;35475769;35476002;35476012;35476017;35476031;35476382;35476402;35476409;35476532;354…								Significant
BnaC01g39370D	chrC01	38053446	38061974	8529	0
BnaC01g44130D	chrC01_random	3723225	3725110	1886	9	3724048;3724303;3724325;3724547;3724702;3724721;3724731;3724759;3725016				Significant
BnaC02g02910D	chrC02	1325325	1325877	553	0
BnaC02g10070D	chrC02	5731145	5732661	1517	2	5731423;5732039
BnaC02g12440D	chrC02	7932837	7933721	885	0
BnaC02g12450D	chrC02	7934125	7935915	1791	22	7934138;7934148;7934149;7934152;7934154;7934169;7934173;7934184;7934251;7934295;7934320;7934325;7934340;7934346;7934347;7934386;7934395;7934404;7934466;7934533;7934534;7934537
BnaC02g14410D	chrC02	9805587	9807121	1535	16	9805875;9805882;9805950;9806413;9806503;9806588;9806627;9806637;9806931;9806993;9806997;9807043;9807062;9807070;9807088;9807093
BnaC02g25260D	chrC02	22610710	22612361	1652	46	22610881;22610904;22610922;22610926;22610949;22611009;22611011;22611234;22611262;22611302;22611347;22611370;22611401;22611410;22611545;22611592;22611607;22611614;22611624;22611697;22611710;22611712;22611755;22611770;22611771;22611812;22611833;22611839;22611867;22611877;22611904;22611907;22611983;22612007;22612025;22612049;22612112;22612120;22612137;22612197;22612238;22612270;22612274;22612310;226…							Significant
BnaC02g34760D	chrC02	37394724	37396315	1592	37	37394767;37394768;37394781;37394825;37394830;37394856;37394877;37394919;37394920;37394933;37394939;37395007;37395039;37395043;37395059;37395060;37395070;37395283;37395286;37395292;37395391;37395488;37395587;37395666;37395768;37395771;37395777;37395853;37396035;37396149;37396192;37396198;37396212;37396216;37396229;37396245;37396305
BnaC03g01930D	chrC03	921645	925529	3885	82	921646;921647;921672;921673;921707;921714;921736;921741;921763;921892;921991;922137;922215;922275;922303;922369;922546;922550;922564;922683;922711;922731;922913;922919;922965;922992;922994;923005;923022;923056;923084;923085;923088;923092;923098;923110;923116;923156;923162;923177;923178;923185;923220;923292;923297;923317;923327;923359;923365;923395;923467;923589;923674;923780;923923;924119;924570;…
BnaC03g13840D	chrC03	6676084	6677842	1759	47	6676090;6676148;6676150;6676153;6676154;6676167;6676172;6676228;6676265;6676270;6676272;6676458;6676497;6676555;6676557;6676570;6676572;6676599;6676604;6676609;6676629;6676666;6676724;6676778;6676871;6676882;6676960;6677005;6677013;6677038;6677076;6677103;6677120;6677144;6677174;6677198;6677260;6677263;6677271;6677280;6677475;6677593;6677628;6677708;6677756;6677768;6677798	Significant								Significant	Significant
BnaC03g14940D	chrC03	7282058	7283590	1533	3	7283377;7283386;7283583
BnaC03g16350D	chrC03	8305702	8307373	1672	12	8306004;8306071;8306147;8306158;8306465;8307047;8307165;8307224;8307252;8307258;8307264;8307362
BnaC03g18130D	chrC03	9284198	9285163	966	3	9284219;9284619;9284973
BnaC03g25550D	chrC03	14348817	14350319	1503	6	14348933;14348971;14349467;14349547;14349553;14350071
BnaC03g25560D	chrC03	14351178	14352247	1070	0
BnaC03g36410D	chrC03	22004387	22005922	1536	22	22004388;22004394;22004487;22004495;22004746;22005083;22005092;22005175;22005188;22005256;22005258;22005260;22005268;22005271;22005290;22005389;22005457;22005467;22005513;22005634;22005673;22005823
BnaC03g39070D	chrC03	24093324	24096709	3386	74	24093367;24093638;24094074;24094075;24094087;24094155;24094170;24094171;24094189;24094195;24094434;24094510;24094517;24094598;24094620;24095176;24095181;24095209;24095215;24095270;24095293;24095304;24095331;24095343;24095348;24095374;24095375;24095397;24095403;24095423;24095425;24095429;24095442;24095527;24095542;24095616;24095669;24095773;24095781;24095794;24095845;24095866;24095939;24096027;240…
BnaC03g43880D	chrC03	28958706	28960733	2028	41	28958825;28959232;28959240;28959286;28959291;28959297;28959300;28959306;28959326;28959336;28959352;28959364;28959407;28959422;28959426;28959432;28959435;28959453;28959454;28959456;28959515;28959522;28959526;28959527;28959593;28959596;28959792;28959793;28960547;28960549;28960560;28960574;28960582;28960617;28960630;28960635;28960637;28960644;28960699;28960704;28960710	Significant						Significant
BnaC03g43920D	chrC03	28988462	28990134	1673	26	28988474;28988499;28988518;28988686;28988792;28988811;28988831;28988860;28988882;28988985;28988987;28989017;28989026;28989075;28989078;28989454;28989511;28989618;28989622;28989714;28989726;28989744;28989835;28989939;28990063;28990115
BnaC03g43940D	chrC03	28991393	28993483	2091	25	28991743;28991770;28992425;28992560;28992644;28992766;28992780;28992783;28992891;28992983;28993033;28993143;28993145;28993151;28993153;28993154;28993165;28993245;28993279;28993357;28993391;28993392;28993415;28993450;28993467
BnaC03g46610D	chrC03	31602173	31603167	995	0
BnaC03g46750D	chrC03	31687495	31692290	4796	33	31687532;31687542;31687688;31688127;31688193;31688612;31688742;31688990;31689061;31689136;31689165;31689291;31689315;31689320;31689807;31690075;31690283;31690300;31690628;31690987;31691155;31691344;31691668;31691688;31691720;31691745;31691936;31691979;31692050;31692226;31692228;31692251;31692270
BnaC03g63160D	chrC03	52491651	52504693	13043	125	52491946;52492116;52492146;52492158;52492174;52492259;52492270;52492278;52492283;52492316;52492334;52492336;52492379;52492473;52492476;52492481;52492488;52492537;52492542;52492552;52492561;52492577;52492839;52492841;52492858;52492868;52492897;52492990;52492992;52492996;52493015;52493069;52493079;52493101;52493106;52493114;52493115;52493117;52493124;52493133;52493139;52493147;52493169;52493180;524…
BnaC03g68670D	chrC03	58345101	58345774	674	9	58345138;58345249;58345285;58345377;58345470;58345485;58345520;58345697;58345735
BnaC03g69050D	chrC03	58756769	58759799	3031	64	58756936;58756972;58757704;58757714;58757729;58757788;58757847;58757857;58757858;58757863;58757882;58757955;58757967;58757998;58758019;58758027;58758043;58758115;58758128;58758144;58758168;58758185;58758188;58758234;58758246;58758252;58758303;58758323;58758380;58758396;58758444;58758474;58758525;58758546;58758549;58758561;58758564;58758588;58758878;58758989;58759061;58759089;58759241;58759281;587…
BnaC04g10080D	chrC04	7749576	7750026	451	0
BnaC04g21410D	chrC04	22293451	22295100	1650	9	22293524;22293701;22293834;22294107;22294552;22294615;22294820;22294828;22295057
BnaC04g23980D	chrC04	25037365	25039352	1988	7	25037411;25037452;25037783;25038569;25038766;25039198;25039325			Significant
BnaC04g25550D	chrC04	26667230	26669111	1882	3	26668043;26668411;26668430
BnaC04g28100D	chrC04	29525167	29526679	1513	35	29525187;29525302;29525427;29525438;29525484;29525501;29525517;29525591;29525654;29525709;29525710;29525744;29525745;29525766;29525771;29525772;29525777;29525864;29525894;29525906;29525912;29525917;29526008;29526064;29526076;29526081;29526094;29526115;29526315;29526362;29526470;29526557;29526561;29526622;29526626
BnaC04g37650D	chrC04	38933580	38935207	1628	0
BnaC04g44130D	chrC04	44271614	44274978	3365	82	44271633;44271649;44271664;44271705;44271706;44271708;44271710;44271714;44271732;44271746;44271793;44271811;44271815;44271972;44271973;44271997;44272057;44272115;44272629;44272710;44272758;44272785;44272795;44272857;44272886;44272890;44272918;44272924;44272927;44273055;44273095;44273125;44273201;44273500;44273509;44273517;44273589;44273621;44273628;44273630;44273635;44273667;44273695;44273778;442…
BnaC04g50680D	chrC04	48203082	48204434	1353	15	48203083;48203172;48203258;48203329;48203463;48203478;48203480;48203548;48203593;48203596;48203602;48203648;48203652;48203654;48203657
BnaC05g10640D	chrC05	6121805	6123462	1658	44	6121831;6121859;6121897;6121936;6121994;6122092;6122161;6122164;6122181;6122202;6122205;6122213;6122216;6122225;6122450;6122462;6122492;6122536;6122563;6122575;6122577;6122588;6122591;6122601;6122697;6122823;6122926;6122997;6123088;6123128;6123150;6123197;6123198;6123199;6123230;6123231;6123239;6123247;6123359;6123367;6123369;6123371;6123426;6123427
BnaC05g12900D	chrC05	7494040	7496219	2180	56	7494094;7494112;7494178;7494220;7494238;7494243;7494257;7494290;7494298;7494299;7494352;7494357;7494363;7494366;7494390;7494396;7494404;7494406;7494408;7494776;7494890;7494892;7494918;7494949;7494969;7494987;7495003;7495019;7495023;7495052;7495055;7495056;7495074;7495089;7495099;7495155;7495160;7495183;7495184;7495185;7495188;7495248;7495360;7495366;7495387;7495394;7495408;7495412;7495449;7495489…		Significant
BnaC05g13430D	chrC05	7745875	7748485	2611	29	7745982;7746306;7746325;7746464;7746514;7746821;7747173;7747221;7747327;7747358;7747361;7747368;7747374;7747414;7747483;7747494;7747637;7747638;7747661;7747662;7747732;7747865;7748042;7748066;7748101;7748278;7748286;7748290;7748411
BnaC05g18550D	chrC05	12282883	12284597	1715	17	12283238;12283680;12283697;12283752;12283765;12283805;12283822;12283870;12283871;12283877;12283920;12283963;12283976;12283977;12283984;12283986;12284342
BnaC05g25370D	chrC05	20258236	20260050	1815	3	20258412;20258619;20258643
BnaC05g27450D	chrC05	24448189	24449773	1585	21	24448190;24448191;24448192;24448205;24448261;24448301;24448302;24448333;24448356;24448358;24448366;24448380;24448383;24448420;24448444;24448505;24448518;24448560;24448608;24448645;24449284
BnaC05g27600D	chrC05	24802524	24803217	694	6	24802682;24802720;24802732;24802789;24802864;24802964
BnaC05g27620D	chrC05	24805831	24807246	1416	0
BnaC05g32470D	chrC05	32053075	32054714	1640	7	32054249;32054255;32054392;32054440;32054533;32054633;32054648
BnaC05g38230D	chrC05	37006075	37008770	2696	37	37006975;37006981;37006983;37007055;37007065;37007089;37007090;37007104;37007106;37007110;37007118;37007224;37007239;37007285;37007467;37007956;37007973;37008006;37008035;37008060;37008105;37008122;37008151;37008159;37008167;37008217;37008228;37008230;37008231;37008257;37008305;37008502;37008528;37008539;37008582;37008659;37008722
BnaC05g39770D	chrC05	38200614	38202056	1443	42	38200914;38200918;38200919;38200953;38200968;38200990;38201042;38201054;38201086;38201090;38201092;38201128;38201193;38201197;38201266;38201281;38201292;38201303;38201305;38201382;38201383;38201390;38201391;38201406;38201410;38201432;38201434;38201442;38201444;38201447;38201448;38201450;38201459;38201460;38201462;38201485;38201492;38201510;38201528;38201532;38201534;38201553								Significant
BnaC05g43870D	chrC05	40485410	40486751	1342	17	40486165;40486168;40486187;40486197;40486207;40486217;40486218;40486230;40486231;40486240;40486397;40486475;40486476;40486492;40486639;40486655;40486751										Significant
BnaC05g49100D	chrC05_random	58113	59130	1018	17	58169;58176;58220;58225;58470;58477;58508;58566;58661;58802;58816;58832;58883;58890;58899;58958;59064					Significant
BnaC05g51200D	chrC05_random	2157447	2158734	1288	23	2157493;2157563;2157564;2157657;2157662;2157711;2157724;2157734;2157891;2157897;2158034;2158072;2158161;2158164;2158182;2158194;2158199;2158202;2158438;2158678;2158681;2158685;2158697
BnaC06g01080D	chrC06	1751136	1752987	1852	0
BnaC06g03670D	chrC06	4358145	4359574	1430	49	4358230;4358335;4358344;4358353;4358362;4358391;4358392;4358398;4358410;4358413;4358444;4358462;4358474;4358566;4358567;4358573;4358574;4358600;4358609;4358618;4358630;4358656;4358684;4358766;4358826;4358832;4358838;4358859;4358877;4358883;4358934;4358976;4359003;4359004;4359006;4359011;4359020;4359024;4359065;4359104;4359117;4359124;4359125;4359129;4359174;4359255;4359275;4359422;4359573
BnaC06g06060D	chrC06	6583709	6585918	2210	45	6583718;6583811;6584082;6584435;6584446;6584567;6584570;6584576;6584579;6584588;6584638;6584642;6584644;6584648;6584658;6584662;6584664;6584672;6584686;6584692;6584704;6584706;6584827;6584842;6584871;6584891;6584893;6584900;6584999;6585020;6585114;6585275;6585290;6585301;6585302;6585404;6585408;6585437;6585473;6585494;6585496;6585499;6585502;6585506;6585583
BnaC06g10370D	chrC06	12527252	12529356	2105	61	12527723;12527748;12527870;12527985;12527986;12528003;12528023;12528042;12528043;12528255;12528309;12528315;12528318;12528338;12528352;12528353;12528421;12528471;12528472;12528511;12528520;12528530;12528533;12528549;12528564;12528572;12528575;12528584;12528590;12528597;12528599;12528605;12528616;12528631;12528679;12528681;12528682;12528688;12528713;12528722;12528734;12528752;12528782;12528788;125…
BnaC06g11310D	chrC06	13210904	13212313	1410	1	13212048
BnaC06g16140D	chrC06	19129487	19131288	1802	5	19130029;19130048;19130091;19130097;19130109
BnaC06g20310D	chrC06	22342377	22344309	1933	24	22342438;22342457;22342568;22342571;22342595;22342600;22342616;22342635;22342644;22342812;22343003;22343009;22343022;22343029;22343155;22343177;22343232;22343306;22343433;22343697;22343705;22343707;22343741;22343753
BnaC06g27370D	chrC06	28727479	28728149	671	25	28727482;28727501;28727526;28727541;28727587;28727599;28727609;28727614;28727619;28727669;28727679;28727706;28727785;28727820;28727880;28727931;28727959;28727976;28728093;28728094;28728101;28728112;28728123;28728143;28728146
BnaC06g30850D	chrC06	31513657	31515100	1444	40	31513748;31513983;31514041;31514105;31514134;31514137;31514158;31514205;31514264;31514266;31514327;31514351;31514383;31514396;31514427;31514428;31514429;31514448;31514451;31514459;31514485;31514519;31514524;31514525;31514527;31514528;31514532;31514534;31514536;31514547;31514551;31514728;31514729;31514806;31514818;31514858;31514909;31514936;31514939;31515006				Significant
BnaC06g36210D	chrC06	34799747	34801759	2013	12	34800081;34800271;34800404;34800774;34800788;34800797;34800859;34800884;34800949;34801000;34801096;34801457
BnaC06g39290D	chrC06	36475629	36477713	2085	11	36476486;36476490;36476544;36476701;36476724;36476746;36476787;36476793;36476801;36476807;36476809
BnaC06g41780D	chrC06_random	1049487	1051324	1838	6	1049748;1049850;1049913;1050217;1050414;1050417
BnaC06g41980D	chrC06_random	1336999	1338220	1222	0
BnaC06g42330D	chrC06_random	1716864	1718530	1667	18	1716903;1716943;1716952;1716966;1716968;1716979;1717122;1717134;1717162;1717182;1717231;1717238;1717241;1717258;1717344;1717471;1717476;1718226
BnaC07g04570D	chrC07	7127445	7129929	2485	21	7127512;7127521;7127529;7127543;7127910;7127974;7128141;7128324;7128333;7128356;7128562;7128605;7128912;7128944;7129001;7129055;7129245;7129375;7129482;7129727;7129738								Significant
BnaC07g05830D	chrC07	9383232	9384447	1216	16	9383347;9383373;9383421;9383423;9383432;9383489;9383705;9383894;9383915;9384156;9384157;9384192;9384215;9384243;9384251;9384290
BnaC07g05960D	chrC07	9545998	9556173	10176	114	9546224;9546804;9546990;9547084;9547123;9547202;9547402;9547496;9547558;9547598;9547603;9547628;9547650;9547661;9547695;9547716;9547799;9547827;9547886;9547890;9548391;9548467;9548520;9548706;9549039;9549228;9549523;9549526;9549789;9549831;9550116;9550117;9550130;9550131;9550256;9550457;9550477;9550517;9550530;9550536;9550547;9550551;9550576;9550588;9550689;9550779;9550784;9550952;9550979;9551121…
BnaC07g13160D	chrC07	18640898	18642272	1375	0
BnaC07g21870D	chrC07	28433315	28434558	1244	0
BnaC07g29090D	chrC07	34002376	34003728	1353	67	34002380;34002392;34002455;34002460;34002461;34002472;34002518;34002592;34002623;34002672;34002682;34002696;34002705;34002709;34002710;34002762;34002763;34002799;34002829;34002878;34002909;34002950;34002992;34002995;34003001;34003004;34003007;34003117;34003139;34003175;34003282;34003301;34003303;34003307;34003327;34003328;34003332;34003351;34003356;34003363;34003391;34003397;34003443;34003459;340…
BnaC07g46220D	chrC07	43945051	43945517	467	0
BnaC07g51150D	chrC07_random	2886894	2887855	962	10	2887005;2887174;2887210;2887266;2887524;2887695;2887791;2887803;2887828;2887845
BnaC08g06250D	chrC08	8715648	8717439	1792	20	8715672;8715806;8715877;8715889;8715890;8715907;8715921;8715924;8715926;8715940;8715949;8715963;8715964;8716451;8716462;8716464;8716490;8716705;8716732;8716734
BnaC08g12720D	chrC08	17846406	17847850	1445	3	17847031;17847358;17847369
BnaC08g16110D	chrC08	20263376	20264150	775	8	20263394;20263397;20263676;20263677;20263687;20263719;20263751;20263760
BnaC08g17090D	chrC08	20803429	20805255	1827	6	20803496;20803703;20804784;20804827;20804868;20804874
BnaC08g17300D	chrC08	20895428	20898635	3208	18	20896034;20896115;20896928;20897005;20897160;20897480;20897676;20897787;20898033;20898133;20898237;20898273;20898363;20898435;20898506;20898521;20898531;20898551
BnaC08g23790D	chrC08	25974748	25977682	2935	20	25974849;25974955;25975087;25975160;25975161;25975175;25975179;25975182;25975185;25975195;25975225;25975435;25975525;25975641;25975648;25975706;25976345;25976755;25976756;25976769
BnaC08g26190D	chrC08	27679741	27681378	1638	33	27679777;27679781;27679782;27679854;27679867;27679889;27679911;27679964;27680175;27680209;27680228;27680245;27680248;27680263;27680311;27680339;27680506;27680542;27680543;27680546;27680560;27680715;27680740;27680746;27680773;27680776;27680780;27680929;27681185;27681207;27681210;27681234;27681259
BnaC08g28860D	chrC08	29347440	29349467	2028	15	29347451;29347465;29347466;29347473;29347498;29347522;29347525;29347558;29347578;29347624;29347626;29347638;29347783;29347942;29348547								Significant
BnaC08g37880D	chrC08	34442846	34445368	2523	50	34442846;34442883;34442916;34442932;34442958;34442977;34442978;34442979;34443015;34443025;34443082;34443086;34443142;34443359;34443714;34443728;34443757;34443760;34443764;34443811;34443832;34444264;34444275;34444307;34444389;34444425;34444520;34444567;34444585;34444592;34444805;34444815;34444856;34444901;34444938;34444962;34444993;34445019;34445020;34445023;34445084;34445087;34445162;34445167;344…
BnaC08g38130D	chrC08	34582915	34584888	1974	65	34582919;34583093;34583249;34583342;34583495;34583577;34583580;34583637;34583658;34583702;34583731;34583732;34583733;34583754;34583755;34583772;34583781;34583785;34583801;34583803;34583827;34583836;34583929;34584001;34584005;34584007;34584072;34584090;34584105;34584113;34584119;34584123;34584152;34584188;34584194;34584195;34584200;34584206;34584229;34584360;34584366;34584447;34584476;34584493;345…
BnaC08g39660D	chrC08	35264196	35265620	1425	25	35264216;35264232;35264444;35264455;35264511;35264513;35264599;35264601;35264618;35264631;35264650;35264755;35264763;35264765;35264768;35265014;35265074;35265217;35265228;35265258;35265413;35265420;35265447;35265495;35265524
BnaC09g11960D	chrC09	8327183	8328645	1463	0
BnaC09g12280D	chrC09	8737324	8738457	1134	30	8737372;8737732;8737785;8737797;8737816;8737819;8737827;8737836;8737852;8737858;8737885;8737886;8737914;8737943;8737979;8738021;8738036;8738051;8738175;8738205;8738216;8738220;8738253;8738266;8738294;8738312;8738325;8738336;8738383;8738396					Significant
BnaC09g17320D	chrC09	14092036	14094176	2141	13	14092175;14093627;14093707;14093750;14093845;14093943;14093961;14093967;14094032;14094139;14094140;14094153;14094155
BnaC09g29580D	chrC09	32250456	32252129	1674	13	32250489;32250497;32250592;32250619;32250689;32250897;32250999;32251171;32251344;32251557;32251681;32252017;32252018
BnaC09g34500D	chrC09	37978414	37980817	2404	22	37978488;37978489;37979608;37979666;37979708;37979716;37979719;37979733;37979903;37979913;37979930;37980032;37980263;37980306;37980319;37980560;37980564;37980566;37980587;37980660;37980747;37980795										Significant
BnaC09g51120D	chrC09_random	216935	218422	1488	40	216956;216975;216977;216978;216979;217011;217017;217021;217046;217060;217076;217078;217086;217089;217090;217171;217183;217206;217212;217214;217219;217222;217264;217275;217298;217723;217730;217747;217773;217857;217878;217912;217915;217917;217943;218086;218163;218271;218313;218411
BnaCnng21490D	chrCnn_random	20051752	20053245	1494	7	20052147;20052176;20052757;20052800;20052842;20053080;20053134
BnaCnng33990D	chrCnn_random	32240614	32242431	1818	0
BnaCnng40140D	chrCnn_random	38659939	38661187	1249	16	38660006;38660089;38660330;38660396;38660639;38660716;38660720;38660767;38660787;38660825;38660999;38661000;38661002;38661032;38661102;38661107				Significant
BnaCnng46390D	chrCnn_random	45696704	45697645	942	0
BnaCnng48400D	chrCnn_random	47685244	47686598	1355	65	47685263;47685264;47685265;47685279;47685287;47685296;47685316;47685319;47685328;47685340;47685376;47685379;47685389;47685393;47685648;47685690;47685711;47685797;47685806;47685826;47685829;47685889;47685898;47685901;47685956;47685958;47685965;47685966;47685968;47685997;47686055;47686061;47686064;47686073;47686082;47686096;47686167;47686202;47686224;47686228;47686230;47686291;47686308;47686339;476…	Significant	Significant	Significant	Significant	Significant
BnaCnng51160D	chrCnn_random	50671106	50672437	1332	25	50671111;50671120;50671151;50671314;50671338;50671391;50671490;50671610;50671631;50671643;50671656;50671673;50671681;50671736;50671751;50671754;50671908;50672092;50672382;50672383;50672389;50672403;50672415;50672429;50672433
BnaCnng51240D	chrCnn_random	50748250	50749981	1732	34	50748334;50748354;50748368;50748388;50748392;50748439;50748449;50748462;50748463;50748475;50748510;50748516;50748547;50748562;50748567;50748584;50748593;50748603;50748612;50748619;50748620;50748622;50748634;50748759;50748787;50748797;50748865;50748891;50748901;50748910;50748913;50749183;50749210;50749403
BnaCnng54670D	chrCnn_random	54496747	54497888	1142	17	54497022;54497052;54497360;54497363;54497378;54497433;54497441;54497483;54497504;54497624;54497655;54497674;54497754;54497775;54497796;54497799;54497816								Significant
BnaCnng59170D	chrCnn_random	58868629	58869556	928	0
